# Supplementary material for: Telescoped synthesis of C3-functionalized (E)-arylamidines using Ugi–Mumm and regiospecific quinazolinone rearrangements
Source: Royal Society of Chemistry journal article supplement (doi:10.1039/c9ob00073a), 2019-01-01

*Supporting Information*

**Telescoped Synthesis of C3-Functionalized (*E*)-Arylamidines Using Ugi-Mumm and Regiospecific Quinazolinone Rearrangements**

Victor A. Jaffett<sup>a†</sup>, Alok Nerurkar<sup>b†</sup>, Xufeng Cao<sup>b</sup>, Ilia A. Guzei<sup>c</sup> and Jennifer E. Golden<sup>a,b\*</sup>

|                                            |     |
|--------------------------------------------|-----|
| 1. Experimental Procedures.....            | S2  |
| 2. Table S1 .....                          | S6  |
| 3. Crystallographic Structural Report..... | S32 |
| 4. References.....                         | S38 |
| 5. NMR Spectra of Compounds.....           | S39 |

## 1. Experimental Procedures

### General Methods

Compounds not described below were purchased from commercial vendors. Purity of all final compounds was confirmed by HPLC/MS analysis and determined to be  $\geq 95\%$ .

Analytical TLC experiments were performed on aluminum-backed Silica Gel plates (TLC Silica gel 60 F<sub>254</sub>) from EMD Millipore and analyzed with 254 nm UV light using diluted samples. All compounds were characterized with the following instrumentation: Varian Unity-Inova 400 MHz NMR spectrometer (operating at 400 and 101 MHz, respectively) or a Varian Unity-Inova 500 MHz NMR spectrometer (operating at 500 and 126 MHz, respectively) in CDCl<sub>3</sub> (CDCl<sub>3</sub>:  $^1\text{H} = \delta 7.26$  ppm,  $^{13}\text{C} = \delta 77.16$  ppm). The chemical shifts ( $\delta$ ) reported are given in parts per million (ppm) and the coupling constants ( $J$ ) are in Hertz (Hz). The spin multiplicities are reported as s = singlet, br s = broad singlet, d = doublet, t = triplet, q = quartet, p = pentuplet, dd = doublet of doublet, ddd = doublet of doublet of doublet, and m = multiplet. The LC-MS analysis was performed on an Agilent 1290 Infinity II HPLC system with 1290 Infinity II Diode Array Detector and an Agilent 6120 Quadrupole LC-MS system. The analytical chromatography method utilized the following parameters: Poroshell 120 EC-C18, 1.9  $\mu\text{m}$  column, UV detection wavelength = 254 nm, Flow rate = 1.0 mL/min, Gradient = 5-100% LC-MS grade Methanol over 4 min; The organic mobile phase and aqueous mobile phase contained 0.1% LC-MS grade formic acid. The mass spectrometer utilized the following parameters: an Agilent multimode source that simultaneously acquires ESI+/APCI+; Final compounds were determined to be  $> 95\%$  purity by UV-LCMS at 254 nm. Microwave irradiated (MWI) reactions were carried out using an Anton Paar Monowave 300 Microwave Synthesis Reactor. Flash chromatography separations were carried out using a Teledyne Isco CombiFlash Rf 200 purification system with silica gel columns (normal-phase). High resolution mass spectra (HRMS) were performed by Analytical Instrument Center at the School of Pharmacy on an Electron Spray Injection (ESI) mass spectrometer. Melting points were measured on OptiMelt MPA100 Automated Melting Point System.

#### 1.1 General procedure A: Representative Procedure for the Synthesis of 2-azidobenzoic acid derivatives<sup>1</sup>

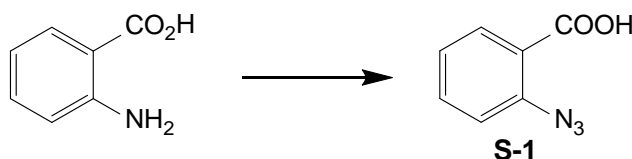

**2-Azidobenzoic acid S-1.** To a flame-dried, 250 mL round bottom flask under nitrogen was added anthranilic acid (1.4 g, 10.0 mmol, 1.0 equiv.) and dry acetonitrile (100 mL, 0.1 M). The solution was cooled to 0 °C in an ice bath. After 20 min *tert*-butyl nitrite (1.8 mL, 15.0 mmol, 1.5 equiv.) was added dropwise followed by azidotrimethylsilane (1.6 mL, 12.0 mmol, 1.2 equiv.). The reaction mixture was allowed to warm slowly to rt under nitrogen for 12 h. The reaction mixture was concentrated *in vacuo*, diluted with EtOAc (50 mL) and washed saturated brine solution (2x 50 mL). After separation, the organic layer was dried over MgSO<sub>4</sub>, filtered and concentrated *in vacuo* to yield 2-azidobenzoic acid, **S-1** (1.47 g, 90%) as a light brown solid. Material carried forward without further purification. Characterization matched literature reference.<sup>1</sup>

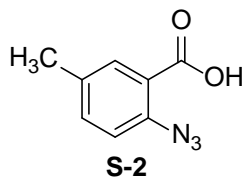

**2-Azido-5-methylbenzoic acid S-2.** Obtained using **general procedure A** as a light brown solid (467 mg, 82%). Material carried forward without further purification. Characterization matched literature reference.<sup>2</sup>

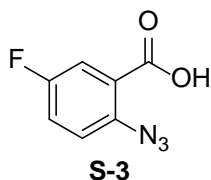

**2-Azido-5-fluorobenzoic acid S-3** Obtained using **general procedure A** as an off-white solid (513 mg, 88%). Material carried forward without further purification. Characterization matched literature reference.<sup>2</sup>

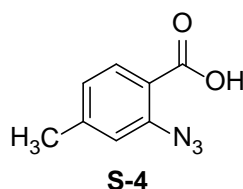

**2-Azido-4-methylbenzoic acid S-4.** Obtained using **general procedure A** as a light brown solid (201 mg, 86%). Material carried forward without further purification. <sup>1</sup>H NMR (400 MHz, Chloroform-*d*) δ 8.01 (d, *J* = 8.4 Hz, 1H), 7.05 (d, *J* = 6.5 Hz, 1H), 2.44 (s, 3H). <sup>13</sup>C NMR (101 MHz, CDCl<sub>3</sub>) δ 168.3, 145.8, 140.0, 133.4, 126.0, 119.9, 118.0, 21.6.

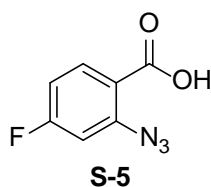

**2-Azido-4-fluorobenzoic acid S-5.** Obtained using **general procedure A** as a light brown solid (491 mg, 84%). Material carried forward without further purification. Characterization matched literature reference.<sup>1</sup>

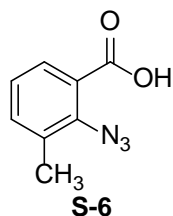

**2-Azido-3-methylbenzoic acid S-6.** Obtained using **general procedure A** as a light brown solid (283 mg, 97%). Material carried forward without further purification. Characterization matched literature reference.<sup>3</sup>

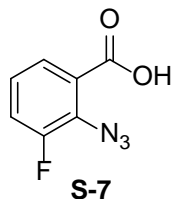

**2-Azido-3-fluorobenzoic acid S-7.** Obtained using **general procedure A** as a light brown solid (231 mg, 79%). Crude material carried forward.  $^1\text{H}$  NMR (400 MHz, DMSO- $d_6$ )  $\delta$  13.50 (s, 1H), 7.61 (dt,  $J$  = 7.8, 1.3 Hz, 1H), 7.53 (ddd,  $J$  = 11.4, 8.3, 1.5 Hz, 1H), 7.30 (td,  $J$  = 8.1, 5.1 Hz, 1H).  $^{19}\text{F}$  NMR (376 MHz, DMSO)  $\delta$  -123.87.  $^{13}\text{C}$  NMR (101 MHz, DMSO)  $\delta$  166.2, 166.2, 157.7, 155.3, 127.3, 127.2, 127.2, 127.0, 127.0, 126.6, 126.5, 120.2, 119.9.

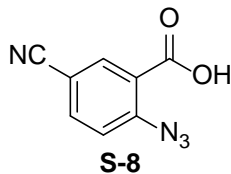

**2-Azido-5-cyanobenzoic acid S-8.** Obtained using **general procedure A**. The crude residue was purified by normal-phase chromatography (0.5% MeOH/ $\text{CH}_2\text{Cl}_2$ ) to yield 2-azido-5-cyanobenzoic acid, **S-8** (171 mg, 45%) as orange solid.  $^1\text{H}$  NMR (400 MHz, Chloroform- $d$ )  $\delta$  8.37 (d,  $J$  = 2.1 Hz, 1H), 7.86 (dd,  $J$  = 8.5, 2.0 Hz, 1H), 7.39 (d,  $J$  = 8.5 Hz, 1H).  $^{13}\text{C}$  NMR (101 MHz,  $\text{CDCl}_3$ )  $\delta$  166.7, 145.1, 137.2, 137.1, 121.6, 120.7, 117.2, 108.7.

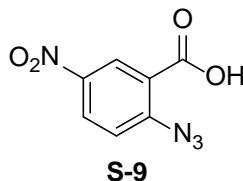

**2-Azido-5-nitrobenzoic acid S-9.** Obtained using **general procedure A** as an orange solid (476 mg, 71%). Material carried forward without further purification. Characterization matched literature reference.<sup>4</sup>

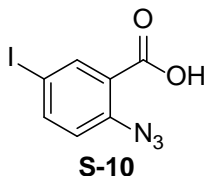

**2-Azido-5-iodobenzoic acid S-10.** Obtained using **general procedure A** as a light orange solid (859 mg, 92%). Crude material carried forward. Characterization matched literature reference.<sup>1</sup>

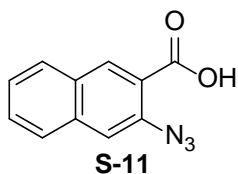

**3-Azido-2-naphthanoic acid S-11.** Obtained using **general procedure A** as a red solid (120 mg, 53%). Crude material carried forward. Characterization matched literature reference.<sup>2</sup>



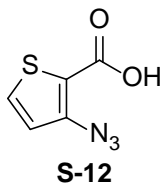

**3-Azidothiophene-2-carboxylic acid S-12.** Obtained using **general procedure A** as a brown solid (541 mg, 92%). Crude material carried forward. Characterization matched literature reference.<sup>5</sup>

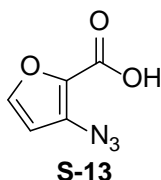

**3-Azidofuran-2-carboxylic acid S-13.** Obtained using literature procedure<sup>5</sup> as a brown solid (122 mg, 54%). Crude material carried forward. Characterization matched literature reference.<sup>5</sup>

## 1.2 Procedure for the Synthesis of *tert*-butyl benzyl(2-cyclopropylamino)ethyl) carbamate

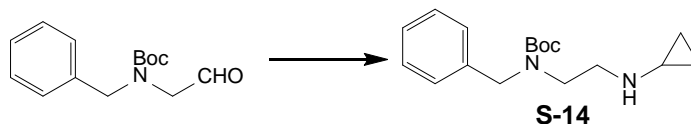

***tert*-Butyl benzyl(2-cyclopropylamino)ethyl) carbamate S-14.** To a flame-dried, 50 mL three-neck flask containing activated 3 Å molecular sieves under nitrogen was added aldehyde<sup>6</sup> (1.45 g, 5.8 mmol, 1.0 equiv.) in MeOH (23 mL, 0.25 M). Cyclopropylamine (0.42 mL, 6.1 mmol, 1.05 equiv.) was added neat dropwise while stirring at rt. The reaction mixture stirred at rt for 3 h and then cooled to 0 °C in ice bath for 20 min. NaBH<sub>4</sub> was slowly added, and the resulting reaction mixture was stirred at rt for 14 h under nitrogen. The reaction mixture was diluted with CH<sub>2</sub>Cl<sub>2</sub> (15 mL) and then filtered through celite. The collected filtrate was concentrated *in vacuo*. Crude mixture was diluted with CH<sub>2</sub>Cl<sub>2</sub> (20 mL), washed 2 X with saturated brine solution (20 mL). Organic layer was dried over MgSO<sub>4</sub> and concentrated in *vacuo*. Purified by normal phase chromatography (10-50% EtOAc/hexane) to yield diamine **S-14** as a clear oil (772 mg, 46%). <sup>1</sup>H NMR (400 MHz, Chloroform-*d*) δ 7.37 – 7.09 (m, 5H), 4.46 (s, 2H), 3.31 (d, *J* = 26.3 Hz, 2H), 2.80 (s, 2H), 2.10 (s, 1H), 1.56 – 1.34 (m, 9H), 0.40 (td, *J* = 6.5, 4.3 Hz, 2H), 0.30 – 0.22 (m, 2H). <sup>13</sup>C NMR (101 MHz, CDCl<sub>3</sub>) δ 156.0, 138.5, 128.7, 128.5, 127.7, 127.1, 79.8, 47.5, 46.7, 30.1, 28.4, 6.4.

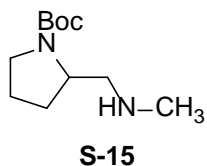

**tert-Butyl 2-((methylamino)methyl)pyrrolidine-1-carboxylate S-15.** Obtained using literature procedure<sup>7</sup> as a clear oil (844 mg, 95%). Characterization matched literature reference.<sup>8</sup>

### 1.3 Ugi-Mumm Imide (10) Optimization Table S1

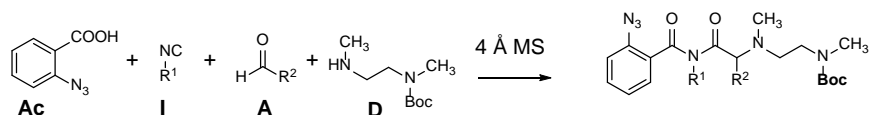

| Entry | stoichiometry   | Conditions of premixing D and A or not before addition of Ac and I | Final Reaction Conc | Solvent                                             | Isocyanide (I) | Aldehyde (A)   | Imide Yield | Acid SM Consumed | Passerini     |
|-------|-----------------|--------------------------------------------------------------------|---------------------|-----------------------------------------------------|----------------|----------------|-------------|------------------|---------------|
|       | (D:A:Ac:I)      |                                                                    |                     |                                                     |                |                |             |                  |               |
|       |                 |                                                                    |                     |                                                     | R <sup>1</sup> | R <sup>2</sup> |             |                  |               |
| 1     | (1:1:1:1)       | no premix                                                          | 0.1 M               | CH <sub>2</sub> Cl <sub>2</sub>                     | 4-MeO-phenyl   | i-Pr           | 58%         | N                | N             |
| 2     | (1:1:1:1)       | no premix                                                          | 0.1 M               | CH <sub>2</sub> Cl <sub>2</sub> :CH <sub>3</sub> OH | 4-MeO-phenyl   | i-Pr           | 68%         | N                | N             |
| 3     | (1.5:1.5:1:1)   | no premix                                                          | 0.1 M               | CH <sub>2</sub> Cl <sub>2</sub> :CH <sub>3</sub> OH | 4-MeO-phenyl   | i-Pr           | 73%         | N                | 2% (LCMS)     |
| 4     | (1.5:1.5:1:1.5) | no premix                                                          | 0.1 M               | CH <sub>2</sub> Cl <sub>2</sub> :CH <sub>3</sub> OH | 4-MeO-phenyl   | i-Pr           | 85%         | N                | 7% (LCMS)     |
| 5     | (1.5:1.5:1:1.5) | no premix                                                          | 0.2 M               | CH <sub>2</sub> Cl <sub>2</sub> :CH <sub>3</sub> OH | 4-MeO-phenyl   | i-Pr           | 82%         | N                | N             |
| 6     | (1.5:1.5:1:1.5) | premix 9 min                                                       | 0.2 M               | CH <sub>2</sub> Cl <sub>2</sub> :CH <sub>3</sub> OH | 4-MeO-phenyl   | i-Pr           | 91%         | N                | N             |
| 7     | (2:4:1:4)       | no premix                                                          | 0.2 M               | CH <sub>2</sub> Cl <sub>2</sub> :CH <sub>3</sub> OH | 4-MeO-phenyl   | i-Pr           | 85%         | Y                | N             |
| 8     | (1:1:1:1)       | no premix                                                          | 0.1 M               | CH <sub>2</sub> Cl <sub>2</sub>                     | cyclohexyl     | i-Bu           | 55%         | N                | N             |
| 9     | (2:2:1:2)       | premix 8 min                                                       | 0.2 M               | CH <sub>2</sub> Cl <sub>2</sub> :CH <sub>3</sub> OH | cyclohexyl     | i-Bu           | 60%         | N                | N             |
| 10    | (2:3:1:3)       | premix 6 min                                                       | 0.2 M               | CH <sub>2</sub> Cl <sub>2</sub> :CH <sub>3</sub> OH | cyclohexyl     | i-Bu           | 80%         | N                | N             |
| 11    | (2:4:1:4)       | premix 6 min                                                       | 0.2 M               | CH <sub>2</sub> Cl <sub>2</sub> :CH <sub>3</sub> OH | cyclohexyl     | i-Bu           | 98%         | Y                | N             |
| 12    | (1:1:1:1)       | no premix                                                          | 0.1 M               | CH <sub>2</sub> Cl <sub>2</sub>                     | 4-MeO-phenyl   | i-Bu           | 61%         | N                |               |
| 13    | (2:2:1:2)       | premix 10 min                                                      | 0.2 M               | CH <sub>2</sub> Cl <sub>2</sub> :CH <sub>3</sub> OH | 4-MeO-phenyl   | i-Bu           | 62%         | Y                | N             |
| 14    | (2:3:1:3)       | premix 17 min                                                      | 0.2 M               | CH <sub>2</sub> Cl <sub>2</sub> :CH <sub>3</sub> OH | 4-MeO-phenyl   | i-Bu           | 65%         | Y                | N             |
| 15    | (2:4:1:4)       | premix 12 min                                                      | 0.2 M               | CH <sub>2</sub> Cl <sub>2</sub> :CH <sub>3</sub> OH | 4-MeO-phenyl   | i-Bu           | 78%         | Y                | N             |
| 16    | (1:1:1:1)       | no premix                                                          | 0.1 M               | CH <sub>2</sub> Cl <sub>2</sub>                     | cyclohexyl     | i-Pr           | 83%         | N                | N             |
| 17    | (2:4:1:4)       | premix 10 min                                                      | 0.2 M               | CH <sub>2</sub> Cl <sub>2</sub> :CH <sub>3</sub> OH | cyclohexyl     | i-Pr           | 89%         | Y                | N             |
| 18    | (1:1:1:1)       | no premix                                                          | 0.1 M               | CH <sub>2</sub> Cl <sub>2</sub>                     | cyclohexyl     | phenyl         | 86%         | Y                | N             |
| 19    | (2:4:1:4)       | premix 6 min                                                       | 0.2 M               | CH <sub>2</sub> Cl <sub>2</sub> :CH <sub>3</sub> OH | cyclohexyl     | phenyl         | 97%         | Trace            | N             |
| 20    | (1:1:1:1)       | no premix                                                          | 0.1 M               | CH <sub>2</sub> Cl <sub>2</sub>                     | cyclohexyl     | H              | 0%          | N                | 30 % Isolated |
| 21    | (2:4:1:4)       | premix 10 min                                                      | 0.2 M               | CH <sub>2</sub> Cl <sub>2</sub>                     | cyclohexyl     | H              | 45%         | N                | N             |

D = diamine; A = aldehyde; Ac = Acid; I = isocyanide; SM = starting material

#### 1.4 General procedure B: Representative Procedure for the Synthesis of Imides:

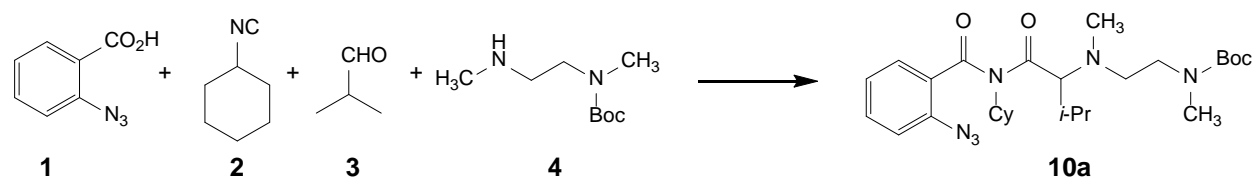

**tert-Butyl (2-((1-(2-azido-N-cyclohexylbenzamido)-3-methyl-1-oxobutan-2-yl)(methyl)amino)ethyl)(methyl)carbamate 10a.** To a flame-dried, 25 mL three-necked round bottom flask under nitrogen was added activated, powdered, 4Å molecular sieves (50 mg) followed by amine, **4** (115 mg, 0.61 mmol, 2.0 equiv.) in dry CH<sub>2</sub>Cl<sub>2</sub> (0.3 mL, 0.1 M). A solution of aldehyde, **3** (112 µL, 1.2 mmol, 4.0 equiv.) in dry CH<sub>2</sub>Cl<sub>2</sub> (0.3 mL, 0.1M) was added with stirring followed by carboxylic acid, **1** (50 mg, 0.31 mmol, 1.0 equiv.) in 3:1 dry CH<sub>2</sub>Cl<sub>2</sub>/MeOH (0.4 mL, 0.1 M) and finally isocyanide, **2** (152 µL, 1.2 mmol, 4.0 equiv.) in dry CH<sub>2</sub>Cl<sub>2</sub> (0.4 mL, 0.1 M). The reaction mixture was stirred at rt for 12 h after which the reaction was complete as judged by complete consumption of carboxylic acid on TLC (20% MeOH/CH<sub>2</sub>Cl<sub>2</sub>). The crude reaction mixture was filtered through a pad of celite and the filtrate was concentrated *in vacuo*. The crude residue was purified by normal-phase chromatography (0-20% EtOAc/hexanes) to yield the imide, **10a** (141 mg, 89%) as pale yellow oil. <sup>1</sup>H NMR (400 MHz, Chloroform-*d*) δ 7.56 – 7.48 (m, 1H), 7.38 (d, *J* = 7.6 Hz, 1H), 7.25 (d, *J* = 8.1 Hz, 1H), 7.22 – 7.16 (m, 1H), 3.95 (s, 1H), 3.28 – 3.12 (m, 3H), 2.83 (d, *J* = 8.8 Hz, 4H), 2.73 – 2.52 (m, 1H), 2.35 (d, *J* = 7.7 Hz, 3H), 2.31 – 2.20 (m, 1H), 2.06 (ddt, *J* = 13.3, 10.1, 6.7 Hz, 2H), 1.88 – 1.68 (m, 5H), 1.62 – 1.53 (m, 1H), 1.44 (s, 8H), 1.30 – 1.05 (m, 3H), 0.82 (d, *J* = 6.6 Hz, 3H), 0.68 (d, *J* = 6.6 Hz, 3H). <sup>13</sup>C NMR (101 MHz, CDCl<sub>3</sub>) δ 175.4, 172.1, 155.7, 138.0, 132.3, 129.5, 125.0, 119.2, 79.2, 74.4, 60.3, 52.2, 52.0, 47.5, 47.0, 37.9, 37.1, 34.5, 32.3, 29.5, 28.4, 27.6, 26.6, 26.4, 25.2, 19.7, 19.5. HRMS (ESI): Calculated for C<sub>27</sub>H<sub>42</sub>N<sub>6</sub>O<sub>4</sub> (M<sup>+</sup>+H): 515.33403; Found: 515.33594.

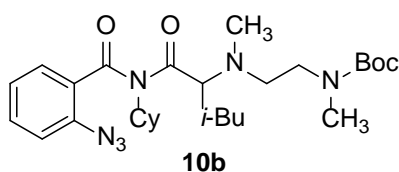

**tert-Butyl (2-((1-(2-azido-N-cyclohexylbenzamido)-4-methyl-1-oxopentan-2-yl)(methyl)amino)ethyl)(methyl)carbamate 10b.** Obtained using **general procedure B**. Purified by normal-phase chromatography (0-10% EtOAc/hexanes) to yield the imide, **10b** (158 mg, 98%) as a pale-yellow oil. <sup>1</sup>H NMR (400 MHz, Chloroform-*d*) δ 7.56 – 7.49 (m, 1H), 7.45 (d, *J* = 7.6 Hz, 1H), 7.25 (d, *J* = 8.3 Hz, 1H), 7.20 (td, *J* = 7.5, 1.0 Hz, 1H), 4.18 (s, 1H), 3.33 – 3.15 (m, 1H), 2.81 (s, 3H), 2.60 – 2.42 (m, 2H), 2.23 – 2.08 (m, 4H), 2.00 (q, *J* = 12.2 Hz, 1H), 1.80 (t, *J* = 8.5 Hz, 4H), 1.70 (d, *J* = 12.1 Hz, 1H), 1.64 – 1.49 (m, 2H), 1.43 (s, 9H), 1.36 (dt, *J* = 13.8, 6.5 Hz, 1H), 1.31 – 1.15 (m, 4H), 0.73 (d, *J* = 6.6 Hz, 3H), 0.66 (d, *J* = 6.6 Hz, 3H). <sup>13</sup>C NMR (101 MHz, CDCl<sub>3</sub>) δ 176.6, 171.0, 155.6, 138.5, 132.6, 130.2, 129.0, 124.8, 119.4, 79.2, 66.4, 59.0, 50.8, 47.0, 46.5, 37.9, 35.0, 34.7, 34.5, 31.8, 29.5, 28.4, 26.5, 26.4, 25.3, 24.4, 22.7, 21.8. HRMS (ESI): Calculated for C<sub>28</sub>H<sub>44</sub>N<sub>6</sub>O<sub>4</sub> (M<sup>+</sup>+H): 529.34968; Found: 529.35162.

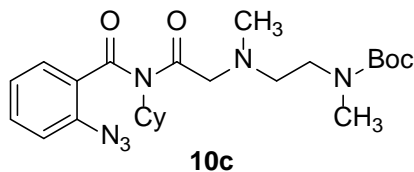

**tert-Butyl (2-((2-(2-azido-*N*-cyclohexylbenzamido)-2-oxoethyl)(methyl)amino)ethyl)(methyl) carbamate 10c.** Obtained using **general procedure B**. Purified by normal-phase chromatography (0-20% EtOAc/hexanes) to yield the imide, **10c** (65 mg, 45%) as a pale-yellow oil.  $^1\text{H}$  NMR (400 MHz, Chloroform-*d*)  $\delta$  7.53 – 7.45 (m, 2H), 7.26 – 7.21 (m, 1H), 7.19 (td,  $J$  = 7.6, 1.1 Hz, 1H), 4.24 (s, 1H), 3.24 (d,  $J$  = 13.3 Hz, 2H), 3.03 (s, 2H), 2.81 (s, 3H), 2.41 – 2.31 (m, 2H), 2.06 (dd,  $J$  = 12.6, 4.0 Hz, 2H), 2.02 (s, 4H), 1.85 – 1.71 (m, 4H), 1.62 (dt,  $J$  = 13.5, 3.5 Hz, 1H), 1.43 (s, 9H), 1.36 – 1.09 (m, 3H).  $^{13}\text{C}$  NMR (101 MHz,  $\text{CDCl}_3$ )  $\delta$  173.9, 170.2, 155.4, 138.7, 132.4, 130.4, 128.5, 124.5, 119.6, 79.5, 63.0, 58.2, 53.4, 52.8, 45.6, 45.5, 40.7, 34.6, 30.3, 28.4, 26.4, 25.3. HRMS (ESI): Calculated for  $\text{C}_{24}\text{H}_{36}\text{N}_6\text{O}_4$  ( $\text{M}^+\text{+H}$ ): 473.28708; Found: 473.28737.

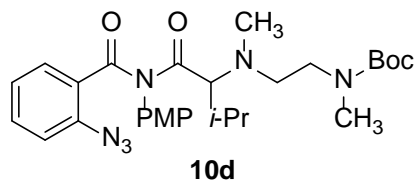

**tert-Butyl (2-((1-(2-azido-*N*-(4-methoxyphenyl)benzamido)-3-methyl-1-oxobutan-2-yl)(methyl)amino)ethyl)(methyl)carbamate 10d.** Obtained using **general procedure B**. Purified by normal-phase chromatography (0-15% EtOAc/hexanes) to yield the imide, **10d** (140 mg, 85%) as a pale-yellow oil.  $^1\text{H}$  NMR (400 MHz, Chloroform-*d*)  $\delta$  7.38 – 7.28 (m, 2H), 7.14 – 7.03 (m, 4H), 6.84 (d,  $J$  = 8.5 Hz, 2H), 3.77 (s, 4H), 3.51 – 3.16 (m, 2H), 2.83 (d,  $J$  = 12.5 Hz, 4H), 2.42 (s, 3H), 2.15 (dp,  $J$  = 10.4, 6.6 Hz, 1H), 1.45 (s, 10H), 0.99 (d,  $J$  = 6.9 Hz, 3H), 0.94 (d,  $J$  = 6.6 Hz, 3H).  $^{13}\text{C}$  NMR (101 MHz,  $\text{CDCl}_3$ )  $\delta$  175.0, 170.6, 159.4, 155.7, 136.4, 131.0, 130.8, 130.3, 129.4, 128.5, 124.6, 118.5, 114.3, 79.3, 72.36, 55.4, 52.0, 51.6, 47.5, 47.0, 38.2, 38.0, 34.6, 28.5, 28.2, 28.0, 20.1, 19.6. HRMS (ESI): Calculated for  $\text{C}_{28}\text{H}_{38}\text{N}_6\text{O}_5$  ( $\text{M}^+\text{+H}$ ): 539.29765; Found: 539.29880.

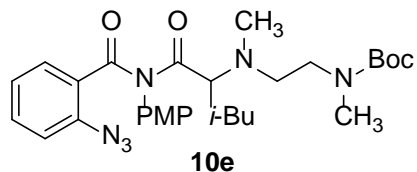

**tert-Butyl (2-((1-(2-azido-*N*-(4-methoxyphenyl)benzamido)-4-methyl-1-oxopentan-2-yl)(methyl)amino)ethyl)(methyl)carbamate 10e.** Obtained using **general procedure B**. Purified by normal-phase chromatography (0-15% EtOAc/hexanes) to yield the imide, **10e** (132 mg, 78%) as a pale-yellow oil.  $^1\text{H}$  NMR (400 MHz, Chloroform-*d*)  $\delta$  7.36 (td,  $J$  = 7.8, 1.5 Hz, 2H), 7.21 – 7.04 (m, 4H), 6.94 – 6.76 (m, 2H), 4.05 – 3.85 (m, 1H), 3.77 (s, 3H), 3.44 – 3.09 (m, 2H), 2.81 (d,  $J$  = 5.4 Hz, 3H), 2.75 – 2.56 (m, 2H), 2.35 (s, 3H), 1.63 (dd,  $J$  = 14.0, 7.4 Hz, 2H), 1.44 (s, 9H), 0.89 (d,  $J$  = 5.7 Hz, 3H), 0.80 (d,  $J$  = 6.0 Hz, 3H).  $^{13}\text{C}$  NMR (101 MHz,  $\text{CDCl}_3$ )  $\delta$  176.8, 170.5, 159.4, 155.6, 136.5, 131.2, 130.8, 130.0, 129.2, 128.7, 124.7, 118.4, 114.4, 79.2, 64.4, 55.4, 51.4, 47.5, 47.0, 38.1, 37.7, 36.1, 35.5, 34.6, 28.5, 24.5, 23.0, 21.8. HRMS (ESI): Calculated for  $\text{C}_{29}\text{H}_{40}\text{N}_6\text{O}_5$  ( $\text{M}^+\text{+H}$ ): 553.31330; Found: 553.31416.

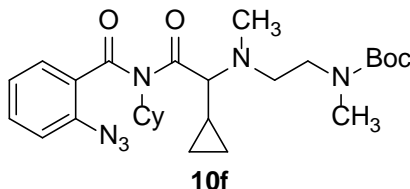

**tert-Butyl (2-((2-(2-azido-N-cyclohexylbenzamido)-1-cyclopropyl-2-oxoethyl)(methyl)amino)ethyl)(methyl)carbamate 10f.** Obtained using **general procedure B**. Purified by normal-phase chromatography (0-50% EtOAc/hexanes) to yield the imide, **10f** (140 mg, 89%) as a yellow oil.  $^1\text{H}$  NMR (400 MHz, Chloroform-*d*)  $\delta$  7.50 (t,  $J$  = 7.8 Hz, 1H), 7.45 (d,  $J$  = 7.5 Hz, 1H), 7.23 (d,  $J$  = 8.1 Hz, 1H), 7.18 (t,  $J$  = 7.6 Hz, 1H), 4.24 – 4.05 (m, 1H), 3.38 – 3.09 (m, 1H), 2.83 (s, 3H), 2.71 – 2.52 (m, 2H), 2.45 (dd,  $J$  = 30.8, 8.5 Hz, 1H), 2.17 (s, 4H), 2.02 (d,  $J$  = 11.9 Hz, 1H), 1.90 – 1.66 (m, 5H), 1.68 – 1.54 (m, 1H), 1.44 (s, 9H), 1.31 – 1.11 (m, 3H), 1.00 (dddd,  $J$  = 13.1, 9.7, 8.1, 5.0 Hz, 1H), 0.56 (d,  $J$  = 8.1 Hz, 2H), 0.14 (d,  $J$  = 10.4 Hz, 1H).  $^{13}\text{C}$  NMR (101 MHz,  $\text{CDCl}_3$ )  $\delta$  176.3, 176.0, 170.8, 155.6, 138.5, 132.5, 130.2, 128.7, 124.7, 119.3, 79.2, 73.6, 59.0, 51.2, 50.5, 46.9, 46.5, 38.7, 34.8, 34.6, 31.1, 29.7, 28.4, 26.5, 26.4, 25.3, 8.6, 8.1, 4.4, 2.7. HRMS (ESI): Calculated for  $\text{C}_{27}\text{H}_{40}\text{N}_6\text{O}_4$  ( $\text{M}^+\text{+H}$ ): 513.31838; Found: 513.31920.

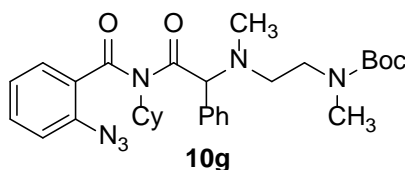

**tert-Butyl (2-((2-(2-azido-N-cyclohexylbenzamido)-2-oxo-1-phenylethyl)(methyl)amino)ethyl)(methyl)carbamate 10g.** Obtained using **general procedure B**. Purified by normal-phase chromatography (0-20% EtOAc/hexanes) to yield the imide, **10g** (163 mg, 97%) as a yellow oil.  $^1\text{H}$  NMR (400 MHz, Chloroform-*d*)  $\delta$  7.41 (td,  $J$  = 7.8, 1.6 Hz, 1H), 7.37 – 7.27 (m, 1H), 7.26 – 7.18 (m, 5H), 7.12 – 7.04 (m, 2H), 4.49 (s, 1H), 3.86 (d,  $J$  = 13.3 Hz, 1H), 3.36 – 3.05 (m, 2H), 2.66 (s, 3H), 2.45 (t,  $J$  = 7.0 Hz, 2H), 2.16 (d,  $J$  = 7.0 Hz, 3H), 2.11 – 1.80 (m, 2H), 1.76 – 1.58 (m, 3H), 1.52, 1.47 – 1.31 (m, 13H), 1.15 – 1.04 (m, 2H).  $^{13}\text{C}$  NMR (101 MHz,  $\text{CDCl}_3$ )  $\delta$  175.8, 171.2, 155.6, 138.0, 135.5, 132.3, 129.7, 129.6, 129.5, 128.8, 128.1, 124.8, 119.0, 79.1, 74.4, 59.6, 51.3, 46.8, 46.2, 39.6, 39.4, 34.4, 30.6, 29.6, 28.4, 26.4, 26.3, 25.2. HRMS (ESI): Calculated for  $\text{C}_{30}\text{H}_{40}\text{N}_6\text{O}_4$  ( $\text{M}^+\text{+H}$ ): 549.31838; Found: 549.31889.

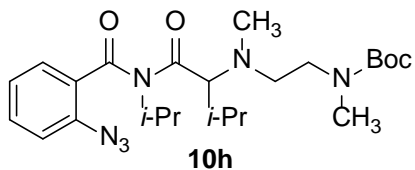

**tert-Butyl (2-((1-(2-azido-N-isopropylbenzamido)-3-methyl-1-oxobutan-2-yl)(methyl)amino)ethyl)(methyl)carbamate 10h.** Obtained using **general procedure B**. Purified by normal-phase chromatography (0-40% EtOAc/hexanes) to yield the imide, **10h** (128 mg, 88%) as a yellow oil.  $^1\text{H}$  NMR (400 MHz, Chloroform-*d*)  $\delta$  7.57 – 7.47 (m, 1H), 7.38 (d,  $J$  = 7.6 Hz, 1H), 7.25 (d,  $J$  = 8.2 Hz, 1H), 7.21 (t,  $J$  = 7.6 Hz, 1H), 4.26 (d,  $J$  = 13.7 Hz, 1H), 3.39 (dd,  $J$  = 20.1, 10.1 Hz, 2H), 3.21 (ddd,  $J$  = 13.8, 7.6, 5.9 Hz, 1H), 2.84 (d,  $J$  = 8.8 Hz, 4H), 2.65 (dd,  $J$  = 35.8, 11.9 Hz, 1H), 2.38 (d,  $J$  = 5.5 Hz, 3H), 2.08 (dq,  $J$  = 10.1, 6.6 Hz, 1H), 1.45 (d,  $J$  = 5.3 Hz, 12H), 1.40 (d,  $J$  = 6.8 Hz, 3H),

0.85 (d,  $J = 6.6$  Hz, 3H), 0.76 (d,  $J = 6.9$  Hz, 3H).  $^{13}\text{C}$  NMR (101 MHz,  $\text{CDCl}_3$ )  $\delta$  175.8, 171.9, 155.7, 137.8, 132.1, 129.2, 129.1, 125.0, 119.1, 79.2, 74.0, 52.1, 52.0, 47.6, 47.0, 37.8, 37.1, 34.5, 28.4, 27.6, 22.0, 19.9, 19.8, 19.6. HRMS (ESI): Calculated for  $\text{C}_{24}\text{H}_{38}\text{N}_6\text{O}_4$  ( $\text{M}^+ + \text{H}$ ): 475.30273; Found: 475.30264.

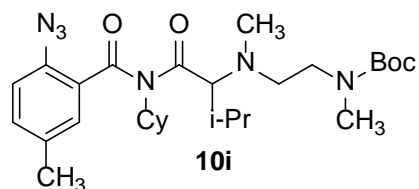

**tert-Butyl (2-((1-(2-azido-N-cyclohexyl-5-methylbenzamido)-3-methyl-1-oxobutan-2-yl)(methyl)amino)ethyl)(methyl)carbamate 10i.** Obtained using **general procedure B**. Purified by normal-phase chromatography (0-40% EtOAc/hexanes) to yield the imide, **10i** (175 mg, 78%) as yellow oil.  $^1\text{H}$  NMR (400 MHz, Chloroform- $d$ )  $\delta$  7.32 (dd,  $J = 8.2, 2.0$  Hz, 1H), 7.20 – 7.04 (m, 2H), 4.04 (t,  $J = 11.7$  Hz, 1H), 3.48 – 3.23 (m, 1H), 3.21 – 3.07 (m, 2H), 2.83 (d,  $J = 9.8$  Hz, 4H), 2.74 – 2.47 (m, 1H), 2.34 (d,  $J = 8.9$  Hz, 6H), 2.30 – 2.19 (m, 1H), 2.11 – 1.94 (m, 2H), 1.78 (dtd,  $J = 22.0, 12.5, 12.0, 3.6$  Hz, 5H), 1.60 (dd,  $J = 7.1, 3.5$  Hz, 1H), 1.44 (s, 9H), 1.32 – 1.10 (m, 3H), 0.79 (d,  $J = 6.6$  Hz, 3H), 0.63 (d,  $J = 6.9$  Hz, 3H).  $^{13}\text{C}$  NMR (101 MHz,  $\text{CDCl}_3$ )  $\delta$  175.2, 172.1, 155.6, 135.3, 135.0, 133.0, 130.2, 129.3, 119.1, 79.2, 74.7, 60.0, 52.0, 47.5, 46.9, 37.8, 36.9, 34.4, 32.4, 29.4, 28.4, 27.5, 26.6, 26.4, 25.2, 20.7, 19.6, 19.5. HRMS (ESI): Calculated for  $\text{C}_{28}\text{H}_{44}\text{N}_6\text{O}_4$  ( $\text{M}^+ + \text{H}$ ): 529.34968; Found: 529.35027.

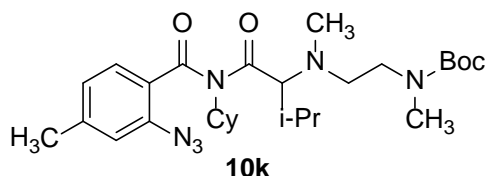

**tert-Butyl (2-((1-(2-azido-N-cyclohexyl-4-methylbenzamido)-3-methyl-1-oxobutan-2-yl)(methyl)amino)ethyl)(methyl)carbamate 10k.** Obtained using **general procedure B**. Purified by normal-phase chromatography (0-40% EtOAc/hexanes) to yield the imide, **10k** (143 mg, 67%) as a yellow oil.  $^1\text{H}$  NMR (400 MHz, Chloroform- $d$ )  $\delta$  7.25 (d,  $J = 6.5$  Hz, 2H), 7.00 (s, 1H), 6.96 (d,  $J = 7.9$  Hz, 1H), 3.98 (d,  $J = 12.4$  Hz, 1H), 3.26 – 3.09 (m, 3H), 2.80 (d,  $J = 8.3$  Hz, 4H), 2.39 (s, 3H), 2.31 (s, 3H), 2.21 (dt,  $J = 12.3, 5.9$  Hz, 1H), 2.02 (ddd,  $J = 13.6, 10.3, 6.8$  Hz, 2H), 1.82 – 1.67 (m, 4H), 1.41 (s, 9H), 1.27 – 1.08 (m, 4H), 0.78 (d,  $J = 6.6$  Hz, 3H), 0.65 (d,  $J = 6.7$  Hz, 3H).  $^{13}\text{C}$  NMR (101 MHz,  $\text{CDCl}_3$ )  $\delta$  175.31, 172.41, 155.75, 143.64, 138.20, 129.94, 126.89, 125.87, 119.76, 79.32, 74.48, 60.19, 52.04, 47.56, 38.03, 34.53, 32.41, 29.59, 28.51, 27.64, 26.66, 26.51, 25.32, 21.61, 19.89, 19.65. HRMS (ESI): Calculated for  $\text{C}_{28}\text{H}_{44}\text{N}_6\text{O}_4$  ( $\text{M}^+ + \text{H}$ ): 529.34968; Found: 529.35153.

## 1.5 General procedure C: Representative Procedure for the Synthesis of Quinazolinones:

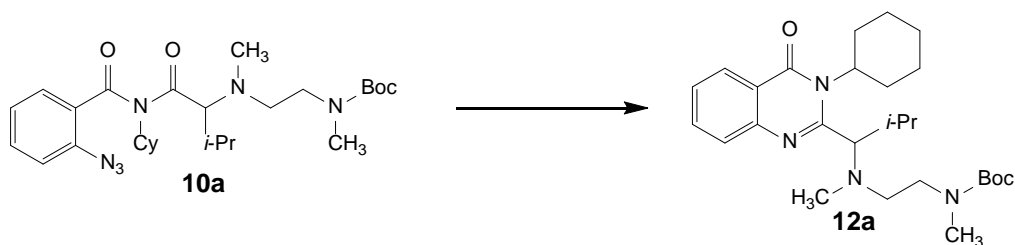

**tert-Butyl (2-((1-(3-cyclohexyl-4-oxo-3,4-dihydroquinazolin-2-yl)-2-methylpropyl)(methyl)amino)ethyl)(methyl)carbamate 12a.** To a flame-dried, 25 mL, three-necked round bottom flask equipped with a reflux condenser, under nitrogen was added triphenylphosphine (101 mg, 0.38 mmol, 1.5 equiv.) followed by dry toluene (1.0 mL). A solution of imide **10a** (132 mg, 0.26 mmol, 1.0 equiv.) in dry toluene (1.6 mL) was added and the reaction mixture was stirred at rt for 30 min. Next, the reaction mixture was heated to 110 °C and stirred at reflux for 12h, after which the reaction was complete as judged by complete consumption of imide **10a** on TLC (30% EtOAc/hexanes). The crude reaction mixture was filtered through a pad of celite and the filtrate was concentrated *in vacuo*. The crude residue was purified by normal-phase chromatography (0-50% EtOAc/hexanes) to yield the quinazolinone, **12a** (92 mg, 76%) as clear colorless oil. <sup>1</sup>H NMR (400 MHz, Chloroform-*d*) δ 8.21 (dd, *J* = 8.0, 1.4 Hz, 1H), 7.67 (t, *J* = 7.7 Hz, 1H), 7.58 (d, *J* = 8.1 Hz, 1H), 7.40 (t, *J* = 7.5 Hz, 1H), 4.19 (t, *J* = 12.1 Hz, 1H), 3.51 – 3.45 (m, 2H), 3.15 (d, *J* = 38.2 Hz, 2H), 2.90 (dd, *J* = 23.8, 11.6 Hz, 2H), 2.77 (s, 3H), 2.67 (s, 1H), 2.58 (d, *J* = 12.9 Hz, 3H), 1.94 (d, *J* = 9.5 Hz, 2H), 1.77 – 1.60 (m, 4H), 1.40 (s, 10H), 1.36 (s, 1H), 1.21 (t, *J* = 7.0 Hz, 1H), 1.12 (d, *J* = 6.7 Hz, 3H), 0.79 (d, *J* = 6.4 Hz, 3H). HRMS (ESI): Calculated for C<sub>27</sub>H<sub>42</sub>N<sub>4</sub>O<sub>3</sub> (M<sup>+</sup>+H): 471.33297; Found: 471.33369.

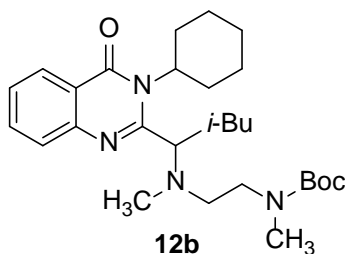

**tert-Butyl (2-((1-(3-cyclohexyl-4-oxo-3,4-dihydroquinazolin-2-yl)-3-methylbutyl)(methyl)amino)ethyl)(methyl)carbamate 12b.** Obtained using **general procedure C**. Purified by normal-phase chromatography (0-20% EtOAc/hexanes) to yield the quinazolinone, **12b** (81 mg, 60%) as yellow oil. <sup>1</sup>H NMR (400 MHz, Chloroform-*d*) δ 8.20 (d, *J* = 7.9 Hz, 1H), 7.66 (t, *J* = 7.5 Hz, 1H), 7.61 (d, *J* = 8.1 Hz, 1H), 7.40 (t, *J* = 7.4 Hz, 1H), 4.35 (s, 1H), 3.77 – 3.69 (m, 1H), 3.65 (t, *J* = 7.1 Hz, 0H), 3.54 (s, 1H), 3.42 – 3.06 (m, 3H), 2.84 (d, *J* = 10.7 Hz, 3H), 2.76 – 2.60 (m, 5H), 2.52 – 2.31 (m, 5H), 2.26 (s, 1H), 1.91 (d, *J* = 11.0 Hz, 3H), 1.81 – 1.54 (m, 5H), 1.44 (s, 5H), 1.40 – 1.22 (m, 14H), 0.92 (d, *J* = 6.2 Hz, 3H), 0.87 (t, *J* = 7.1 Hz, 6H). <sup>13</sup>C NMR (101 MHz, CDCl<sub>3</sub>) δ 163.4, 155.5, 154.5, 146.2, 133.6, 127.3, 126.5, 126.2, 122.2, 79.2, 64.0, 58.9, 58.3, 56.2, 51.2, 49.5, 47.7, 47.1, 38.9, 35.3, 34.6, 29.7, 29.2, 28.5, 28.3, 27.0, 25.8, 25.3, 24.8, 24.8, 23.7, 22.9, 22.8, 21.8. HRMS (ESI): Calculated for C<sub>28</sub>H<sub>44</sub>N<sub>4</sub>O<sub>3</sub> (M<sup>+</sup>+H): 485.34862; Found: 485.34931.

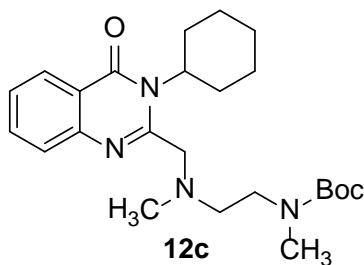

**tert-Butyl (2-(((3-cyclohexyl-4-oxo-3,4-dihydroquinazolin-2-yl)methyl)(methyl)amino)ethyl(methyl)carbamate 12c** Obtained using **general procedure C**. Purified by normal-phase chromatography Purified by normal-phase chromatography (0-5% MeOH/CH<sub>2</sub>Cl<sub>2</sub>) to yield the quinazolinone, **12c** (29 mg, 89%) as a yellow oil.. <sup>1</sup>H NMR (400 MHz, Chloroform-*d*) δ 8.23 (d, *J* = 7.9 Hz, 1H), 7.70 (t, *J* = 7.6 Hz, 1H), 7.63 (d, *J* = 8.1 Hz, 1H), 7.44 (t, *J* = 7.5 Hz, 1H), 4.57 – 4.30 (m, 1H), 3.68 (s, 2H), 3.42 – 3.26 (m, 2H), 2.83 (d, *J* = 8.1 Hz, 3H), 2.76 (dd, *J* = 12.0, 3.6 Hz, 1H), 2.68 (d, *J* = 7.2 Hz, 3H), 2.38 (s, 3H), 1.98 – 1.87 (m, 2H), 1.82 – 1.62 (m, 3H), 1.39 (d, *J* = 29.0 Hz, 14H). <sup>13</sup>C NMR (101 MHz, CDCl<sub>3</sub>) δ 162.8, 155.5, 153.9, 146.5, 133.8, 126.9, 126.8, 126.4, 122.5, 79.4, 77.4, 63.9, 60.4, 54.5, 46.8, 46.1, 42.0, 41.9, 34.8, 28.8, 28.4, 26.8, 25.2. HRMS (ESI): Calculated for C<sub>24</sub>H<sub>36</sub>N<sub>4</sub>O<sub>3</sub> (M<sup>+</sup>+H): 429.28602; Found: 429.28666.

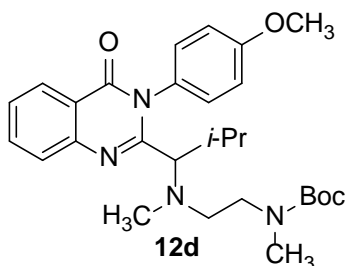

**tert-Butyl (2-(((1-(3-(4-methoxyphenyl)-4-oxo-3,4-dihydroquinazolin-2-yl)-2-methylpropyl)(methyl)amino)ethyl(methyl)carbamate 12d**. Obtained using **general procedure C**. Purified by normal-phase chromatography (0-15% EtOAc/hexanes) to yield the quinazolinone, **12d** (88mg, 81%) as an off-white foam. <sup>1</sup>H NMR (400 MHz, Chloroform-*d*) δ 8.28 (dd, *J* = 8.0, 1.4 Hz, 1H), 7.74 (t, *J* = 7.6 Hz, 1H), 7.69 (dd, *J* = 8.2, 1.3 Hz, 1H), 7.49 – 7.41 (m, 1H), 7.33 – 7.18 (m, 1H), 7.05 (d, *J* = 7.6 Hz, 3H), 3.88 (s, 3H), 3.20 (d, *J* = 75.7 Hz, 1H), 3.03 (d, *J* = 12.6 Hz, 3H), 2.66 (d, *J* = 69.6 Hz, 5H), 2.34 – 2.24 (m, 3H), 1.40 (s, 9H), 0.93 (d, *J* = 6.7 Hz, 3H), 0.84 (d, *J* = 7.3 Hz, 3H). <sup>13</sup>C NMR (101 MHz, CDCl<sub>3</sub>) δ 163.0, 159.8, 156.2, 155.7, 147.1, 134.2, 130.8, 129.9, 129.6, 127.5, 127.0, 126.5, 121.0, 114.6, 79.1, 70.9, 55.5, 50.0, 49.0, 47.6, 46.6, 39.8, 3.4, 29.6, 29.4, 28.4, 20.8, 20.3. HRMS (ESI): Calculated for C<sub>28</sub>H<sub>38</sub>N<sub>4</sub>O<sub>4</sub> (M<sup>+</sup>+H): 495.29658; Found: 495.29764.

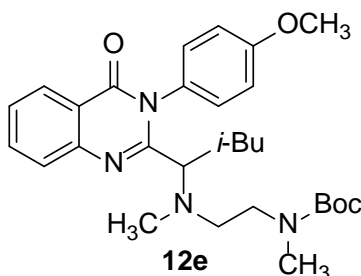

**tert-Butyl (2-(((1-(3-(4-methoxyphenyl)-4-oxo-3,4-dihydroquinazolin-2-yl)-3-methylbutyl)(methyl)amino)ethyl(methyl)carbamate 12e**. Obtained using **general procedure C**. Purified by normal-phase chromatography (0-15% EtOAc/hexanes) to yield quinazolinone **12e** (86mg, 88%)



as off-white foam.  $^1\text{H}$  NMR (400 MHz, Chloroform- $d$ )  $\delta$  8.37 – 8.10 (m, 1H), 7.74 (qd,  $J$  = 8.2, 1.6 Hz, 2H), 7.46 (ddd,  $J$  = 8.2, 6.4, 1.8 Hz, 1H), 7.41 – 7.26 (m, 1H), 7.15 – 6.95 (m, 3H), 3.87 (s, 3H), 3.42 (s, 1H), 3.19 – 2.75 (m, 2H), 2.61 (d,  $J$  = 65.4 Hz, 3H), 2.40 – 2.21 (m, 1H), 2.13 (s, 3H), 2.05 (d,  $J$  = 6.9 Hz, 1H), 1.48 (s, 1H), 1.43 – 1.31 (m, 10H), 0.80 (d,  $J$  = 6.5 Hz, 3H), 0.77 (d,  $J$  = 6.2 Hz, 4H).  $^{13}\text{C}$  NMR (101 MHz,  $\text{CDCl}_3$ )  $\delta$  163.1, 159.8, 147.0, 134.2, 130.9, 129.5, 128.9, 127.7, 127.0, 126.7, 121.2, 114.5, 79.1, 62.4, 55.5, 38.6, 34.2, 34.1, 33.9, 33.2, 28.4, 25.1, 23.1, 22.2. HRMS (ESI): Calculated for  $\text{C}_{27}\text{H}_{42}\text{N}_6\text{O}_4$  ( $\text{M}^+\text{+H}$ ): 509.31223; Found: 509.31305.

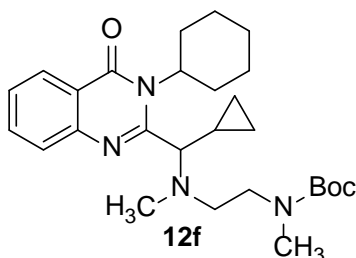

**tert-Butyl (2-(((3-cyclohexyl-4-oxo-3,4-dihydroquinazolin-2-yl)(cyclopropyl)methyl)(methyl)amino)ethyl)(methyl)carbamate 12f.** Obtained using **general procedure C**. Purified by normal-phase chromatography (0-30% EtOAc/hexanes) to yield the quinazolinone, **12f** (95mg, 70%) as a yellow oil.  $^1\text{H}$  NMR (400 MHz, Chloroform- $d$ )  $\delta$  8.21 (d,  $J$  = 7.7 Hz, 1H), 7.66 (d,  $J$  = 7.5 Hz, 1H), 7.59 (d,  $J$  = 8.1 Hz, 1H), 7.41 (t,  $J$  = 7.5 Hz, 1H), 3.28 (d,  $J$  = 26.4 Hz, 2H), 3.14 – 3.01 (m, 1H), 2.91 – 2.68 (m, 6H), 2.52 (s, 1H), 2.44 (s, 3H), 1.88 (t,  $J$  = 6.0 Hz, 2H), 1.74 – 1.59 (m, 3H), 1.48 – 1.21 (m, 16H), 0.86 (qd,  $J$  = 11.6, 11.2, 6.2 Hz, 2H), 0.49 (dq,  $J$  = 9.9, 5.8 Hz, 2H).  $^{13}\text{C}$  NMR (101 MHz,  $\text{CDCl}_3$ )  $\delta$  161.1, 153.4, 144.4, 131.5, 124.9, 124.4, 124.2, 119.9, 77.2, 56.8, 49.5, 45.2, 44.3, 38.2, 32.5, 27.5, 26.9, 26.5, 26.2, 24.6, 23.2. HRMS (ESI): Calculated for  $\text{C}_{27}\text{H}_{40}\text{N}_4\text{O}_3$  ( $\text{M}^+\text{+H}$ ): 469.31732; Found: 469.31814.

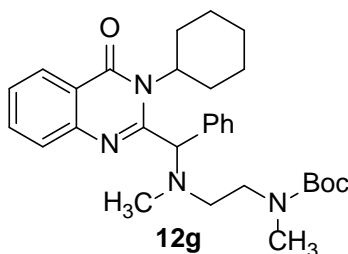

**tert-Butyl (2-(((3-cyclohexyl-4-oxo-3,4-dihydroquinazolin-2-yl)(phenyl)methyl)(methyl)amino)ethyl)(methyl)carbamate 12g.** Obtained using **general procedure C**. Purified by normal-phase chromatography (0-25% EtOAc/hexanes) to yield the quinazolinone, **12g** (99mg, 82%) as a colorless oil.  $^1\text{H}$  NMR (400 MHz, Chloroform- $d$ )  $\delta$  8.20 (d,  $J$  = 8.0 Hz, 1H), 7.73 – 7.69 (m, 2H), 7.46 – 7.41 (m, 1H), 7.38 – 7.27 (m, 5H), 5.06 (d,  $J$  = 32.8 Hz, 1H), 4.36 – 4.05 (m, 1H), 3.69 (s, 1H), 3.36 (d,  $J$  = 45.0 Hz, 3H), 3.12 – 2.95 (m, 1H), 2.87 (s, 1H), 2.72 (d,  $J$  = 6.1 Hz, 4H), 2.53 (s, 5H), 2.33 (s, 1H), 1.81 – 1.51 (m, 3H), 1.42 (d,  $J$  = 21.3 Hz, 13H), 1.20 – 1.11 (m, 2H).  $^{13}\text{C}$  NMR (101 MHz,  $\text{CDCl}_3$ )  $\delta$  163.2, 155.8, 146.6, 137.4, 133.9, 129.2, 128.8, 128.72, 128.2, 127.5, 126.8, 126.5, 122.3, 79.3, 59.3, 51.8, 47.5, 46.9, 40.7, 34.8, 28.6, 28.3, 26.6, 26.5, 25.2. HRMS (ESI): Calculated for  $\text{C}_{30}\text{H}_{40}\text{N}_4\text{O}_3$  ( $\text{M}^+\text{+H}$ ): 505.31732; Found: 505.31802.

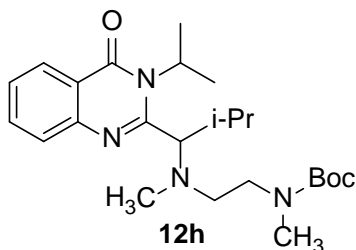

**tert-Butyl 2-((1-(3-isopropyl-4-oxo-3,4-dihydroquinazolin-2-yl)-2-methylpropyl)(methyl)amino)ethyl(methyl)carbamate 12h.** Obtained using **general procedure C**. Purified by normal-phase chromatography (0-40% EtOAc/hexanes) to yield the quinazolinone, **12h** (75 mg, 71%) as a colorless oil.  $^1\text{H}$  NMR (400 MHz, Chloroform-*d*)  $\delta$  8.22 (dd,  $J$  = 8.0, 1.4 Hz, 1H), 7.73 – 7.64 (m, 1H), 7.59 (dd,  $J$  = 8.2, 1.2 Hz, 1H), 7.47 – 7.36 (m, 1H), 4.68 (p,  $J$  = 6.7 Hz, 1H), 3.52 (d,  $J$  = 10.1 Hz, 1H), 3.24 (dt,  $J$  = 14.2, 7.2 Hz, 1H), 3.18 – 2.86 (m, 1H), 2.84 – 2.63 (m, 5H), 2.54 (d,  $J$  = 7.5 Hz, 3H), 1.71 (d,  $J$  = 6.7 Hz, 3H), 1.65 (d,  $J$  = 6.8 Hz, 3H), 1.42 (s, 9H), 1.11 (d,  $J$  = 6.7 Hz, 3H), 0.81 (d,  $J$  = 6.4 Hz, 3H).  $^{13}\text{C}$  NMR (101 MHz,  $\text{CDCl}_3$ )  $\delta$  163.1, 156.1, 155.7, 146.6, 133.7, 127.2, 126.4, 126.3, 122.0, 79.3, 76.8, 71.5, 71.3, 50.7, 47.8, 47.2, 39.4, 39.1, 34.7, 30.0, 29.8, 28.5, 21.1, 20.6, 19.9. HRMS (ESI): Calculated for  $\text{C}_{24}\text{H}_{38}\text{N}_4\text{O}_3$  ( $\text{M}^+\text{+H}$ ): 431.30167; Found: 431.30255.

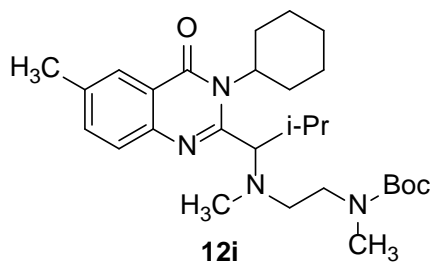

**tert-Butyl 2-((1-(3-cyclohexyl-6-methyl-4-oxo-3,4-dihydroquinazolin-2-yl)-2-methylpropyl)(methyl)amino)ethyl(methyl)carbamate 12i.** Obtained using **general procedure C**. Purified by normal-phase chromatography (0-15% EtOAc/hexanes) to yield the quinazolinone, **12i** (114 mg, 69%) as a colorless oil.  $^1\text{H}$  NMR (400 MHz, Chloroform-*d*)  $\delta$  7.99 (s, 1H), 7.48 (d,  $J$  = 1.2 Hz, 2H), 4.17 (t,  $J$  = 12.1 Hz, 1H), 3.45 (d,  $J$  = 10.1 Hz, 1H), 3.14 (d,  $J$  = 45.9 Hz, 2H), 2.95 – 2.53 (m, 12H), 2.45 (s, 3H), 1.93 (d,  $J$  = 9.8 Hz, 2H), 1.73 – 1.61 (m, 4H), 1.40 (s, 9H), 1.33 (d,  $J$  = 8.6 Hz, 2H), 1.11 (d,  $J$  = 6.7 Hz, 3H), 0.78 (d,  $J$  = 6.4 Hz, 3H).  $^{13}\text{C}$  NMR (101 MHz,  $\text{CDCl}_3$ )  $\delta$  163.3, 155.8, 155.4, 144.6, 136.5, 135.2, 127.1, 125.8, 121.8, 79.4, 71.5, 59.5, 40.3, 34.6, 30.2, 29.3, 28.7, 28.6, 27.1, 26.9, 25.4, 21.5, 21.2, 20.7. HRMS (ESI): Calculated for  $\text{C}_{28}\text{H}_{44}\text{N}_4\text{O}_3$  ( $\text{M}^+\text{+H}$ ): 485.34862; Found: 485.34952.

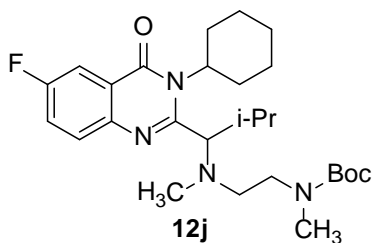

**tert-butyl 2-((1-(3-cyclohexyl-6-fluoro-4-oxo-3,4-dihydroquinazolin-2-yl)-2-methylpropyl)(methyl)amino)ethyl(methyl)carbamate 12j.** Obtained using crude material from **general procedure B** carried forward in **general procedure C**. Purified by normal-phase chromatography (0-15% EtOAc/hexanes) to yield the quinazolinone, **12j** (176 mg, 84% over both steps) as pale-yellow oil.  $^1\text{H}$  NMR (400 MHz, Chloroform-*d*)  $\delta$  7.83 (dd,  $J$  = 8.7, 3.0 Hz, 1H), 7.59 (dd,  $J$  = 8.9, 4.9

Hz, 1H), 7.39 (td,  $J = 8.5, 3.0$  Hz, 1H), 4.19 (t,  $J = 12.0$  Hz, 1H), 3.46 (d,  $J = 10.0$  Hz, 1H), 3.30 – 3.03 (m, 3H), 3.03 – 2.83 (m, 3H), 2.80 – 2.64 (m, 3H), 2.58 (d,  $J = 9.9$  Hz, 3H), 1.94 (d,  $J = 9.8$  Hz, 2H), 1.69 (q,  $J = 12.8, 8.9$  Hz, 3H), 1.40 (s, 10H), 1.35 (d,  $J = 8.6$  Hz, 3H), 1.12 (d,  $J = 6.7$  Hz, 3H), 0.79 (d,  $J = 6.3$  Hz, 3H).  $^{19}\text{F}$  NMR (376 MHz,  $\text{CDCl}_3$ )  $\delta$  -113.65.  $^{13}\text{C}$  NMR (101 MHz,  $\text{CDCl}_3$ )  $\delta$  162.3, 161.9, 159.4, 155.6, 155.5, 143.05, 129.5, 129.4, 123.1, 123.0, 122.4, 122.1, 111.1, 110.9, 79.2, 71.5, 59.5, 40.1, 34.5, 30.0, 29.0, 28.4, 26.8, 26.7, 25.2, 21.0, 20.6. HRMS (ESI): Calculated for  $\text{C}_{27}\text{H}_{41}\text{FN}_4\text{O}_3$  ( $\text{M}^+ + \text{H}$ ): 489.32355; Found: 489.32439.

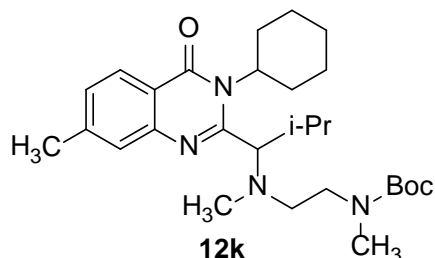

**tert-butyl (2-((1-(3-cyclohexyl-7-methyl-4-oxo-3,4-dihydroquinazolin-2-yl)-2-methylpropyl)(methyl)amino)ethyl)(methyl)carbamate 12k.** Obtained using **general procedure C**. Purified by normal-phase chromatography (0-20% EtOAc/hexanes) to yield the quinazolinone, **12k** (84 mg, 70%) as a colorless oil, 70%.  $^1\text{H}$  NMR (400 MHz, Chloroform- $d$ )  $\delta$  8.08 (d,  $J = 8.1$  Hz, 1H), 7.38 (s, 1H), 7.21 (dd,  $J = 8.2, 1.6$  Hz, 1H), 4.15 (q,  $J = 8.2, 4.8$  Hz, 1H), 3.46 (d,  $J = 10.0$  Hz, 1H), 3.14 (d,  $J = 25.8$  Hz, 2H), 3.00 – 2.81 (m, 3H), 2.80 – 2.64 (m, 5H), 2.55 (d,  $J = 13.0$  Hz, 3H), 2.45 (s, 3H), 1.96 – 1.87 (m, 2H), 1.68 (dd,  $J = 18.0, 9.6$  Hz, 4H), 1.40 (s, 9H), 1.33 (d,  $J = 8.1$  Hz, 3H), 1.11 (d,  $J = 6.6$  Hz, 3H), 0.77 (d,  $J = 6.4$  Hz, 3H).  $^{13}\text{C}$  NMR (101 MHz,  $\text{CDCl}_3$ )  $\delta$  163.2, 156.4, 155.8, 146.6, 144.6, 128.0, 126.9, 126.3, 119.7, 79.3, 71.6, 59.4, 49.8, 47.8, 40.2, 34.6, 30.1, 29.3, 28.8, 28.53, 27.0, 26.9, 25.3, 21.9, 21.1, 20.7. HRMS (ESI): Calculated for  $\text{C}_{28}\text{H}_{44}\text{N}_4\text{O}_3$  ( $\text{M}^+ + \text{H}$ ): 485.34862; Found: 485.34772.

## 1.6 General procedure D: General Procedure for the synthesis of Benzamidines:

### Step 1. Representative Procedure for Boc-deprotection:

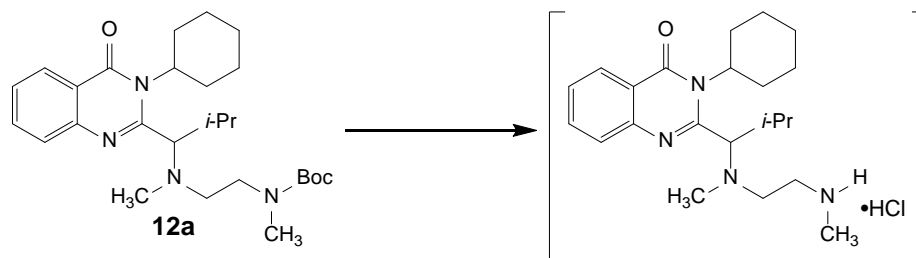

To a flame-dried, 10 mL, one-necked round bottom flask under nitrogen was dissolved quinazolinone (84 mg, 0.18 mmol, 1.0 equiv.) in dry  $\text{CH}_2\text{Cl}_2$  (1.0 mL) and the solution cooled to 0 °C in an ice-bath with stirring. HCl in dioxane (4M, 0.22 mL, 5.0 equiv.) was added dropwise. Following the addition the ice-bath was removed and the reaction mixture allowed to warm to rt. The reaction mixture was stirred at rt for 12h after which the reaction was complete as judged by complete consumption of quinazolinone on TLC (30% EtOAc/hexanes). The solvent was removed *in vacuo* to yield the HCl salt of boc-deprotected quinazolinone which was carried forward without purification (65 mg, 89%).

## Step 2. Representative Procedure for the synthesis of Benzamidines:

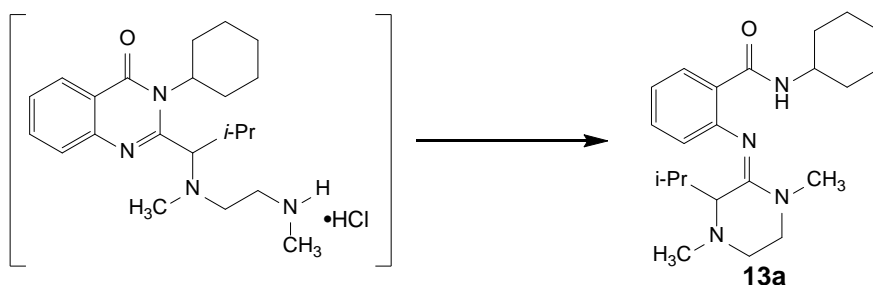

### (E)-N-cyclohexyl-2-((3-isopropyl-1,4-dimethylpiperazin-2-ylidene)amino)benzamide **13a**.

Triethylamine (100  $\mu$ L, 0.7 mmol, 5 equiv.) was added to a solution of HCl salt of quinazolinone (55 mg, 0.14 mmol, 1.0 equiv.) in MeOH (1.4 mL, 0.1M) in a 4 mL microwave vial while stirring. The vial was capped and heated in a microwave reactor at 100  $^{\circ}$ C for 30 min. The reaction mixture was allowed to cool to rt and the solvent removed *in vacuo*. The crude residue was purified by normal-phase chromatography (0-5% MeOH/ $\text{CH}_2\text{Cl}_2$ ) to yield the benzamidine, **13a** (37 mg, 66% over two steps) as a yellow oil.  $^1\text{H}$  NMR (500 MHz, Chloroform-*d*)  $\delta$  8.93 (d,  $J$  = 8.0 Hz, 1H), 8.17 (dd,  $J$  = 7.9, 1.7 Hz, 1H), 7.28 – 7.24 (m, 1H), 7.05 – 7.01 (m, 1H), 6.59 (dd,  $J$  = 7.8, 1.2 Hz, 1H), 3.95 (tdt,  $J$  = 11.5, 7.9, 3.9 Hz, 1H), 3.47 – 3.39 (m, 2H), 3.36 (ddd,  $J$  = 12.3, 7.1, 4.6 Hz, 1H), 3.23 (ddd,  $J$  = 11.9, 7.0, 4.4 Hz, 1H), 3.11 (s, 3H), 2.63 (ddd,  $J$  = 12.0, 6.6, 4.7 Hz, 1H), 2.49 (s, 3H), 2.07 – 1.97 (m, 2H), 1.76 – 1.69 (m, 3H), 1.68 – 1.61 (m, 1H), 1.38 (ddt,  $J$  = 17.9, 12.8, 6.4 Hz, 2H), 1.21 – 1.10 (m, 3H), 0.79 (d,  $J$  = 6.7 Hz, 3H), 0.63 (d,  $J$  = 6.9 Hz, 3H).  $^{13}\text{C}$  NMR (126 MHz,  $\text{CDCl}_3$ )  $\delta$  165.9, 160.5, 148.5, 131.2, 131.1, 125.8, 122.4, 122.0, 63.9, 48.7, 48.4, 47.8, 45.0, 37.4, 33.8, 33.7, 32.4, 25.9, 25.3, 20.1, 19.2. HRMS (ESI): Calculated for  $\text{C}_{22}\text{H}_{34}\text{N}_4\text{O}$  ( $\text{M}^+\text{+H}$ ): 371.28054; Found: 371.28091.

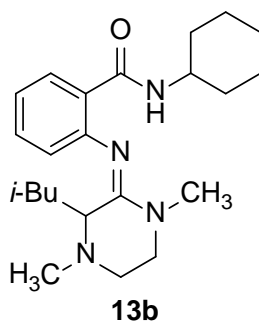

### (E)-N-cyclohexyl-2-((3-isobutyl-1,4-dimethylpiperazin-2-ylidene)amino)benzamide **13b**.

Obtained using **general procedure D**. Purified by normal-phase chromatography (0-10% MeOH/ $\text{CH}_2\text{Cl}_2$ ) to yield the benzamidine, **13b** (20mg, 34%) as a pale-yellow gum.  $^1\text{H}$  NMR (400 MHz, Chloroform-*d*)  $\delta$  8.56 (d,  $J$  = 8.1 Hz, 1H), 8.18 (dd,  $J$  = 7.9, 1.6 Hz, 1H), 7.30 – 7.25 (m, 2H), 7.05 (td,  $J$  = 7.6, 1.1 Hz, 1H), 6.61 (dd,  $J$  = 7.8, 1.1 Hz, 1H), 3.97 (dddd,  $J$  = 14.6, 10.6, 7.9, 3.9 Hz, 1H), 3.61 (td,  $J$  = 11.8, 5.3 Hz, 1H), 3.49 (dd,  $J$  = 10.6, 3.7 Hz, 1H), 3.41 (ddd,  $J$  = 14.0, 11.7, 5.2 Hz, 1H), 3.12 (ddd,  $J$  = 12.1, 5.3, 1.7 Hz, 1H), 3.08 (s, 3H), 2.73 – 2.66 (m, 1H), 2.50 (s, 3H), 2.02 – 1.94 (m, 2H), 1.71 (dq,  $J$  = 11.7, 4.0 Hz, 2H), 1.63 (dt,  $J$  = 12.6, 3.8 Hz, 1H), 1.54 (ddd,  $J$  = 14.1, 10.6, 3.9 Hz, 1H), 1.49 – 1.34 (m, 3H), 1.16 (dddd,  $J$  = 26.0, 15.5, 12.6, 5.6 Hz, 3H), 0.91 (ddd,  $J$  = 13.6, 9.7, 3.6 Hz, 1H), 0.66 (d,  $J$  = 6.6 Hz, 3H), 0.27 (d,  $J$  = 6.5 Hz, 3H).  $^{13}\text{C}$  NMR (101 MHz,  $\text{CDCl}_3$ )  $\delta$  165.7, 161.8, 148.6, 131.4, 131.3, 125.6, 122.9, 122.4, 56.8, 48.2, 44.9, 43.8, 42.2, 40.1, 37.3, 33.8, 33.6, 25.9, 25.1, 25.1, 24.4, 23.4, 20.3. HRMS (ESI): Calculated for  $\text{C}_{23}\text{H}_{36}\text{N}_4\text{O}$  ( $\text{M}^+\text{+H}$ ): 385.29619; Found: 385.29719.

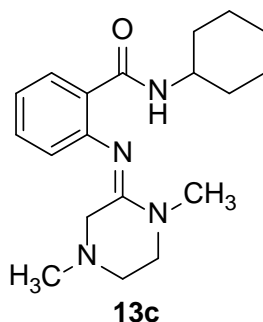

**(E)-N-cyclohexyl-2-((1,4-dimethylpiperazin-2-ylidene)amino)benzamide 13c.** Obtained using **general procedure D**. Purified by normal-phase chromatography (0-10% MeOH/CH<sub>2</sub>Cl<sub>2</sub>) to yield the benzamidine, **13c** (12 mg, 58%) as an amber gum. <sup>1</sup>H NMR (500 MHz, Chloroform-*d*) δ 8.42 (d, *J* = 8.0 Hz, 1H), 8.12 (dd, *J* = 7.9, 1.7 Hz, 1H), 7.29 – 7.25 (m, 1H), 7.09 – 7.04 (m, 1H), 6.65 (d, *J* = 7.8 Hz, 1H), 3.94 (tdt, *J* = 11.0, 7.8, 3.8 Hz, 1H), 3.37 (t, *J* = 5.5 Hz, 2H), 3.12 (s, 3H), 2.95 (s, 2H), 2.61 (t, *J* = 5.6 Hz, 2H), 2.19 (s, 3H), 1.99 (dq, *J* = 12.4, 4.0 Hz, 2H), 1.71 (dp, *J* = 11.9, 3.9 Hz, 2H), 1.63 (dt, *J* = 12.2, 3.9 Hz, 1H), 1.40 (tdt, *J* = 15.5, 12.0, 3.6 Hz, 2H), 1.15 (td, *J* = 12.4, 9.1 Hz, 3H). <sup>13</sup>C NMR (126 MHz, CDCl<sub>3</sub>) δ 166.0, 155.5, 148.3, 131.3, 131.2, 126.0, 123.2, 122.7, 55.1, 52.4, 49.7, 48.4, 45.5, 36.5, 33.6, 25.9, 25.1. HRMS (ESI): Calculated for C<sub>19</sub>H<sub>28</sub>N<sub>4</sub>O (M<sup>+</sup>+H): 329.23359; Found: 329.23434.

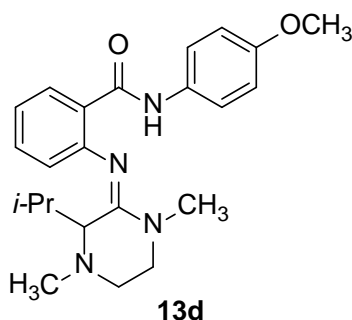

**(E)-2-((3-isopropyl-1,4-dimethylpiperazin-2-ylidene)amino)-N-(4-methoxyphenyl)benzamide 13d.** Obtained using **general procedure D**. Purified by normal-phase chromatography (0-10% MeOH/CH<sub>2</sub>Cl<sub>2</sub>) to yield the benzamidine, **13d** (20mg, 23%) as a pale-yellow waxy solid. <sup>1</sup>H NMR (400 MHz, Chloroform-*d*) δ 10.97 (s, 1H), 8.24 (dd, *J* = 8.0, 1.7 Hz, 1H), 7.53 (d, *J* = 8.5 Hz, 2H), 7.36 – 7.29 (m, 1H), 7.09 (t, *J* = 7.6 Hz, 1H), 6.88 (d, *J* = 8.7 Hz, 2H), 6.67 (d, *J* = 7.9 Hz, 1H), 3.79 (d, *J* = 1.3 Hz, 3H), 3.46 – 3.35 (m, 3H), 3.27 – 3.21 (m, 1H), 3.19 (s, 3H), 2.63 (dt, *J* = 11.9, 5.7 Hz, 1H), 2.52 (s, 3H), 1.75 (h, *J* = 6.8 Hz, 1H), 0.77 (d, *J* = 6.7 Hz, 3H), 0.65 (d, *J* = 6.8 Hz, 3H). <sup>13</sup>C NMR (101 MHz, CDCl<sub>3</sub>) δ 165.0, 161.0, 156.1, 148.6, 132.0, 131.7, 131.3, 125.9, 122.6, 122.3, 122.0, 114.3, 64.0, 55.6, 48.3, 47.7, 44.9, 37.6, 32.5, 20.0, 19.3. HRMS (ESI): Calculated for C<sub>23</sub>H<sub>30</sub>N<sub>4</sub>O<sub>2</sub> (M<sup>+</sup>+H): 395.24415; Found: 395.24443.

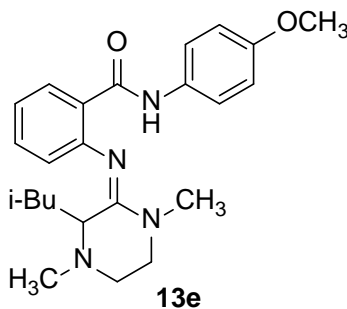

**(E)-2-((3-isobutyl-1,4-dimethylpiperazin-2-ylidene)amino)-N-(4-methoxyphenyl)benzamide**

**13e.** Obtained using **general procedure D**. Purified by normal-phase chromatography (0-20% EtOAc/CH<sub>2</sub>Cl<sub>2</sub>) to yield the benzamidine, **13e** (26 mg, 39%) as a light-brown solid. m.p.: 109-111°C. <sup>1</sup>H NMR (400 MHz, Chloroform-d) δ 10.68 (s, 1H), 8.25 (dd, J = 8.0, 1.7 Hz, 1H), 7.62 – 7.50 (m, 2H), 7.34 (td, J = 7.6, 1.7 Hz, 1H), 7.19 – 7.06 (m, 1H), 6.94 – 6.85 (m, 2H), 6.76 – 6.64 (m, 1H), 3.80 (s, 3H), 3.61 (ddd, J = 12.4, 8.8, 4.4 Hz, 2H), 3.38 (ddd, J = 14.0, 11.6, 5.3 Hz, 1H), 3.18 (s, 3H), 3.11 (ddd, J = 12.1, 5.4, 1.7 Hz, 1H), 2.69 (dd, J = 14.3, 5.1 Hz, 1H), 2.50 (s, 3H), 1.56 (ddd, J = 14.0, 10.6, 3.7 Hz, 1H), 1.47 (dq, J = 10.4, 6.6, 3.9 Hz, 1H), 0.92 (ddd, J = 13.5, 9.7, 3.5 Hz, 1H), 0.65 (d, J = 6.7 Hz, 3H), 0.28 (d, J = 6.5 Hz, 3H). <sup>13</sup>C NMR (101 MHz, CDCl<sub>3</sub>) δ 164.6, 162.2, 155.9, 148.5, 132.1, 131.7, 131.3, 125.6, 123.0, 122.5, 121.6, 114.2, 77.4, 77.0, 76.7, 56.8, 55.5, 44.7, 43.4, 42.1, 39.9, 37.3, 24.4, 23.3, 20.2. HRMS (ESI): Calculated for C<sub>24</sub>H<sub>32</sub>N<sub>4</sub>O<sub>2</sub> (M<sup>+</sup>+H): 409.25980; Found: 409.25931.

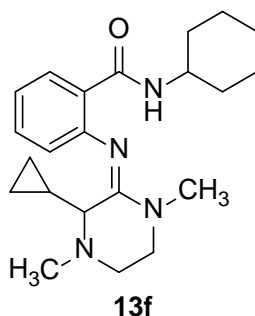

**(E)-N-cyclohexyl-2-((3-cyclopropyl-1,4-dimethylpiperazin-2-ylidene)amino)benzamide** **13f.**

Obtained using **general procedure D**. Purified by normal-phase chromatography (0-5% MeOH/CH<sub>2</sub>Cl<sub>2</sub>) to yield amidine **13f** (17.5 mg, 65%) as a pale-yellow gum. <sup>1</sup>H NMR (400 MHz, Chloroform-d) δ 8.62 (d, J = 8.1 Hz, 1H), 8.18 (dt, J = 7.9, 1.5 Hz, 1H), 7.28 – 7.21 (m, 1H), 7.09 – 7.01 (m, 1H), 6.56 (d, J = 7.8 Hz, 1H), 3.96 (dtt, J = 11.2, 7.8, 4.1 Hz, 1H), 3.58 – 3.44 (m, 2H), 3.30 (dd, J = 10.3, 4.2 Hz, 1H), 3.09 (s, 3H), 2.92 (d, J = 8.6 Hz, 1H), 2.76 (dd, J = 11.8, 4.6 Hz, 1H), 2.46 (s, 3H), 1.98 (d, J = 12.9 Hz, 2H), 1.78 – 1.62 (m, 4H), 1.41 (qd, J = 12.5, 6.0 Hz, 3H), 1.23 – 1.06 (m, 3H), 0.90 (ddt, J = 13.8, 8.8, 4.3 Hz, 1H), 0.40 (td, J = 8.7, 4.5 Hz, 1H), 0.28 (tt, J = 8.6, 5.4 Hz, 1H). <sup>13</sup>C NMR (101 MHz, CDCl<sub>3</sub>) δ 165.8, 160.4, 148.9, 131.3, 131.1, 126.4, 122.6, 122.3, 62.1, 48.3, 47.4, 45.5, 42.3, 37.3, 33.8, 33.7, 25.9, 25.2, 25.2, 11.6, 4.1, 3.7, 1.2. HRMS (ESI): Calculated for C<sub>22</sub>H<sub>32</sub>N<sub>4</sub>O (M<sup>+</sup>+H): 369.26489; Found: 369.26570.

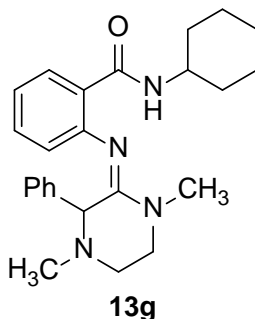

**(E)-N-cyclohexyl-2-((1,4-dimethyl-3-phenylpiperazin-2-ylidene)amino)benzamide** **13g.**

Obtained using **general procedure D**. Purified by normal-phase chromatography (0-10% MeOH/CH<sub>2</sub>Cl<sub>2</sub>) to yield benzamidine, **13g** (38mg, 70%) as a pale-yellow gum. <sup>1</sup>H NMR (500 MHz, CDCl<sub>3</sub>) δ 8.36 (d, J = 7.7 Hz, 1H), 7.88 (dd, J = 7.9, 1.5 Hz, 1H), 7.18 (t, J = 7.4 Hz, 1H), 7.11 (t, J = 7.5 Hz, 2H), 7.08 – 7.03 (m, 1H), 6.93 – 6.89 (m, 1H), 6.85 (d, J = 7.2 Hz, 2H), 6.37 (d, J = 7.7 Hz, 1H), 4.41 (s, 1H), 3.86-3.83 (m, 1H), 3.57 – 3.51 (m, 2H), 3.24 (s, 3H), 3.03 – 2.95 (m, 1H), 2.62-

2.58 (m, 1H), 2.16 (s, 3H), 2.05 – 1.94 (m, 2H), 1.80 – 1.69 (m, 2H), 1.68-1.584 (m, 1H), 1.46 – 1.34 (m, 2H), 1.23 – 1.11 (m, 3H).  $^{13}\text{C}$  NMR (126 MHz,  $\text{CDCl}_3$ )  $\delta$  165.3, 165.2, 157.6, 148.1, 135.7, 130.8, 130.6, 129.3, 128.0, 127.9, 125.5, 123.2, 122.1, 65.3, 49.1, 48.3, 46.6, 42.1, 37.4, 33.7, 33.7, 25.9, 25.2, 25.2. HRMS (ESI): Calculated for  $\text{C}_{25}\text{H}_{32}\text{N}_4\text{O}$  ( $\text{M}^+\text{+H}$ ): 405.26489; Found: 405.26680.

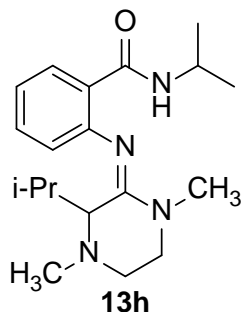

**(E)-N-isopropyl-2-((3-isopropyl-1,4-dimethylpiperazin-2-ylidene)amino)benzamide 13h.**

Obtained using **general procedure D**. Purified by normal-phase chromatography (0-5%  $\text{MeOH}/\text{CH}_2\text{Cl}_2$ ) to yield the benzamidine, **13h** (11 mg, 52%) as a pale-yellow oil.  $^1\text{H}$  NMR (500 MHz,  $\text{Chloroform-}d$ )  $\delta$  8.94 (d,  $J = 7.6$  Hz, 1H), 8.18 (dd,  $J = 7.9, 1.6$  Hz, 1H), 7.28 (dd,  $J = 7.5, 1.7$  Hz, 1H), 7.06 – 7.02 (m, 1H), 6.60 (dd,  $J = 7.9, 1.2$  Hz, 1H), 4.31 – 4.22 (m, 1H), 3.48 – 3.41 (m, 2H), 3.36 (ddd,  $J = 12.2, 7.0, 4.6$  Hz, 1H), 3.24 (ddd,  $J = 11.8, 7.0, 4.4$  Hz, 1H), 3.13 (s, 3H), 2.64 (ddd,  $J = 12.0, 6.7, 4.7$  Hz, 1H), 2.50 (s, 3H), 1.72 (h,  $J = 6.7$  Hz, 1H), 1.22 (d,  $J = 6.5$  Hz, 6H), 0.80 (d,  $J = 6.7$  Hz, 3H), 0.64 (d,  $J = 6.8$  Hz, 3H).  $^{13}\text{C}$  NMR (126 MHz,  $\text{CDCl}_3$ )  $\delta$  166.0, 160.5, 148.6, 131.3, 131.2, 125.8, 122.4, 122.1, 64.0, 48.8, 47.9, 45.1, 41.3, 37.3, 32.5, 23.3, 23.2, 20.2, 19.3. HRMS (ESI): Calculated for  $\text{C}_{19}\text{H}_{30}\text{N}_4\text{O}$  ( $\text{M}^+\text{+H}$ ): 331.24924; Found: 331.24986.

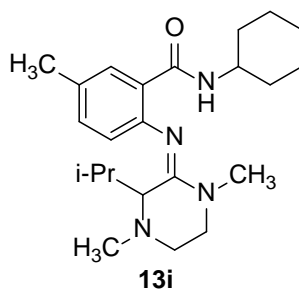

**(E)-N-cyclohexyl-2-((3-isopropyl-1,4-dimethylpiperazin-2-ylidene)amino)-5-methylbenzamide 13i.**

Obtained using **general procedure D**. Purified by normal-phase chromatography (0-5%  $\text{MeOH}/\text{CH}_2\text{Cl}_2$ ) to yield the benzamidine, **13d** (41 mg, 64%) as a pale-yellow oil.  $^1\text{H}$  NMR (400 MHz,  $\text{Chloroform-}d$ )  $\delta$  8.90 (d,  $J = 8.1$  Hz, 1H), 7.96 (d,  $J = 2.2$  Hz, 1H), 7.06 (dd,  $J = 8.0, 2.2$  Hz, 1H), 6.49 (d,  $J = 8.0$  Hz, 1H), 3.93 (tdt,  $J = 11.4, 7.8, 3.9$  Hz, 1H), 3.48 – 3.36 (m, 2H), 3.34 (ddd,  $J = 12.0, 7.0, 4.6$  Hz, 1H), 3.22 (ddd,  $J = 11.8, 7.0, 4.5$  Hz, 1H), 3.09 (s, 3H), 2.62 (ddd,  $J = 11.9, 6.6, 4.7$  Hz, 1H), 2.48 (s, 3H), 2.30 (s, 3H), 2.07 – 1.94 (m, 3H), 1.73 (ddt,  $J = 11.9, 8.0, 4.5$  Hz, 2H), 1.71 – 1.58 (m, 1H), 1.38 (tdt,  $J = 16.5, 12.1, 3.8$  Hz, 2H), 1.13 (qdt,  $J = 10.6, 6.7, 3.2$  Hz, 3H), 0.79 (d,  $J = 6.7$  Hz, 3H), 0.63 (d,  $J = 6.9$  Hz, 3H).  $^{13}\text{C}$  NMR (101 MHz,  $\text{CDCl}_3$ )  $\delta$  166.1, 160.6, 146.0, 131.9, 131.5, 125.5, 122.3, 64.0, 48.7, 48.5, 47.9, 45.0, 37.4, 33.8, 33.8, 32.5, 25.9, 25.3, 20.8, 20.1, 19.3. HRMS (ESI): Calculated for  $\text{C}_{23}\text{H}_{36}\text{N}_4\text{O}$  ( $\text{M}^+\text{+H}$ ): 385.29619; Found: 385.29605.

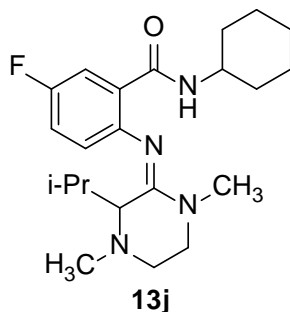

**(E)-N-cyclohexyl-5-fluoro-2-((3-isopropyl-1,4-dimethylpiperazin-2-ylidene)amino)benzamide**

**13j.** Obtained using **general procedure D**. Purified by normal-phase chromatography (0-5% MeOH/CH<sub>2</sub>Cl<sub>2</sub>) to yield the benzamidine, **13j** (8 mg, 40%) as a pale-yellow gum. <sup>1</sup>H NMR (400 MHz, CDCl<sub>3</sub>) δ 8.99 (d, J = 7.4 Hz, 1H), 7.90 (dd, J = 10.1, 2.9 Hz, 1H), 6.99 (td, J = 8.4, 3.1 Hz, 1H), 6.56 (dd, J = 8.6, 4.9 Hz, 1H), 4.03 – 3.87 (m, 1H), 3.48-3.46 (m, 1H), 3.41 – 3.31 (m, 2H), 3.28-3.22 (m, 1H), 3.13 (s, 3H), 2.70 – 2.60 (m, 1H), 2.50 (s, 3H), 2.10 – 1.95 (m, 2H), 1.80 – 1.59 (m, 4H), 1.51 – 1.35 (m, 2H), 1.24-1.18 (m, 3H), 0.81 (d, J = 6.7 Hz, 3H), 0.65 (d, J = 6.8 Hz, 3H). <sup>19</sup>F NMR (376 MHz, CDCl<sub>3</sub>) δ -122.09. <sup>13</sup>C NMR (101 MHz, CDCl<sub>3</sub>) δ 164.6, 164.6, 160.9, 159.6, 157.2, 149.9, 127.1, 127.1, 123.5, 123.4, 118.1, 117.8, 117.3, 117.1, 63.9, 48.7, 48.6, 47.8, 45.1, 37.3, 33.7, 33.6, 32.5, 25.8, 25.2, 20.0, 19.1. HRMS (ESI): Calculated for C<sub>22</sub>H<sub>33</sub>FN<sub>4</sub>O (M<sup>+</sup>+H): 389.27112; Found: 389.27059.

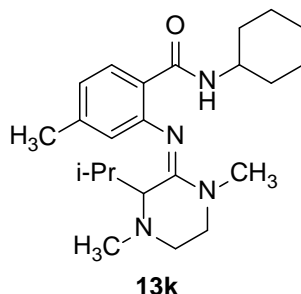

**(E)-N-cyclohexyl-2-((3-isopropyl-1,4-dimethylpiperazin-2-ylidene)amino)-4-methylbenzamide**

**13k.** Obtained using **general procedure D**. Purified by normal-phase chromatography (0-5% MeOH/CH<sub>2</sub>Cl<sub>2</sub>) to yield the benzamidine, **13k** (30 mg, 61%) as a pale-yellow gum. <sup>1</sup>H NMR (400 MHz, Chloroform-*d*) δ 8.84 (d, J = 8.0 Hz, 1H), 8.06 (d, J = 8.0 Hz, 1H), 6.84 (d, J = 8.0 Hz, 1H), 6.39 (s, 1H), 3.94 (dtd, J = 11.3, 7.6, 4.1 Hz, 1H), 3.49 – 3.30 (m, 3H), 3.23 (ddd, J = 11.8, 6.9, 4.5 Hz, 1H), 3.10 (s, 3H), 2.63 (ddd, J = 12.0, 6.7, 4.7 Hz, 1H), 2.50 (s, 3H), 2.29 (s, 3H), 2.01 (tt, J = 8.4, 3.8 Hz, 2H), 1.78 – 1.59 (m, 4H), 1.46 – 1.31 (m, 2H), 1.21 – 1.06 (m, 3H), 0.80 (d, J = 6.7 Hz, 3H), 0.64 (d, J = 6.8 Hz, 3H). <sup>13</sup>C NMR (101 MHz, CDCl<sub>3</sub>) δ 166.0, 160.5, 148.4, 141.3, 131.3, 123.3, 123.1, 123.0, 64.1, 48.8, 48.4, 47.9, 45.01, 37.4, 33.9, 33.8, 32.6, 25.9, 25.3, 21.4, 20.1, 19.4. HRMS (ESI): Calculated for C<sub>23</sub>H<sub>36</sub>N<sub>4</sub>O (M<sup>+</sup>+H): 385.29619; Found: 385.29585.



## 1.7 General procedure E: Representative Procedure for the Telescoped Synthesis of Benzamidines:

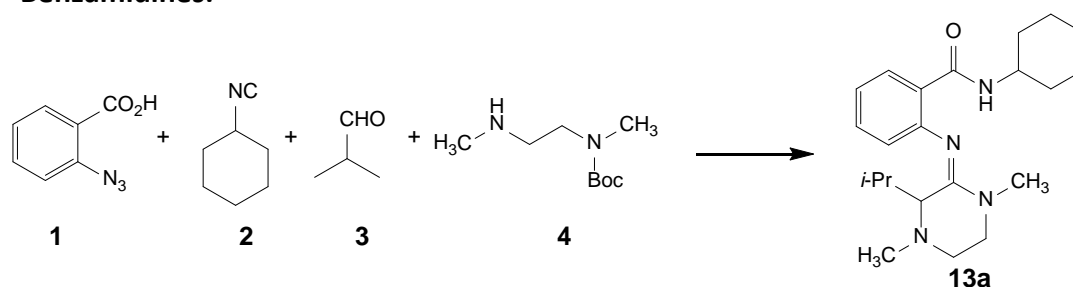

**(E)-N-cyclohexyl-2-((3-isopropyl-1,4-dimethylpiperazin-2-ylidene)amino)benzamide 13a.** An oven-dried, 10 mL round bottom flask under nitrogen was charged with activated, powdered, 4 Å molecular sieves (50 mg). The flask was placed under vacuum and flame-dried, then backfilled with nitrogen. Diamine **4** (115 mg, 0.61 mmol, 2.0 equiv.) was dissolved in dry CH<sub>2</sub>Cl<sub>2</sub> (0.5 mL, 1.3 M) and added to the reaction vessel. Aldehyde **3** (112 µL, 1.2 mmol, 4.0 equiv.) was dissolved in dry CH<sub>2</sub>Cl<sub>2</sub> (0.46 mL, 2.6 M) in a 1-dram glass vial and added dropwise over 1 min via syringe to the reaction vessel while stirring at rt. Upon completion of the addition, carboxylic acid **1** (50 mg, 0.31 mmol, 1.0 equiv.) was dissolved in a 3:1 mixture of dry CH<sub>2</sub>Cl<sub>2</sub>/MeOH (0.4 mL, .8 M), taken up into a syringe and the needle was placed into the septum of the reaction vessel. Isocyanide **2** (153 µL, 1.2 mmol, 4.0 equiv.) was dissolved in dry CH<sub>2</sub>Cl<sub>2</sub> (0.3 mL, 3.6 M) in a 1-dram glass vial, taken up into a syringe and the needle was placed into the septum of the reaction vessel. Carboxylic acid **1** was added dropwise to the reaction vessel while stirring over 1 min followed immediately by isocyanide **2**. The reaction mixture was stirred at rt for 12 h after which the reaction was complete as judged by complete consumption of carboxylic acid **1** on TLC (10% MeOH/CH<sub>2</sub>Cl<sub>2</sub>). The crude reaction mixture was filtered through a 0.45 µm syringe filter and the filtrate was concentrated *in vacuo*. To a flame-dried, 10 mL round bottom flask under nitrogen was added triphenylphosphine on resin (438 mg, 0.61 mmol, 1.4 meq/g, 2.0 equiv.) followed by dry toluene (1.0 mL). A solution of the crude reaction mixture in dry toluene (2.0 mL) was added dropwise and the reaction mixture was stirred at rt for 1 h. After 1 h at rt, the reaction mixture was heated to 110 °C and stirred for 12 h at reflux after which the reaction was complete as judged by complete consumption of the intermediate by TLC (30% EtOAc/hexanes). The crude reaction mixture was filtered through a pad of celite, rinsed with CH<sub>2</sub>Cl<sub>2</sub> (10 mL x 5), and the filtrate was concentrated *in vacuo*. To a flame-dried, 10 mL round bottom flask under nitrogen was dissolved the crude reaction mixture in dry CH<sub>2</sub>Cl<sub>2</sub> (3.0 mL, 0.1 M) and the solution cooled to 0 °C in an ice-bath while stirring for 20 min. HCl in dioxane (4.0 M, 0.8 mL, 10.0 equiv.) was added dropwise. The reaction mixture was allowed to slowly warm to rt. The reaction mixture was stirred at rt for 12h after which the reaction was complete as judged by complete consumption of intermediate on TLC (30% EtOAc/hexanes). The reaction mixture was dried *in vacuo*. Triethylamine (0.4 mL, 3.1 mmol, 10.0 equiv.) was added to a solution of the crude reaction mixture in MeOH (3.1 mL, 0.1 M) in a 10 mL microwave vial and the reaction mixture was heated in a microwave reactor at 100 °C for 1 h. The reaction mixture was allowed to cool to rt and the solvent was removed *in vacuo*. The crude mixture was dissolved in CH<sub>2</sub>Cl<sub>2</sub> (10 mL) and washed with water (10 mL), then saturated brine solution (10 mL). The organic layer was dried over MgSO<sub>4</sub>, filtered and concentrated *in vacuo*. The crude residue was purified by normal-phase chromatography (0-60% EtOAc/Hex) to yield the benzamidine, **13a** (69 mg, 61%) as a pale-yellow oil.

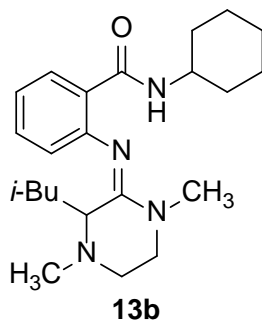

**(E)-N-cyclohexyl-2-((3-isobutyl-1,4-dimethylpiperazin-2-ylidene)amino)benzamide** **13b**. Obtained using **general procedure E**. Purified by normal-phase chromatography (0-50% EtOAc/hexane) to yield the benzamidine, **13b** (71 mg, 60%) as pale-yellow gum.

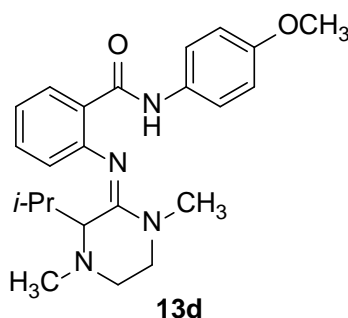

**(E)-2-((3-isopropyl-1,4-dimethylpiperazin-2-ylidene)amino)-N-(4-methoxyphenyl)benzamide** **13d**. Obtained using **general procedure E**. Purified by normal-phase chromatography (0-20% EtOAc/CH<sub>2</sub>Cl<sub>2</sub>) to yield the benzamidine, **13d** (120mg, 40%) as a pale-yellow waxy solid.

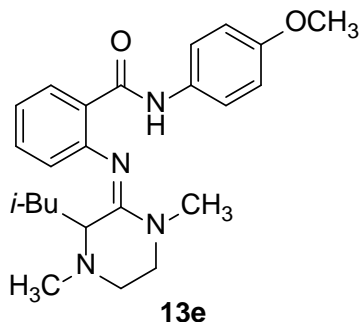

**(E)-2-((3-isobutyl-1,4-dimethylpiperazin-2-ylidene)amino)-N-(4-methoxyphenyl)benzamide** **13e**. Obtained using **general procedure E**. Purified by normal-phase chromatography (0-20% EtOAc/CH<sub>2</sub>Cl<sub>2</sub>) to yield the benzamidine, **13e** (56 mg, 45%) as a light-brown solid .

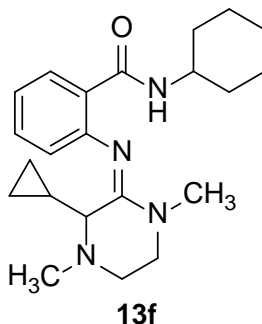

**(*E*)-*N*-cyclohexyl-2-((3-cyclopropyl-1,4-dimethylpiperazin-2-ylidene)amino)benzamide 13f.**

Obtained using **general procedure E**. Purified by normal-phase chromatography (1-5% MeOH/EtOAc) to yield the benzamidine, **13f** (80 mg, 70%) as pale-yellow gum.

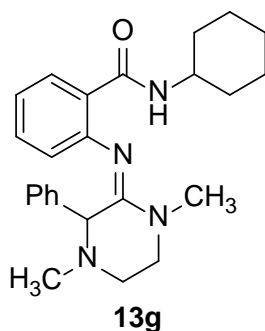

**(*E*)-*N*-cyclohexyl-2-((1,4-dimethyl-3-phenylpiperazin-2-ylidene)amino)benzamide 13g.**

Obtained using **general procedure E**. Purified by normal-phase chromatography (0-5% MeOH/EtOAc) to yield the benzamidine, **13g** (85 mg, 68%) as a pale-yellow oil.

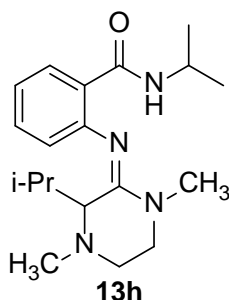

**(*E*)-*N*-isopropyl-2-((3-isopropyl-1,4-dimethylpiperazin-2-ylidene)amino)benzamide 13h.**

Obtained using **general procedure E**. Purified by normal-phase chromatography (0-20% EtOAc/CH<sub>2</sub>Cl<sub>2</sub>) to yield the benzamidine, **13h** (51 mg, 50%) as a pale-yellow oil.

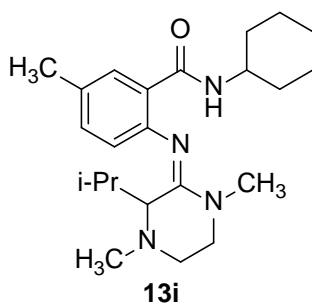

**(*E*)-*N*-cyclohexyl-2-((3-isopropyl-1,4-dimethylpiperazin-2-ylidene)amino)-5-methylbenzamide**

**13i.** Obtained using **general procedure E**. Purified by normal-phase chromatography (0-40% EtOAc/hexane) to yield the benzamidine, **13i** (53 mg, 45%) as a pale-yellow gum.

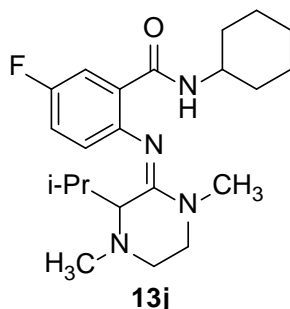

**(E)-N-cyclohexyl-5-fluoro-2-((3-isopropyl-1,4-dimethylpiperazin-2-ylidene)amino)benzamide**  
**13j.** Obtained using **general procedure E**. Purified by normal-phase chromatography (0-40% EtOAc/hexane) to yield the benzamidine, **13j** (67 mg, 56%) as a pale-yellow gum.

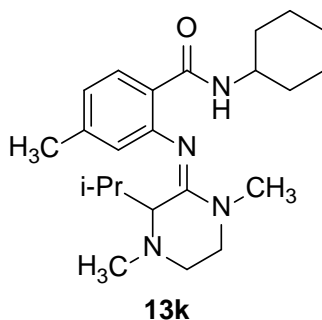

**(E)-N-cyclohexyl-2-((3-isopropyl-1,4-dimethylpiperazin-2-ylidene)amino)-4-methylbenzamide**  
**13k.** Obtained using **general procedure E**. Purified by normal-phase chromatography (0-50% EtOAc/hexane) to yield the benzamidine, **13k** (53 mg, 45%) as a pale-yellow gum.

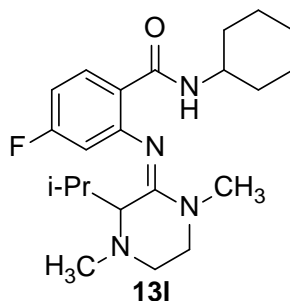

**(E)-N-cyclohexyl-4-fluoro-2-((3-isopropyl-1,4-dimethylpiperazin-2-ylidene)amino)benzamide**  
**13l.** Obtained using **general procedure E**. Purified by normal-phase chromatography (0-40% EtOAc/hexane) to yield the benzamidine, **13l** (25mg, 21%) as a pale-yellow gum.  $^1\text{H}$  NMR (400 MHz, Chloroform-*d*)  $\delta$  8.81 (d,  $J$  = 8.0 Hz, 1H), 8.19 (dd,  $J$  = 8.8, 7.1 Hz, 1H), 6.73 (td,  $J$  = 8.4, 2.5 Hz, 1H), 6.30 (dd,  $J$  = 10.3, 2.5 Hz, 1H), 3.94 (tdt,  $J$  = 11.5, 7.9, 3.9 Hz, 1H), 3.52 – 3.42 (m, 2H), 3.37 (ddd,  $J$  = 12.3, 6.8, 4.7 Hz, 1H), 3.24 (ddd,  $J$  = 11.7, 6.8, 4.5 Hz, 1H), 3.13 (s, 3H), 2.65 (ddd,  $J$  = 12.0, 6.8, 4.7 Hz, 1H), 2.52 (s, 3H), 2.02 (dt,  $J$  = 11.8, 4.1 Hz, 2H), 1.70 (ddt,  $J$  = 29.4, 14.9, 5.2 Hz, 5H), 1.40 (qd,  $J$  = 12.5, 3.3 Hz, 2H), 1.22 – 1.06 (m, 3H), 0.82 (d,  $J$  = 6.7 Hz, 3H), 0.68 (d,  $J$  = 6.9 Hz, 3H).  $^{19}\text{F}$  NMR (376 MHz,  $\text{CDCl}_3$ )  $\delta$  -109.97.  $^{13}\text{C}$  NMR (101 MHz,  $\text{CDCl}_3$ )  $\delta$  165.2, 165.0, 162.7, 160.8, 150.5, 150.4, 133.5, 133.4, 122.2, 122.2, 108.9, 108.7, 108.6, 108.4, 63.8, 48.6, 48.4, 47.7, 45.1, 37.3, 33.8, 33.7, 32.5, 29.7, 25.8, 25.2, 20.1, 19.1. HRMS (ESI): Calculated for  $\text{C}_{22}\text{H}_{33}\text{FN}_4\text{O}$  ( $\text{M}^+ + \text{H}$ ): 389.27116; Found: 389.27155.

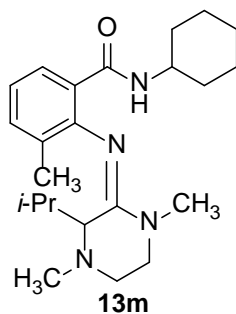

**(E)-N-cyclohexyl-2-((3-isopropyl-1,4-dimethylpiperazin-2-ylidene)amino)-3-methylbenzamide**  
**13m.** Obtained using **general procedure E**. Purified by normal phase chromatography (0-30% EtOAc/CH<sub>2</sub>Cl<sub>2</sub>) to yield the benzamidine, **13m** (41 mg, 35%) as a pale-yellow oil. <sup>1</sup>H NMR (400 MHz, Chloroform-*d*) δ 8.66 (d, *J* = 7.9 Hz, 1H), 8.04 (dd, *J* = 7.9, 1.6 Hz, 1H), 7.23 (dd, *J* = 7.4, 1.5 Hz, 1H), 6.97 (t, *J* = 7.6 Hz, 1H), 3.92 (dtt, *J* = 11.6, 8.0, 4.0 Hz, 1H), 3.60 (ddd, *J* = 12.6, 9.6, 3.2 Hz, 1H), 3.20 (s, 4H), 3.13 (s, 1H), 3.05 (ddd, *J* = 15.4, 8.6, 3.7 Hz, 1H), 2.94 (d, *J* = 3.0 Hz, 1H), 2.62 (ddd, *J* = 11.4, 9.6, 3.6 Hz, 1H), 2.38 (s, 3H), 2.11 (d, *J* = 3.8 Hz, 4H), 2.07 – 1.94 (m, 1H), 1.72 (tdd, *J* = 12.8, 8.1, 5.1 Hz, 1H), 1.63 (qd, *J* = 7.0, 3.0 Hz, 1H), 1.49 – 1.30 (m, 2H), 1.14 (tddd, *J* = 11.6, 8.7, 6.3, 3.8 Hz, 3H), 0.83 (d, *J* = 6.9 Hz, 3H), 0.67 (d, *J* = 6.9 Hz, 4H). <sup>13</sup>C NMR (101 MHz, CDCl<sub>3</sub>) δ 166.1, 160.5, 147.5, 133.2, 129.1, 127.8, 126.0, 121.6, 65.8, 51.5, 49.0, 48.4, 47.4, 37.2, 33.8, 33.7, 32.8, 25.8, 25.3, 25.2, 21.2, 19.2, 17.6. HRMS (ESI): Calculated for C<sub>22</sub>H<sub>33</sub>FN<sub>4</sub>O (M<sup>+</sup>+H): 389.27112; Found: 389.27196.

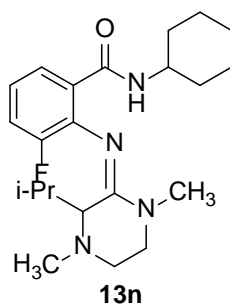

**(E)-N-cyclohexyl-3-fluoro-2-((3-isopropyl-1,4-dimethylpiperazin-2-ylidene)amino)benzamide**  
**13n.** Obtained using **general procedure E**. Purified by normal-phase chromatography (0-15% EtOAc/CH<sub>2</sub>Cl<sub>2</sub>) to yield the benzamidine, **13n** (65 mg, 42%) as a pale-yellow gum. <sup>1</sup>H NMR (400 MHz, Chloroform-*d*) δ 9.00 (s, 1H), 7.99 (d, *J* = 7.9 Hz, 1H), 7.10 (ddd, *J* = 10.1, 8.0, 1.6 Hz, 1H), 6.94 (td, *J* = 8.0, 5.1 Hz, 1H), 3.94 (tdt, *J* = 11.4, 7.8, 3.8 Hz, 1H), 3.51 (ddd, *J* = 12.1, 8.0, 3.8 Hz, 1H), 3.33 (ddd, *J* = 12.6, 5.9, 4.1 Hz, 1H), 3.19 (s, 3H), 3.12 (t, *J* = 3.2 Hz, 2H), 2.66 (ddd, *J* = 12.1, 8.0, 4.1 Hz, 1H), 2.45 (s, 3H), 2.07 – 1.97 (m, 2H), 1.77 – 1.61 (m, 4H), 1.46 – 1.34 (m, 2H), 1.16 (dddd, *J* = 12.4, 8.6, 6.8, 2.7 Hz, 3H), 0.82 (d, *J* = 6.8 Hz, 3H), 0.70 (d, *J* = 6.9 Hz, 3H). <sup>19</sup>F NMR (376 MHz, CDCl<sub>3</sub>) δ -127.01. <sup>13</sup>C NMR (101 MHz, CDCl<sub>3</sub>) δ 165.1, 162.9, 153.8, 151.4, 137.2, 137.1, 127.9, 126.7, 121.4, 121.4, 118.0, 117.8, 66.0, 49.9, 48.6, 48.3, 46.0, 37.5, 33.8, 33.7, 33.6, 29.8, 25.9, 25.3, 20.6, 18.7. HRMS (ESI): Calculated for C<sub>22</sub>H<sub>33</sub>FN<sub>4</sub>O (M<sup>+</sup>+H): 389.27112; Found: 389.27196.

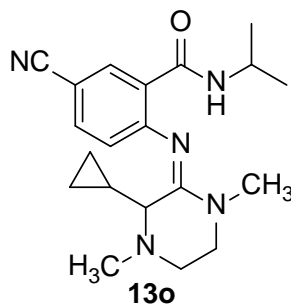

**(E)-5-cyano-2-((3-cyclopropyl-1,4-dimethylpiperazin-2-ylidene)amino)-N-isopropylbenzamide 13o.** Obtained using **general procedure E**. Purified by normal-phase chromatography (0-15% MeOH/EtOAc) to yield the benzamidine, **13o** (48 mg, 44%) as a light-brown solid. m.p.: 147-148°C. <sup>1</sup>H NMR (400 MHz, Chloroform-*d*) δ 8.61 (d, *J* = 7.7 Hz, 1H), 8.52 (d, *J* = 2.1 Hz, 1H), 7.50 (dd, *J* = 8.2, 2.1 Hz, 1H), 6.62 (d, *J* = 8.2 Hz, 1H), 4.32 – 4.18 (m, 1H), 3.58 (td, *J* = 11.0, 5.5 Hz, 1H), 3.45 (ddd, *J* = 12.8, 10.4, 5.1 Hz, 1H), 3.35 (ddd, *J* = 11.7, 5.1, 2.4 Hz, 1H), 3.13 (s, 3H), 2.93 (d, *J* = 8.4 Hz, 1H), 2.79 (ddd, *J* = 13.2, 5.7, 2.3 Hz, 1H), 2.46 (s, 3H), 1.23 (d, *J* = 6.6 Hz, 3H), 1.20 (d, *J* = 6.5 Hz, 3H), 0.89 (dtd, *J* = 13.3, 8.3, 5.0 Hz, 1H), 0.51 – 0.40 (m, 1H), 0.36 – 0.25 (m, 1H), 0.14 (dq, *J* = 10.5, 5.2 Hz, 1H), -0.48 (dq, *J* = 10.3, 5.2 Hz, 1H). <sup>13</sup>C NMR (101 MHz, CDCl<sub>3</sub>) δ 163.8, 160.6, 153.0, 135.7, 134.2, 126.8, 123.3, 119.2, 105.0, 61.9, 47.2, 45.3, 42.3, 41.4, 37.2, 23.1, 23.0, 11.5, 3.9, 3.6. HRMS (ESI): Calculated for C<sub>20</sub>H<sub>27</sub>N<sub>5</sub>O (M<sup>+</sup>+H): 354.22884; Found: 354.22999.

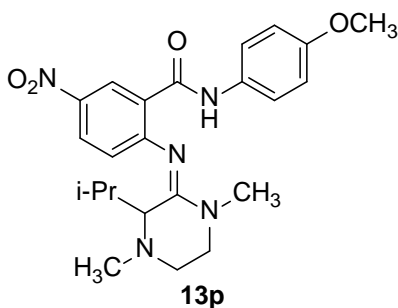

**(E)-2-((3-isopropyl-1,4-dimethylpiperazin-2-ylidene)amino)-N-(4-methoxyphenyl)-5-nitrobenzamide 13p.** Obtained using **general procedure E**. Purified by normal-phase chromatography (0-3% EtOAc/CH<sub>2</sub>Cl<sub>2</sub>) to yield the benzamidine, **13p** (49 mg, 36%) as yellow solid. m.p.: 167-168°C. <sup>1</sup>H NMR (400 MHz, Chloroform-*d*) δ 10.93 (s, 1H), 9.17 (d, *J* = 2.8 Hz, 1H), 8.16 (dd, *J* = 8.8, 2.9 Hz, 1H), 7.59 – 7.46 (m, 2H), 6.97 – 6.84 (m, 2H), 6.71 (d, *J* = 8.8 Hz, 1H), 3.81 (s, 3H), 3.57 – 3.46 (m, 2H), 3.45 (d, *J* = 6.4 Hz, 1H), 3.27 (s, 4H), 2.76 – 2.65 (m, 1H), 2.55 (s, 3H), 1.76 (h, *J* = 6.7 Hz, 1H), 0.80 (d, *J* = 6.7 Hz, 3H), 0.70 (d, *J* = 6.8 Hz, 3H). <sup>13</sup>C NMR (101 MHz, CDCl<sub>3</sub>) δ 162.5, 162.0, 156.3, 154.3, 142.3, 131.3, 127.8, 126.4, 125.7, 122.6, 121.8, 114.3, 64.3, 55.5, 48.0, 47.5, 44.9, 37.8, 32.8, 20.0, 19.1. Calculated for HRMS (ESI): C<sub>23</sub>H<sub>29</sub>N<sub>5</sub>O<sub>4</sub> (M<sup>+</sup>+H): 440.22923; Found: 440.22903.

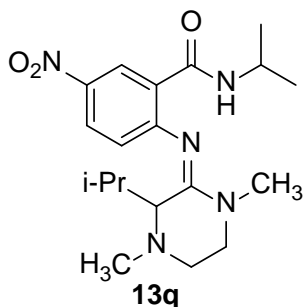

**(E)-N-isopropyl-2-((3-isopropyl-1,4-dimethylpiperazin-2-ylidene)amino)-5-nitrobenzamide**

**13q.** Obtained using **general procedure E**. Purified by normal-phase chromatography (0-7% EtOAc/CH<sub>2</sub>Cl<sub>2</sub>) to yield the benzamidine, **13q** (36 mg, 31%) as a yellow-orange solid. m.p.: 140-141°C. <sup>1</sup>H NMR (400 MHz, Chloroform-*d*) δ 9.10 (d, *J* = 2.8 Hz, 1H), 8.93 (d, *J* = 7.6 Hz, 1H), 8.12 (dd, *J* = 8.8, 2.9 Hz, 1H), 6.65 (d, *J* = 8.8 Hz, 1H), 4.27 (dq, *J* = 13.2, 6.5 Hz, 1H), 3.53 (ddd, *J* = 11.9, 6.9, 4.5 Hz, 1H), 3.46 (dd, *J* = 6.7, 4.9 Hz, 1H), 3.42 (d, *J* = 6.0 Hz, 1H), 3.25 (ddd, *J* = 12.6, 6.6, 4.5 Hz, 1H), 3.19 (s, 3H), 2.71 (ddd, *J* = 12.1, 6.9, 4.8 Hz, 1H), 2.53 (s, 3H), 1.71 (h, *J* = 6.7 Hz, 1H), 1.23 (dd, *J* = 6.6, 1.4 Hz, 6H), 0.83 (d, *J* = 6.7 Hz, 3H), 0.69 (d, *J* = 6.8 Hz, 3H). <sup>13</sup>C NMR (101 MHz, CDCl<sub>3</sub>) δ 163.7, 161.3, 154.4, 142.0, 127.68, 126.0, 125.6, 122.5, 77.4, 77.0, 76.7, 64.2, 48.5, 47.7, 45.1, 41.6, 37.4, 32.9, 23.02, 23.0, 20.1, 19.0. Calculated for HRMS (ESI): C<sub>19</sub>H<sub>29</sub>N<sub>5</sub>O<sub>3</sub> (M<sup>+</sup>+H): 376.23432; Found: 376.23487.

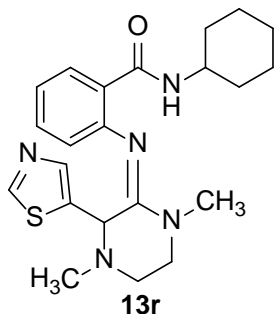

**(E)-N-cyclohexyl-2-((1,4-dimethyl-3-(thiazol-5-yl)piperazin-2-ylidene)amino)benzamide**

**13r.** Obtained using **general procedure E**. Purified by normal-phase chromatography (0.5-3.5% MeOH/CH<sub>2</sub>Cl<sub>2</sub>) to yield the benzamidine, **13r** (76 mg, 60%) as an amber gum. <sup>1</sup>H NMR (400 MHz, Chloroform-*d*) δ 8.70 (s, 1H), 8.05 (d, *J* = 7.9 Hz, 1H), 7.99 (dd, *J* = 7.9, 1.7 Hz, 1H), 7.30 (s, 1H), 7.15 (td, *J* = 7.6, 1.7 Hz, 1H), 7.06 – 6.99 (m, 1H), 6.38 (d, *J* = 7.8 Hz, 1H), 4.86 (s, 1H), 3.87 (dtd, *J* = 10.9, 7.4, 4.0 Hz, 1H), 3.55 (td, *J* = 11.0, 5.1 Hz, 1H), 3.38 (ddd, *J* = 11.5, 4.6, 2.7 Hz, 1H), 3.18 (s, 3H), 2.97 (ddd, *J* = 12.6, 10.6, 4.6 Hz, 1H), 2.64 (ddd, *J* = 12.9, 5.3, 2.4 Hz, 1H), 2.17 (s, 3H), 2.03 – 1.94 (m, 2H), 1.79 – 1.61 (m, 5H), 1.46 – 1.32 (m, 1H), 1.16 (dq, *J* = 14.3, 11.5, 11.0 Hz, 3H). <sup>13</sup>C NMR (101 MHz, CDCl<sub>3</sub>) δ 165.1, 156.3, 153.5, 147.3, 143.9, 131.1, 131.0, 130.9, 125.8, 122.8, 122.6, 56.5, 49.2, 48.4, 45.8, 41.6, 37.3, 33.6, 25.8, 25.1. HRMS (ESI): Calculated for C<sub>22</sub>H<sub>29</sub>N<sub>5</sub>OS (M<sup>+</sup>+H): 412.21656; Found: 412.21798.

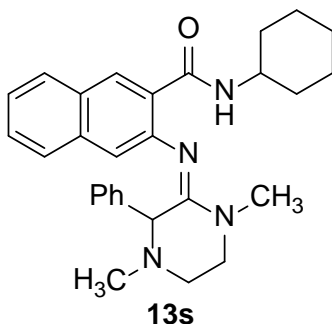

**(E)-N-cyclohexyl-3-((1,4-dimethyl-3-phenylpiperazin-2-ylidene)amino)-2-naphthamide 13s.**

Obtained using **general procedure E**. Purified by normal-phase chromatography (0-20% EtOAc/CH<sub>2</sub>Cl<sub>2</sub>) to yield the naphthamide, **13s** (69 mg, 50%) as apale-yellow gum. <sup>1</sup>H NMR (400 MHz, Chloroform-d) δ 8.68 (d, *J* = 8.0 Hz, 1H), 8.47 (s, 1H), 7.79 (dd, *J* = 8.3, 1.2 Hz, 1H), 7.36 (d, *J* = 3.8 Hz, 2H), 7.29 (dd, *J* = 8.2, 3.9 Hz, 1H), 7.23 – 7.17 (m, 1H), 7.09 (t, *J* = 7.6 Hz, 2H), 6.81 (dd, *J* = 7.9, 1.4 Hz, 2H), 6.66 (s, 1H), 4.51 (s, 1H), 3.90 (tdt, *J* = 11.3, 7.8, 3.9 Hz, 1H), 3.63 – 3.51 (m, 2H), 3.29 (s, 3H), 3.02 (ddd, *J* = 12.5, 8.7, 5.0 Hz, 1H), 2.62 (dt, *J* = 12.5, 4.7 Hz, 1H), 2.14 (s, 3H), 2.10 – 1.98 (m, 2H), 1.84 – 1.57 (m, 2H), 1.53 – 1.35 (m, 2H), 1.28 – 1.13 (m, 4H). <sup>13</sup>C NMR (101 MHz, CDCl<sub>3</sub>) δ 164.9, 157.8, 145.04, 135.7, 134.7, 131.7, 129.3, 129.3, 128.9, 127.9, 127.8, 127.0, 126.1, 126.0, 124.0, 119.1, 64.9, 49.2, 48.4, 46.3, 42.0, 37.4, 33.6, 25.8, 25.2, 25.1. Calculated for HRMS (ESI): C<sub>29</sub>H<sub>34</sub>N<sub>4</sub>O (M<sup>+</sup>+H): 455.28054; Found: 455.28019.

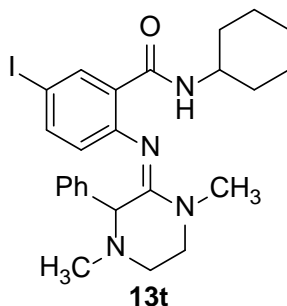

**(E)-N-cyclohexyl-2-((1,4-dimethyl-3-phenylpiperazin-2-ylidene)amino)-5-iodobenzamide 13t.**

Obtained using **general procedure E**. Purified by normal-phase chromatography (0-15% EtOAc/CH<sub>2</sub>Cl<sub>2</sub>) to yield benzamidine **13t** (144mg, 88%) as pale yellow oil. Recrystallized from acetonitrile to form clear colorless crystal (See Crystallographic Experimental Section). m.p.: 85-87°C. <sup>1</sup>H NMR (400 MHz, Chloroform-*d*) δ 8.27 (d, *J* = 7.9 Hz, 1H), 8.15 (d, *J* = 2.2 Hz, 1H), 7.32 (dd, *J* = 8.3, 2.3 Hz, 1H), 7.24 – 7.18 (m, 1H), 7.14 (d, *J* = 7.6 Hz, 2H), 7.13 (d, *J* = 8.6 Hz, 0H), 6.85 (d, *J* = 6.9 Hz, 1H), 6.12 (d, *J* = 8.3 Hz, 1H), 4.33 (s, 1H), 3.80 (dtd, *J* = 10.9, 7.3, 3.9 Hz, 1H), 3.64 – 3.42 (m, 2H), 3.22 (s, 3H), 2.98 (ddd, *J* = 12.7, 7.6, 5.2 Hz, 1H), 2.59 (dt, *J* = 12.5, 5.0 Hz, 1H), 2.15 (s, 3H), 2.04 – 1.88 (m, 2H), 1.80 – 1.61 (m, 2H), 1.48 – 1.32 (m, 2H), 1.15 (dtdd, *J* = 23.1, 11.8, 7.9, 3.5 Hz, 2H). <sup>13</sup>C NMR (101 MHz, CDCl<sub>3</sub>) δ 163.7, 157.7, 147.9, 139.3, 139.0, 135.4, 129.2, 128.0, 128.0, 127.4, 125.2, 84.9, 65.5, 49.2, 48.3, 46.8, 42.1, 37.3, 33.5, 33.5, 25.8, 25.1, 25.1. Calculated for HRMS (ESI): C<sub>21</sub>H<sub>35</sub>IN<sub>4</sub>O (M<sup>+</sup>+H): 531.16154; Found: 531.16069.



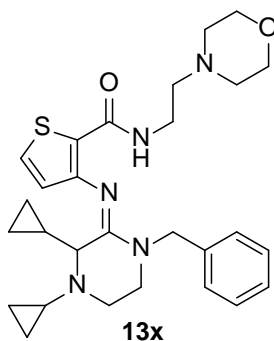

**(*E*)-3-((1-benzyl-3,4-dicyclopropylpiperazin-2-ylidene)amino)-*N*-(2-morpholinoethyl) thiophene-2-carboxamide **13x**.** Obtained using **general procedure E**. Purified by normal-phase chromatography (0-3% MeOH/CH<sub>2</sub>Cl<sub>2</sub>) to yield the thiophene carboxamidine, **13x** (54 mg, 40%) as a pale-yellow gum . (54 mg, 40%). <sup>1</sup>H NMR (400 MHz, Chloroform-*d*) δ 7.70 (t, *J* = 5.9 Hz, 1H), 7.43 – 7.24 (m, 7H), 6.49 (d, *J* = 5.2 Hz, 1H), 5.29 (d, *J* = 15.3 Hz, 1H), 4.40 (d, *J* = 15.3 Hz, 1H), 3.64 – 3.47 (m, 6H), 3.32 (ddd, *J* = 24.2, 11.5, 7.1 Hz, 3H), 3.19 (dq, *J* = 13.0, 6.4 Hz, 1H), 2.97 (q, *J* = 6.2, 5.1 Hz, 1H), 2.39 – 2.16 (m, 7H), 1.11 (dp, *J* = 12.5, 4.3, 3.7 Hz, 1H), 0.62 – 0.26 (m, 5H), 0.16 (dq, *J* = 10.0, 5.1 Hz, 1H), -0.30 (dq, *J* = 10.2, 5.1 Hz, 1H). <sup>13</sup>C NMR (101 MHz, CDCl<sub>3</sub>) δ 163.3, 162.3, 149.1, 137.5, 129.0, 127.8, 127.5, 127.1, 124.0, 122.9, 66.9, 62.2, 58.0, 53.5, 51.6, 45.2, 43.6, 36.1, 34.2, 12.3, 7.9, 6.7, 3.9, 3.8. HRMS (ESI): Calculated for C<sub>28</sub>H<sub>37</sub>N<sub>5</sub>O<sub>2</sub> (M<sup>+</sup>+H): 508.274073; Found: 508.27490.

## 1.8 General procedure F: Representative Procedure for the Telescoped Synthesis of $\alpha$ -Unsubstituted Benzamidines:

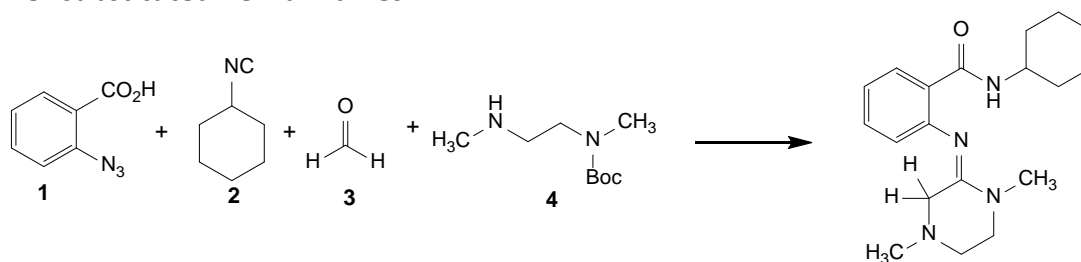

**(E)-N-cyclohexyl-2-((1,4-dimethylpiperazin-2-ylidene)amino)benzamide 13c.** An oven-dried, 10 mL round bottom flask under nitrogen was charged with activated, powdered 4 Å molecular sieves (150 mg). The flask was placed under vacuum and flame-dried, then backfilled with nitrogen. Diamine **4** (115 mg, 0.61 mmol, 2.0 equiv.) was dissolved in dry CH<sub>2</sub>Cl<sub>2</sub> (0.9 mL, 0.7 M) and added to the reaction vessel. Formalin **3** (0.1 mL, 1.2 mmol, 4.0 equiv.) was measured with syringe added dropwise over a minute to the reaction vessel while stirring at rt. Upon completion of the addition, carboxylic acid **1** (50 mg, 0.31 mmol, 1.0 equiv.) was dissolved in a 3:1 mixture of dry CH<sub>2</sub>Cl<sub>2</sub>/HPLC grade MeOH. (0.4 mL, 0.8 M), taken up into a syringe and the needle was placed into the septum of the reaction vessel. Isocyanide **2** (153  $\mu$ L, 1.2 mmol, 4.0 equiv.) was dissolved in dry CH<sub>2</sub>Cl<sub>2</sub> (0.3 mL, 3.6 M) in a 1-dram glass vial, taken up into a syringe and the needle was placed into the septum of the reaction vessel. Carboxylic acid **1** was added dropwise to the reaction vessel while stirring over 1 min followed immediately by isocyanide **2**. The reaction mixture was stirred at rt for 12 h, after which the reaction was complete as judged by complete consumption of carboxylic acid **1** on TLC (10% MeOH/CH<sub>2</sub>Cl<sub>2</sub>). The crude reaction mixture was filtered through a 0.45  $\mu$ m syringe filter and the filtrate was concentrated *in vacuo*. To a flame-dried, 10 mL round bottom flask under nitrogen was added triphenylphosphine on resin (438 mg, 0.61 mmol, 1.4 meq/g, 2.0 equiv.) followed by dry toluene (1.0 mL). A solution of the crude reaction mixture in dry toluene (2.0 mL) was added dropwise and the reaction mixture was stirred at rt for 1 h. Next, the reaction mixture was heated to 110 °C and stirred at reflux for 12 h after which the reaction was complete as judged by complete consumption of the intermediate by TLC (30% EtOAc/hexanes). The crude reaction mixture was filtered through a pad of celite, rinsed with CH<sub>2</sub>Cl<sub>2</sub> (10 mL) x 5, and the filtrate was concentrated *in vacuo*. To a flame-dried, 10 mL round bottom flask under nitrogen was dissolved the crude reaction mixture in dry CH<sub>2</sub>Cl<sub>2</sub> (3.1 mL, 0.1 M) and the solution cooled to 0 °C in an ice bath while stirring. HCl in dioxane (4.0 M, 0.75 mL, 10.0 equiv.) was added dropwise. The reaction mixture was allowed to slowly warm to rt. The reaction mixture was stirred at rt for 12 h after which the reaction was complete as judged by complete consumption of intermediate on TLC (30% EtOAc/hexanes). The solvent was removed *in vacuo*. Triethylamine (0.4 mL, 3.1 mmol, 10.0 equiv.) was added to a solution of the crude reaction mixture in MeOH (3.1 mL, 0.1 M) in a 10 mL microwave vial and the reaction mixture was heated in a microwave reactor at 100 °C for 1 h. The reaction mixture was allowed to cool to rt and the solvent removed *in vacuo*. The crude mixture was dissolved in CH<sub>2</sub>Cl<sub>2</sub> (10 mL) and washed with water (10 mL), then saturated brine solution (10 mL), dried over MgSO<sub>4</sub>, filtered and concentrated *in vacuo*. The crude residue was purified by normal-phase chromatography (1-5% EtOAc:MeOH) to yield the benzamidine, **13c** (48 mg, 48%) as an amber gum.

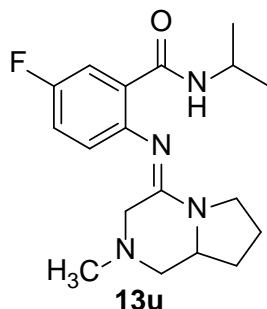

**(E)-5-fluoro-N-isopropyl-2-((2-methylhexahydropyrrolo[1,2-a]pyrazin-4(1H)-ylidene)amino)benzamide 13u.** Obtained using **general procedure F**. Purified by normal-phase chromatography (0-3% EtOAc/CH<sub>2</sub>Cl<sub>2</sub>) to yield the benzamidine, **13u** (51 mg, 50%) as a pale-yellow gum. <sup>1</sup>H NMR (400 MHz, Chloroform-d) δ 8.62 (d, J = 7.7 Hz, 1H), 7.85 (dd, J = 10.0, 3.1 Hz, 1H), 7.07 – 6.94 (m, 1H), 6.69 (dd, J = 8.7, 5.0 Hz, 1H), 4.31 – 4.15 (m, 1H), 3.78 – 3.51 (m, 3H), 3.30 (d, J = 16.3 Hz, 1H), 3.08 (dd, J = 10.8, 3.8 Hz, 1H), 2.56 (d, J = 16.2 Hz, 1H), 2.24 (s, 3H), 2.09 (dq, J = 11.8, 6.2, 5.7 Hz, 2H), 1.95 (dd, J = 12.7, 8.7 Hz, 2H), 1.48 (qd, J = 11.7, 7.9 Hz, 1H), 1.19 (dd, J = 6.5, 1.6 Hz, 6H). <sup>19</sup>F NMR (376 MHz, CDCl<sub>3</sub>) δ -121.28. <sup>13</sup>C NMR (101 MHz, CDCl<sub>3</sub>) δ 170.2, 164.7, 164.7, 159.9, 157.5, 154.5, 144.7, 144.7, 144.6, 127.2, 127.1, 124.7, 124.6, 118.3, 118.1, 117.2, 116.9, 57.9, 57.8, 54.2, 45.8, 45.2, 41.3, 30.4, 23.1, 23.0, 22.5. HRMS (ESI): Calculated for C<sub>18</sub>H<sub>25</sub>FN<sub>4</sub>O (M<sup>+</sup>+H): 333.20852; Found: 333.20814.

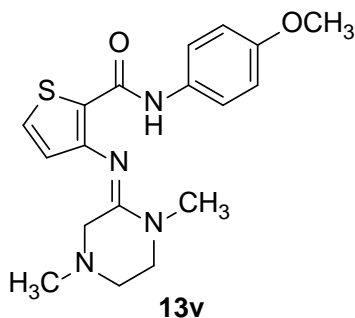

**(E)-3-((1,4-dimethylpiperazin-2-ylidene)amino)-N-(4-methoxyphenyl)thiophene-2-carboxamide 13v.** Obtained using **general procedure F**. Purified by normal-phase chromatography (0-3% MeOH/EtOAc) to yield the thiophene carboxamidine, **13v** (32mg, 29%) as a light-brown solid. m.p.: 125-127°C. <sup>1</sup>H NMR (400 MHz, Chloroform-d) δ 10.21 (s, 1H), 7.55 – 7.46 (m, 2H), 7.35 (d, J = 5.2 Hz, 1H), 6.89 – 6.83 (m, 2H), 6.60 (d, J = 5.2 Hz, 1H), 3.80 (s, 3H), 3.43 (t, J = 5.6 Hz, 2H), 3.22 (s, 4H), 2.67 (t, J = 5.6 Hz, 2H), 2.30 (s, 3H). <sup>13</sup>C NMR (101 MHz, CDCl<sub>3</sub>) δ 160.9, 157.1, 155.7, 147.9, 132.1, 128.1, 124.5, 123.8, 121.2, 114.2, 55.5, 55.4, 52.0, 49.7, 45.5, 36.7. HRMS (ESI): Calculated for C<sub>18</sub>H<sub>22</sub>N<sub>4</sub>O<sub>2</sub>S (M<sup>+</sup>+H): 359.15362; Found: 359.15459.

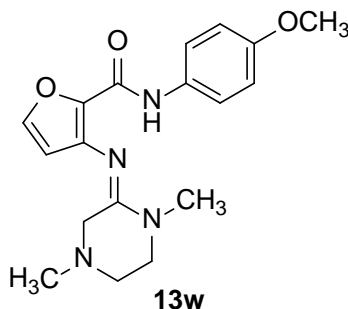

### **(E)-3-((1,4-dimethylpiperazin-2-ylidene)amino)-N-(4-methoxyphenyl)furan-2-carboxamide**

**13w.** Obtained using **general procedure F**. Purified by normal-phase chromatography (5-30% EtOAc/CH<sub>2</sub>Cl<sub>2</sub>) to yield furan carboxamidine, **13w** (21 mg, 20%) as a light-brown solid. m.p.: 150-151°C. <sup>1</sup>H NMR (400 MHz, Chloroform-*d*) δ 9.82 (s, 1H), 7.51 (d, *J* = 9.0 Hz, 2H), 7.44 (d, *J* = 1.9 Hz, 1H), 6.87 (d, *J* = 9.1 Hz, 2H), 6.17 (d, *J* = 1.9 Hz, 1H), 3.79 (s, 3H), 3.43 (t, *J* = 5.6 Hz, 2H), 3.31 (s, 2H), 3.20 (s, 3H), 2.69 (t, *J* = 5.6 Hz, 2H), 2.35 (s, 3H). <sup>13</sup>C NMR (101 MHz, CDCl<sub>3</sub>) δ 157.7, 157.5, 155.7, 143.8, 137.5, 136.7, 132.0, 121.2, 114.2, 108.9, 55.5, 55.4, 51.9, 49.7, 45.5, 36.9. HRMS (ESI): Calculated for C<sub>18</sub>H<sub>22</sub>N<sub>4</sub>O<sub>3</sub> (M<sup>+</sup>+H): 343.17647; Found: 343.17700.

## **2. Crystallographic Structural Report for 13t**

### **2.1 Data Collection**

A colorless crystal with approximate dimensions 0.14 x 0.10 x 0.06 mm<sup>3</sup> was selected under oil under ambient conditions and attached to the tip of a MiTeGen MicroMount®. The crystal was mounted in a stream of cold nitrogen at 100(1) K and centered in the X-ray beam by using a video camera.

The crystal evaluation and data collection were performed on a Bruker Quazar SMART APEXII diffractometer with Mo K<sub>α</sub> (λ = 0.71073 Å) radiation and the diffractometer to crystal distance of 4.96 cm<sup>9</sup>.

The initial cell constants were obtained from three series of ω scans at different starting angles. Each series consisted of 12 frames collected at intervals of 0.5° in a 6° range about ω with the exposure time of 10 seconds per frame. The reflections were successfully indexed by an automated indexing routine built in the APEX3 program suite. The final cell constants were calculated from a set of 9800 strong reflections from the actual data collection.

The data were collected by using the full sphere data collection routine to survey the reciprocal space to the extent of a full sphere to a resolution of 0.65 Å. A total of 33980 data were harvested by collecting 3 sets of frames with 0.5° scans in ω and φ with exposure times of 40 sec per frame. These highly redundant datasets were corrected for Lorentz and polarization effects. The absorption correction was based on fitting a function to the empirical transmission surface as sampled by multiple equivalent measurements.<sup>10</sup>

### **2.2 Structure Solution and Refinement**

The systematic absences in the diffraction data were uniquely consistent for the space group *P*2<sub>1</sub>/*c* that yielded chemically reasonable and computationally stable results of refinement<sup>11-16</sup>.

A successful solution by the direct methods provided most non-hydrogen atoms from the *E*-map. The remaining non-hydrogen atoms were located in an alternating series of least-squares cycles and difference Fourier maps. All non-hydrogen atoms were refined with anisotropic displacement coefficients. All hydrogen atoms except H4 (bound to N4) were included in the structure factor calculation at idealized positions and were allowed to ride on the neighboring atoms with relative isotropic displacement coefficients.

The crystal structure is that of a racemate. The shown enantiomer (*S*) was chosen arbitrarily.

The final least-squares refinement of 286 parameters against 8585 data resulted in residuals *R* (based on *F*<sup>2</sup> for *I* ≥ 2σ) and *wR* (based on *F*<sup>2</sup> for all data) of 0.0191 and 0.0506, respectively. The final difference Fourier map was featureless.

## 2.3 Summary

**Crystal Data** for  $C_{25}H_{31}IN_4O$  ( $M = 530.44$  g/mol): monoclinic, space group  $P2_1/c$  (no. 14),  $a = 11.677(4)$  Å,  $b = 12.610(4)$  Å,  $c = 16.020(5)$  Å,  $\beta = 99.578(13)^\circ$ ,  $V = 2325.9(13)$  Å<sup>3</sup>,  $Z = 4$ ,  $T = 99.99$  K,  $\mu(\text{MoK}\alpha) = 1.401$  mm<sup>-1</sup>,  $D_{\text{calc}} = 1.515$  g/cm<sup>3</sup>, 33980 reflections measured ( $3.538^\circ \leq 2\theta \leq 66.282^\circ$ ), 8585 unique ( $R_{\text{int}} = 0.0177$ ,  $R_{\text{sigma}} = 0.0156$ ) which were used in all calculations. The final  $R_1$  was 0.0191 ( $I > 2\sigma(I)$ ) and  $wR_2$  was 0.0506 (all data).

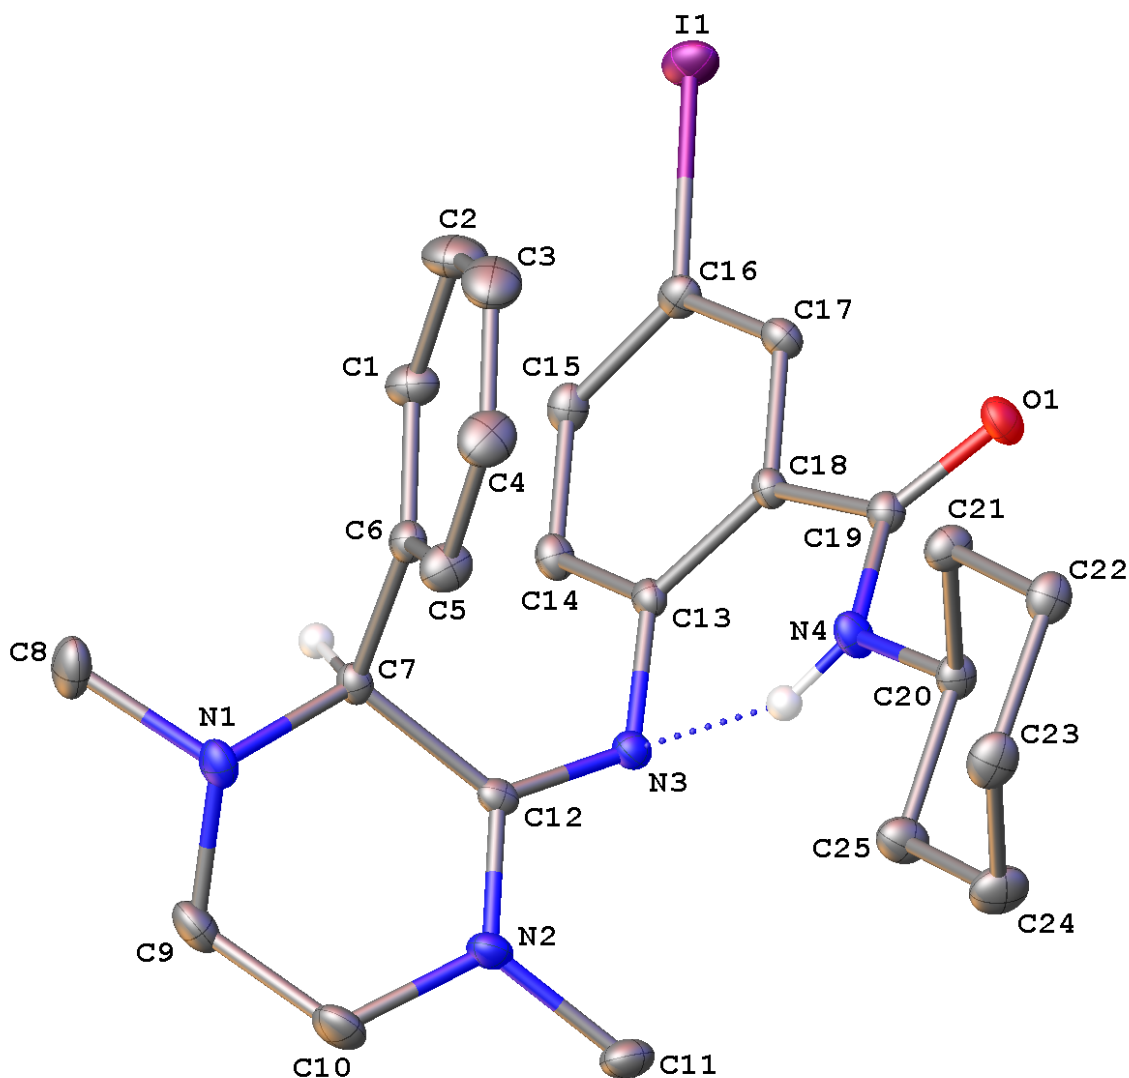

**Figure 1.** A molecular drawing of Golden01 shown with 50% probability ellipsoids. All H atoms are omitted, except for the amine atom H4 connected to atom N4 (the dotted line represents a hydrogen bonding interaction), and atom H7 attached to the chiral atom C7.

**Table 1 Crystal data and structure refinement for golden01.**

|                                             |                                                               |
|---------------------------------------------|---------------------------------------------------------------|
| Identification code                         | golden01                                                      |
| Empirical formula                           | C <sub>25</sub> H <sub>31</sub> IN <sub>4</sub> O             |
| Formula weight                              | 530.44                                                        |
| Temperature/K                               | 99.99                                                         |
| Crystal system                              | monoclinic                                                    |
| Space group                                 | P2 <sub>1</sub> /c                                            |
| a/Å                                         | 11.677(4)                                                     |
| b/Å                                         | 12.610(4)                                                     |
| c/Å                                         | 16.020(5)                                                     |
| α/°                                         | 90                                                            |
| β/°                                         | 99.578(13)                                                    |
| γ/°                                         | 90                                                            |
| Volume/Å <sup>3</sup>                       | 2325.9(13)                                                    |
| Z                                           | 4                                                             |
| ρ <sub>calc</sub> /g/cm <sup>3</sup>        | 1.515                                                         |
| μ/mm <sup>-1</sup>                          | 1.401                                                         |
| F(000)                                      | 1080.0                                                        |
| Crystal size/mm <sup>3</sup>                | 0.138 × 0.102 × 0.06                                          |
| Radiation                                   | MoKα (λ = 0.71073)                                            |
| 2θ range for data collection/°              | 3.538 to 66.282                                               |
| Index ranges                                | -17 ≤ h ≤ 17, -19 ≤ k ≤ 19, -24 ≤ l ≤ 23                      |
| Reflections collected                       | 33980                                                         |
| Independent reflections                     | 8585 [R <sub>int</sub> = 0.0177, R <sub>sigma</sub> = 0.0156] |
| Data/restraints/parameters                  | 8585/0/286                                                    |
| Goodness-of-fit on F <sup>2</sup>           | 1.031                                                         |
| Final R indexes [I ≥ 2σ (I)]                | R <sub>1</sub> = 0.0191, wR <sub>2</sub> = 0.0494             |
| Final R indexes [all data]                  | R <sub>1</sub> = 0.0219, wR <sub>2</sub> = 0.0506             |
| Largest diff. peak/hole / e Å <sup>-3</sup> | 0.56/-0.44                                                    |

**Table 2 Fractional Atomic Coordinates (×10<sup>4</sup>) and Equivalent Isotropic Displacement Parameters (Å<sup>2</sup>×10<sup>3</sup>) for golden01. U<sub>eq</sub> is defined as 1/3 of the trace of the orthogonalised U<sub>ij</sub> tensor.**

| Atom | x          | y          | z         | U(eq)     |
|------|------------|------------|-----------|-----------|
| I1   | 8640.3(2)  | -1143.1(2) | 3078.8(2) | 20.02(2)  |
| O1   | 8471.8(7)  | 2478.3(6)  | 1209.8(4) | 16.19(13) |
| N1   | 6476.5(8)  | 4411.5(7)  | 4874.0(5) | 14.73(14) |
| N2   | 8371.9(8)  | 5303.5(6)  | 4296.4(5) | 14.62(14) |
| N3   | 8895.1(7)  | 3789.5(6)  | 3691.6(5) | 11.97(14) |
| N4   | 8163.7(8)  | 3938.6(6)  | 1968.0(5) | 13.45(14) |
| C1   | 6178.8(9)  | 2201.2(8)  | 3496.6(7) | 17.21(17) |
| C2   | 5394.7(10) | 1830.1(9)  | 2808.6(8) | 24.5(2)   |
| C3   | 4751.8(10) | 2537.2(10) | 2257.4(7) | 24.9(2)   |
| C4   | 4897.9(10) | 3621.0(9)  | 2392.0(7) | 22.6(2)   |
| C5   | 5687.2(9)  | 3993.2(8)  | 3073.2(6) | 17.51(18) |
| C6   | 6335.2(8)  | 3284.3(7)  | 3634.6(6) | 12.20(15) |
| C7   | 7148.6(8)  | 3710.1(7)  | 4403.6(6) | 11.35(15) |
| C8   | 5750.0(11) | 3775.0(9)  | 5345.1(7) | 21.4(2)   |
| C9   | 7235.2(10) | 5113.0(8)  | 5434.7(6) | 19.39(19) |
| C10  | 7802.2(10) | 5873.8(8)  | 4905.4(7) | 19.77(19) |
| C11  | 9331.1(10) | 5854.7(8)  | 4007.5(7) | 18.58(18) |

|     |            |           |           |           |
|-----|------------|-----------|-----------|-----------|
| C12 | 8194.4(8)  | 4260.6(7) | 4124.9(5) | 10.82(14) |
| C13 | 8854.9(8)  | 2698.7(7) | 3537.5(5) | 10.76(14) |
| C14 | 9104.7(8)  | 1986.0(7) | 4221.0(6) | 12.93(15) |
| C15 | 9074.8(8)  | 898.5(8)  | 4098.7(6) | 13.88(16) |
| C16 | 8816.0(8)  | 496.9(7)  | 3280.3(6) | 13.30(15) |
| C17 | 8647.9(9)  | 1179.7(7) | 2594.4(6) | 12.82(15) |
| C18 | 8672.5(8)  | 2279.6(7) | 2706.9(5) | 10.70(14) |
| C19 | 8434.5(8)  | 2910.2(7) | 1897.3(6) | 11.96(15) |
| C20 | 7933.6(8)  | 4662.0(7) | 1249.4(6) | 13.15(15) |
| C21 | 6792.1(9)  | 4398.3(8) | 672.2(6)  | 15.44(17) |
| C22 | 6530.4(9)  | 5200.5(8) | -51.1(6)  | 15.99(17) |
| C23 | 6487.0(10) | 6328.0(8) | 289.6(7)  | 18.94(18) |
| C24 | 7619.0(10) | 6602.4(8) | 871.6(7)  | 20.87(19) |
| C25 | 7911.9(10) | 5793.5(8) | 1587.2(6) | 17.70(18) |

**Table 3 Anisotropic Displacement Parameters ( $\text{\AA}^2 \times 10^3$ ) for golden01. The Anisotropic displacement factor exponent takes the form:  $-2\pi^2[h^2a^{*2}U_{11}+2hka^*b^*U_{12}+\dots]$ .**

| Atom | $U_{11}$ | $U_{22}$ | $U_{33}$ | $U_{23}$ | $U_{13}$ | $U_{12}$ |
|------|----------|----------|----------|----------|----------|----------|
| l1   | 20.89(4) | 10.47(3) | 29.34(4) | 0.14(2)  | 6.07(3)  | 1.91(2)  |
| O1   | 22.1(4)  | 16.5(3)  | 10.0(3)  | -1.2(2)  | 3.0(3)   | 1.4(3)   |
| N1   | 16.9(4)  | 14.3(3)  | 13.9(3)  | -0.5(3)  | 5.5(3)   | 4.2(3)   |
| N2   | 19.3(4)  | 10.1(3)  | 14.3(3)  | -2.1(3)  | 2.5(3)   | -1.1(3)  |
| N3   | 13.7(4)  | 11.7(3)  | 10.4(3)  | -0.8(2)  | 1.9(3)   | -0.4(2)  |
| N4   | 18.3(4)  | 13.0(3)  | 8.9(3)   | 1.4(2)   | 2.0(3)   | 3.5(3)   |
| C1   | 15.6(4)  | 14.4(4)  | 20.8(4)  | -0.8(3)  | 0.7(4)   | -0.3(3)  |
| C2   | 22.0(5)  | 20.5(5)  | 29.1(5)  | -6.6(4)  | -1.0(4)  | -4.8(4)  |
| C3   | 20.1(5)  | 32.2(6)  | 20.2(5)  | -3.8(4)  | -2.7(4)  | -6.1(4)  |
| C4   | 19.1(5)  | 28.3(5)  | 18.0(4)  | 4.0(4)   | -4.0(4)  | -1.7(4)  |
| C5   | 16.6(4)  | 18.0(4)  | 16.5(4)  | 3.9(3)   | -1.4(3)  | 0.2(3)   |
| C6   | 11.3(4)  | 13.6(4)  | 12.0(3)  | 0.2(3)   | 2.8(3)   | 0.6(3)   |
| C7   | 12.7(4)  | 11.0(3)  | 10.7(3)  | 0.5(3)   | 2.8(3)   | 2.3(3)   |
| C8   | 23.6(5)  | 21.7(5)  | 22.2(5)  | 2.9(4)   | 13.1(4)  | 5.4(4)   |
| C9   | 26.0(5)  | 18.8(4)  | 13.5(4)  | -4.4(3)  | 4.0(4)   | 3.8(4)   |
| C10  | 27.0(5)  | 12.4(4)  | 20.2(4)  | -4.9(3)  | 4.6(4)   | 2.4(4)   |
| C11  | 21.9(5)  | 14.2(4)  | 18.9(4)  | -0.1(3)  | 1.3(4)   | -5.5(3)  |
| C12  | 13.1(4)  | 10.2(3)  | 8.2(3)   | 0.3(3)   | -1.0(3)  | 0.9(3)   |
| C13  | 9.8(4)   | 12.4(3)  | 10.2(3)  | -0.7(3)  | 2.2(3)   | 0.3(3)   |
| C14  | 12.7(4)  | 15.7(4)  | 10.1(3)  | 0.8(3)   | 1.2(3)   | 2.4(3)   |
| C15  | 12.8(4)  | 15.2(4)  | 13.7(4)  | 3.5(3)   | 2.5(3)   | 3.5(3)   |
| C16  | 13.1(4)  | 10.8(3)  | 16.4(4)  | 1.2(3)   | 3.6(3)   | 2.5(3)   |
| C17  | 13.8(4)  | 12.2(4)  | 12.4(4)  | -1.4(3)  | 2.0(3)   | 1.6(3)   |
| C18  | 10.9(4)  | 12.2(3)  | 9.1(3)   | 0.3(3)   | 1.7(3)   | 1.4(3)   |
| C19  | 11.5(4)  | 13.2(4)  | 11.2(3)  | 0.9(3)   | 1.8(3)   | 0.8(3)   |
| C20  | 14.7(4)  | 13.6(4)  | 11.2(3)  | 3.0(3)   | 1.9(3)   | 1.8(3)   |
| C21  | 15.7(4)  | 15.1(4)  | 14.7(4)  | 3.8(3)   | 0.2(3)   | -0.2(3)  |
| C22  | 15.2(4)  | 18.3(4)  | 13.9(4)  | 4.9(3)   | 1.0(3)   | 2.1(3)   |
| C23  | 19.1(5)  | 16.9(4)  | 20.8(4)  | 7.1(3)   | 3.1(4)   | 4.4(3)   |
| C24  | 25.3(5)  | 13.7(4)  | 22.7(5)  | 4.9(3)   | 1.1(4)   | -0.7(4)  |
| C25  | 22.9(5)  | 13.7(4)  | 15.5(4)  | 1.7(3)   | 0.4(4)   | 0.9(3)   |

**Table 4 Bond Lengths for golden01.**

| Atom Atom Length/Å |     |            | Atom Atom Length/Å |     |            |
|--------------------|-----|------------|--------------------|-----|------------|
| I1                 | C16 | 2.0979(11) | C5                 | C6  | 1.3979(14) |
| O1                 | C19 | 1.2360(11) | C6                 | C7  | 1.5228(13) |
| N1                 | C7  | 1.4707(12) | C7                 | C12 | 1.5343(14) |
| N1                 | C8  | 1.4651(14) | C9                 | C10 | 1.5048(16) |
| N1                 | C9  | 1.4524(14) | C13                | C14 | 1.4090(13) |
| N2                 | C10 | 1.4586(13) | C13                | C18 | 1.4146(13) |
| N2                 | C11 | 1.4575(14) | C14                | C15 | 1.3848(14) |
| N2                 | C12 | 1.3523(12) | C15                | C16 | 1.3910(14) |
| N3                 | C12 | 1.3012(12) | C16                | C17 | 1.3839(13) |
| N3                 | C13 | 1.3969(12) | C17                | C18 | 1.3983(13) |
| N4                 | C19 | 1.3440(12) | C18                | C19 | 1.5071(13) |
| N4                 | C20 | 1.4583(12) | C20                | C21 | 1.5271(14) |
| C1                 | C2  | 1.3914(15) | C20                | C25 | 1.5277(14) |
| C1                 | C6  | 1.3907(14) | C21                | C22 | 1.5302(14) |
| C2                 | C3  | 1.3849(18) | C22                | C23 | 1.5268(15) |
| C3                 | C4  | 1.3896(17) | C23                | C24 | 1.5252(16) |
| C4                 | C5  | 1.3876(15) | C24                | C25 | 1.5300(14) |

**Table 5 Bond Angles for golden01.**

| Atom Atom Atom Angle/° |     |     |            | Atom Atom Atom Angle/° |     |     |           |
|------------------------|-----|-----|------------|------------------------|-----|-----|-----------|
| C8                     | N1  | C7  | 109.79(8)  | N3                     | C13 | C14 | 119.62(8) |
| C9                     | N1  | C7  | 111.13(8)  | N3                     | C13 | C18 | 121.97(8) |
| C9                     | N1  | C8  | 111.16(8)  | C14                    | C13 | C18 | 118.17(8) |
| C11                    | N2  | C10 | 115.93(8)  | C15                    | C14 | C13 | 121.64(9) |
| C12                    | N2  | C10 | 122.94(9)  | C14                    | C15 | C16 | 119.35(8) |
| C12                    | N2  | C11 | 119.94(8)  | C15                    | C16 | I1  | 120.28(7) |
| C12                    | N3  | C13 | 122.56(8)  | C17                    | C16 | I1  | 119.59(7) |
| C19                    | N4  | C20 | 123.51(8)  | C17                    | C16 | C15 | 120.11(9) |
| C6                     | C1  | C2  | 120.52(10) | C16                    | C17 | C18 | 121.18(9) |
| C3                     | C2  | C1  | 120.26(11) | C13                    | C18 | C19 | 126.14(8) |
| C2                     | C3  | C4  | 119.65(10) | C17                    | C18 | C13 | 119.23(8) |
| C5                     | C4  | C3  | 120.19(10) | C17                    | C18 | C19 | 114.56(8) |
| C4                     | C5  | C6  | 120.48(10) | O1                     | C19 | N4  | 122.95(8) |
| C1                     | C6  | C5  | 118.88(9)  | O1                     | C19 | C18 | 120.37(8) |
| C1                     | C6  | C7  | 121.51(8)  | N4                     | C19 | C18 | 116.67(8) |
| C5                     | C6  | C7  | 119.54(8)  | N4                     | C20 | C21 | 111.68(8) |
| N1                     | C7  | C6  | 108.20(8)  | N4                     | C20 | C25 | 108.44(8) |
| N1                     | C7  | C12 | 113.30(8)  | C21                    | C20 | C25 | 110.71(8) |
| C6                     | C7  | C12 | 110.10(7)  | C20                    | C21 | C22 | 111.02(8) |
| N1                     | C9  | C10 | 108.67(8)  | C23                    | C22 | C21 | 111.05(8) |
| N2                     | C10 | C9  | 110.79(8)  | C24                    | C23 | C22 | 110.66(9) |
| N2                     | C12 | C7  | 118.91(8)  | C23                    | C24 | C25 | 111.70(9) |
| N3                     | C12 | N2  | 117.62(9)  | C20                    | C25 | C24 | 111.84(9) |
| N3                     | C12 | C7  | 123.38(8)  |                        |     |     |           |

**Table 6 Hydrogen Bonds for golden01.**

| D  | H  | A  | d(D-H)/Å  | d(H-A)/Å  | d(D-A)/Å   | D-H-A/°   |
|----|----|----|-----------|-----------|------------|-----------|
| N4 | H4 | N3 | 0.841(16) | 2.067(16) | 2.7576(14) | 139.0(15) |



**Table 7 Hydrogen Atom Coordinates ( $\text{\AA}\times 10^4$ ) and Isotropic Displacement Parameters ( $\text{\AA}^2\times 10^3$ ) for golden01.**

| Atom | x        | y        | z        | U(eq) |
|------|----------|----------|----------|-------|
| H4   | 8274(14) | 4215(13) | 2453(10) | 24(4) |
| H1   | 6610.86  | 1710.86  | 3874.94  | 21    |
| H2   | 5300.03  | 1088.71  | 2716.71  | 29    |
| H3   | 4213.76  | 2282.74  | 1789.69  | 30    |
| H4A  | 4456.14  | 4108.63  | 2016.66  | 27    |
| H5   | 5787.9   | 4735.11  | 3158.53  | 21    |
| H7   | 7439.5   | 3098.14  | 4776.44  | 14    |
| H8A  | 5259.44  | 3299.19  | 4954.46  | 32    |
| H8B  | 5257.68  | 4245.18  | 5620.18  | 32    |
| H8C  | 6246.79  | 3354.73  | 5775.94  | 32    |
| H9A  | 7835.37  | 4693.8   | 5802.33  | 23    |
| H9B  | 6779.69  | 5509.81  | 5800.38  | 23    |
| H10A | 7208.15  | 6357.85  | 4600.12  | 24    |
| H10B | 8382.32  | 6307.72  | 5278.13  | 24    |
| H11A | 9180.67  | 6619.66  | 3992.14  | 28    |
| H11B | 9403.99  | 5607.03  | 3438.84  | 28    |
| H11C | 10053.6  | 5708.13  | 4397.17  | 28    |
| H14  | 9298.55  | 2258.24  | 4779.56  | 16    |
| H15  | 9229.44  | 431.3    | 4569.21  | 17    |
| H17  | 8513.47  | 896.1    | 2037.3   | 15    |
| H20  | 8580.74  | 4601.64  | 914.31   | 16    |
| H21A | 6151.69  | 4402.66  | 1006.83  | 19    |
| H21B | 6840.37  | 3677.88  | 434.79   | 19    |
| H22A | 7138.71  | 5155.26  | -412.68  | 19    |
| H22B | 5775.65  | 5025.68  | -404.69  | 19    |
| H23A | 6355.56  | 6834.55  | -188.99  | 23    |
| H23B | 5830.92  | 6392.39  | 606.18   | 23    |
| H24A | 7550.78  | 7315.35  | 1117.39  | 25    |
| H24B | 8258.68  | 6624.4   | 536.56   | 25    |
| H25A | 8680.38  | 5965.41  | 1922.24  | 21    |
| H25B | 7327.56  | 5841.87  | 1968.05  | 21    |

### 3. References

1. K. Barral, A. D. Moorhouse and J. E. Moses, *Org. Lett.*, 2007, **9**, 1809.
2. A.-C. Bédard, J. Santandrea and S. K. Collins, *J. Flow Chem.*, 2015, **5**, 142.
3. M. S. Yusubov, R. Y. Yusubova, V. N. Nemykin, and V. V. Zhdankin, *J. Org. Chem.*, 2013, **78**, 3767.
4. T. Nishikubo and T. Takaoka, *Nippon Kagaku Kaishi*, 1975, **2**, 327.
5. S. Gronowitz, C. Westerlund, and A. B. Hörnfeldt, *Acta. Chem. Scand.*, 1975, **B29**, 224.
6. C. Si, K. R. Fales, A. Torrado, K. Frimpong, T. Kaoudi, H. G. Vandever, and F. G. Njoroge, *J. Org. Chem.*, 2016, **81**, 4359.
7. A. Folkes, S. Shuttleworth, I. Chuckowree, S. Oxenford,; N. C. Wan, G. Castanedo, J. Gunzner, T. Heffron, S. Mathieu, A. Olivero, D. P. Sutherlin, and B.-Y. Zhu, Patent PCT Int. Appl. WO 2007/127175 A2, 2007.
8. J. Liu, P. Li, Y. Zhang, K. Ren, L. Wang, and G. Wang, *Chirality*, 2010, **22**, 432.
9. Bruker-AXS (2018). *APEX3*. Version 2018.1-0. Madison, Wisconsin, USA.
10. Krause, L., Herbst-Irmer, R., Sheldrick, G. M. & Stalke, D. (2015). *J. Appl. Cryst.* 48. 3-10.
11. Sheldrick, G. M. (2013b). *XPREF*. Version 2013/1. Georg-August-Universität Göttingen, Göttingen, Germany.
12. Sheldrick, G. M. (2013a). The *SHELX* homepage, <http://shelx.uni-ac.gwdg.de/SHELX/>.
13. Sheldrick, G. M. (2015a). *Acta Cryst. A*, 71, 3-8.
14. Sheldrick, G. M. (2015b). *Acta Cryst. C*, 71, 3-8.
15. Dolomanov, O. V., Bourhis, L. J., Gildea, R. J., Howard, J. A. K. & Puschmann, H. (2009). *J. Appl. Crystallogr.* 42, 339-341.
16. Guzei, I. A. (2007-2013). Programs *Gn*. University of Wisconsin-Madison, Madison, Wisconsin, USA.

#### 4. NMR Spectra for Compounds

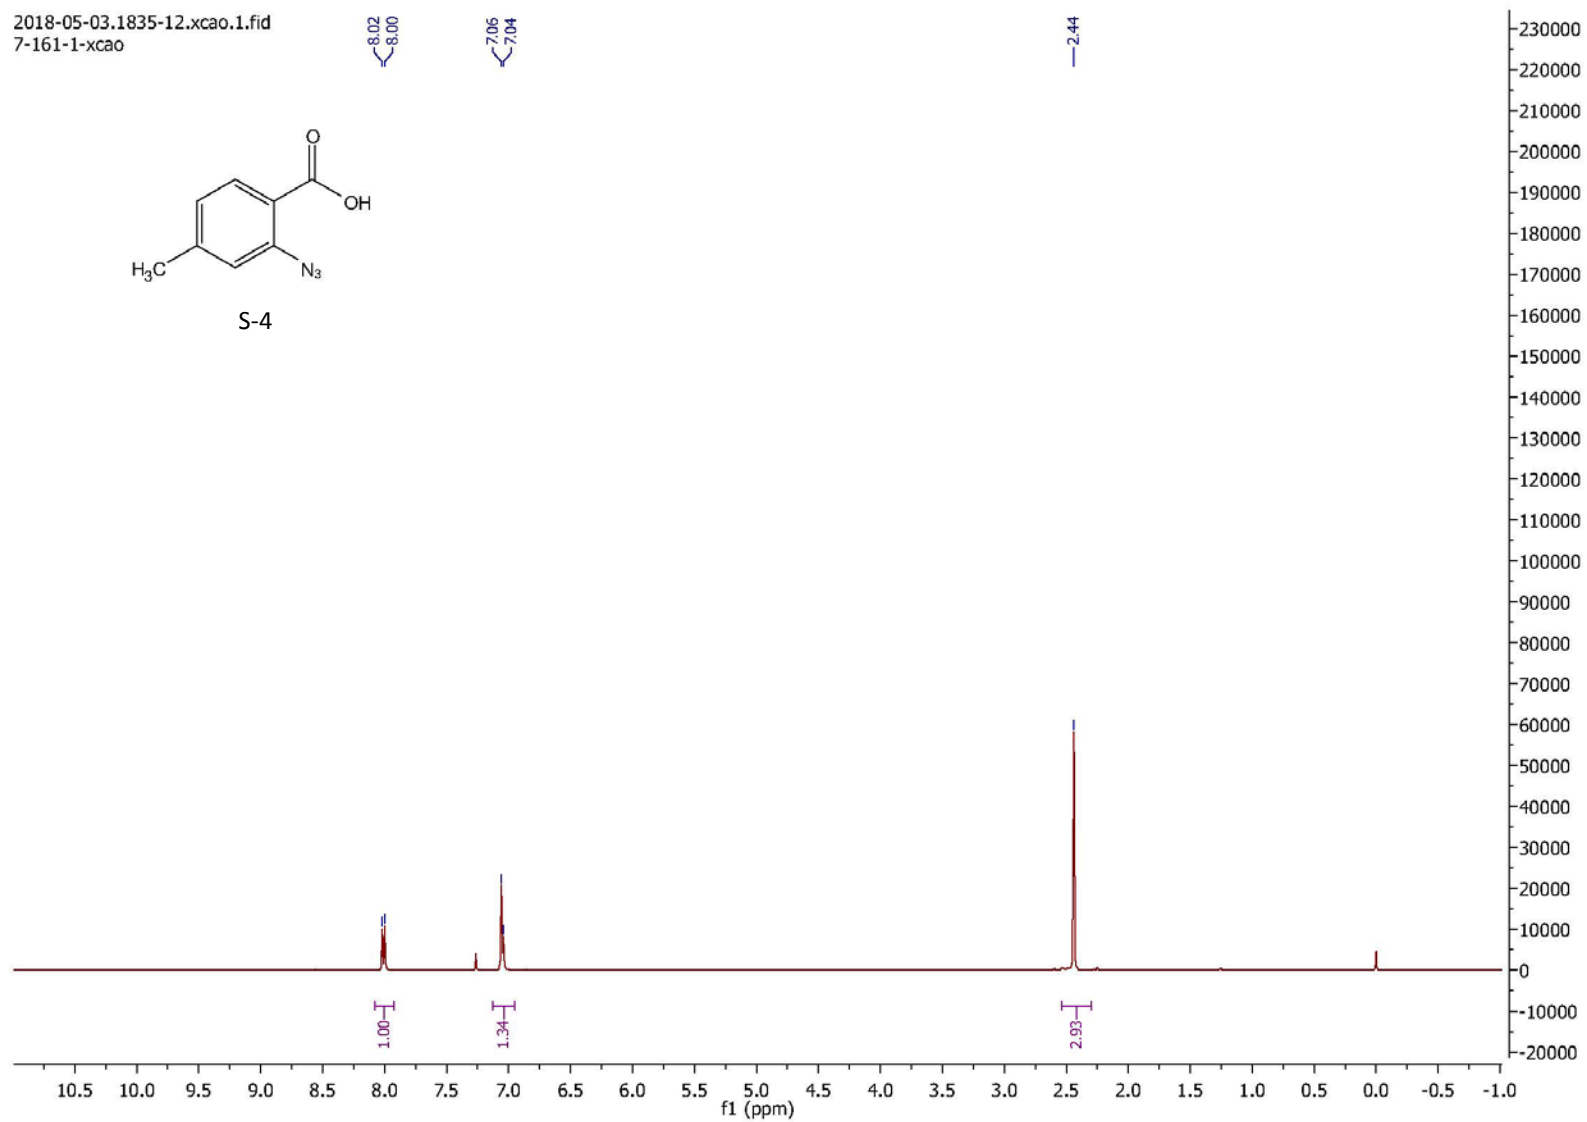

2018-05-03.1835-12.xcao.2.fid  
7-161-1-xcao

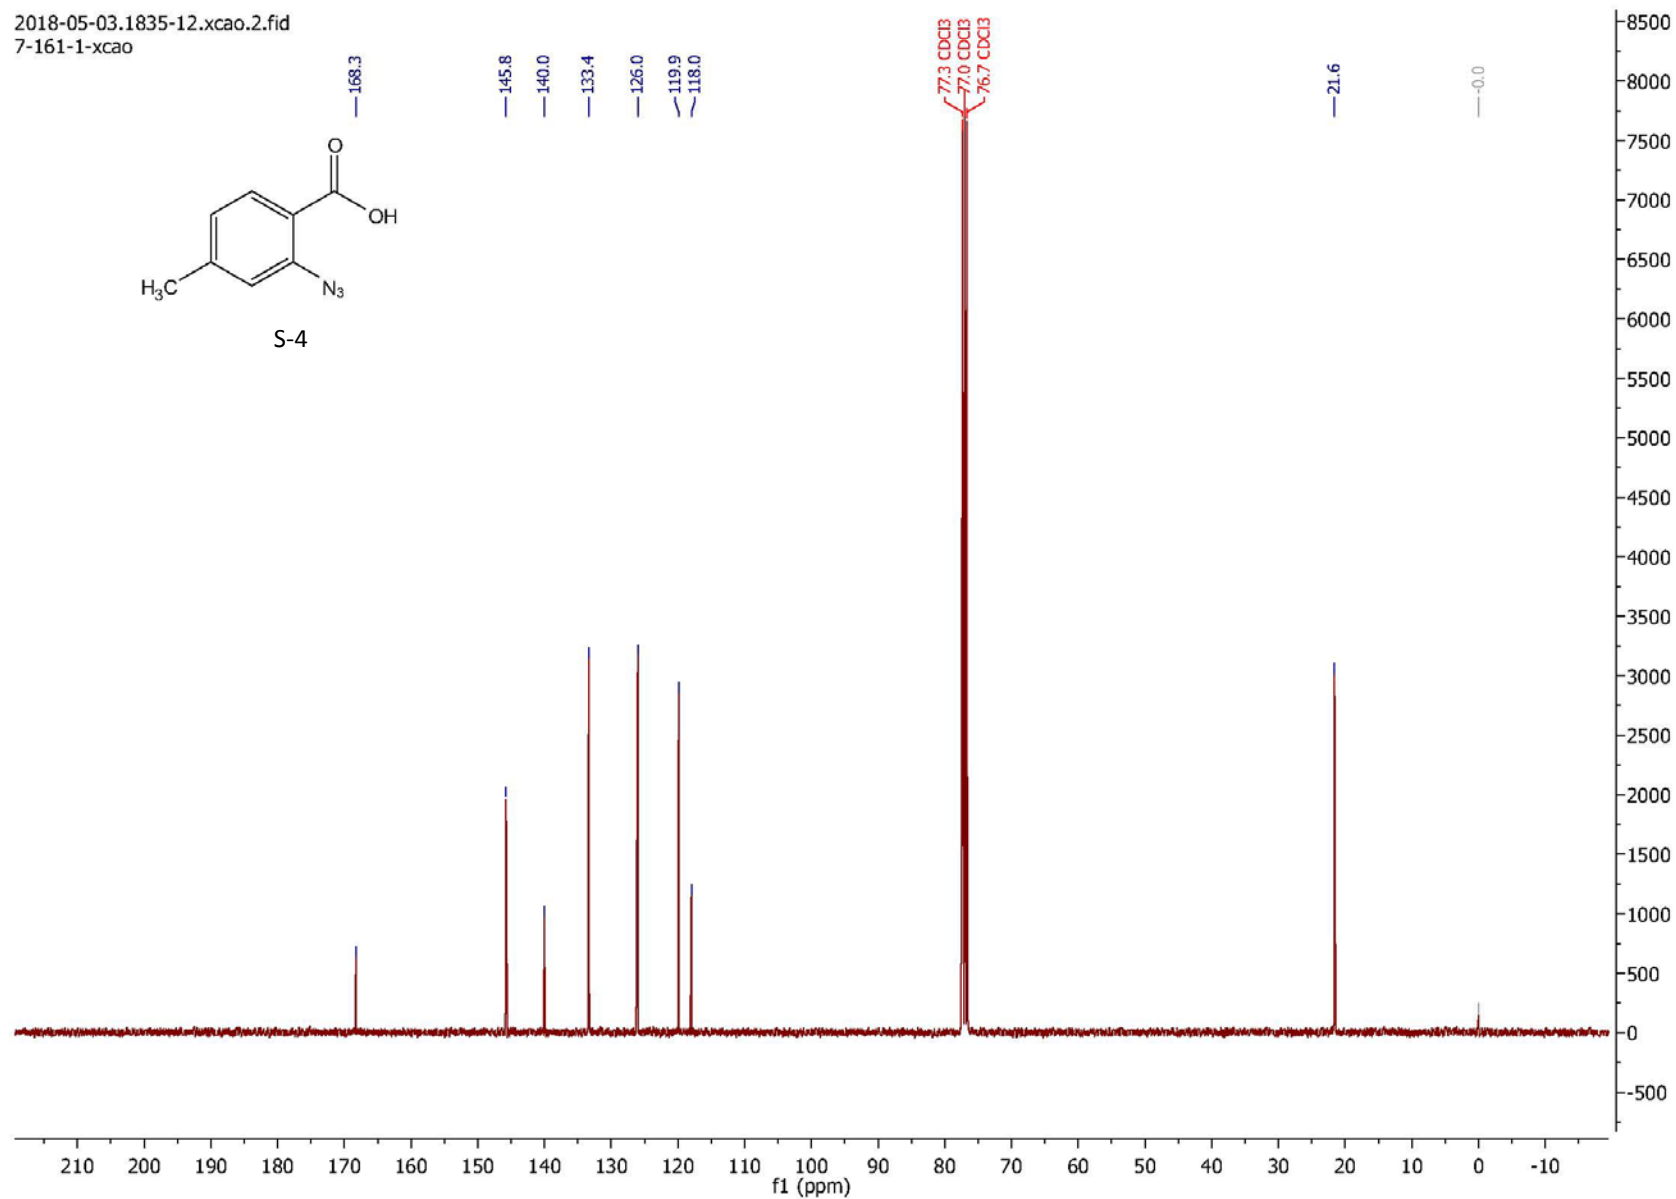

2018-11-12.1751-44.victor.1.fid  
2-152-1-VJ

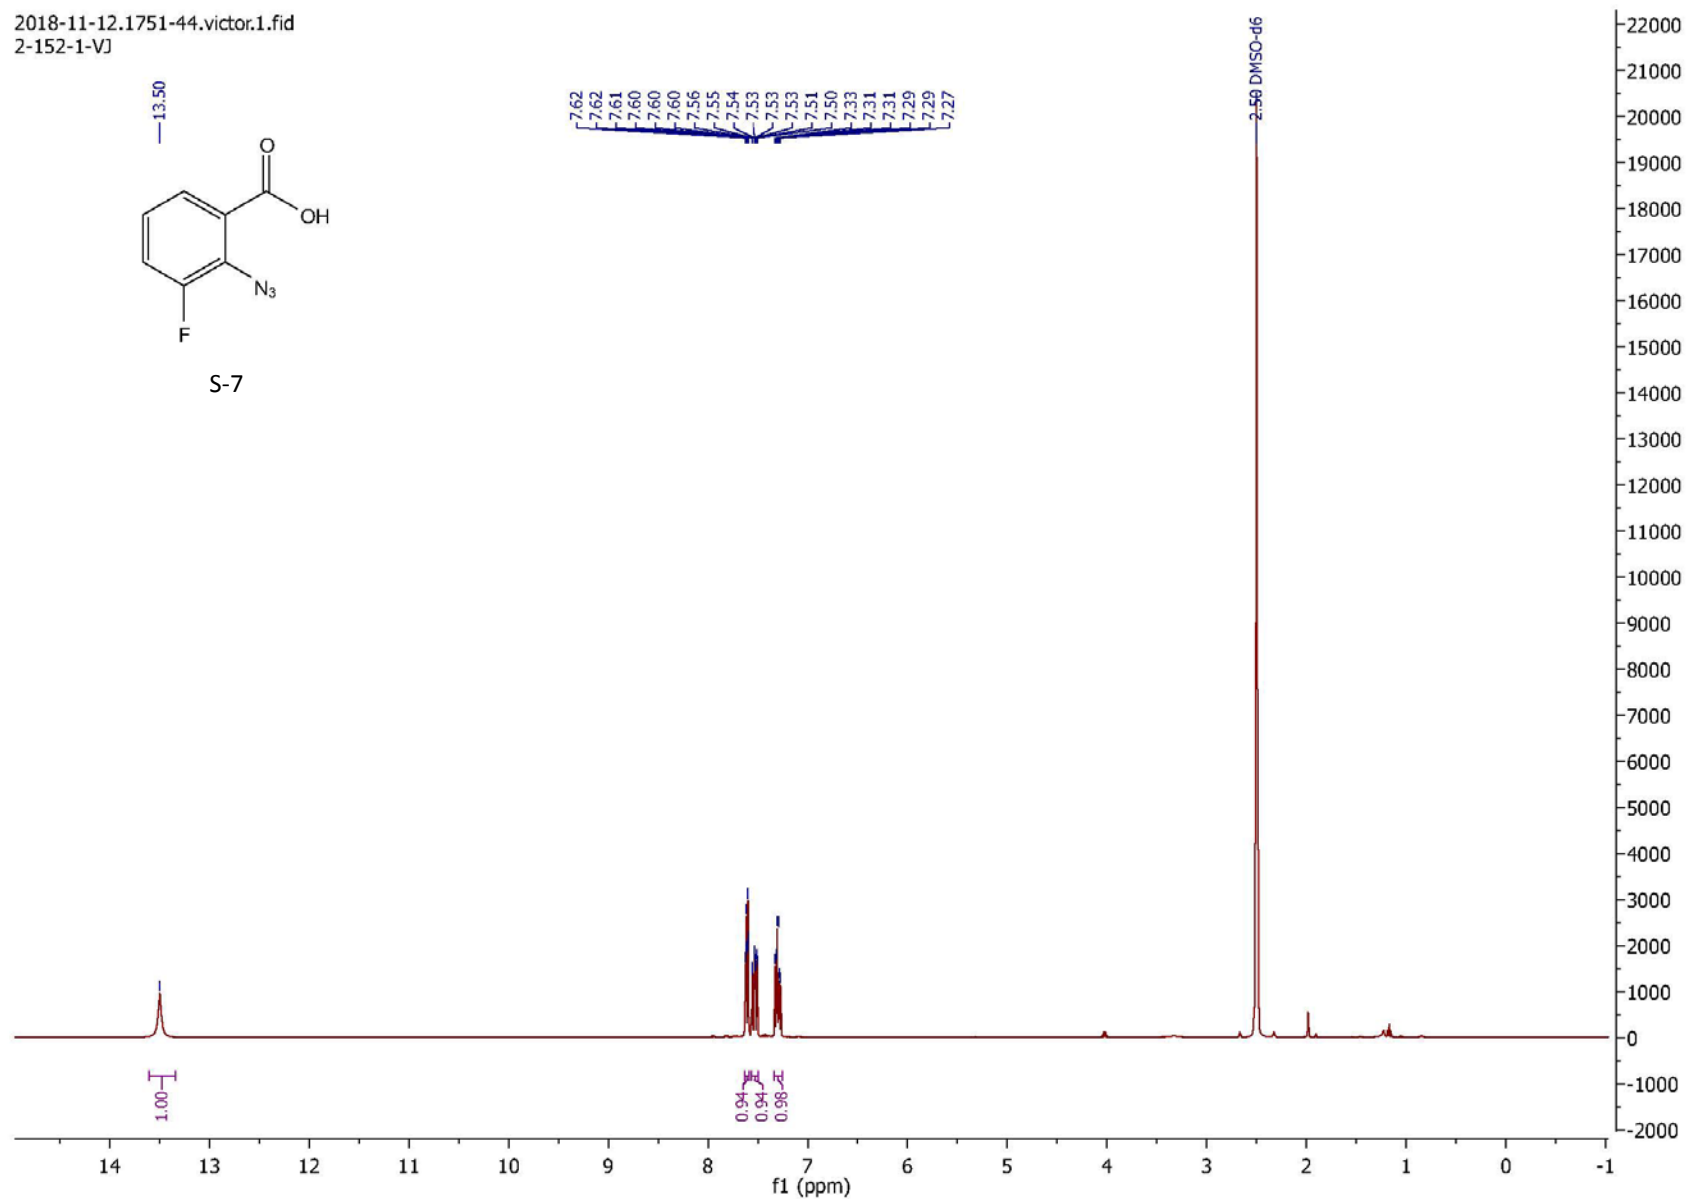

2018-11-12.1751-44.victor.2.fid  
2-152-1-VJ

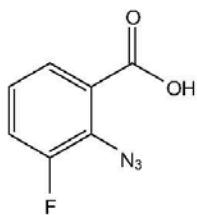

S-7

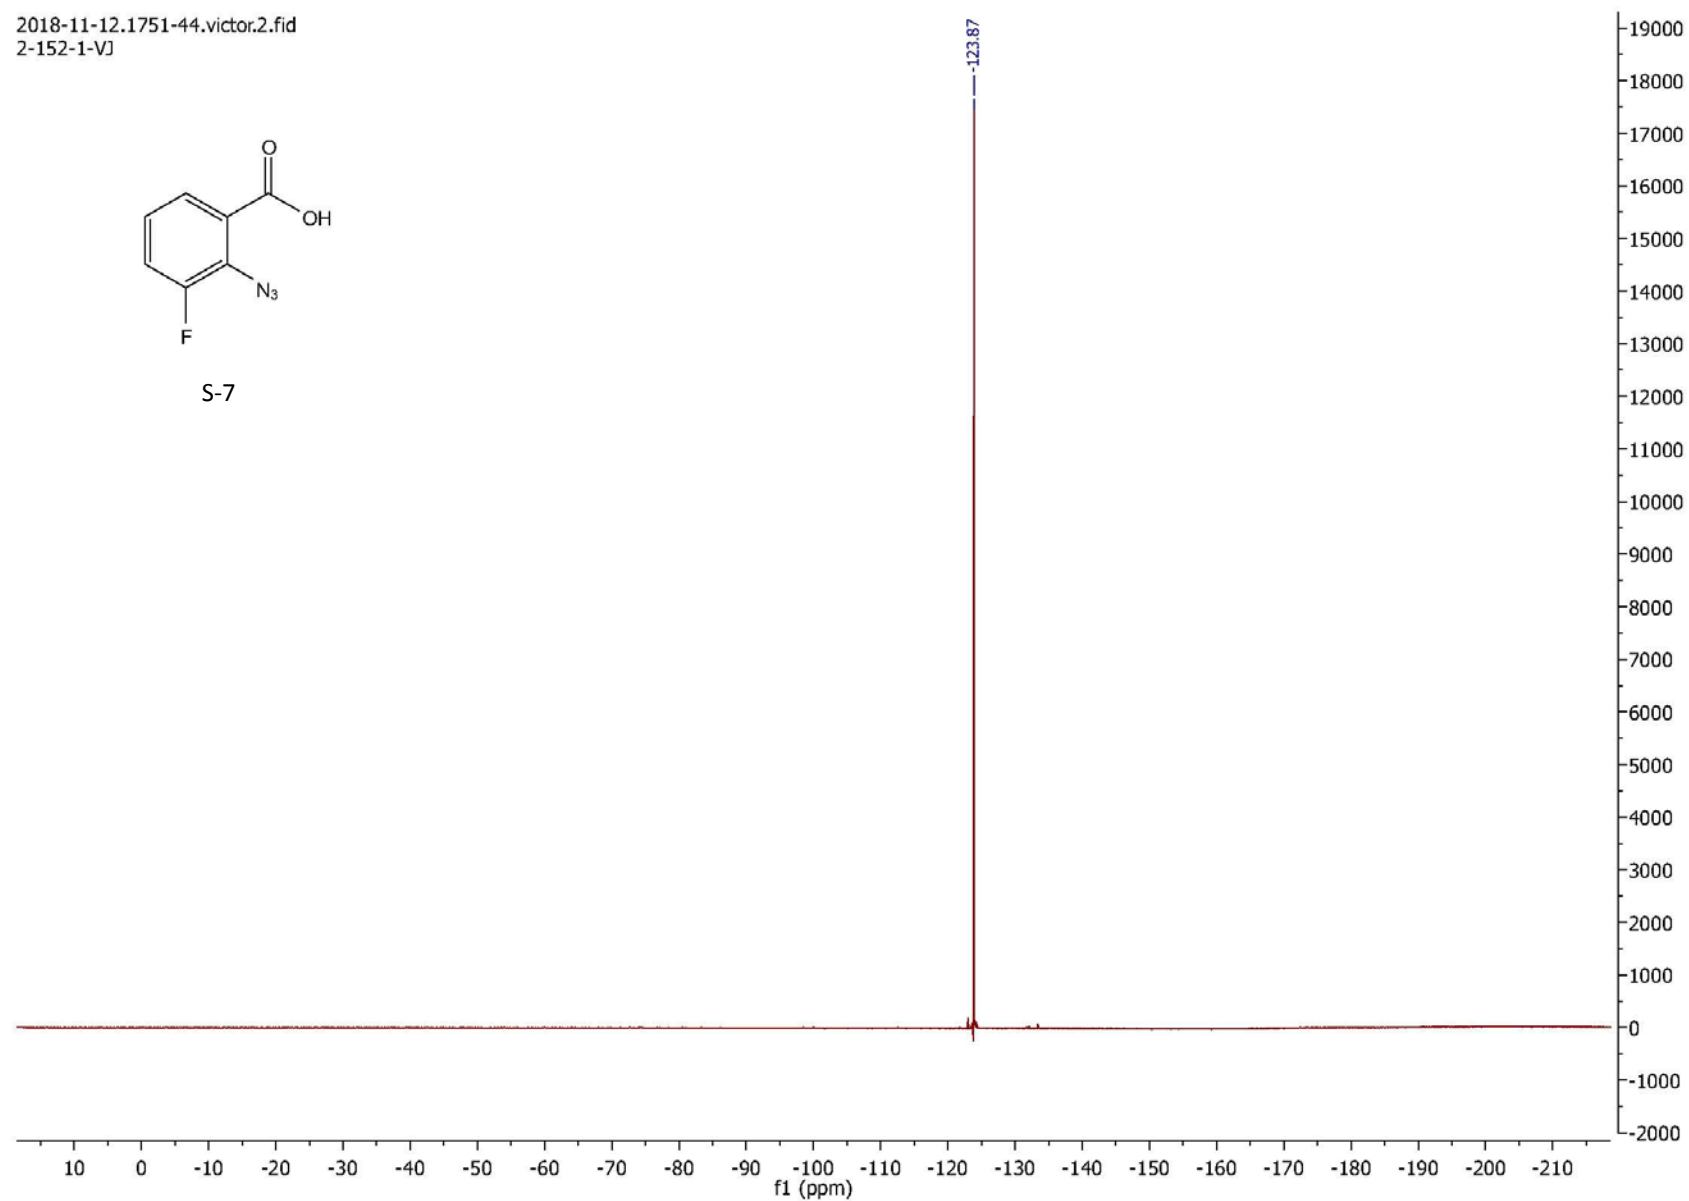

2018-11-12.1751-44.victor.3.fid  
2-152-1-VJ

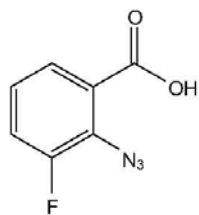

S-7

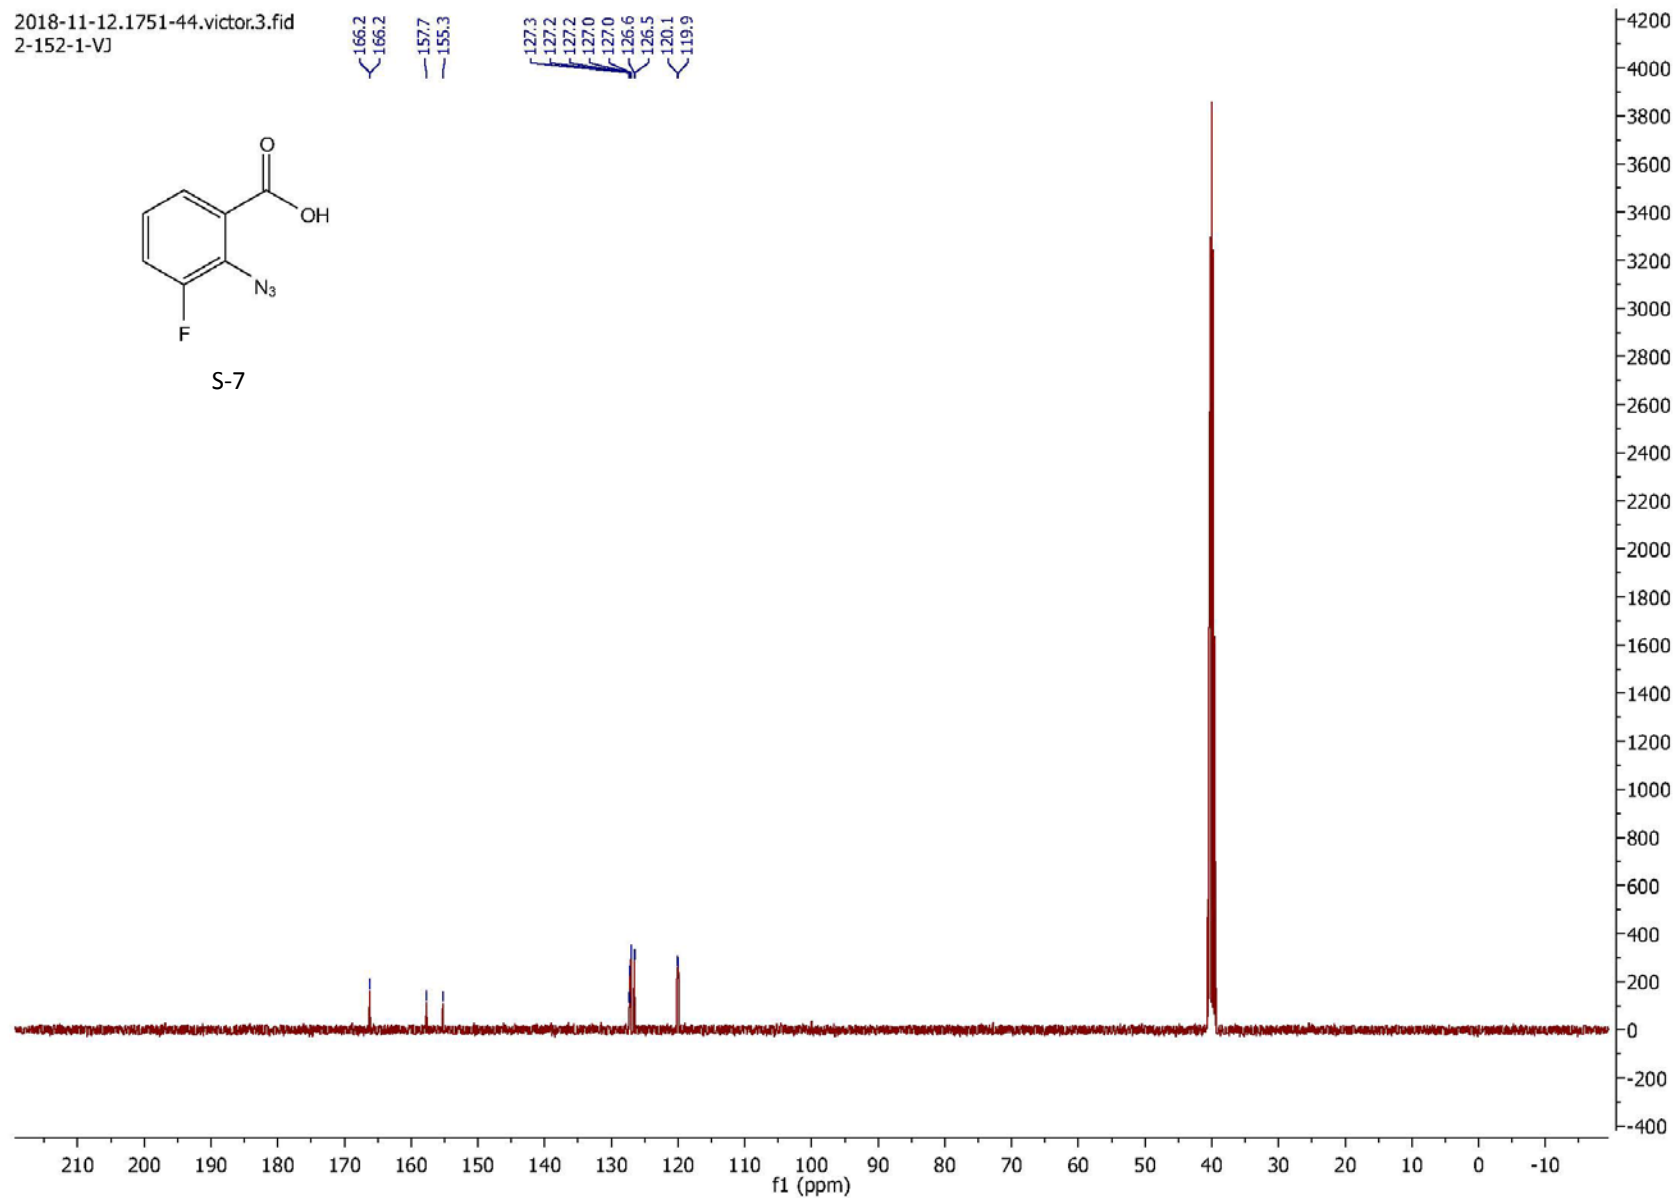

2018-11-11.1426-35.victor.1.fid  
2-214-1-VJ

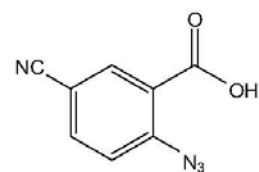

S-8

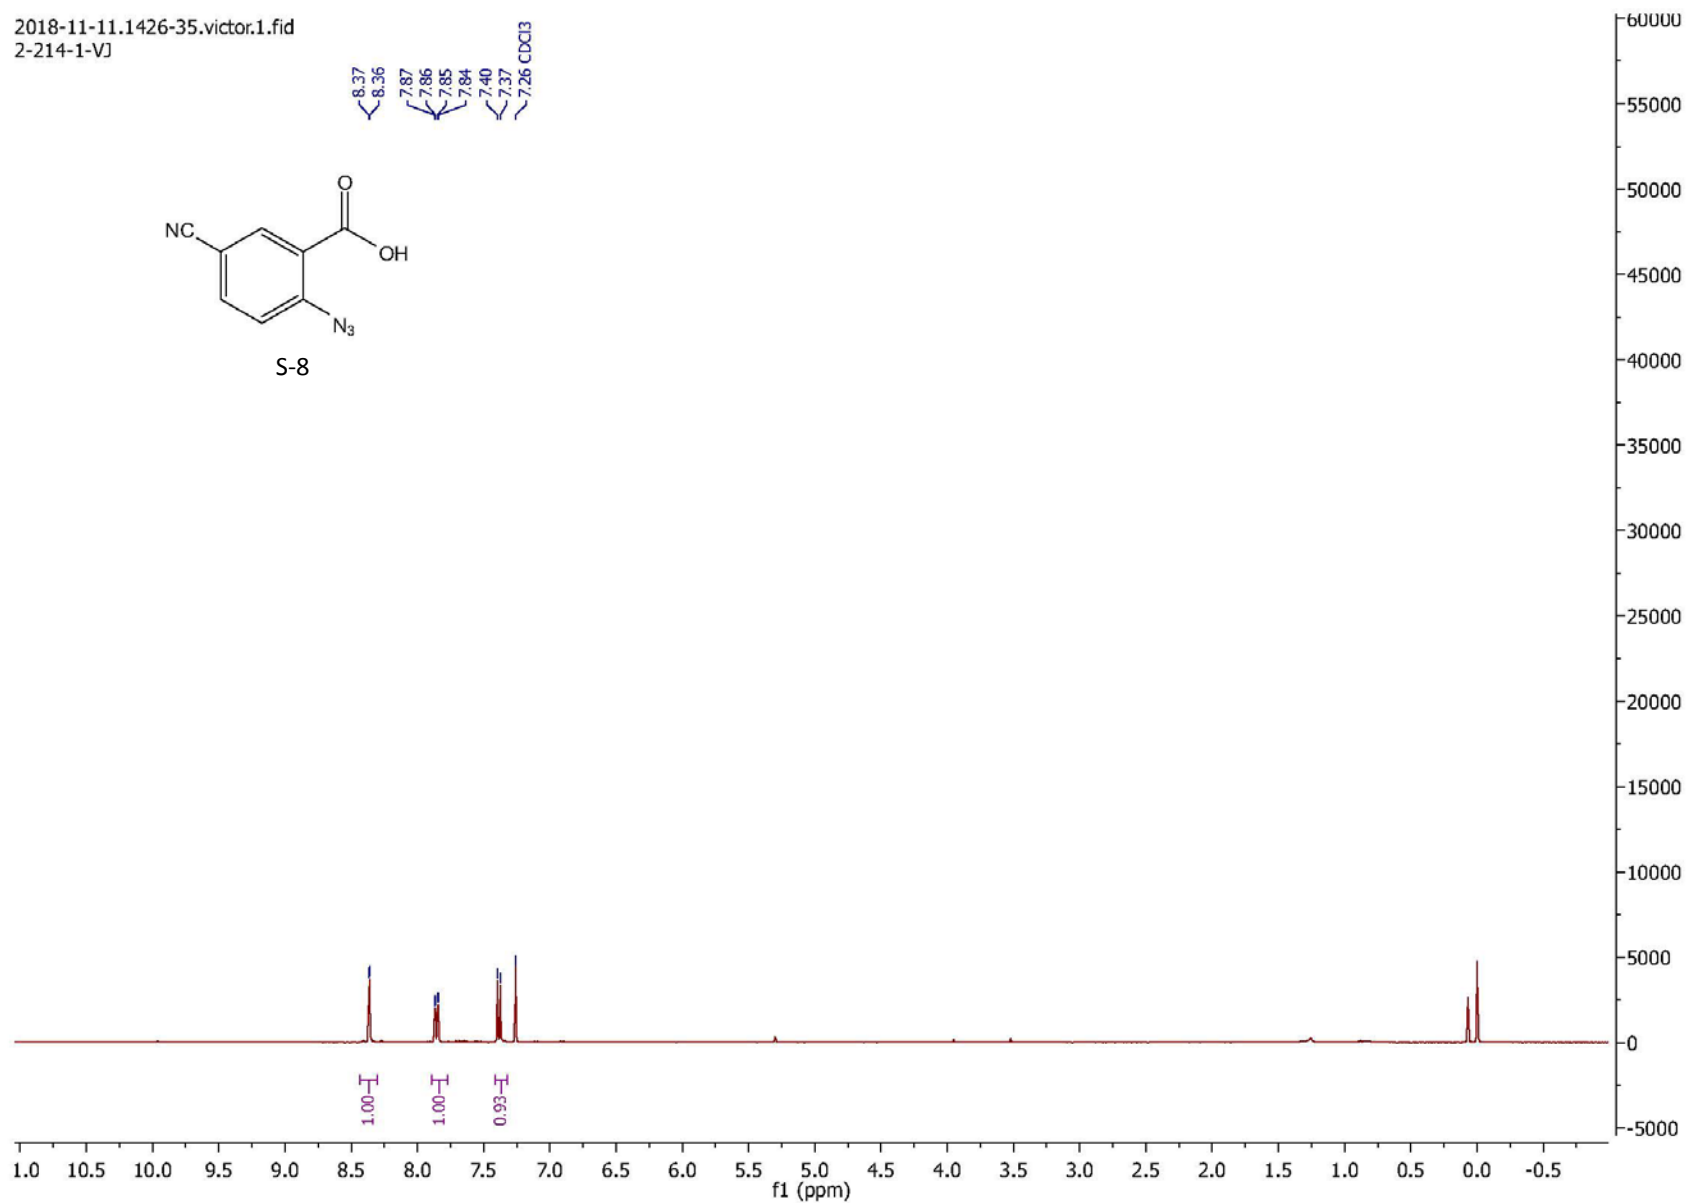



2018-11-11.1426-35.victor.2.fid  
2-214-1-VJ

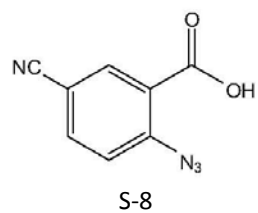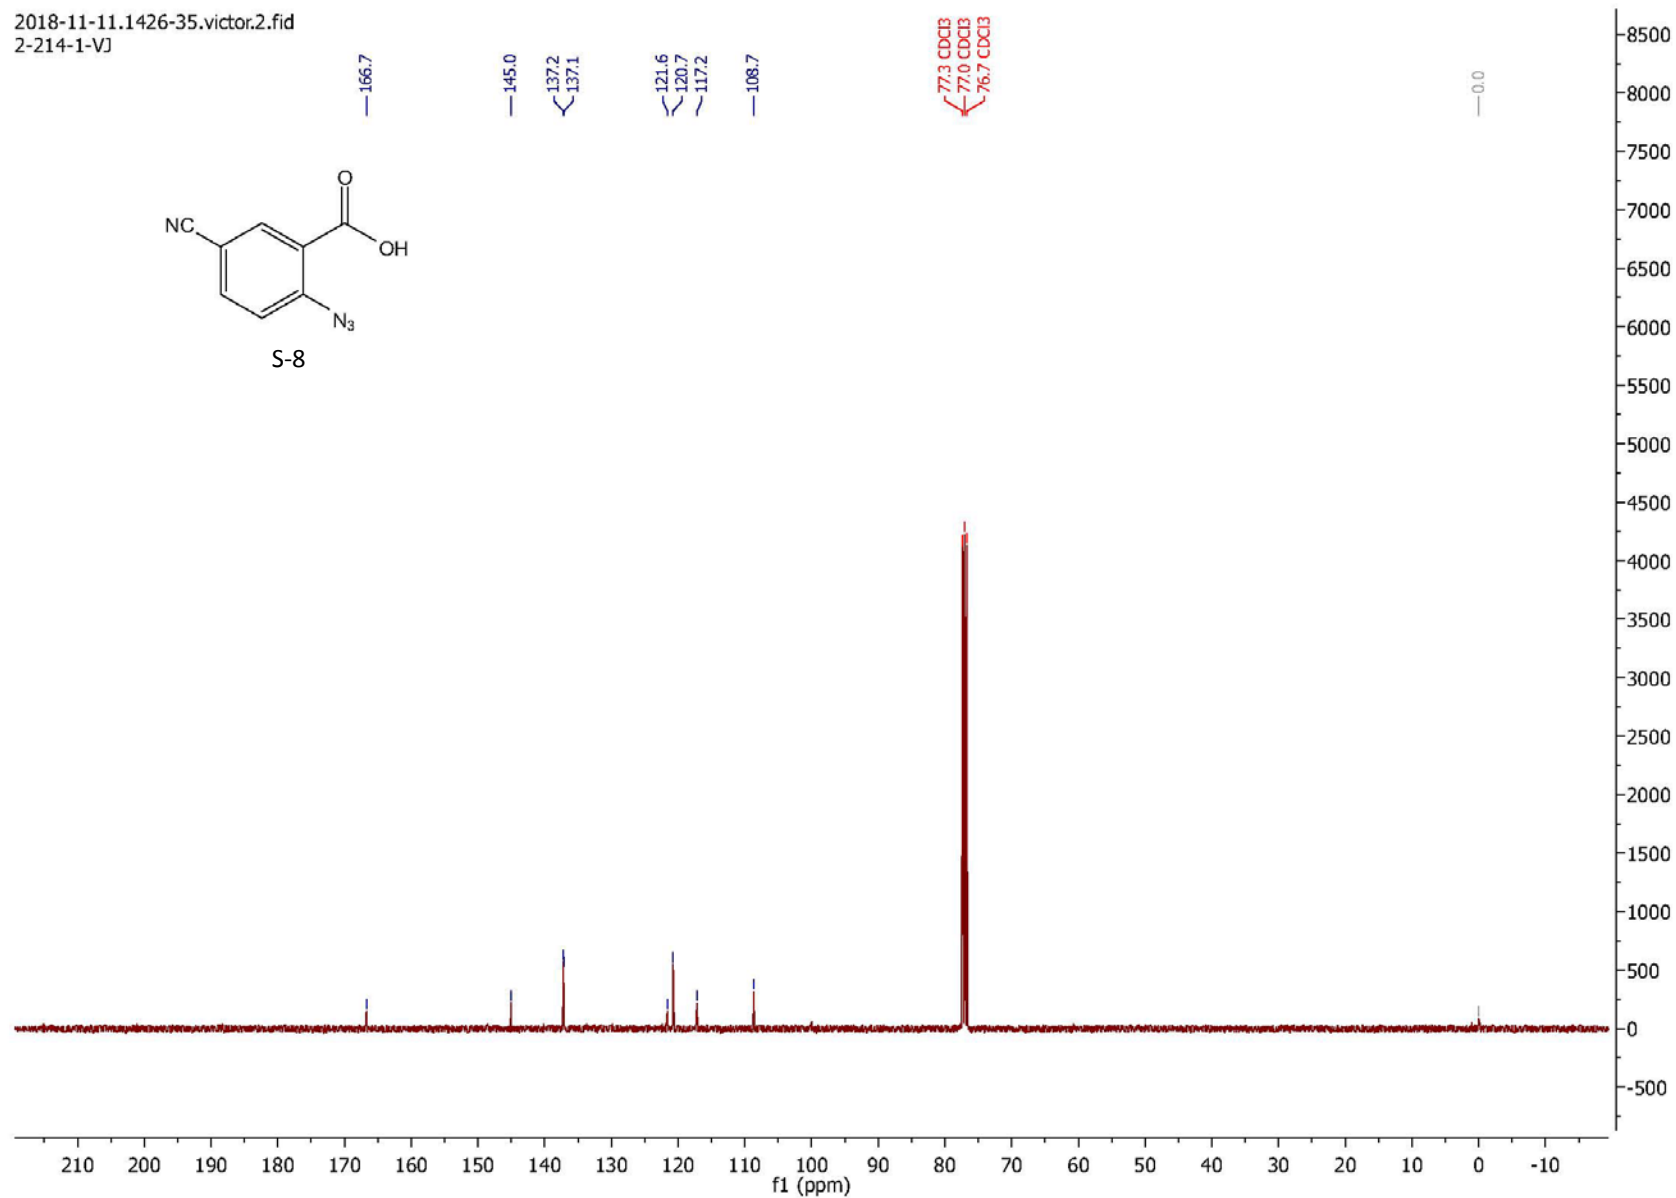

2018-11-13.1927-50.victor.1.fid  
2-224-1-VJ

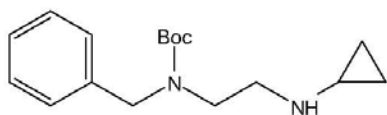

**S-14**

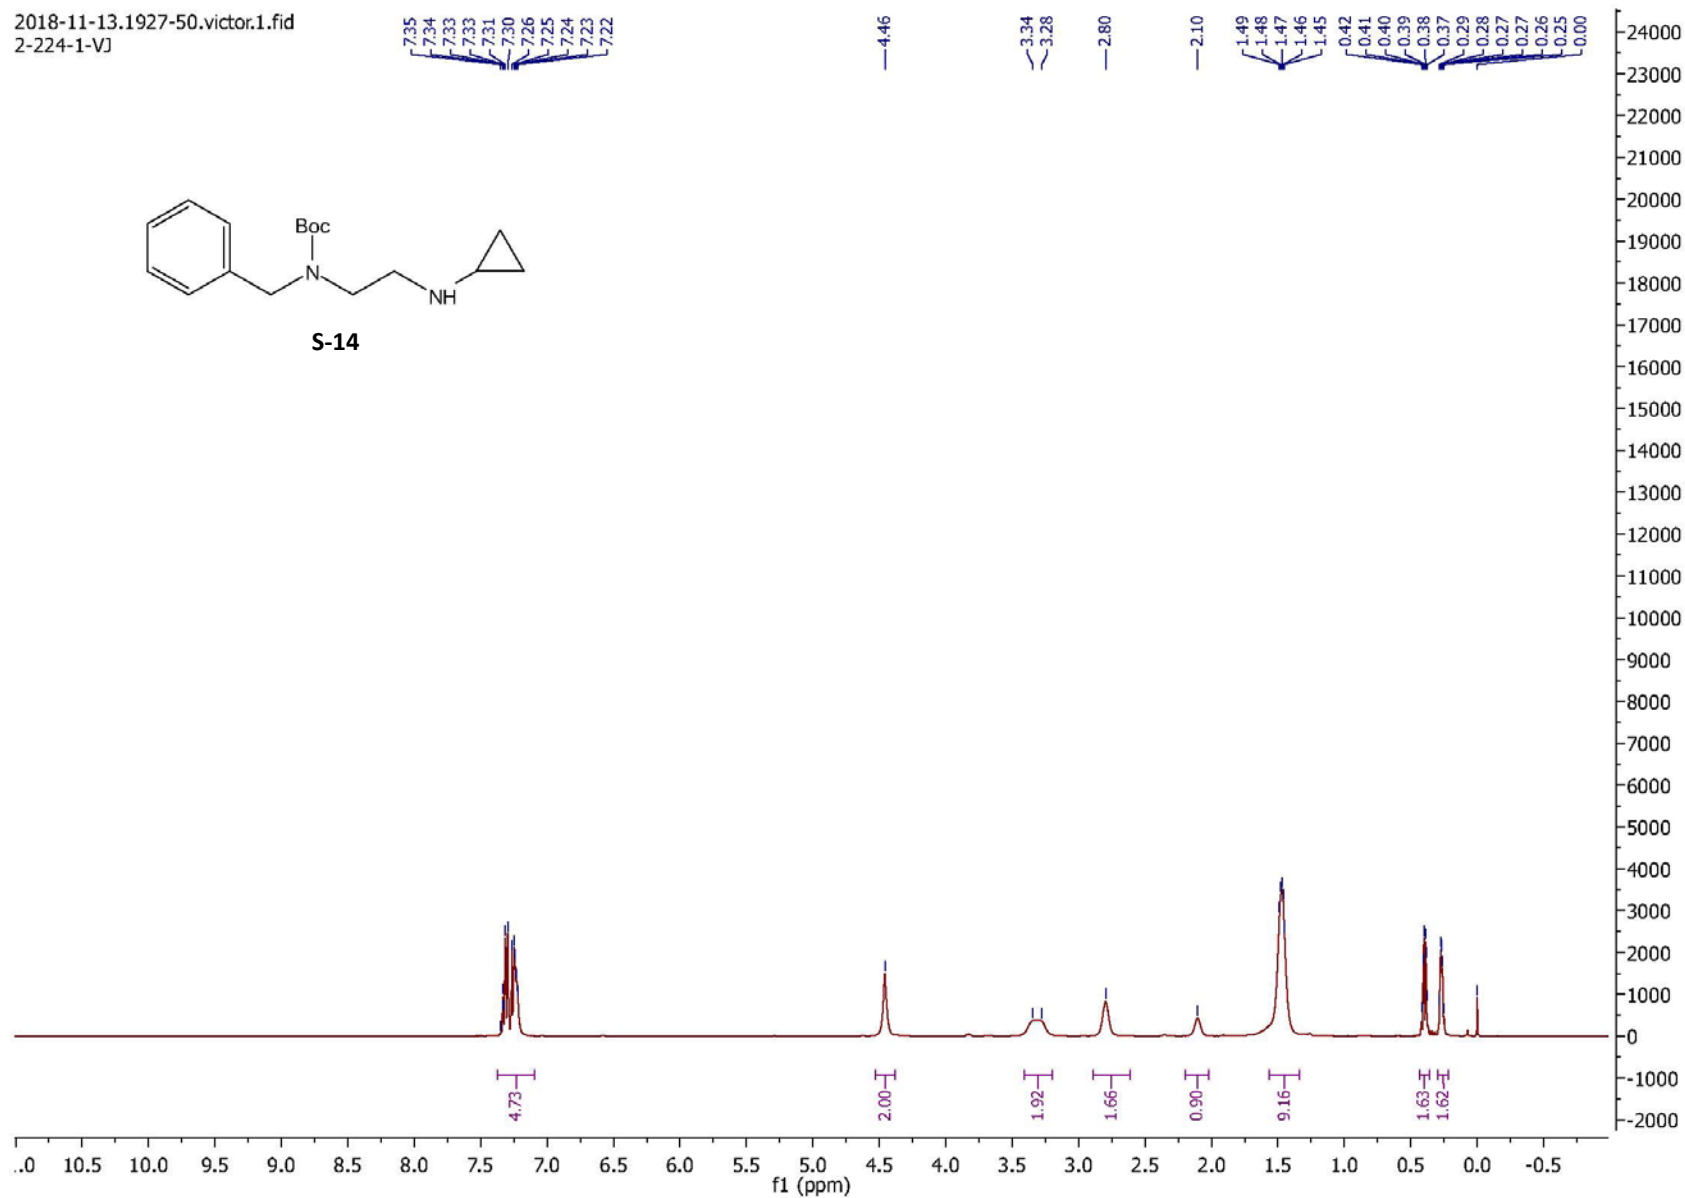

2018-11-13.1927-50.victor.2.fid  
2-224-1-VJ

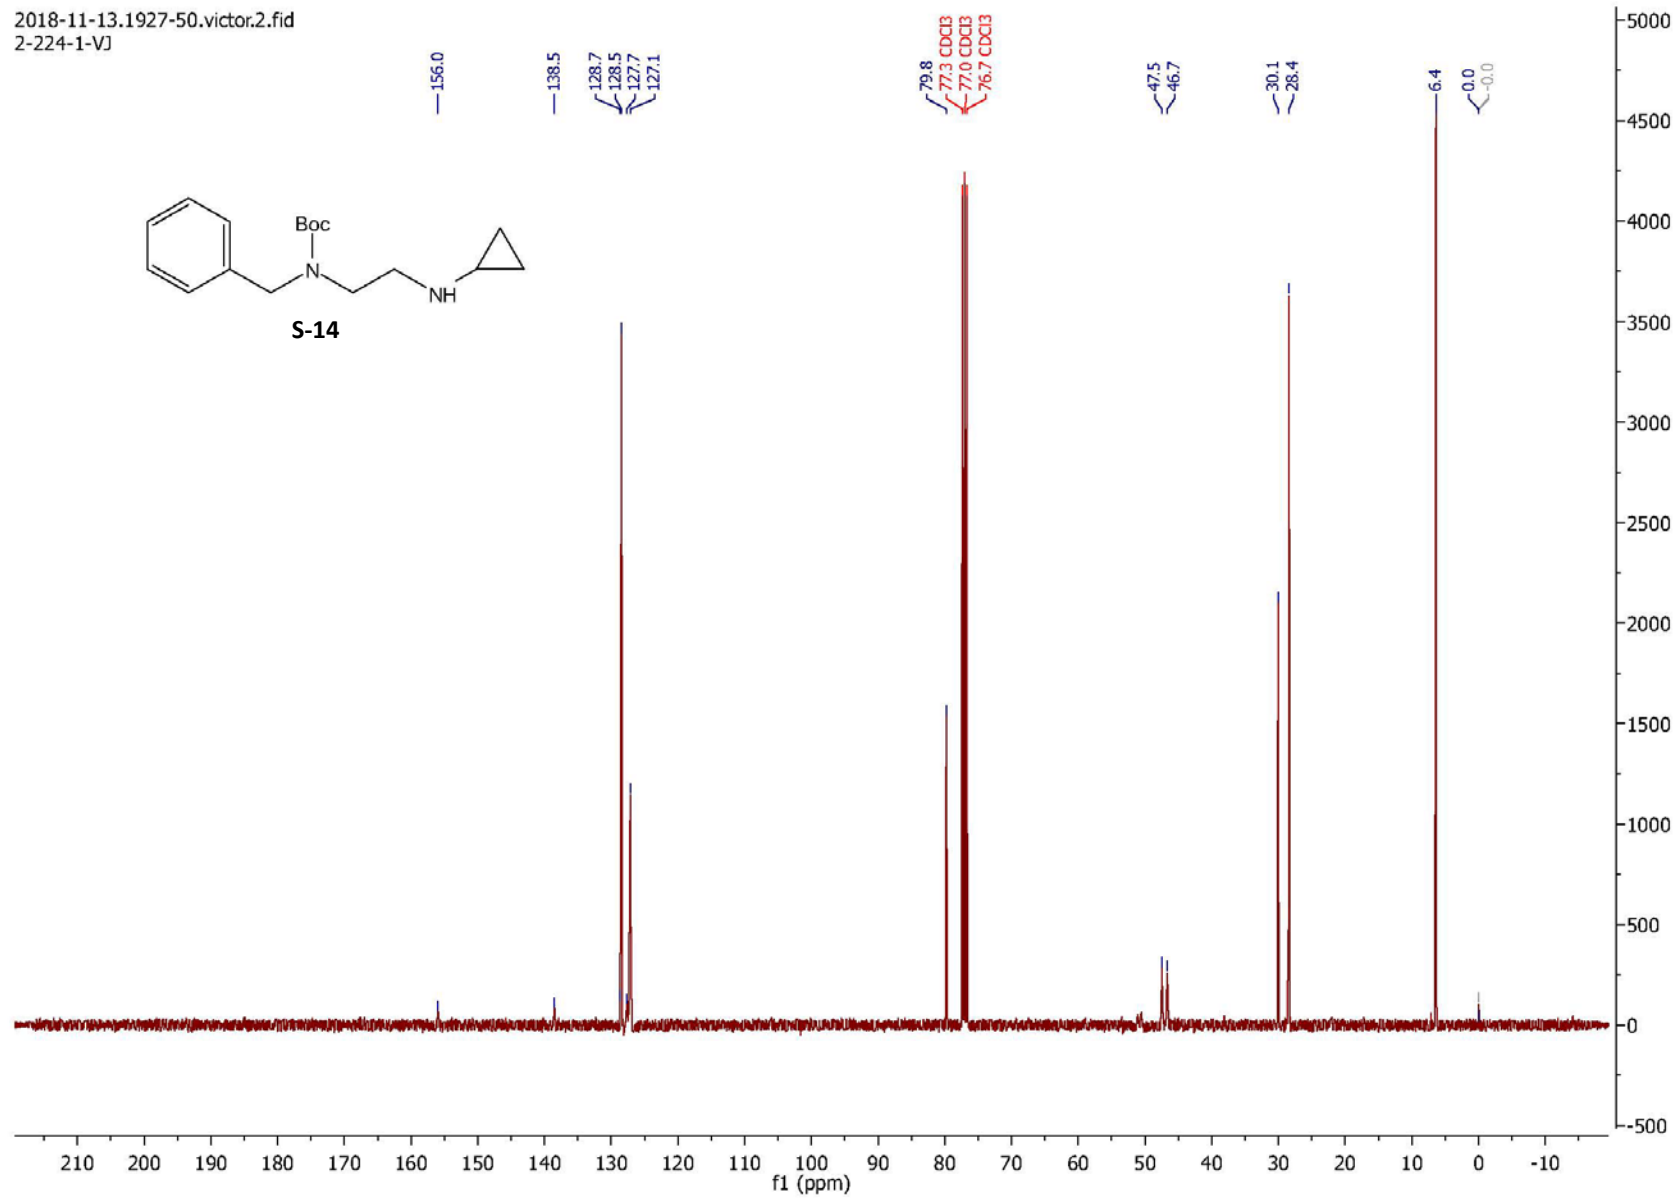

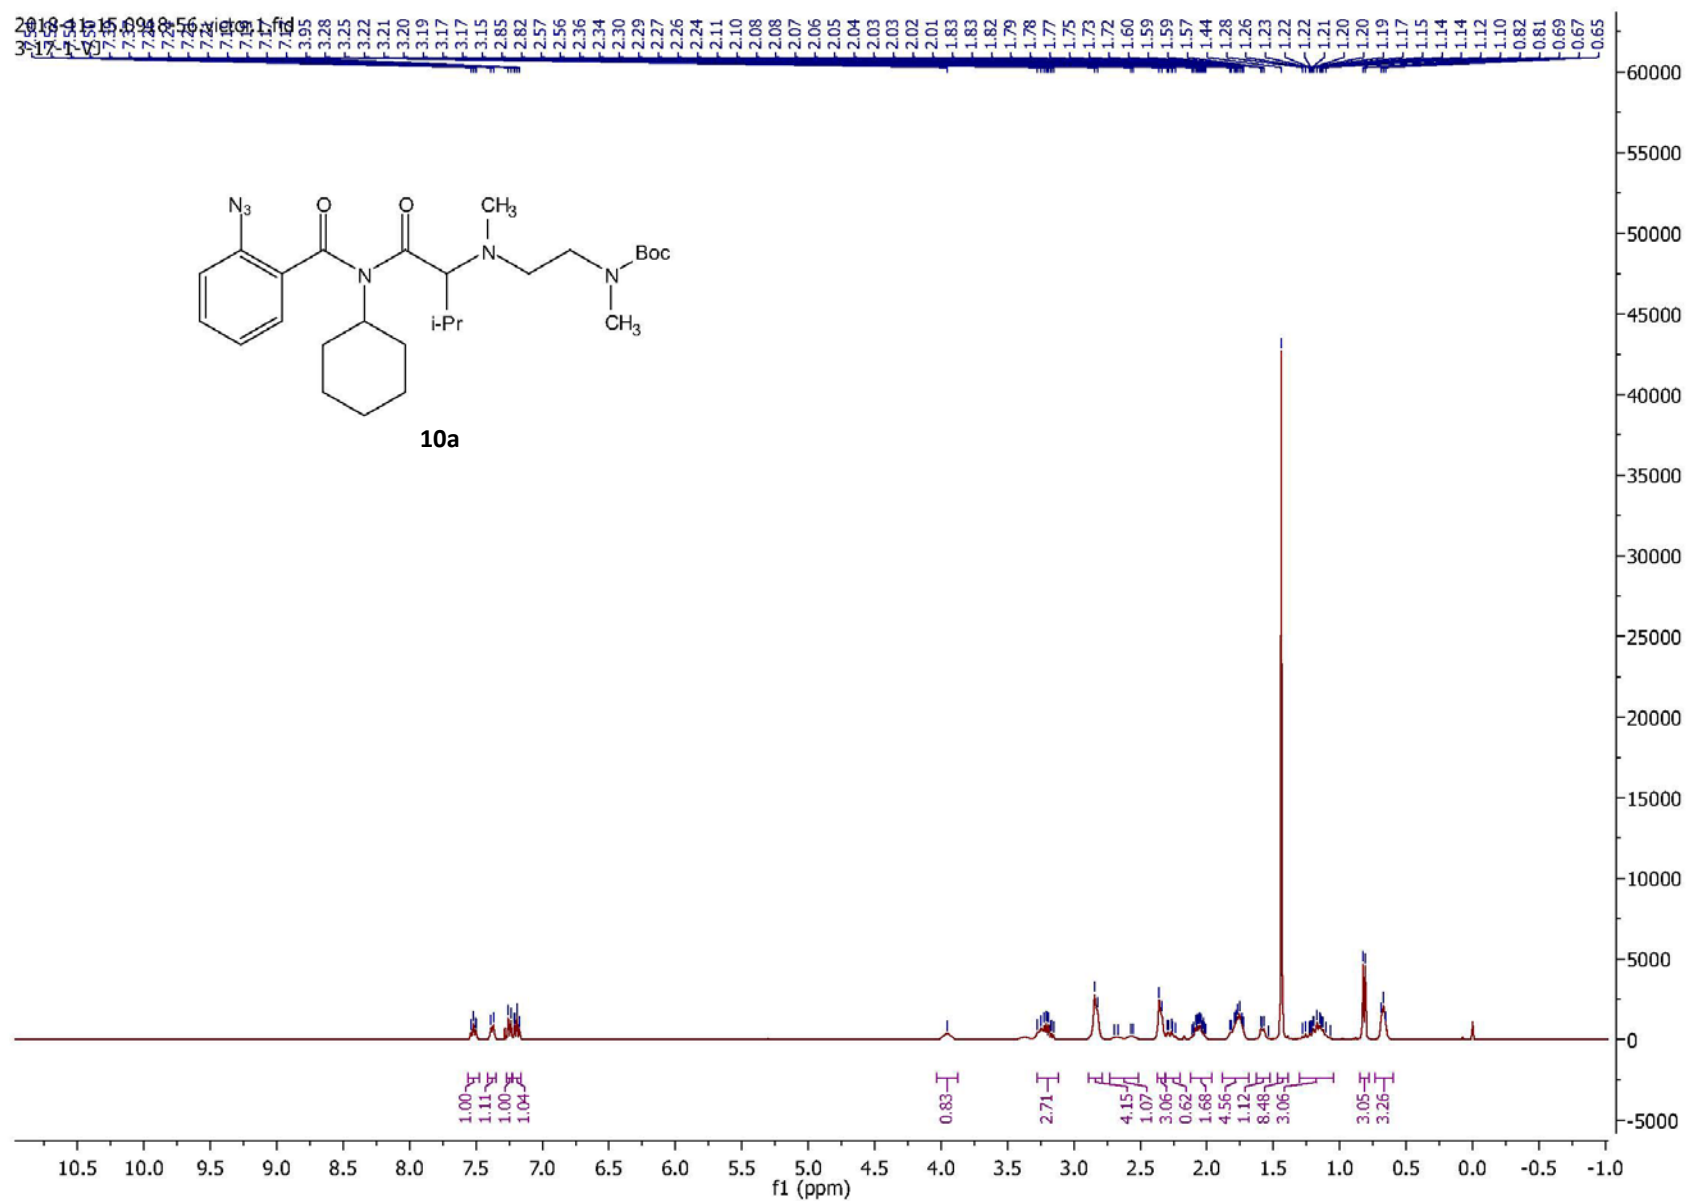

2018-11-15.0918-56.victor.2.fid  
3-17-1-VJ

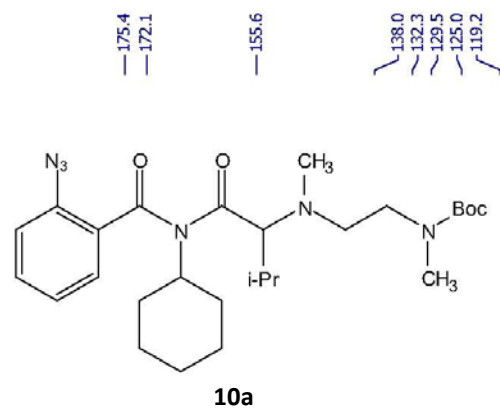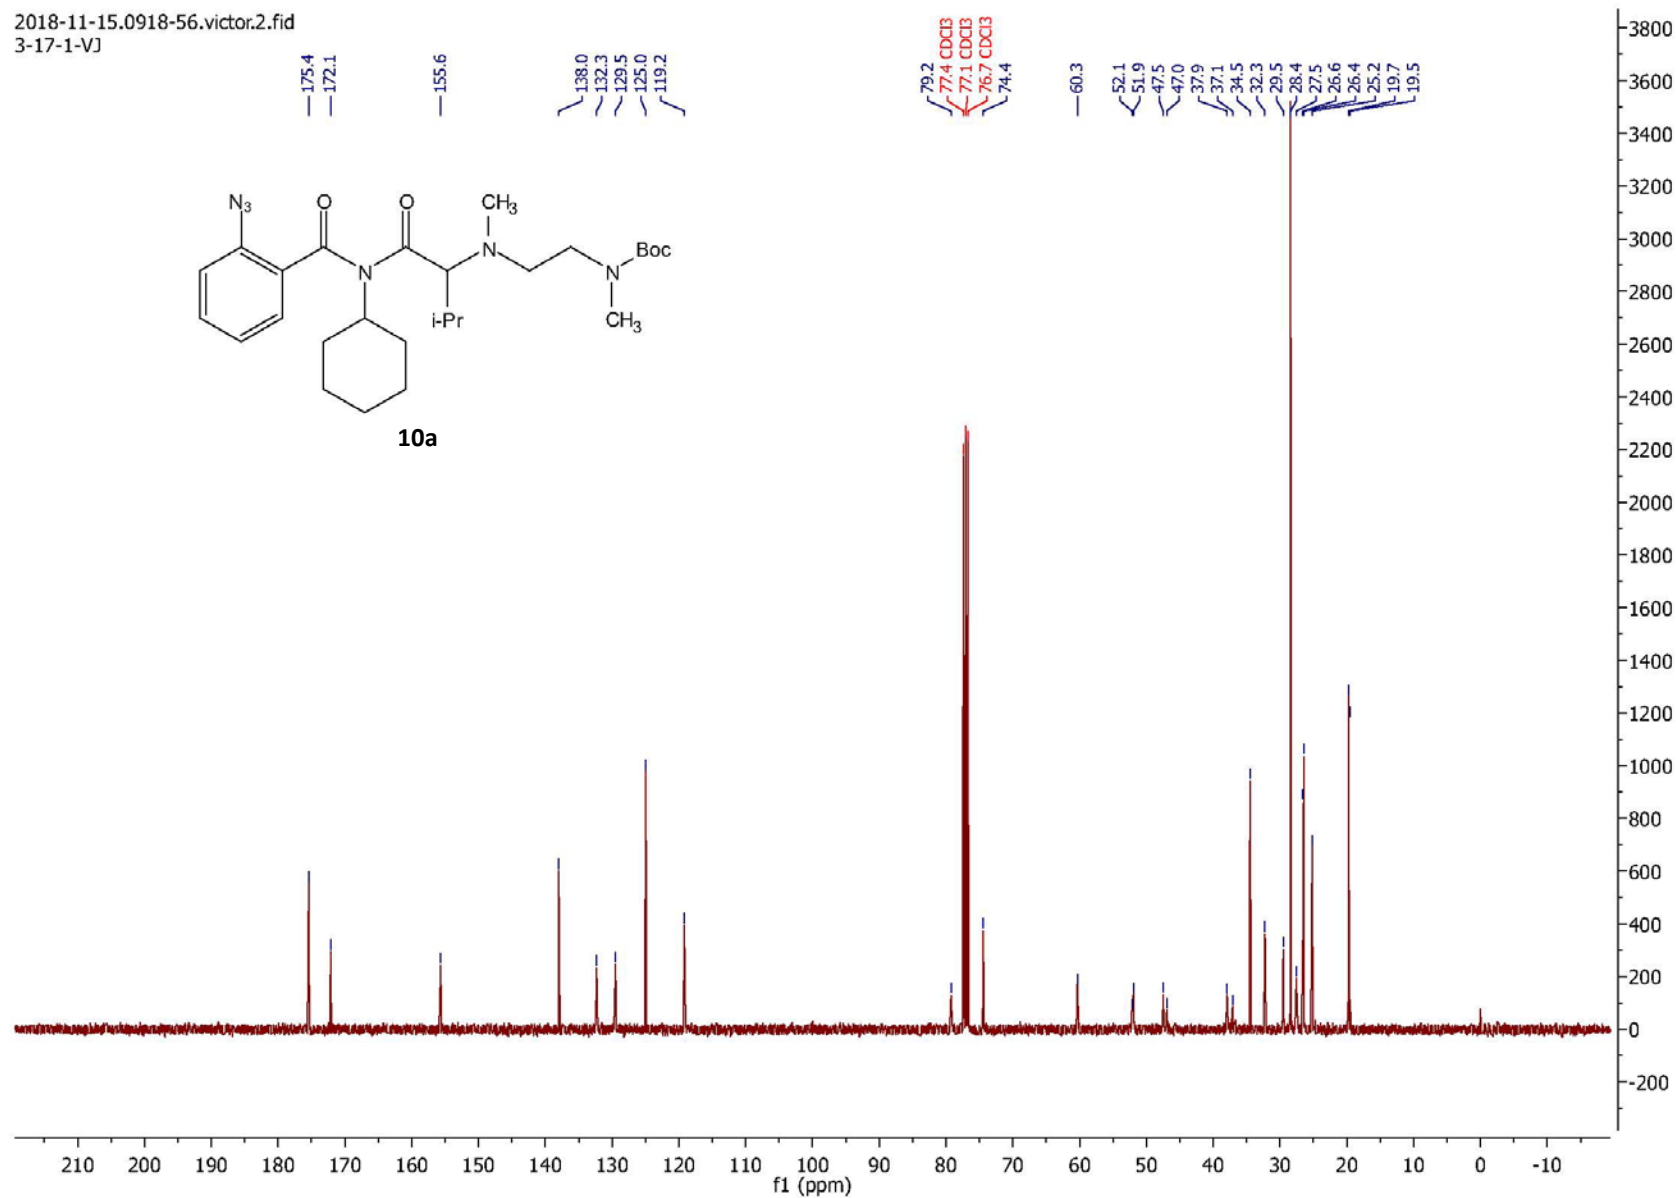

2018-11-15.0919-59  
3-141-A-VJ

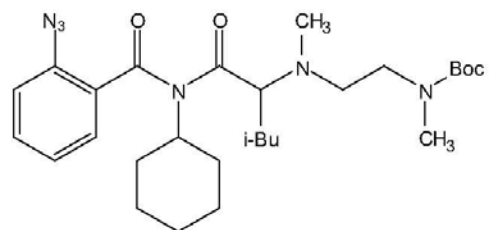

**10b**

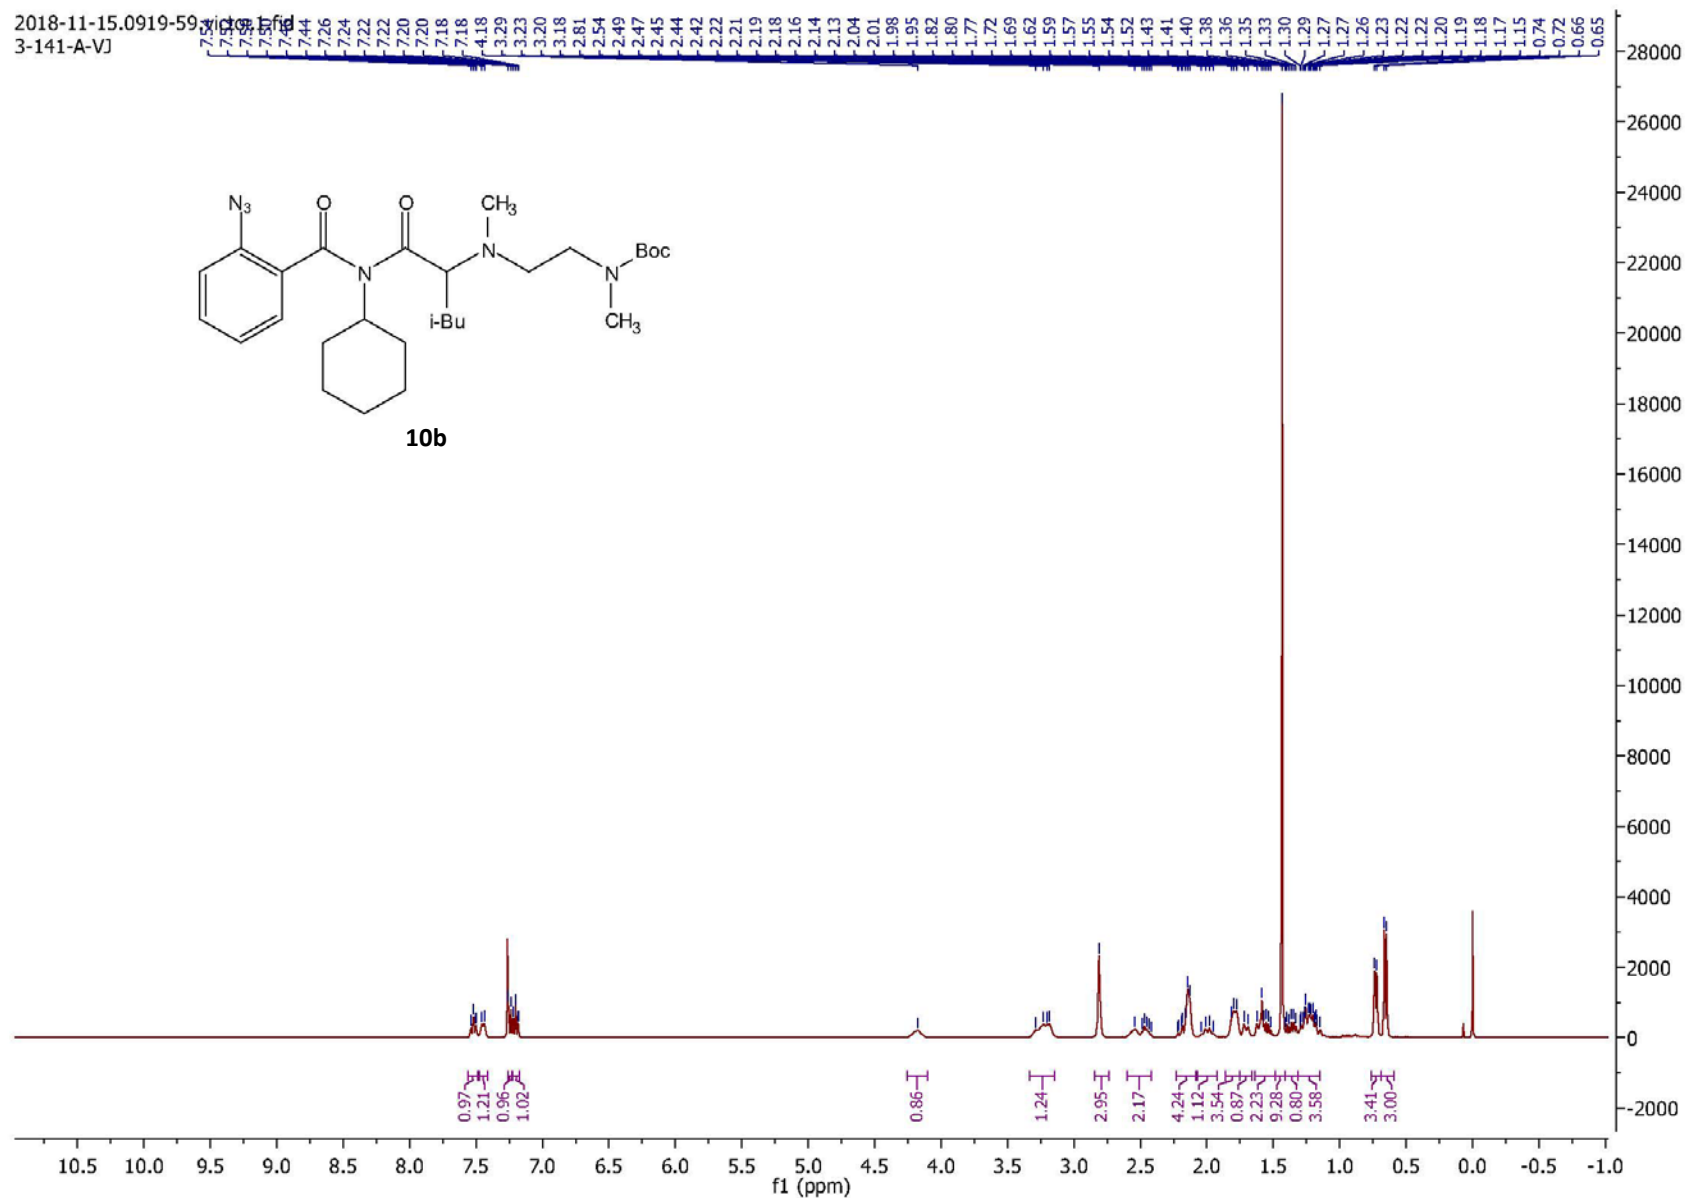

2018-11-15.0919-59.victor.3.fid  
3-141-A-VJ



**10b**

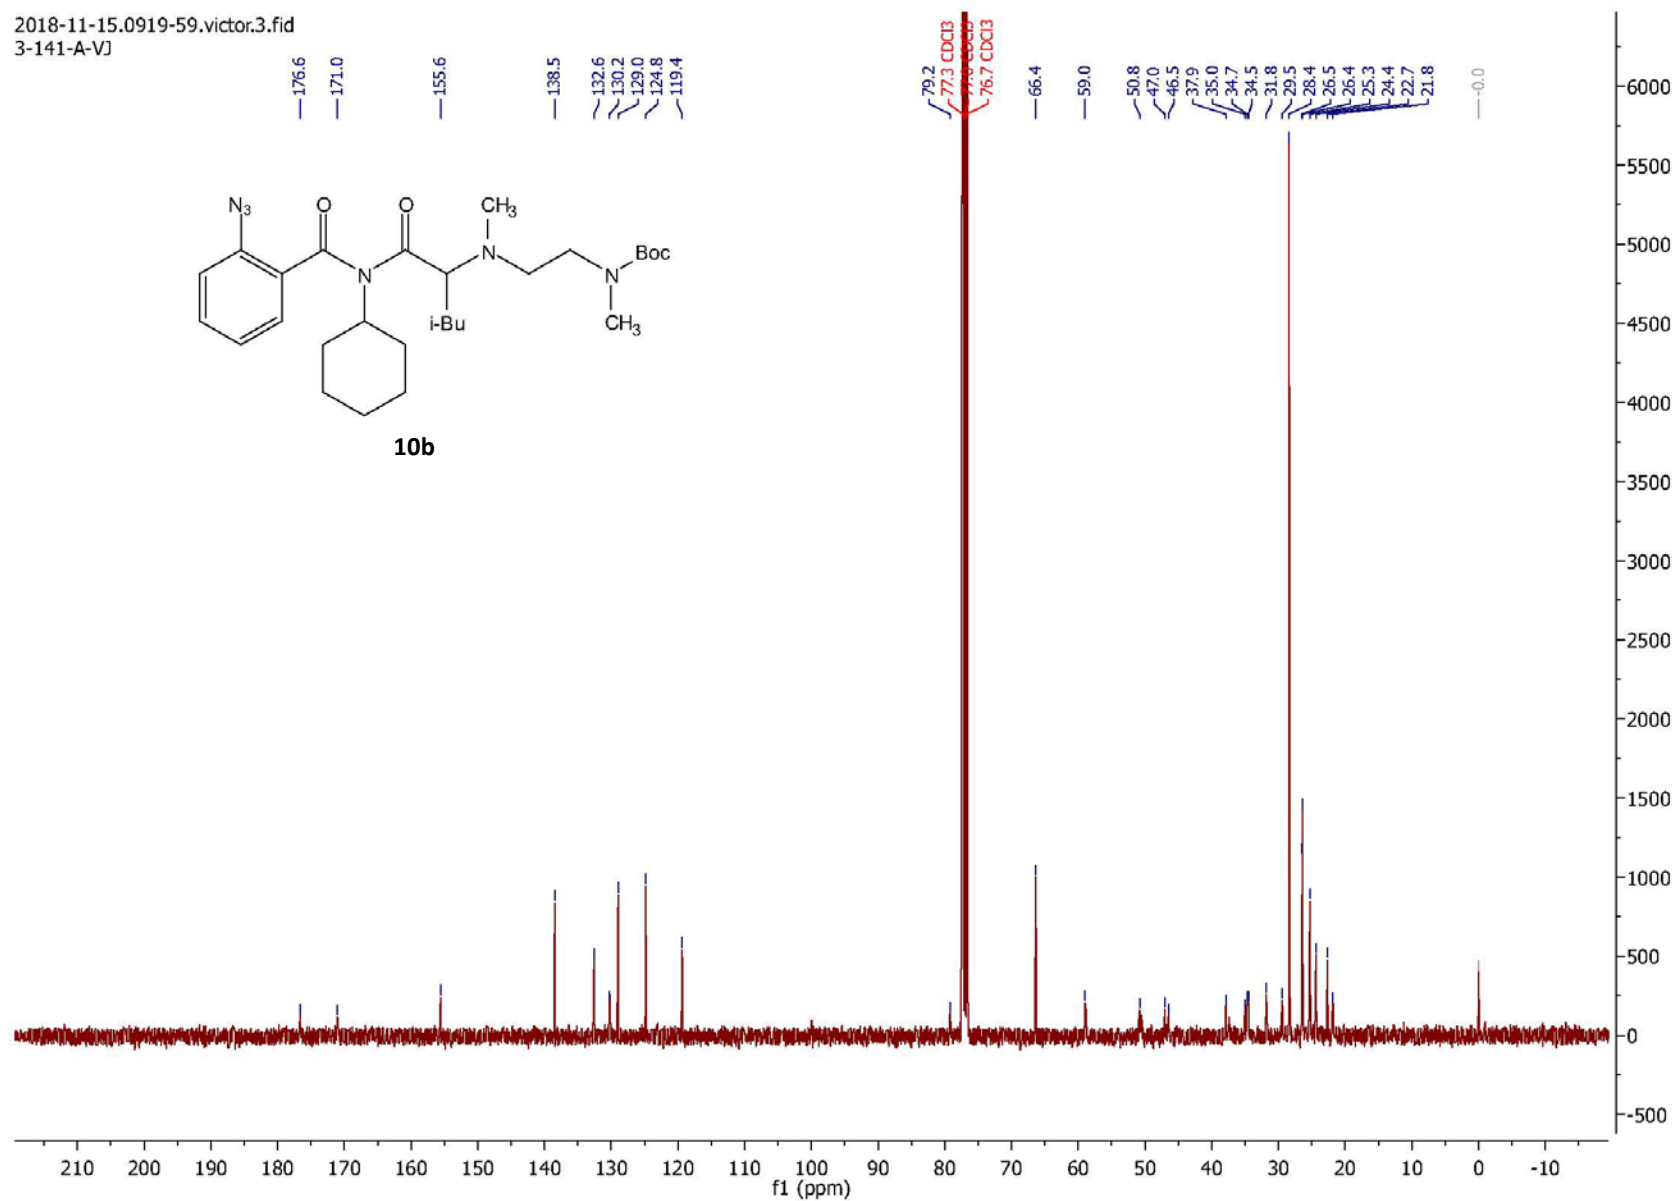

2018-11-16.1431-7.vic  
3-32-1-V]

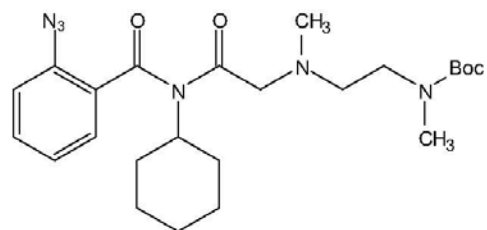

**10c**

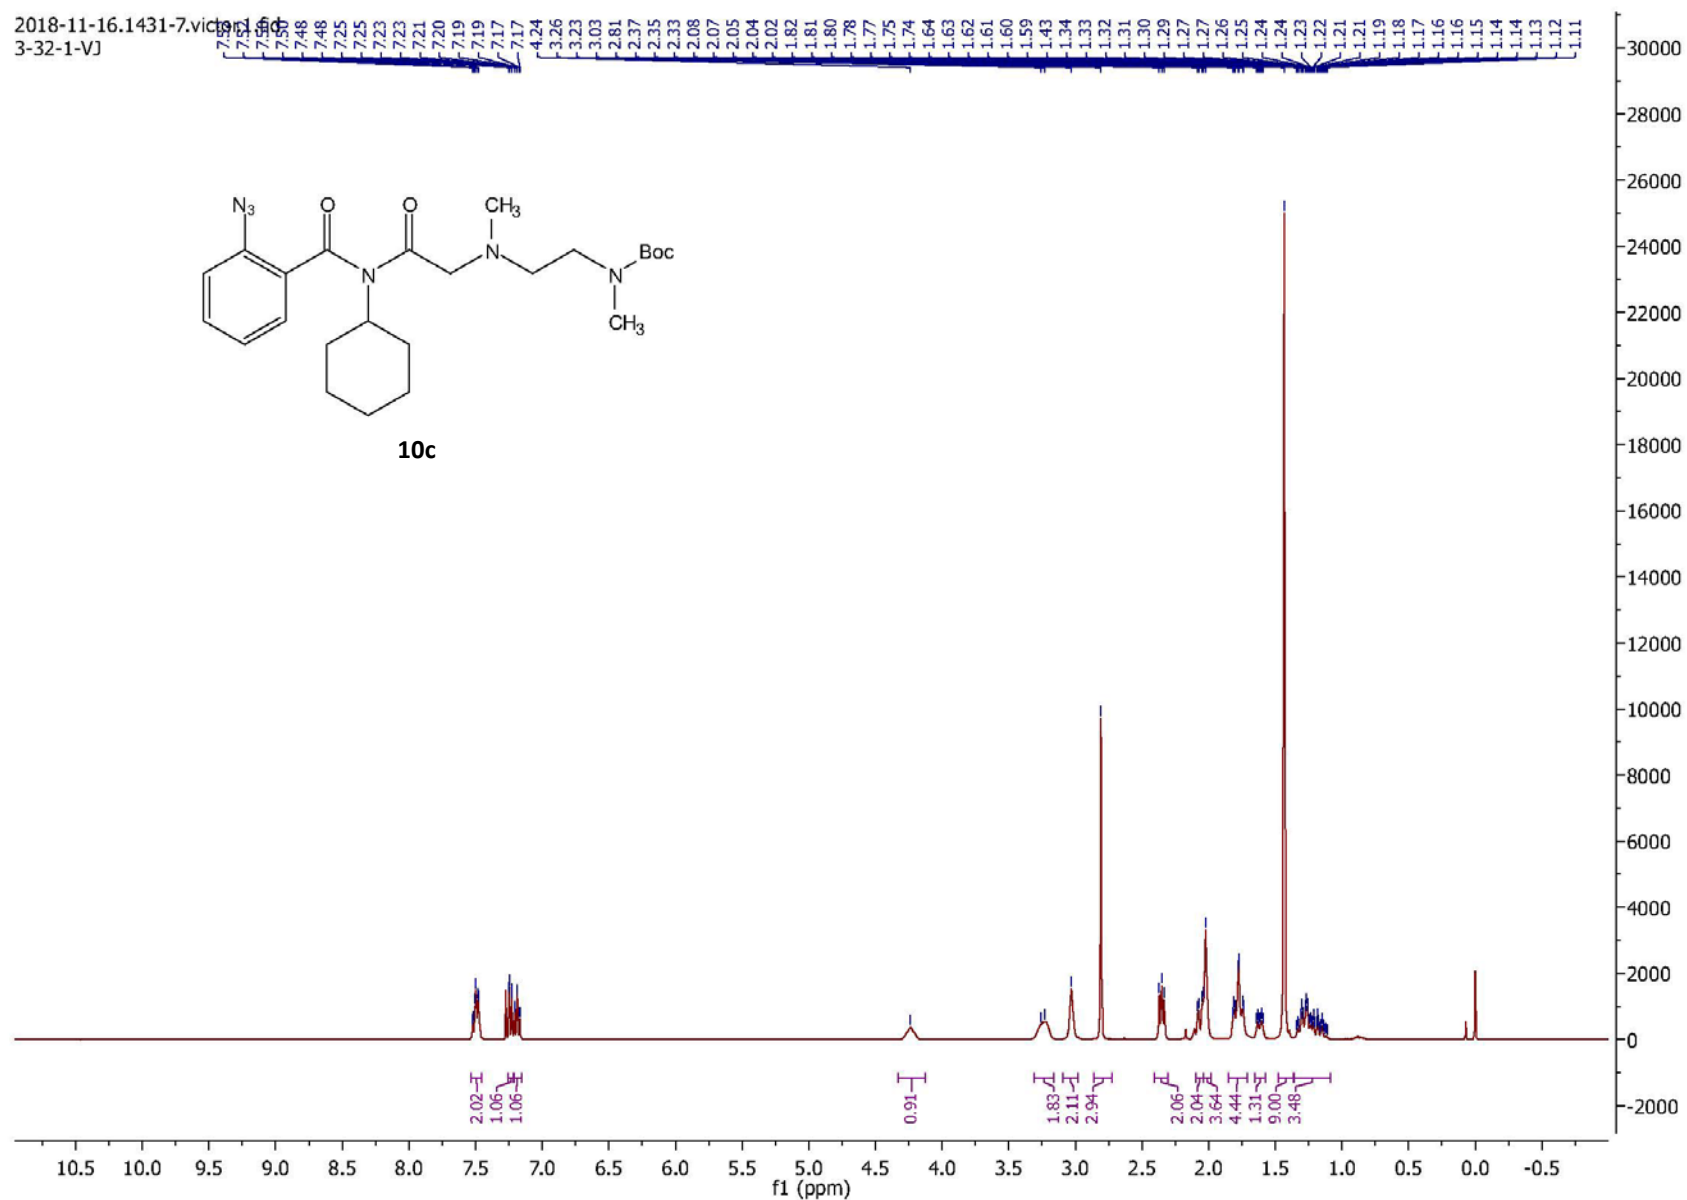



2018-11-16.1431-7.victor.2.fid  
3-32-1-VJ

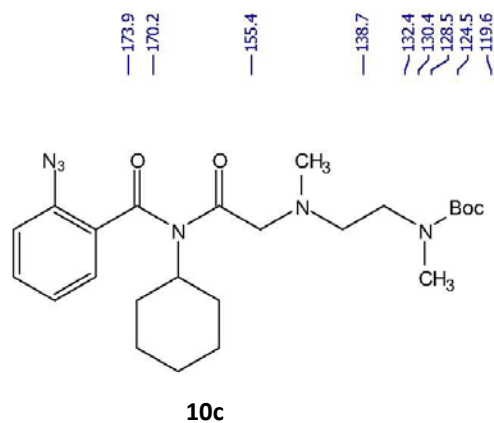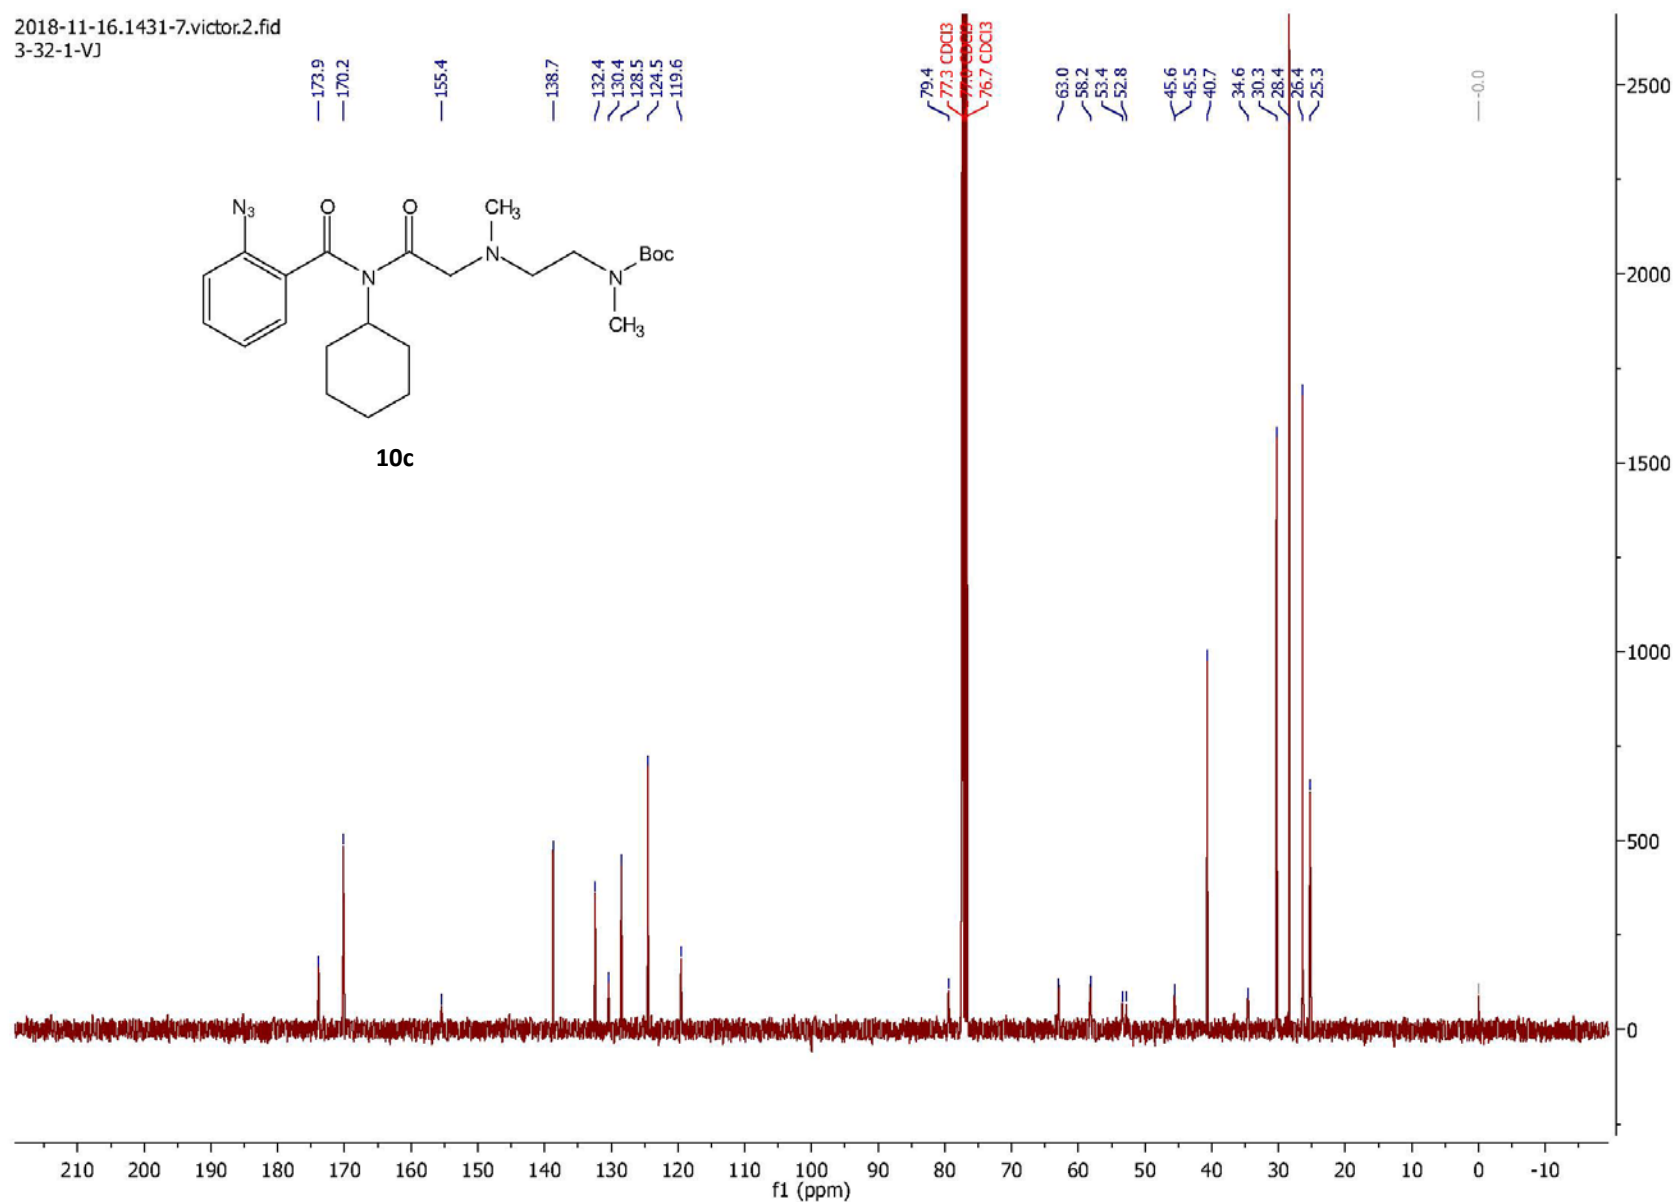

2018-11-15.0919-57.victor.1.fid  
3-23-A-VJ

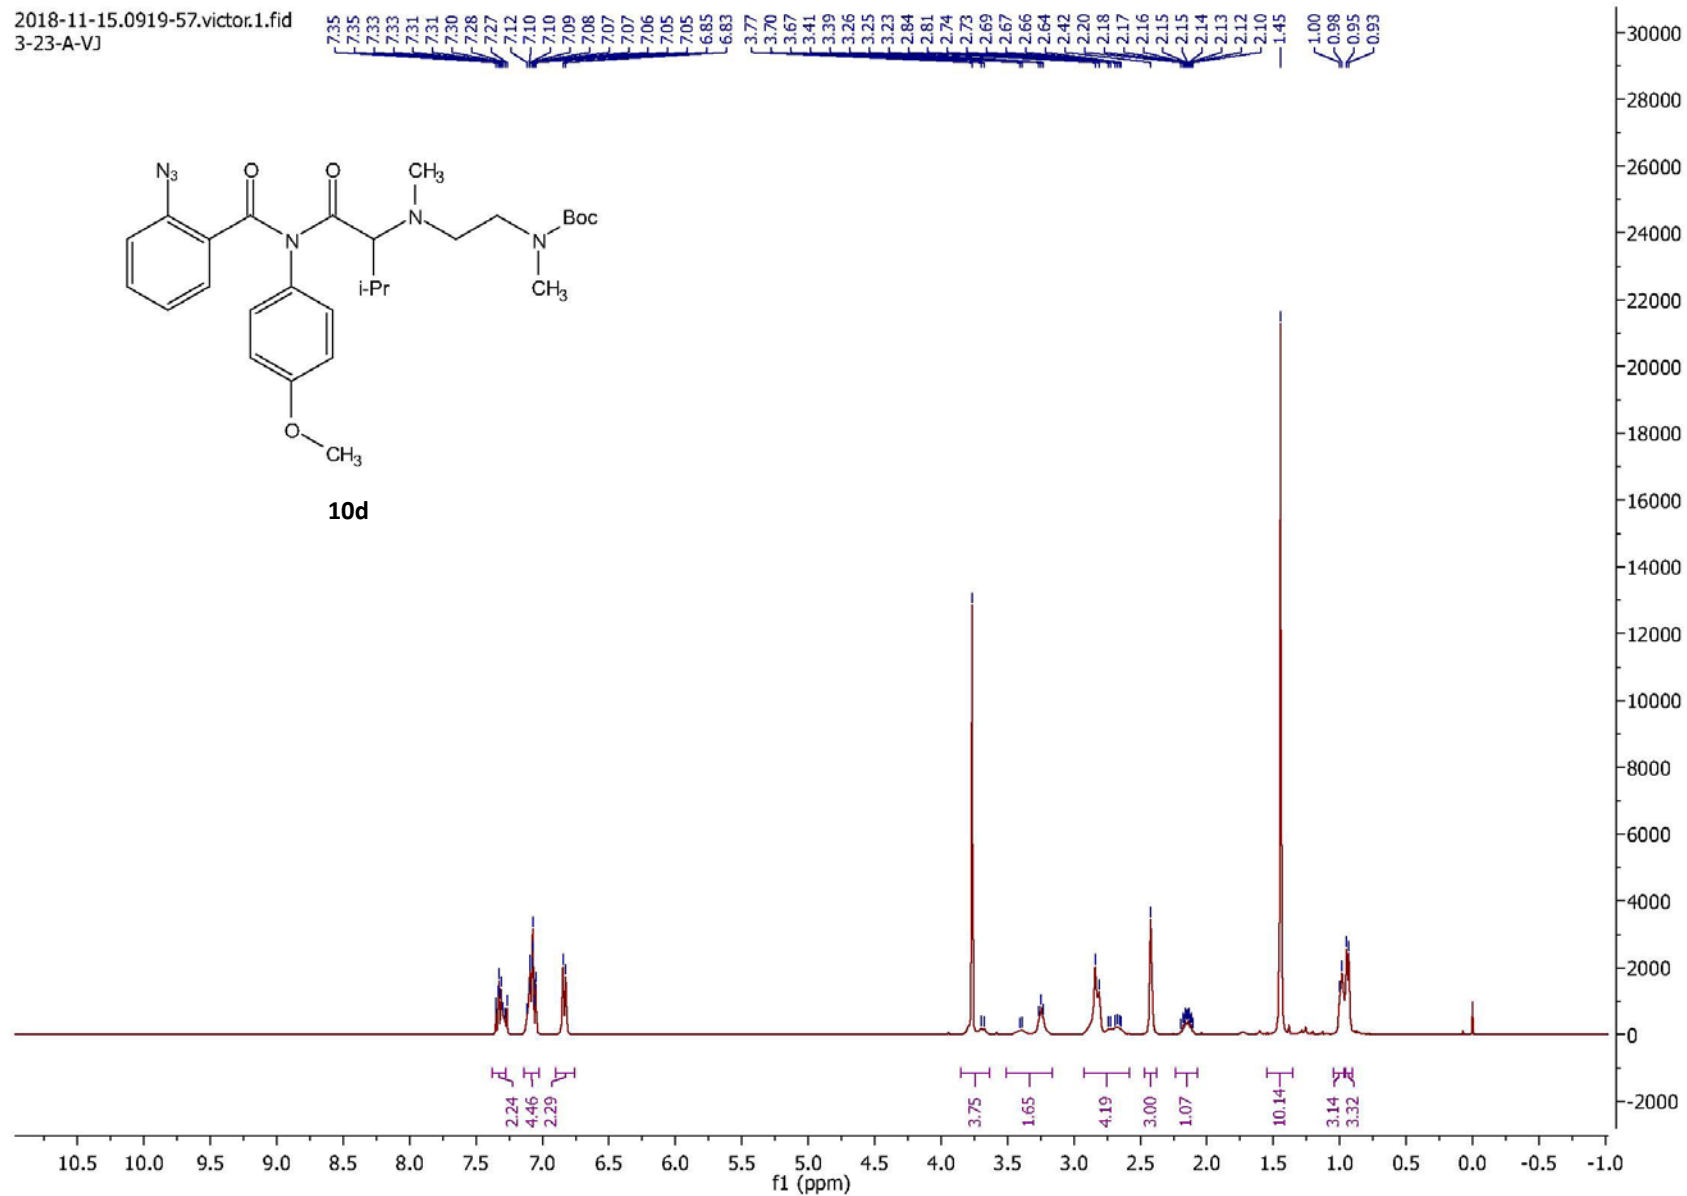

2018-11-15.0919-57.victor.2.fid  
3-23-A-VJ

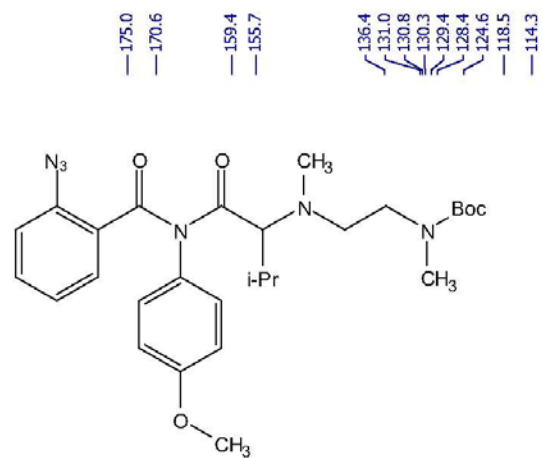

**10d**

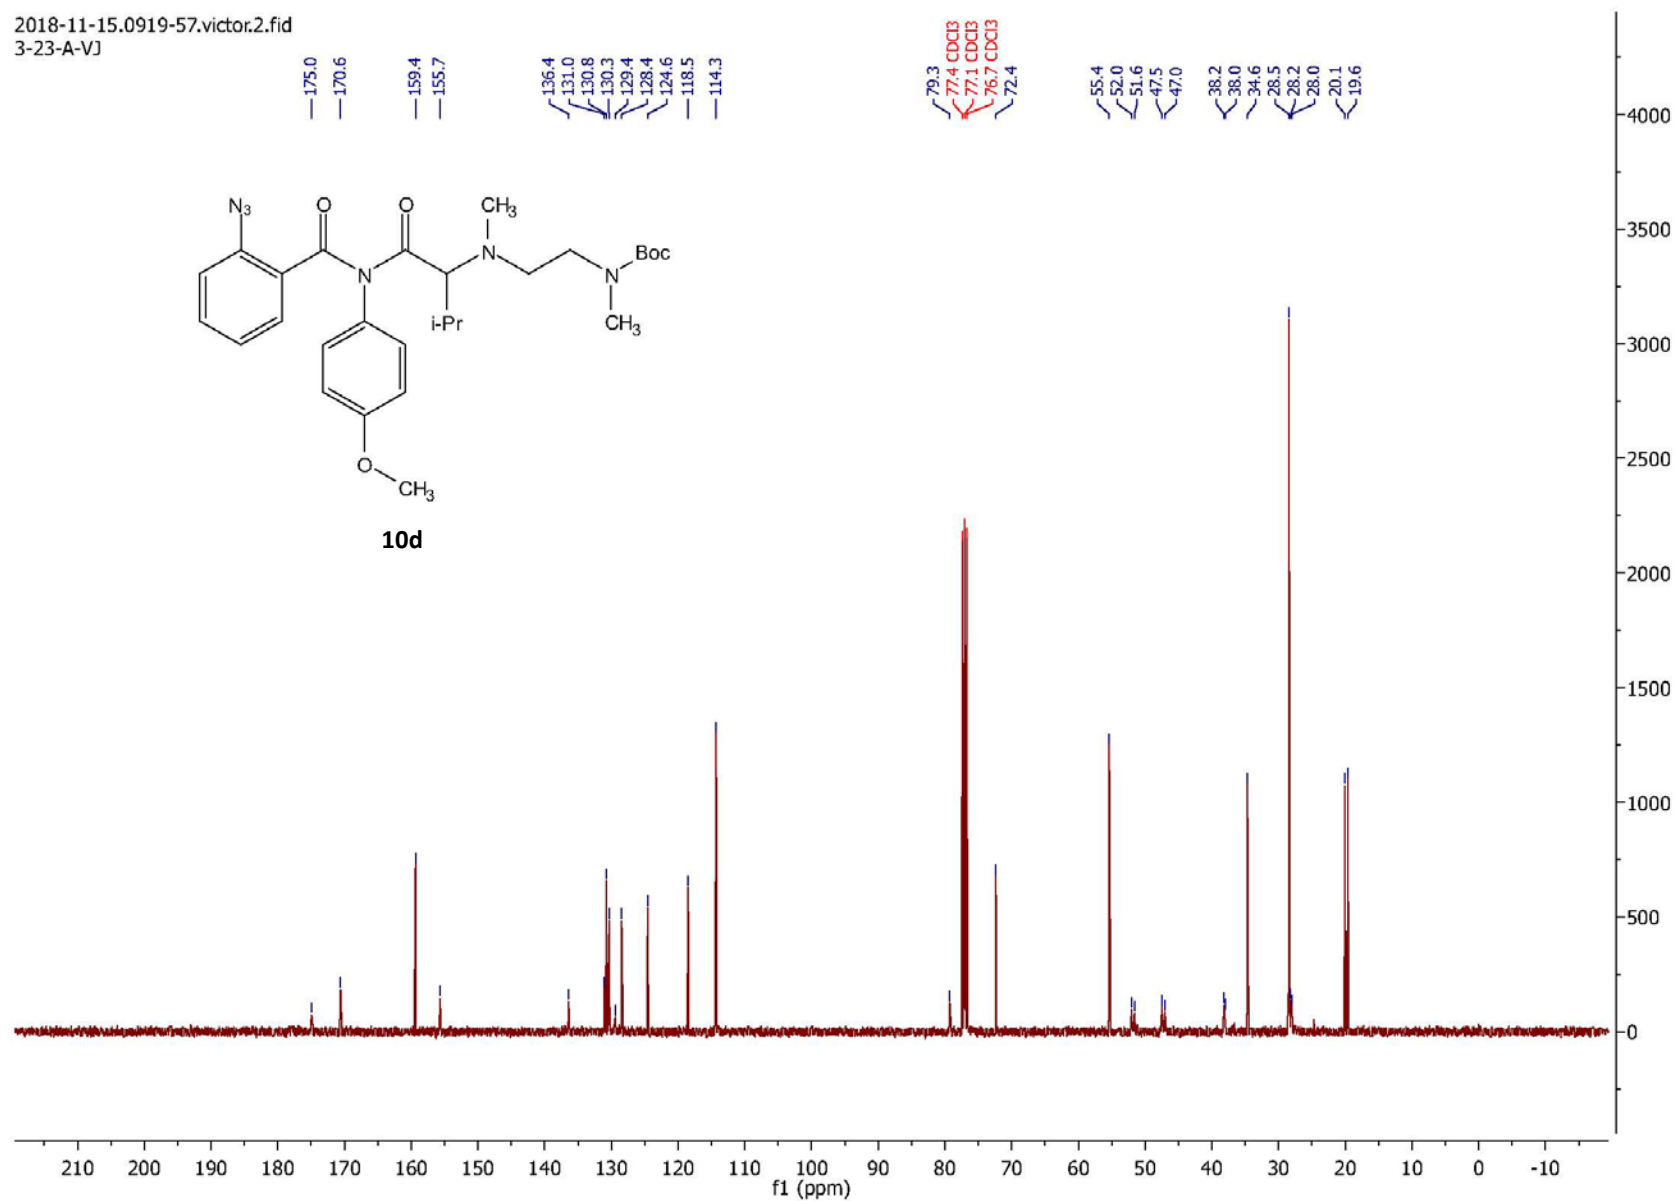

2018-11-15.0919-58.victor.1.fid  
3-47-A-V]

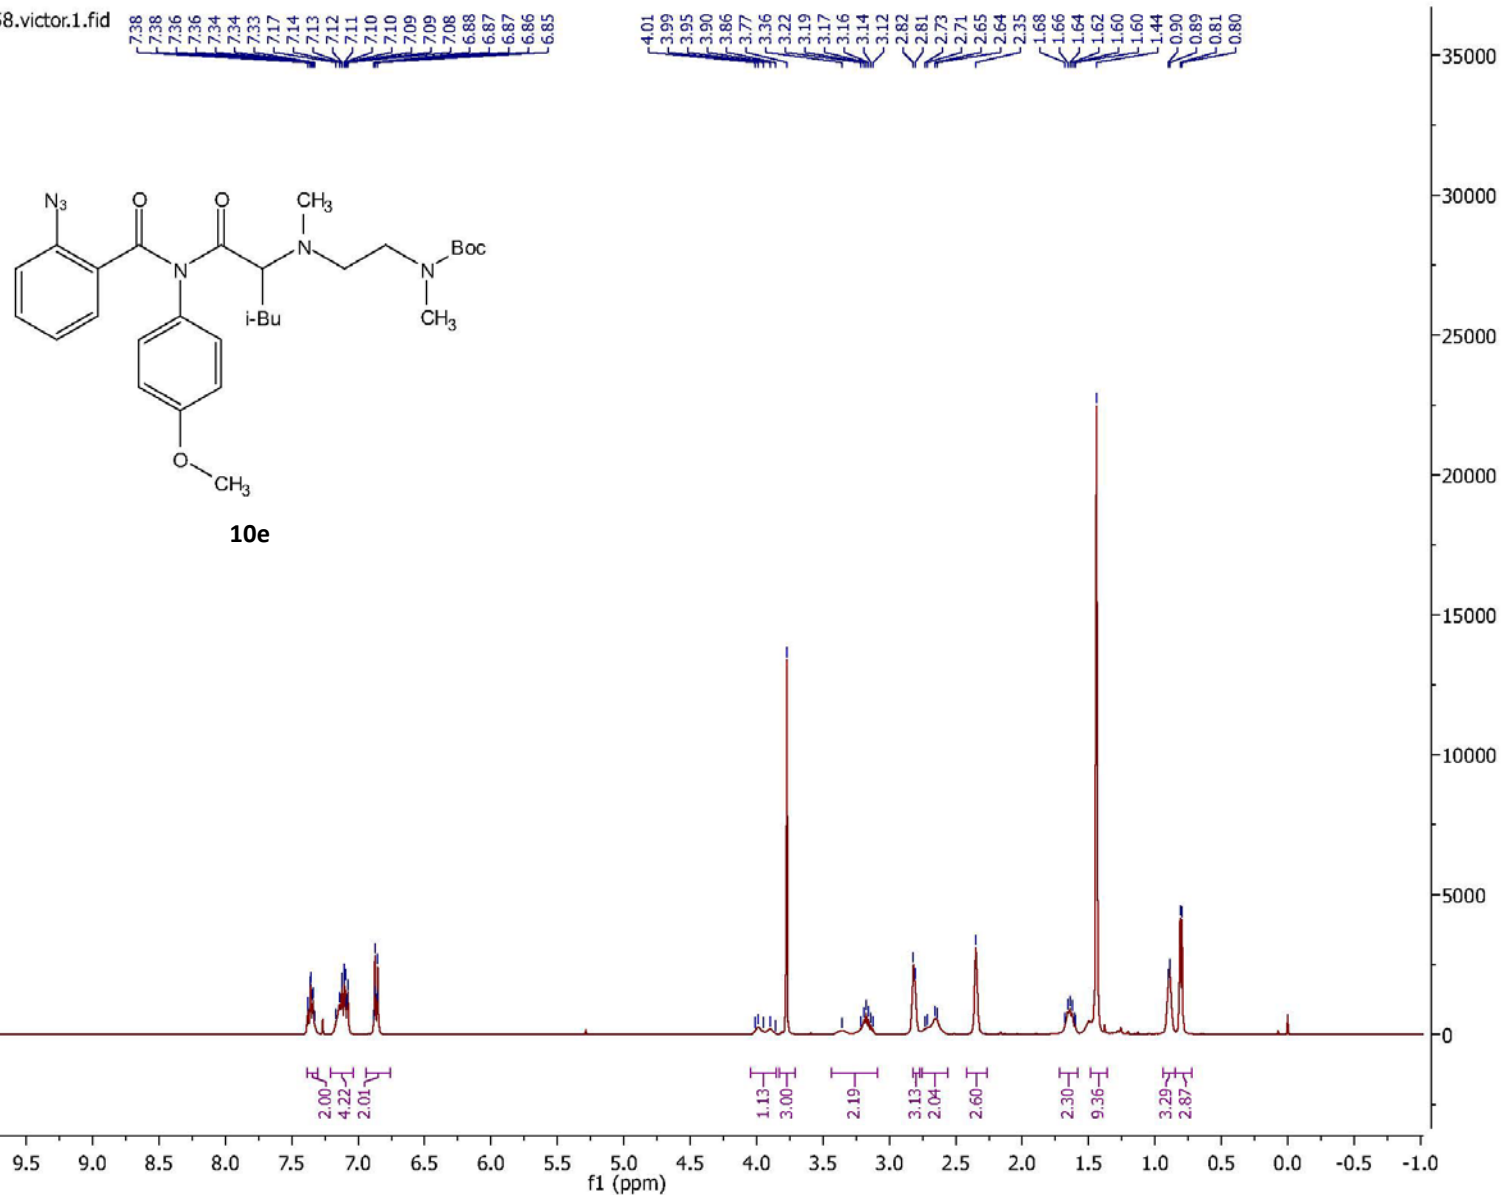

2018-11-15.0919-58.victor.2.fid  
3-47-A-VJ

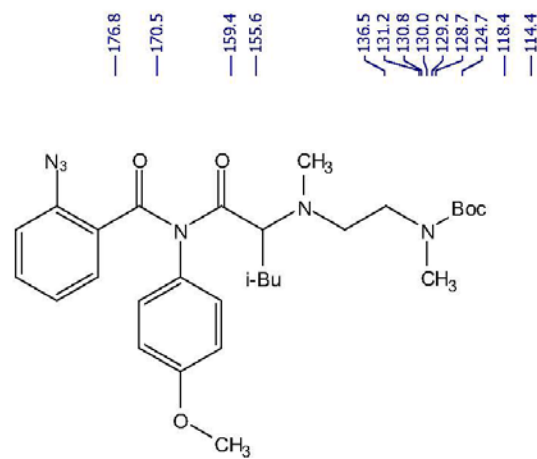

**10e**

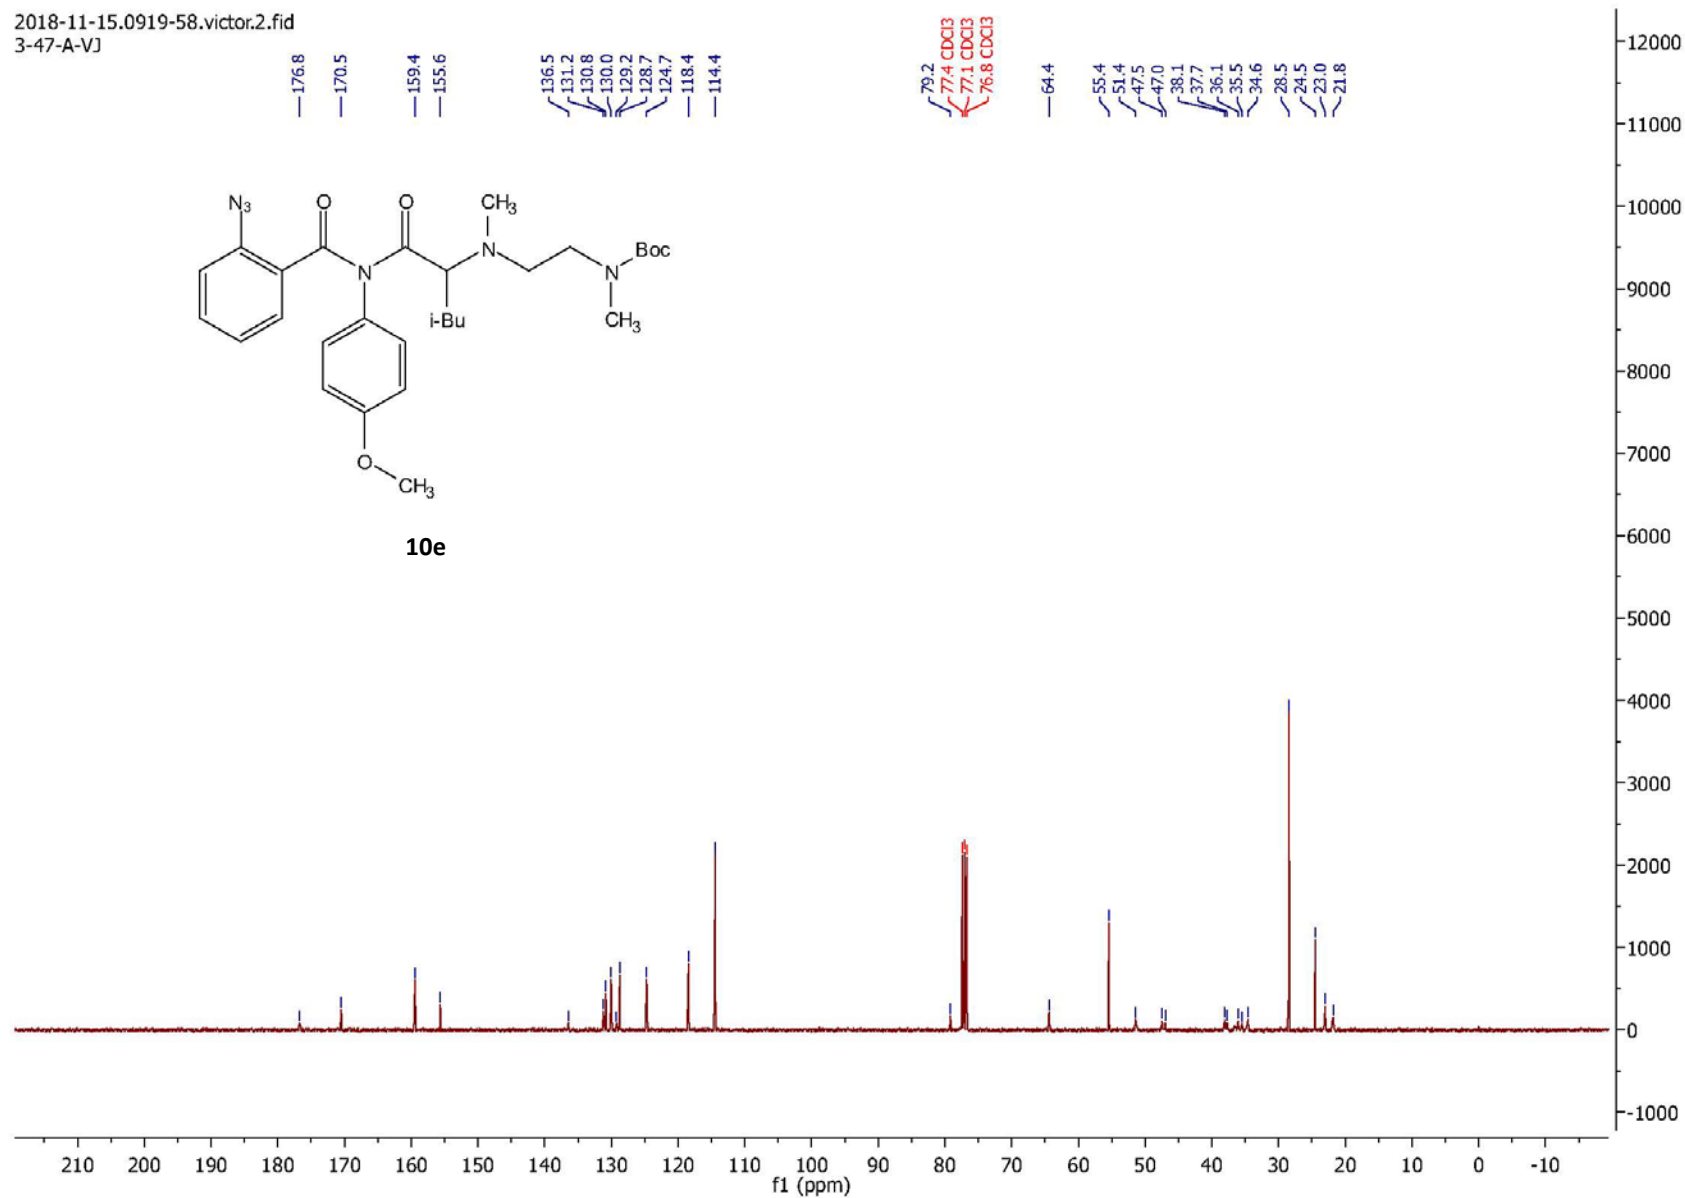

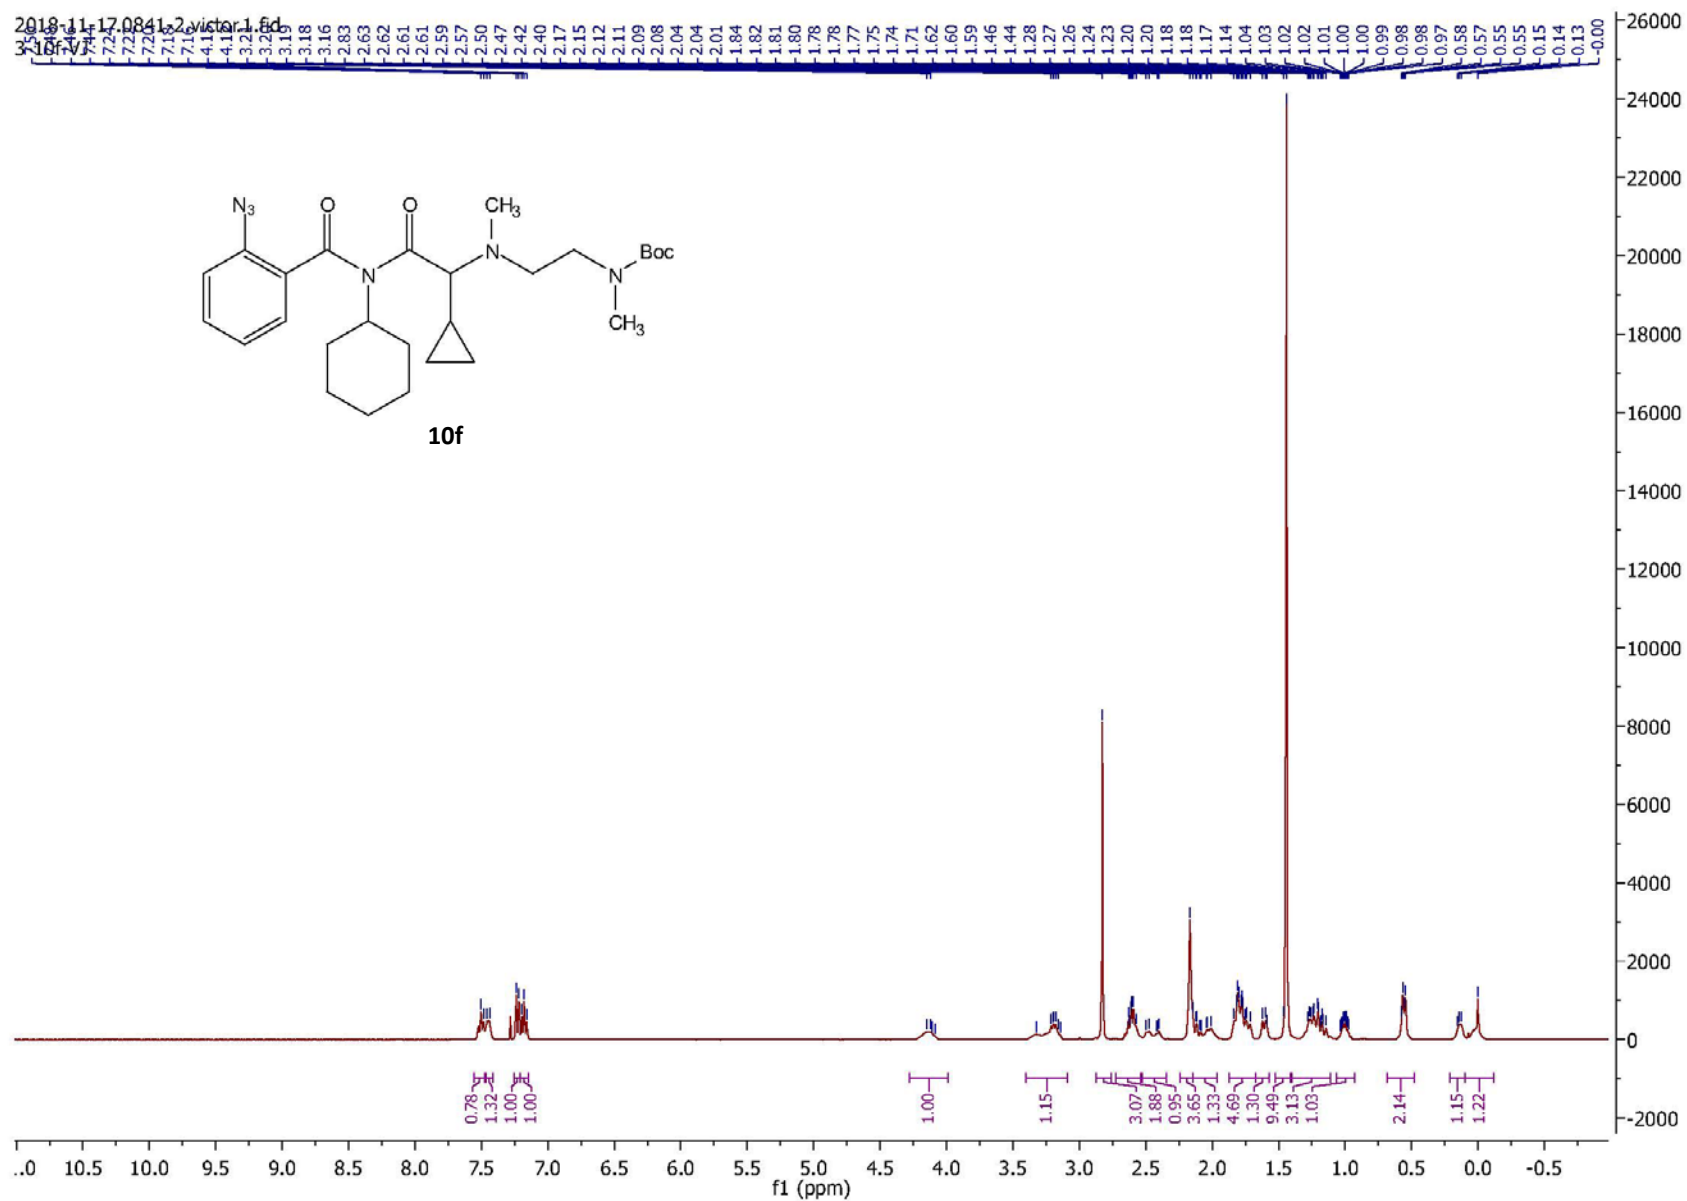

2018-11-17.0841-2.victor.2.fid  
3-10f-VJ

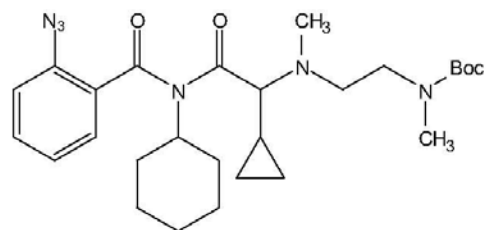

**10f**

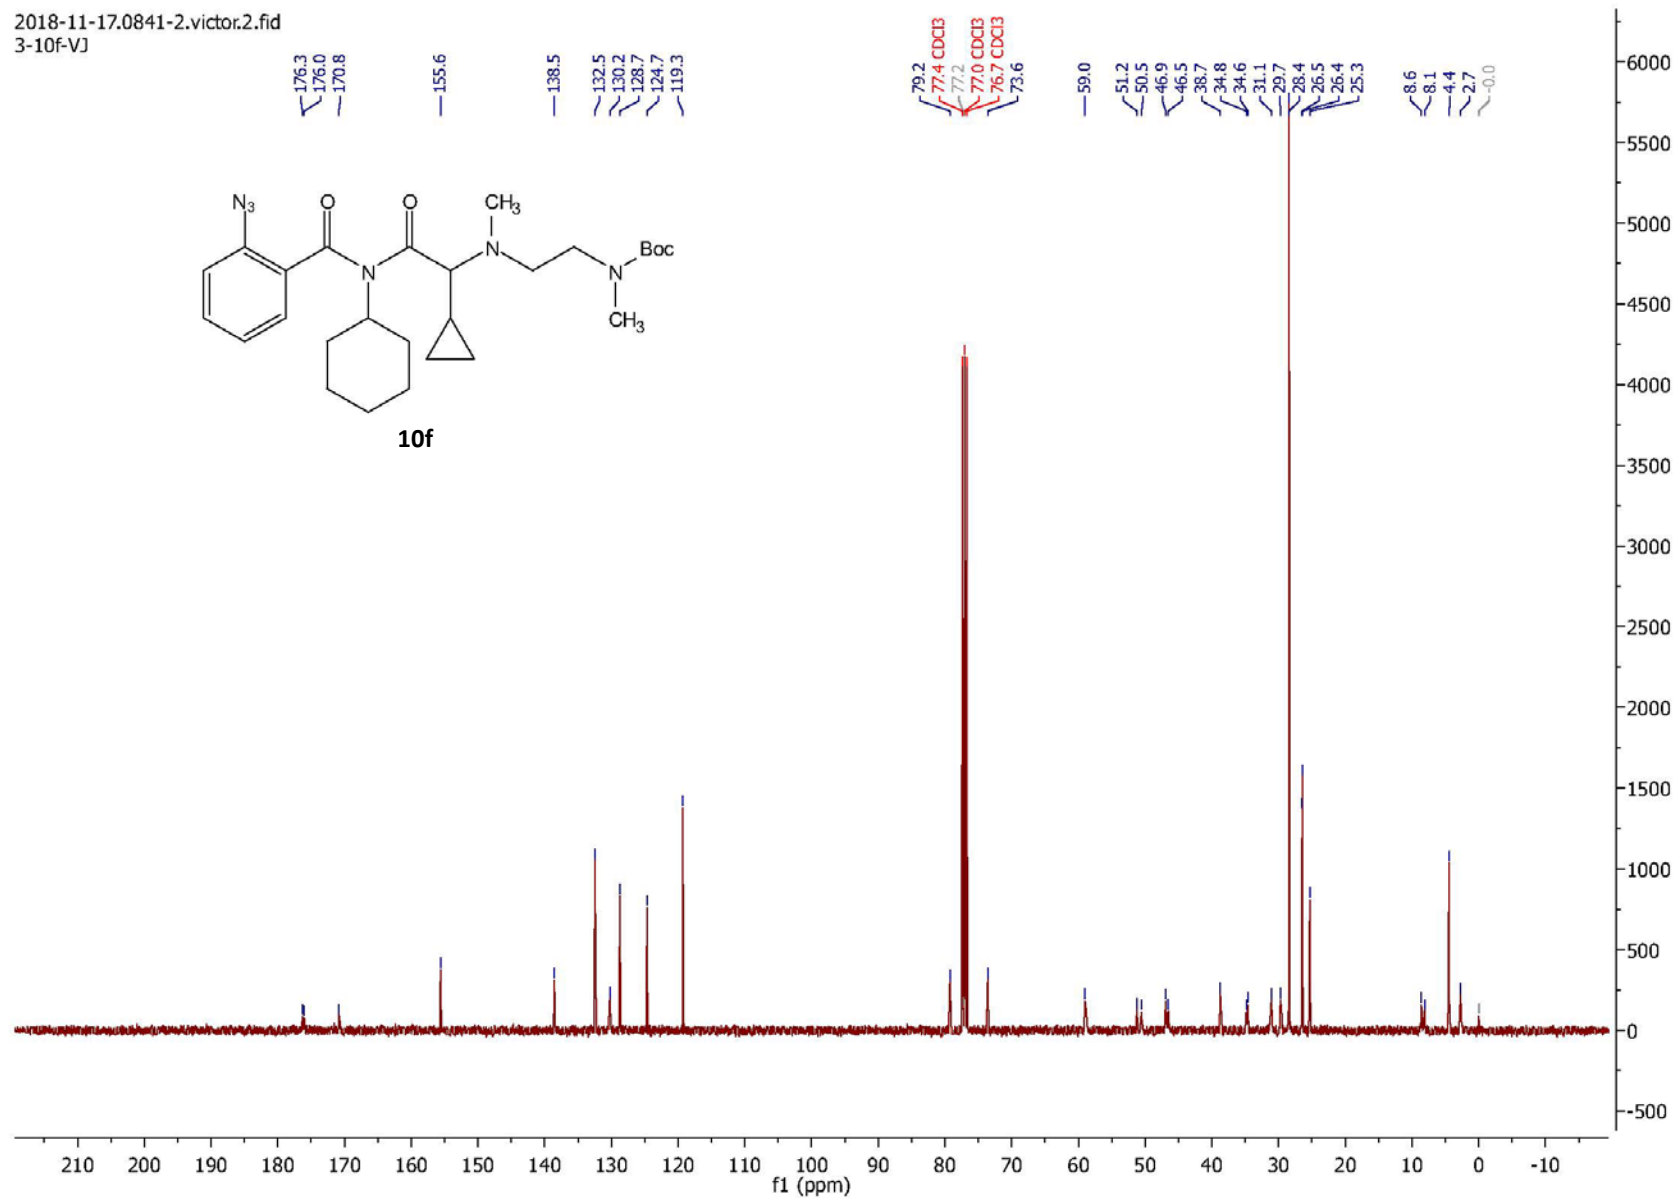

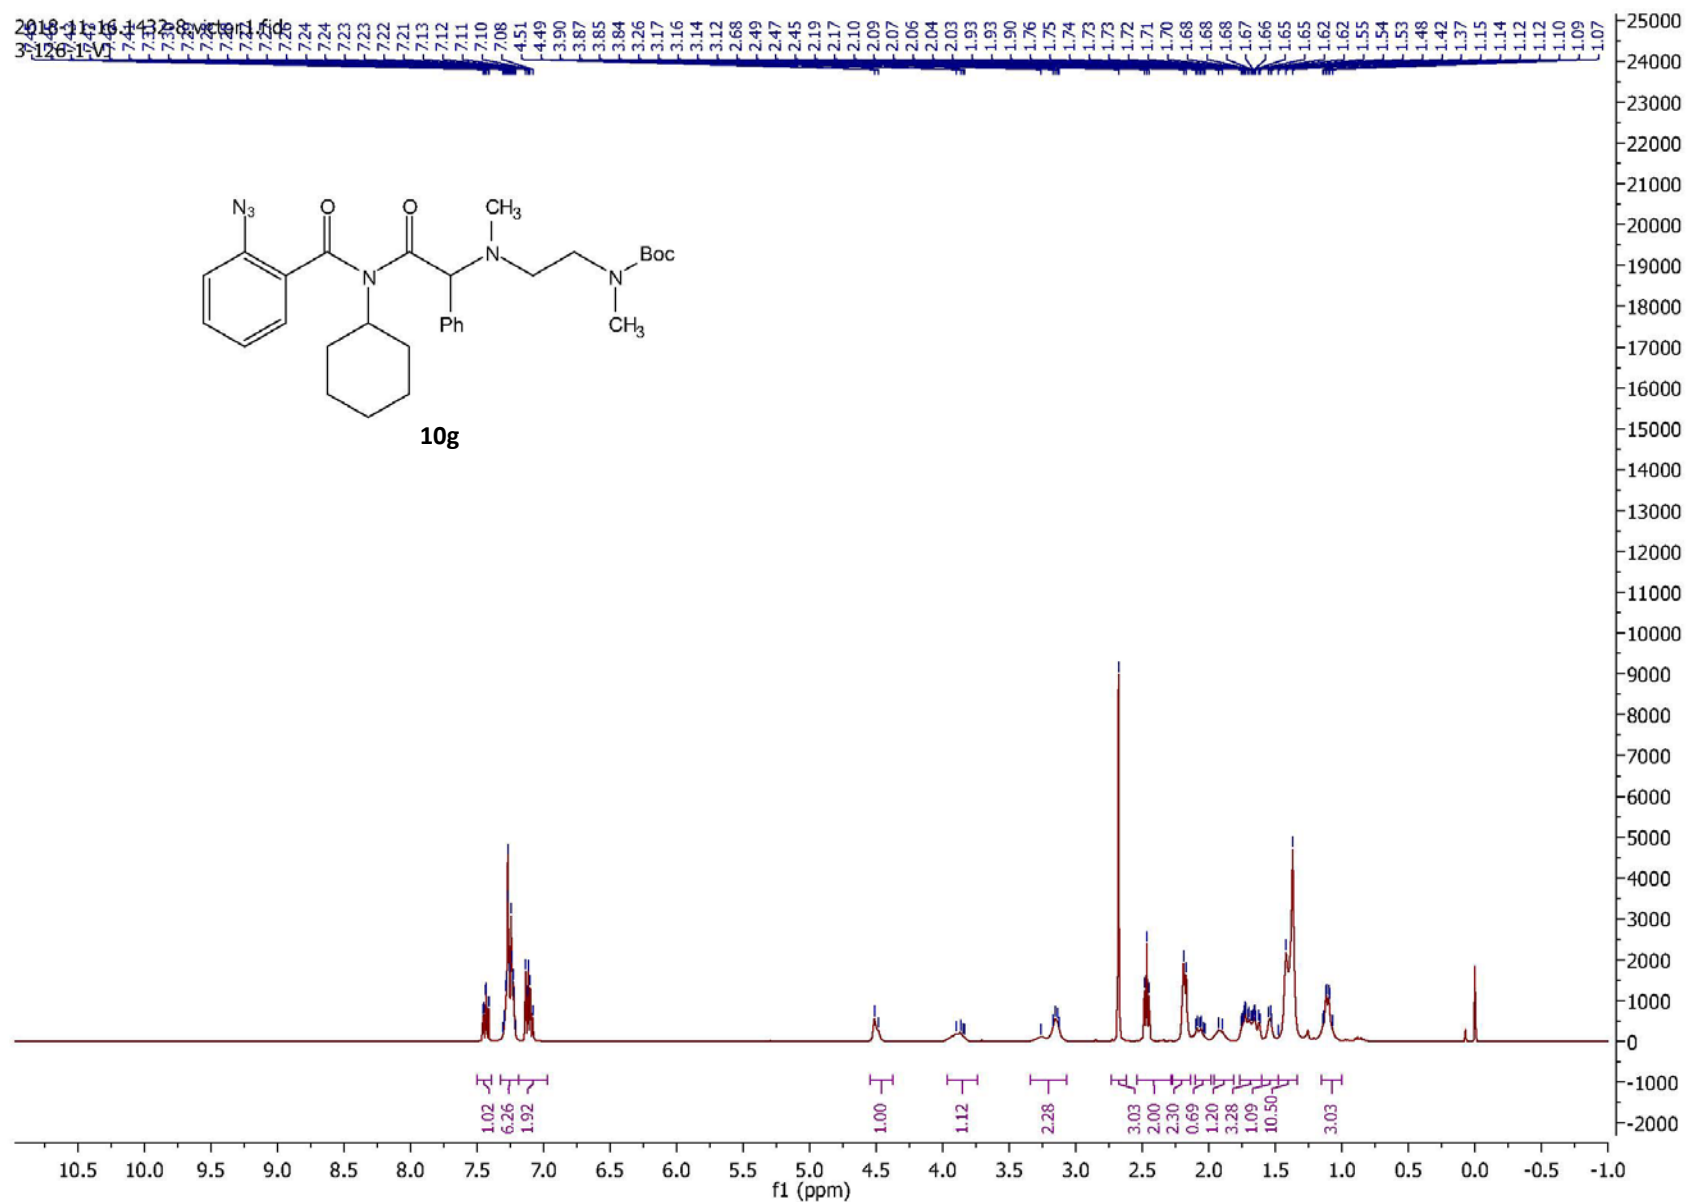



2018-11-16.1432-8.victor.2.fid  
3-126-1-VJ

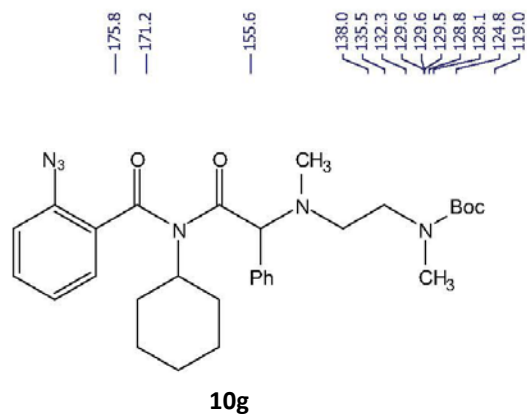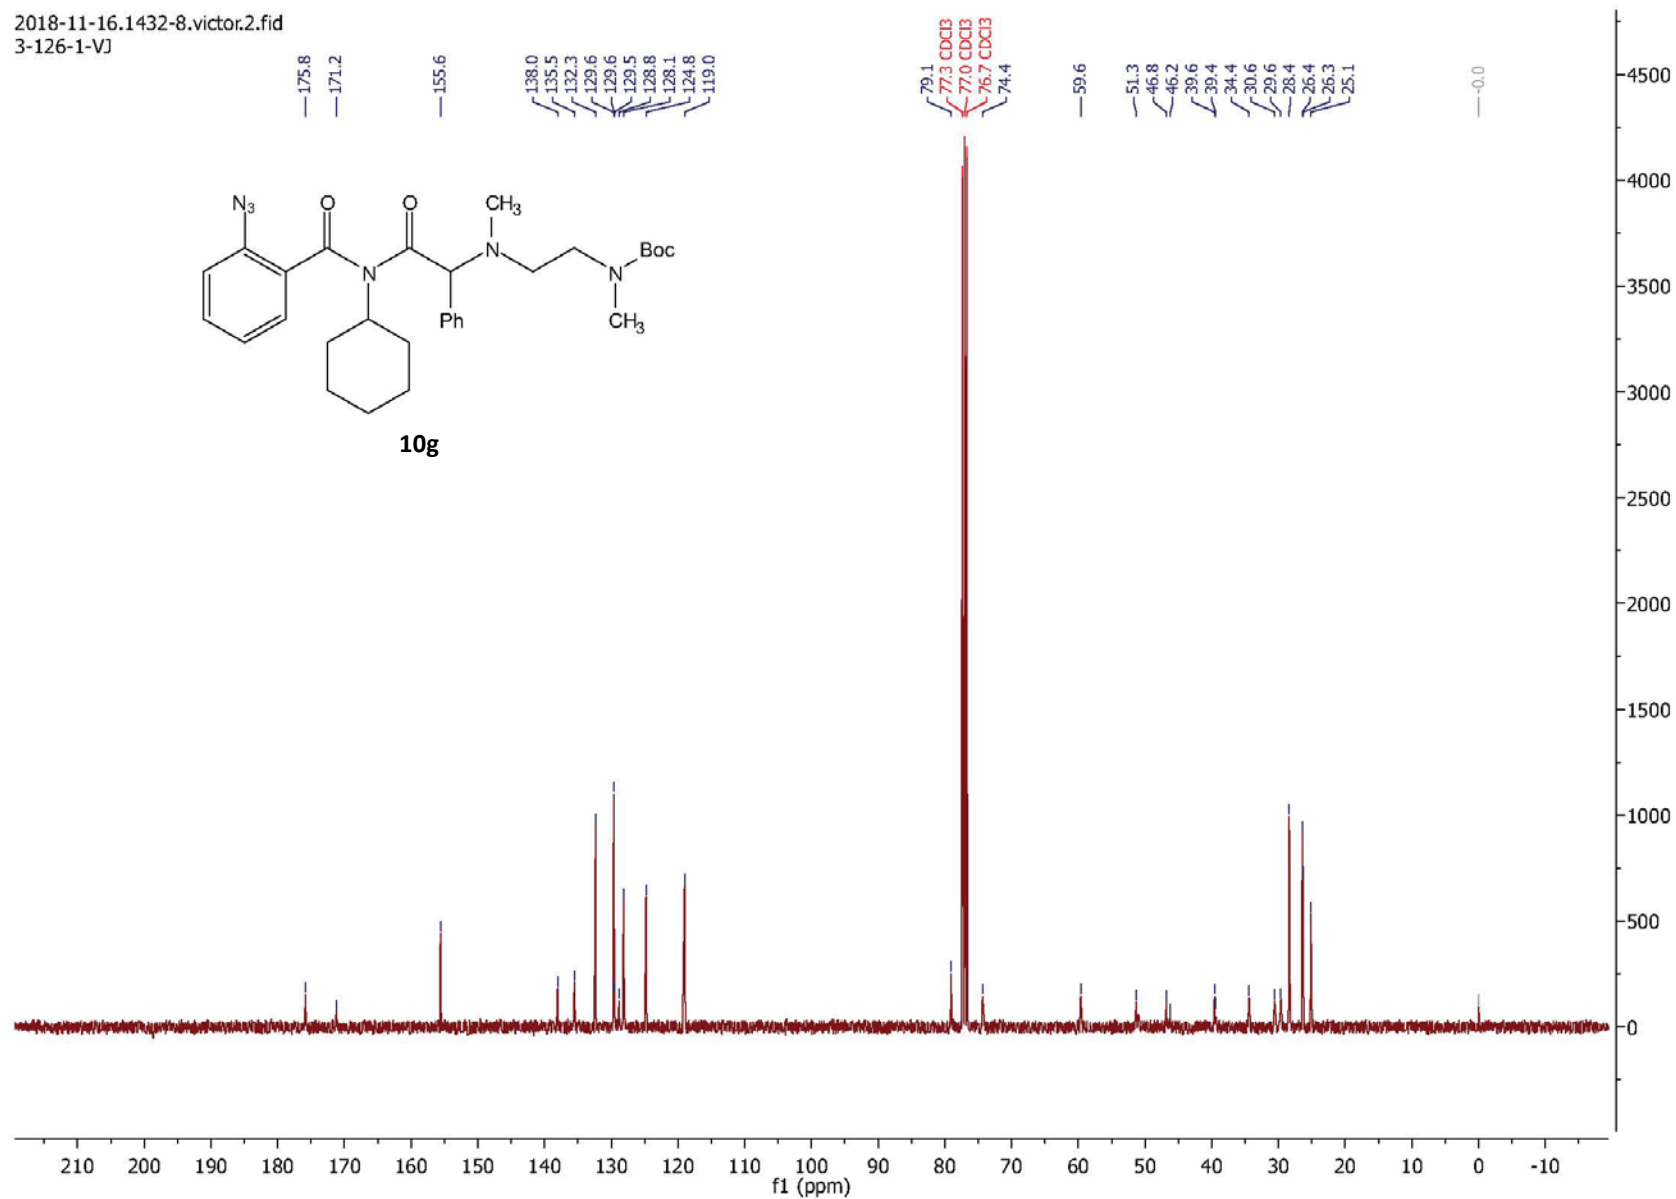

2018-11-16.1432-9.victor.1.fid  
3-10h-VJ

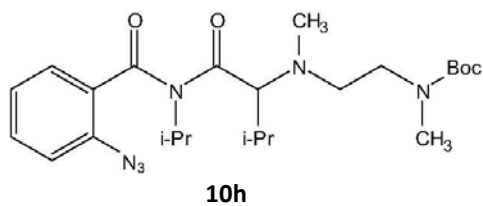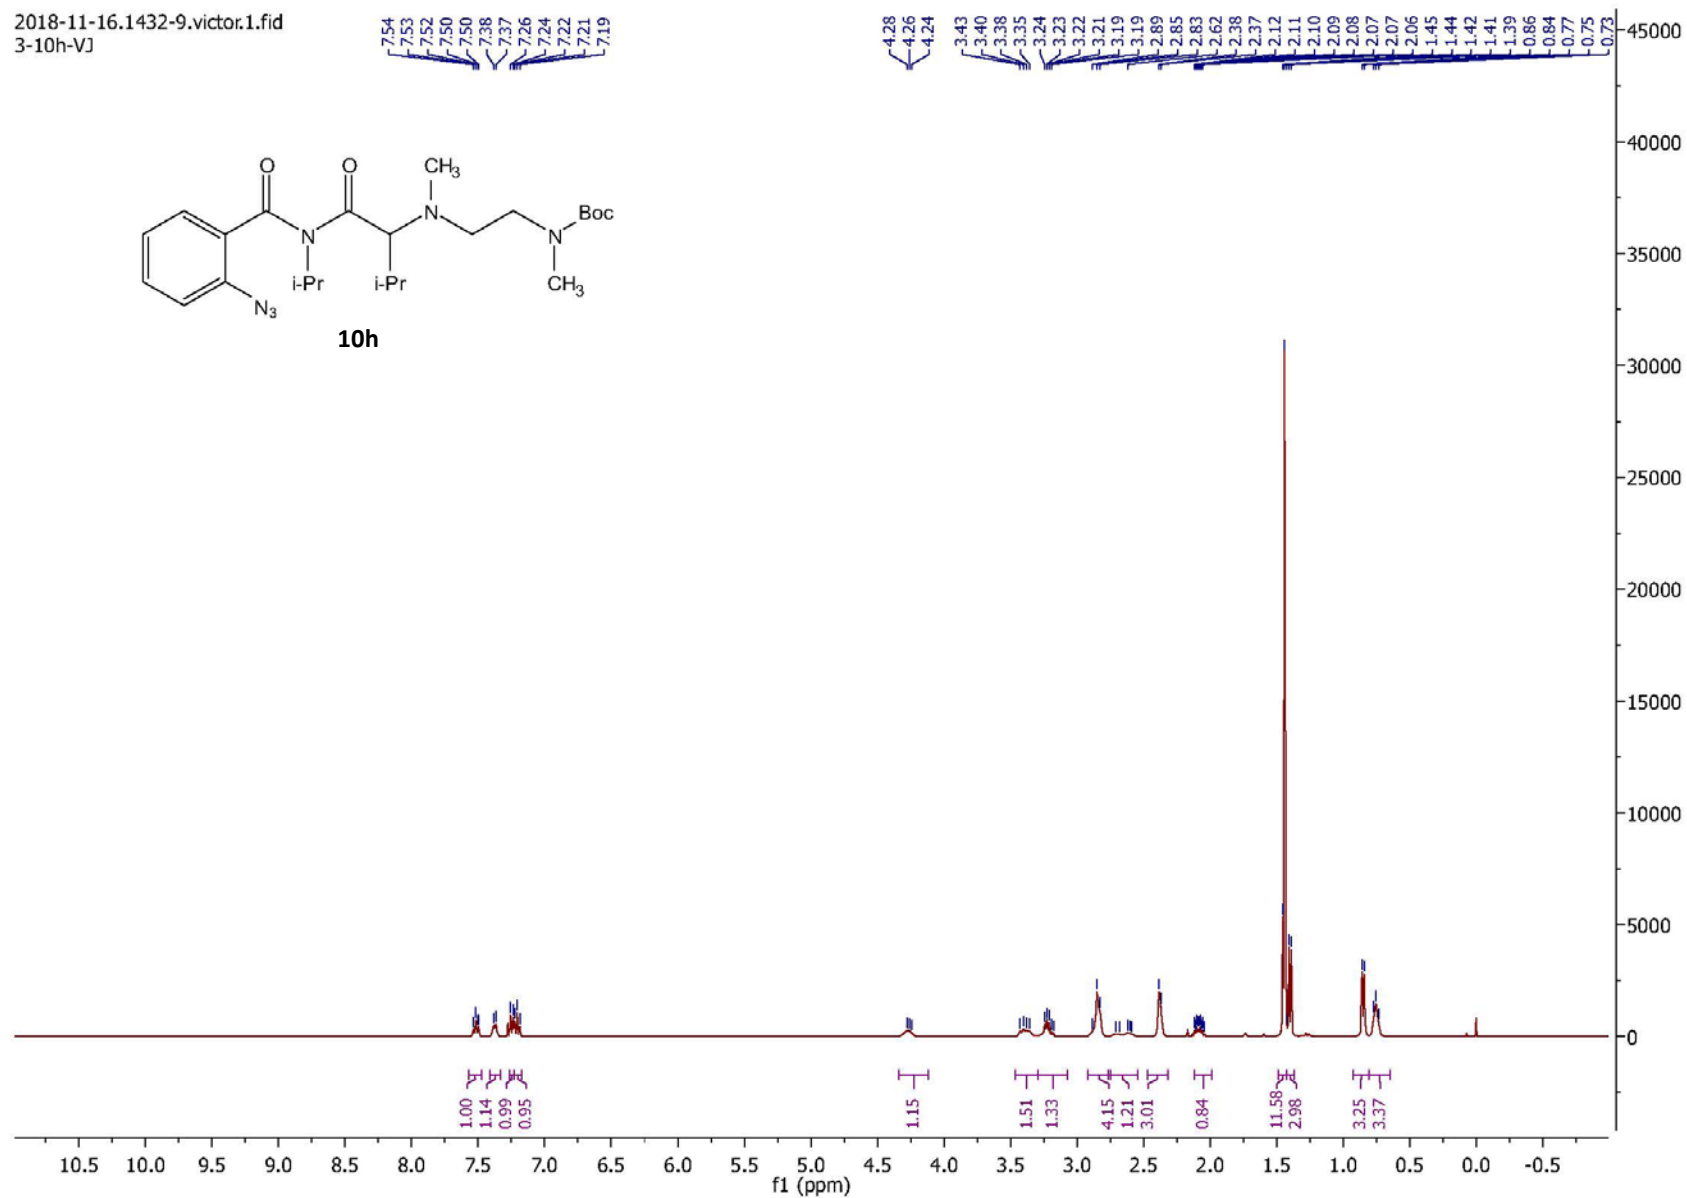

2018-11-16.1432-9.victor.2.fid  
3-10h-VJ

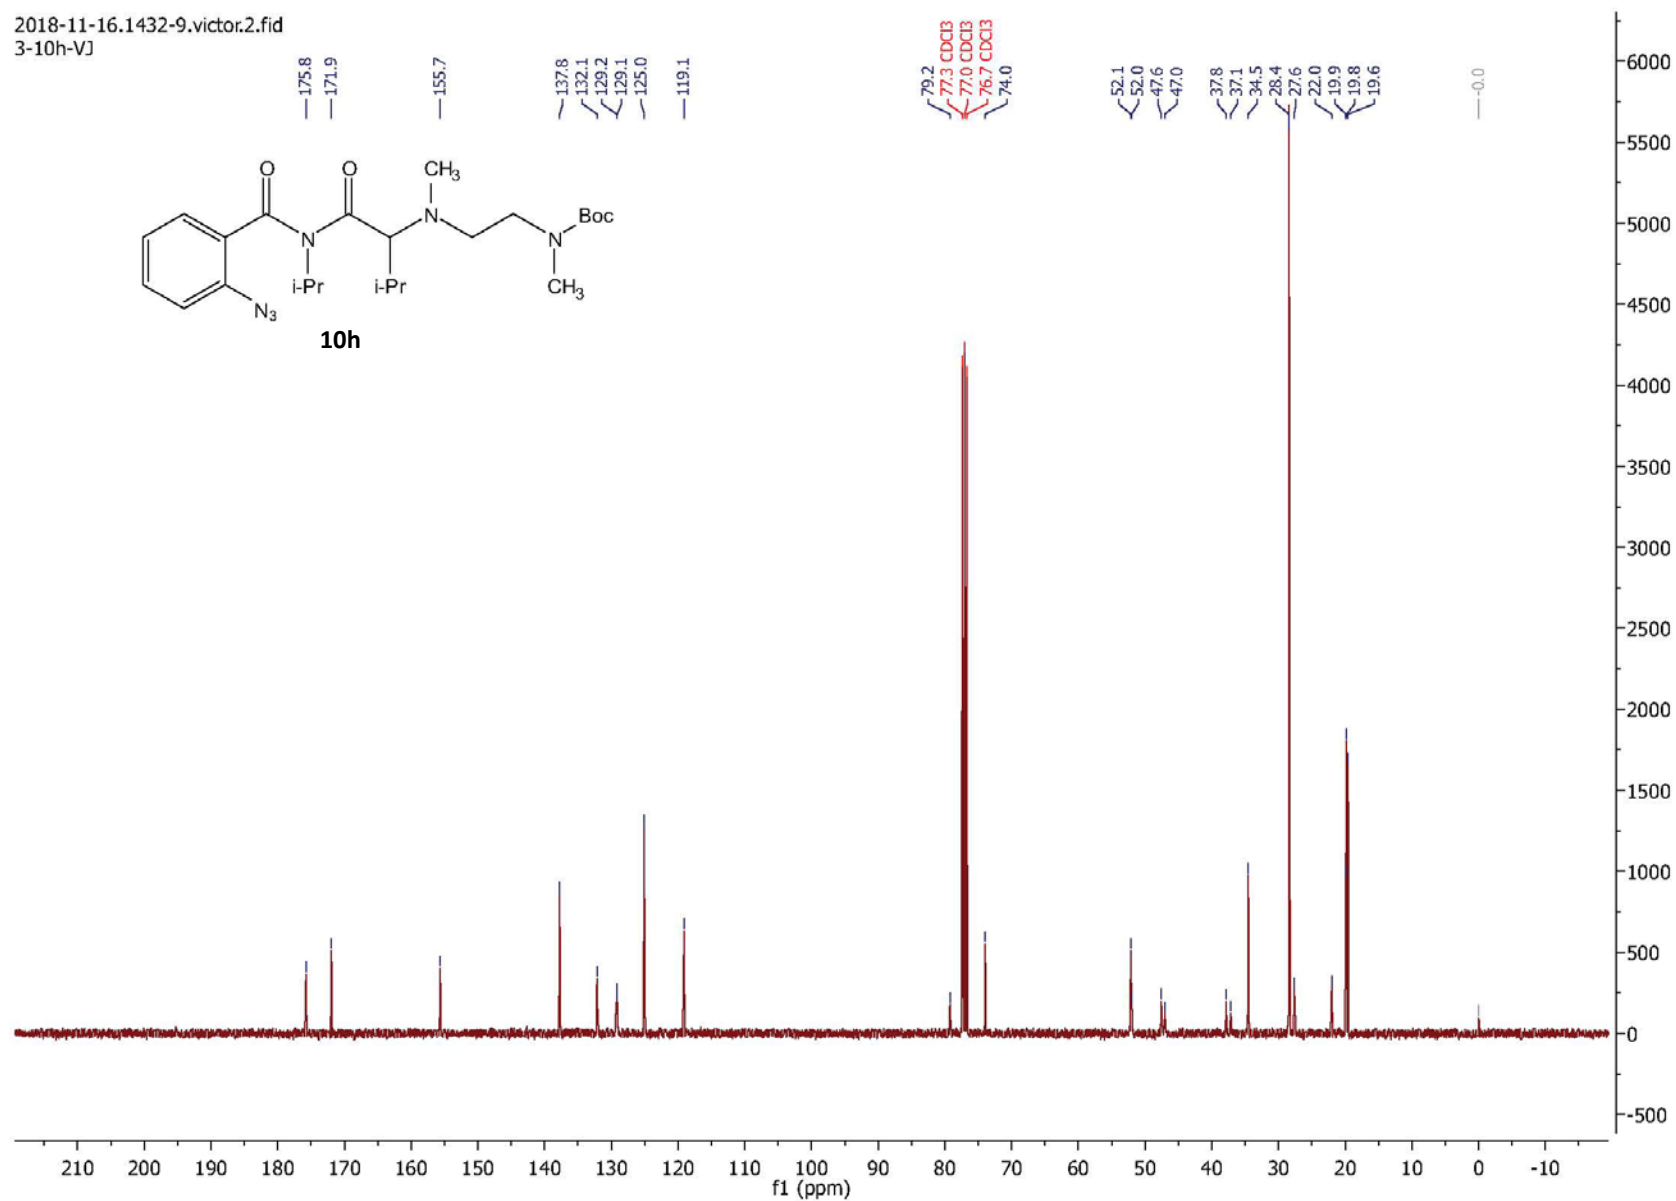

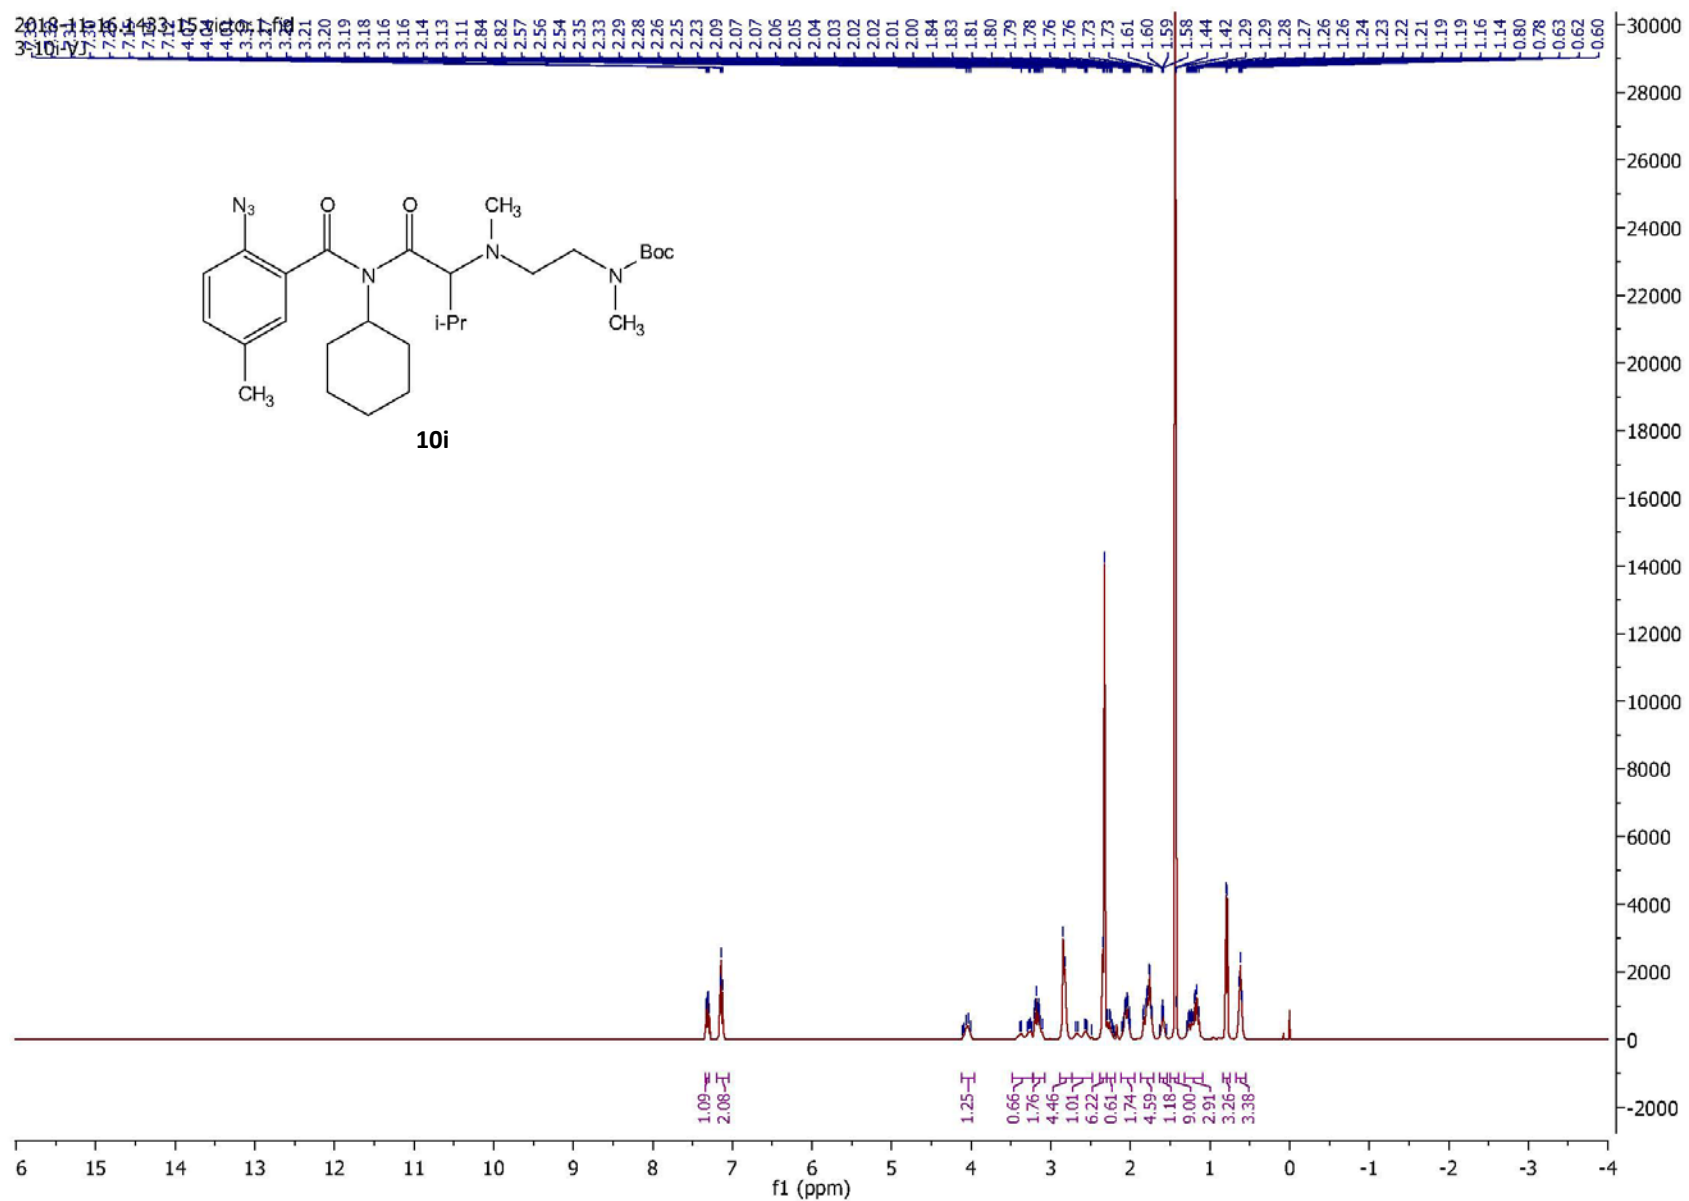

2018-11-16.1433-15.victor.2.fid  
3-10i-VJ

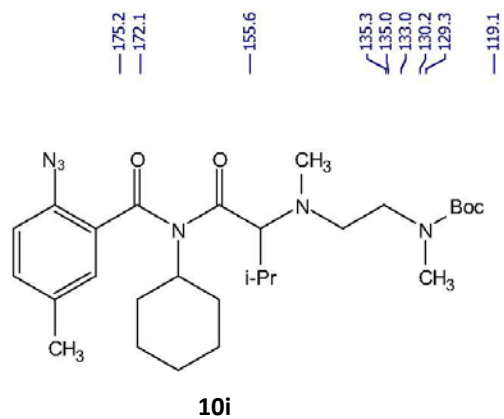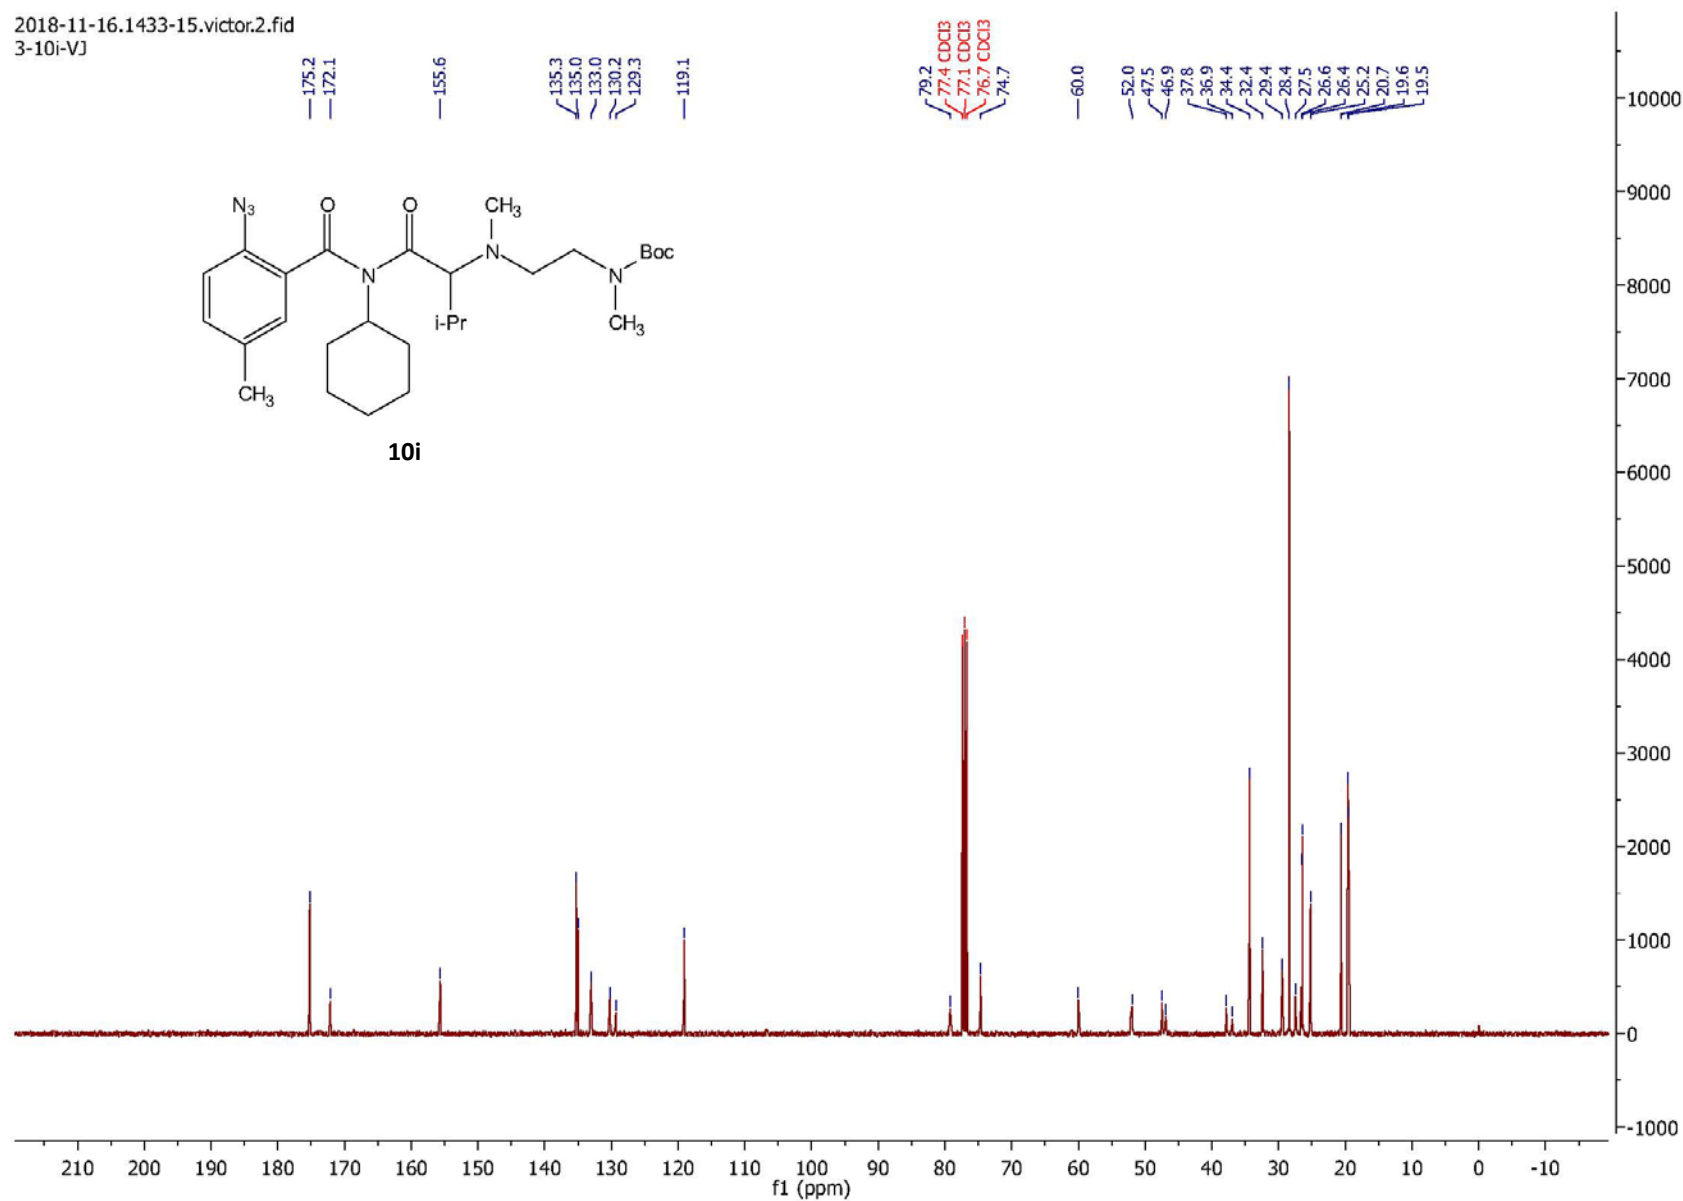

2017-08-07 2021-09-29  
AN-V-62-2-Proton

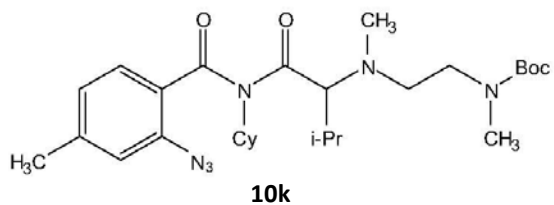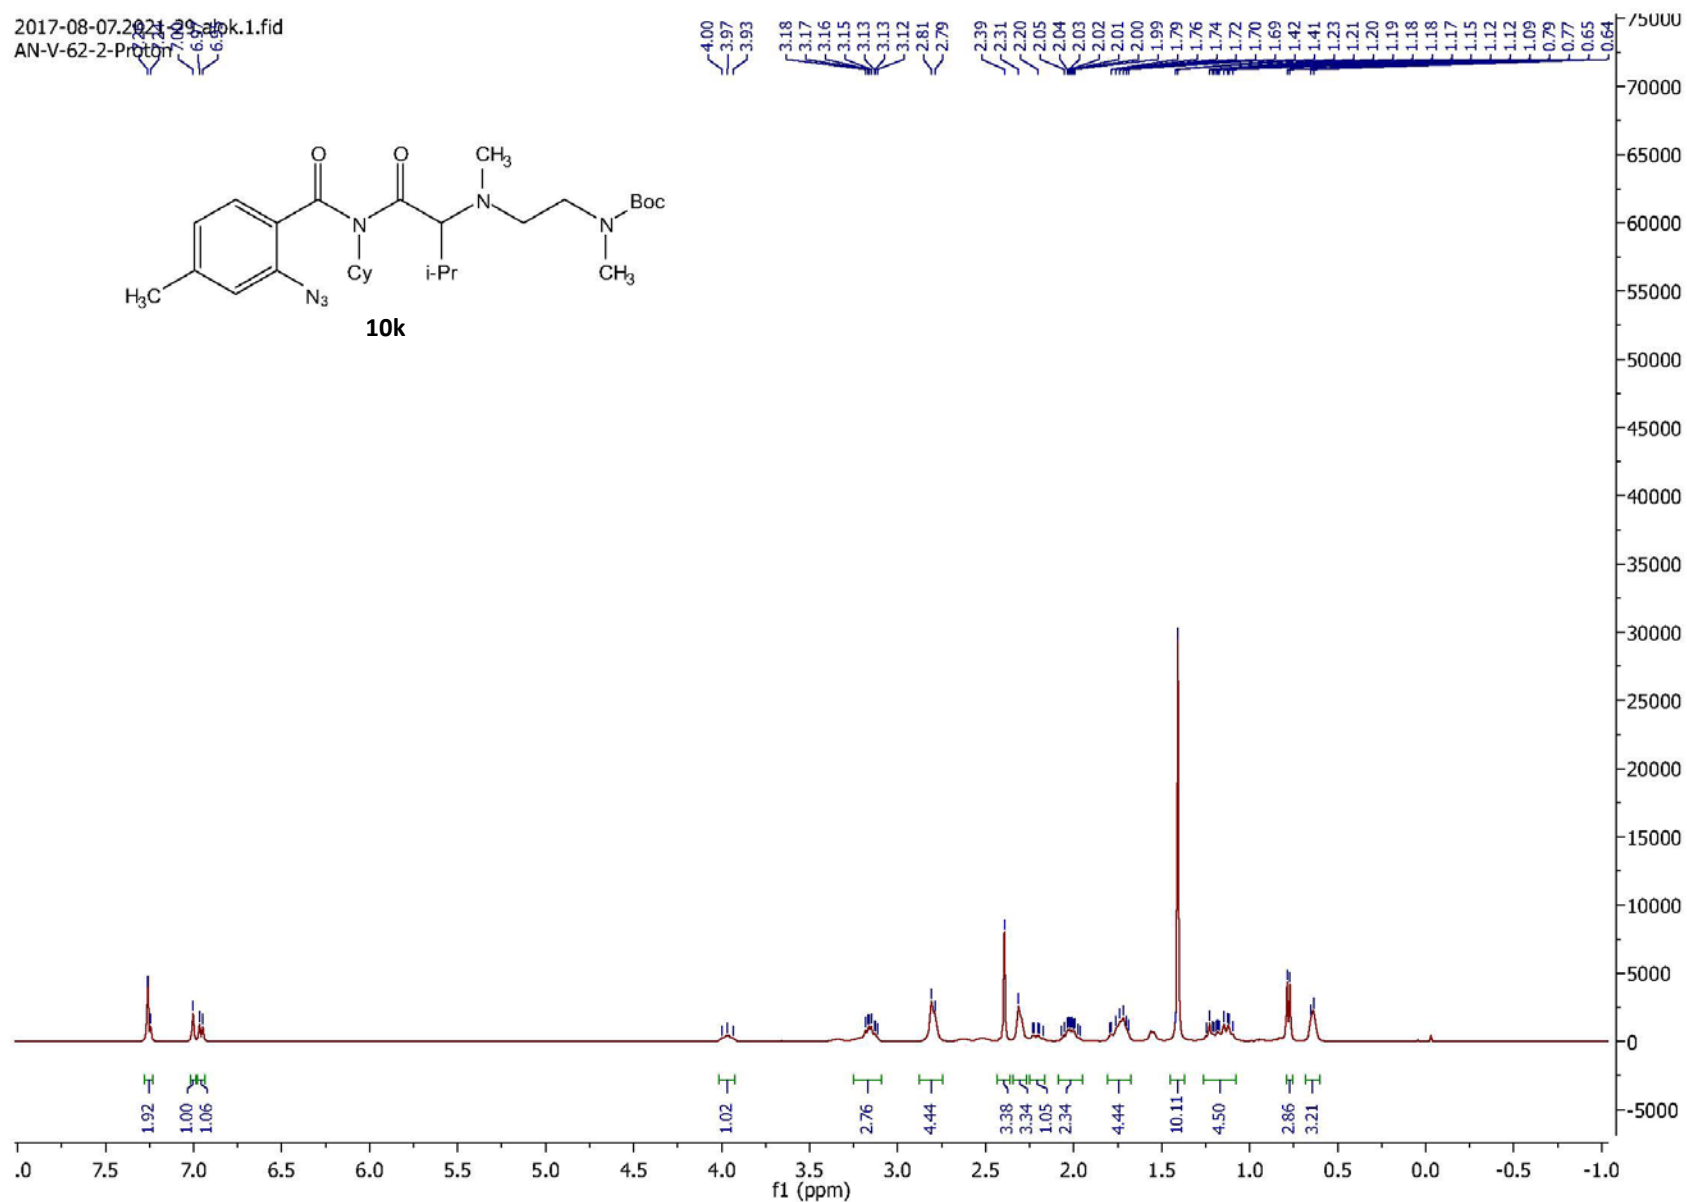

2017-08-07-2021-29.alok.2.fid  
AN-V-62-2-Carbon

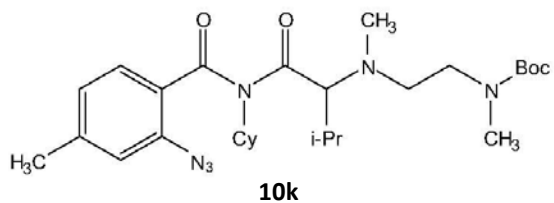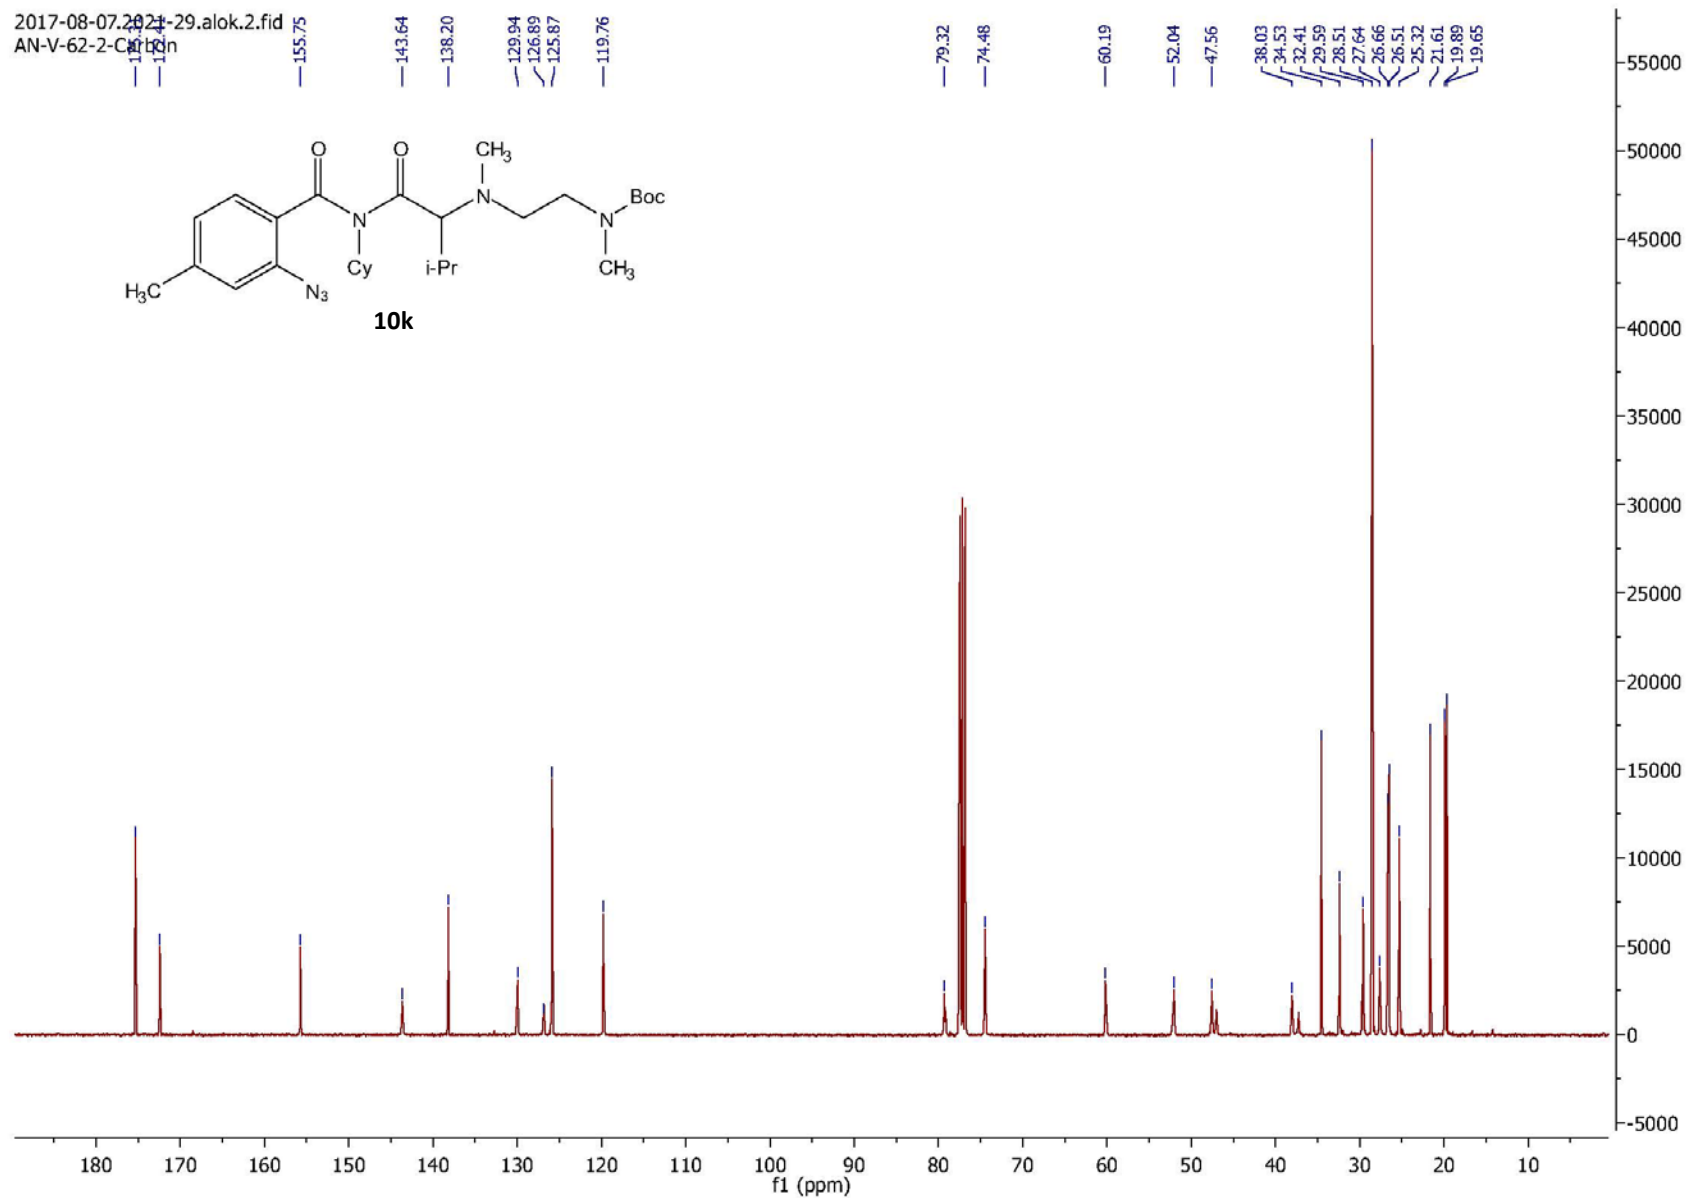

2018-11-05.1613-50.victor.1.fid  
3-149-1-VJ-1H

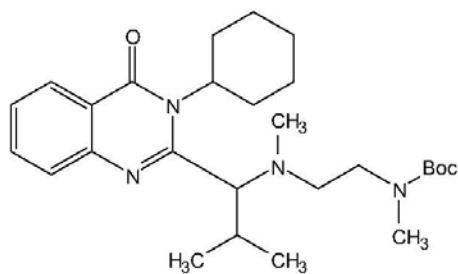

**12a**

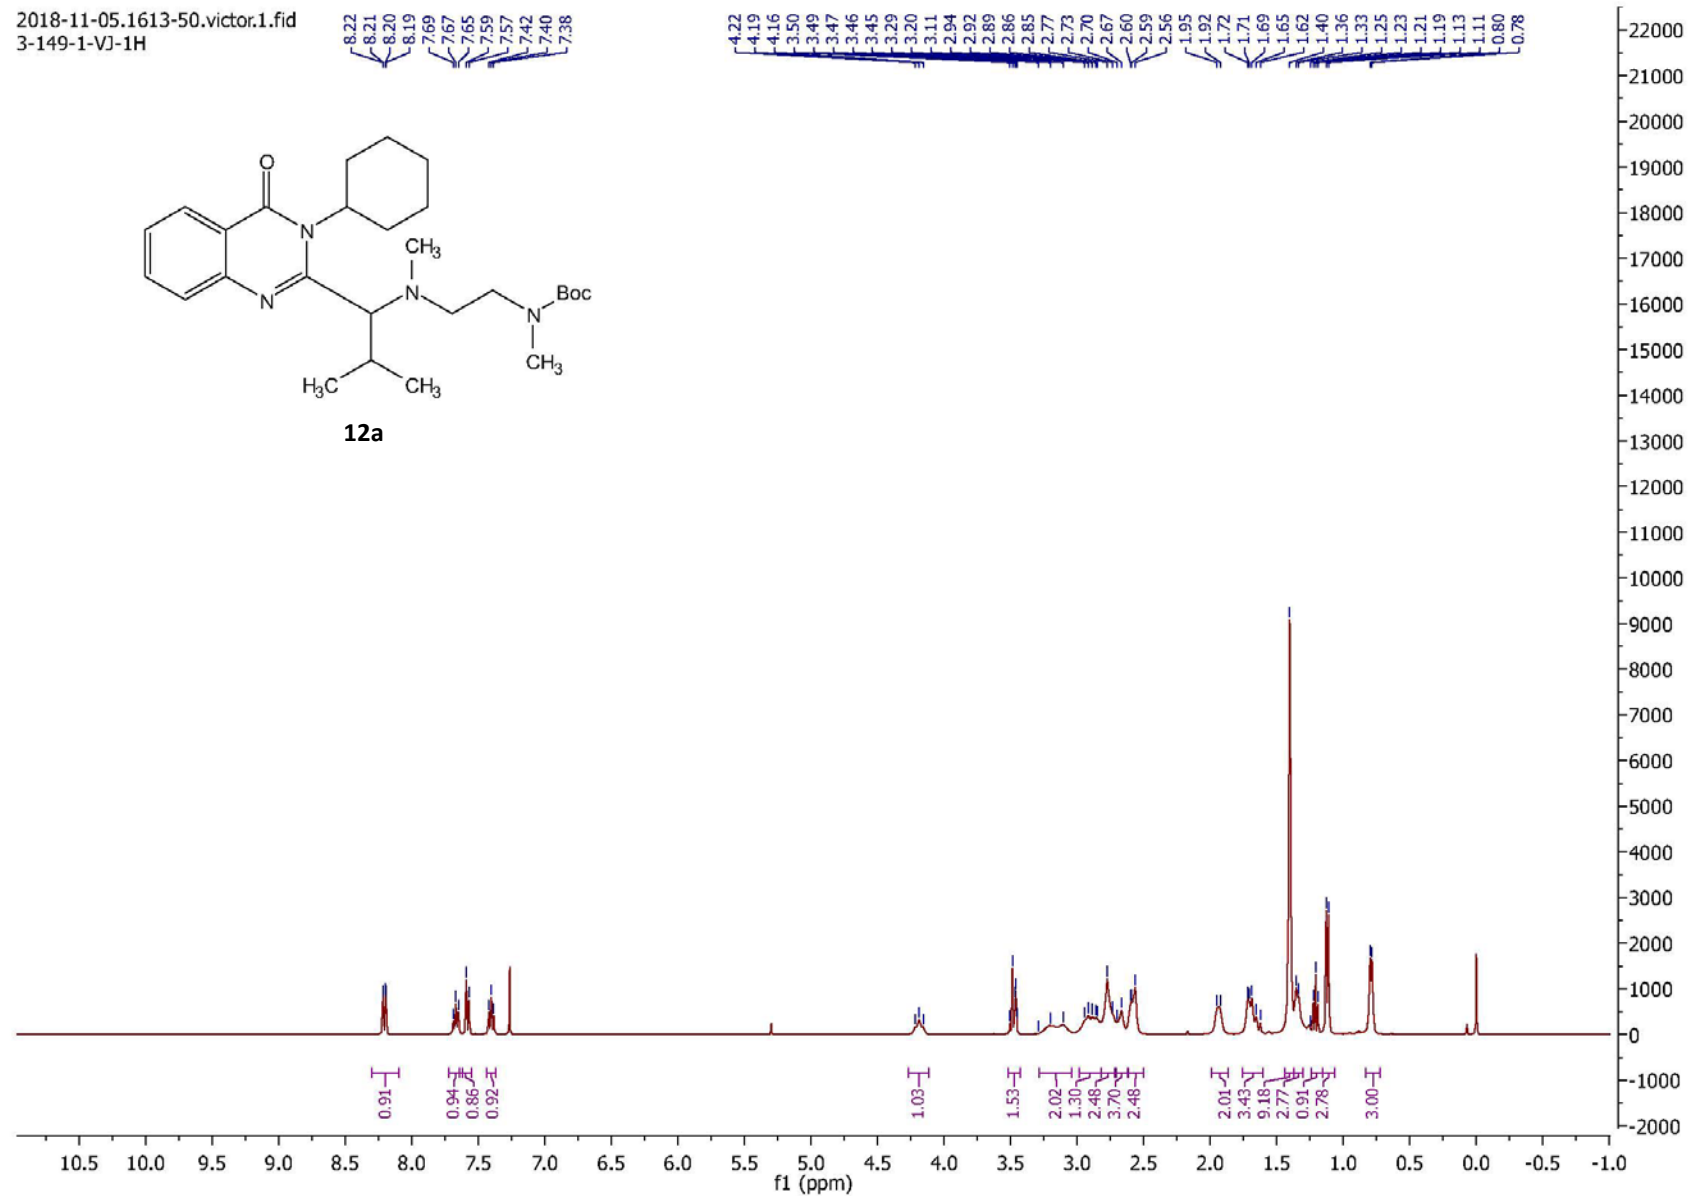



2018-11-05.1613-50.victor.2.fid  
3-149-1-VJ-13C

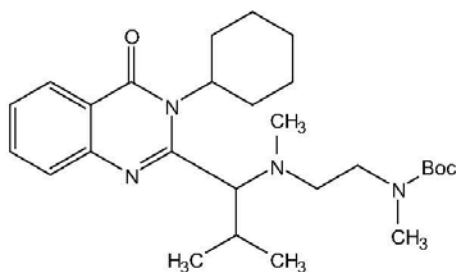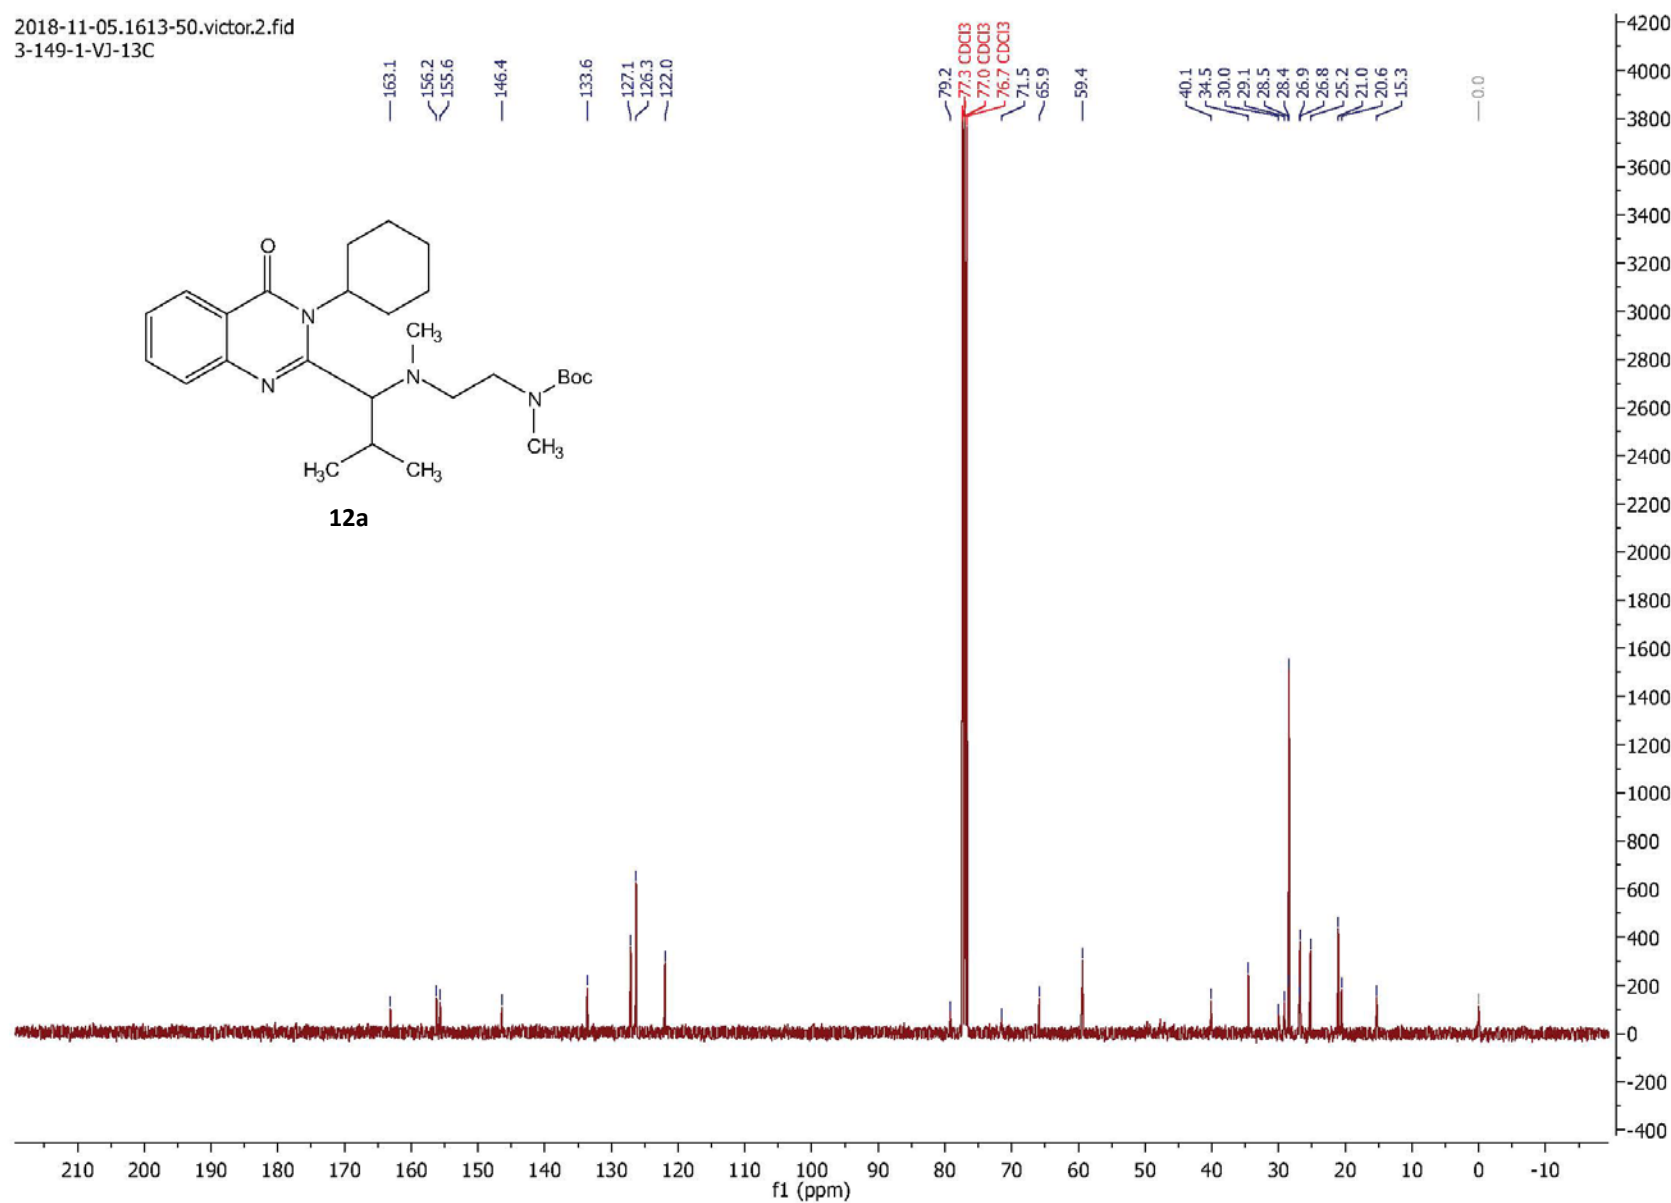



2017-09-06.1951-5.alok.2.fid  
AN-V-70-Carbon

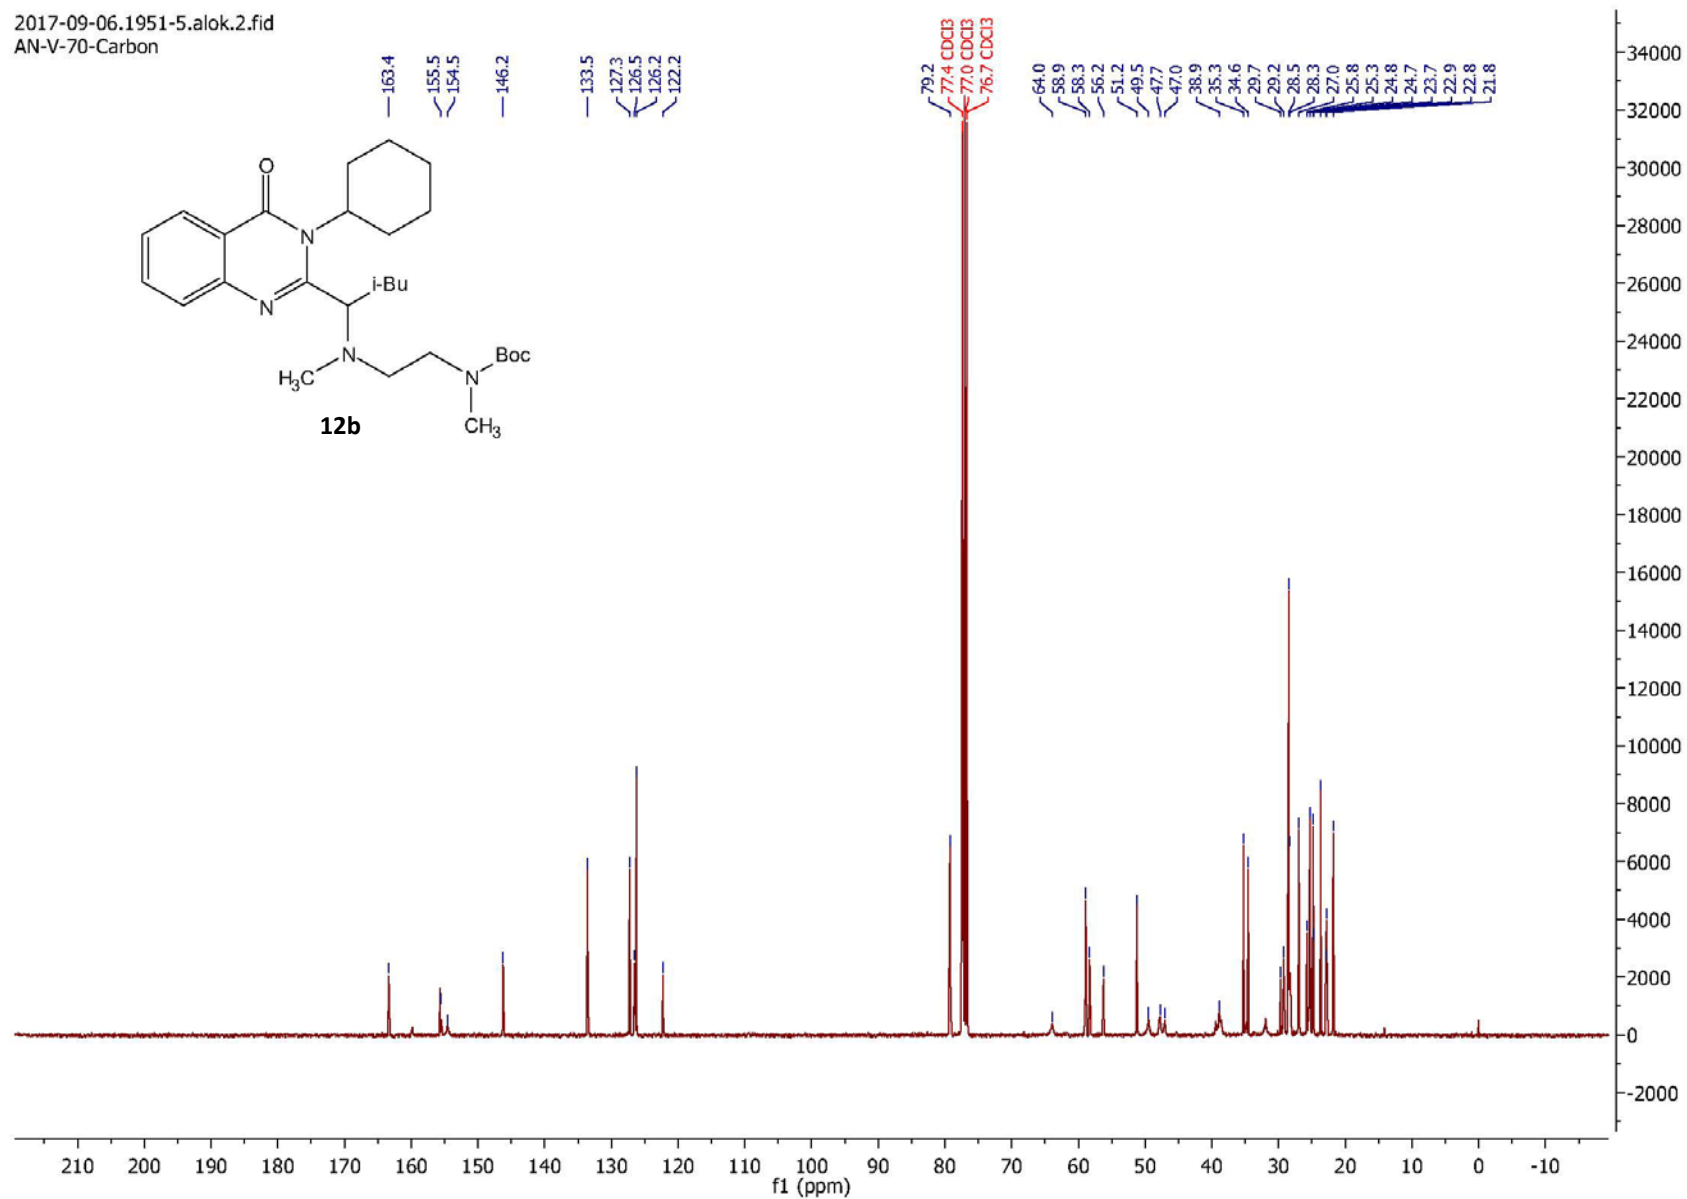

2018-11-07.1522-21.victor.1.fid  
3-151-1-VJ

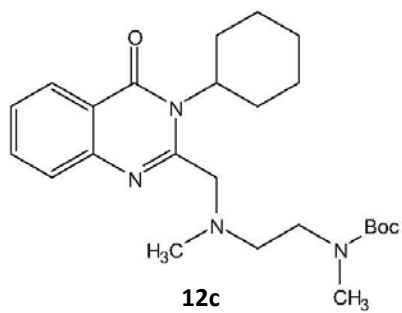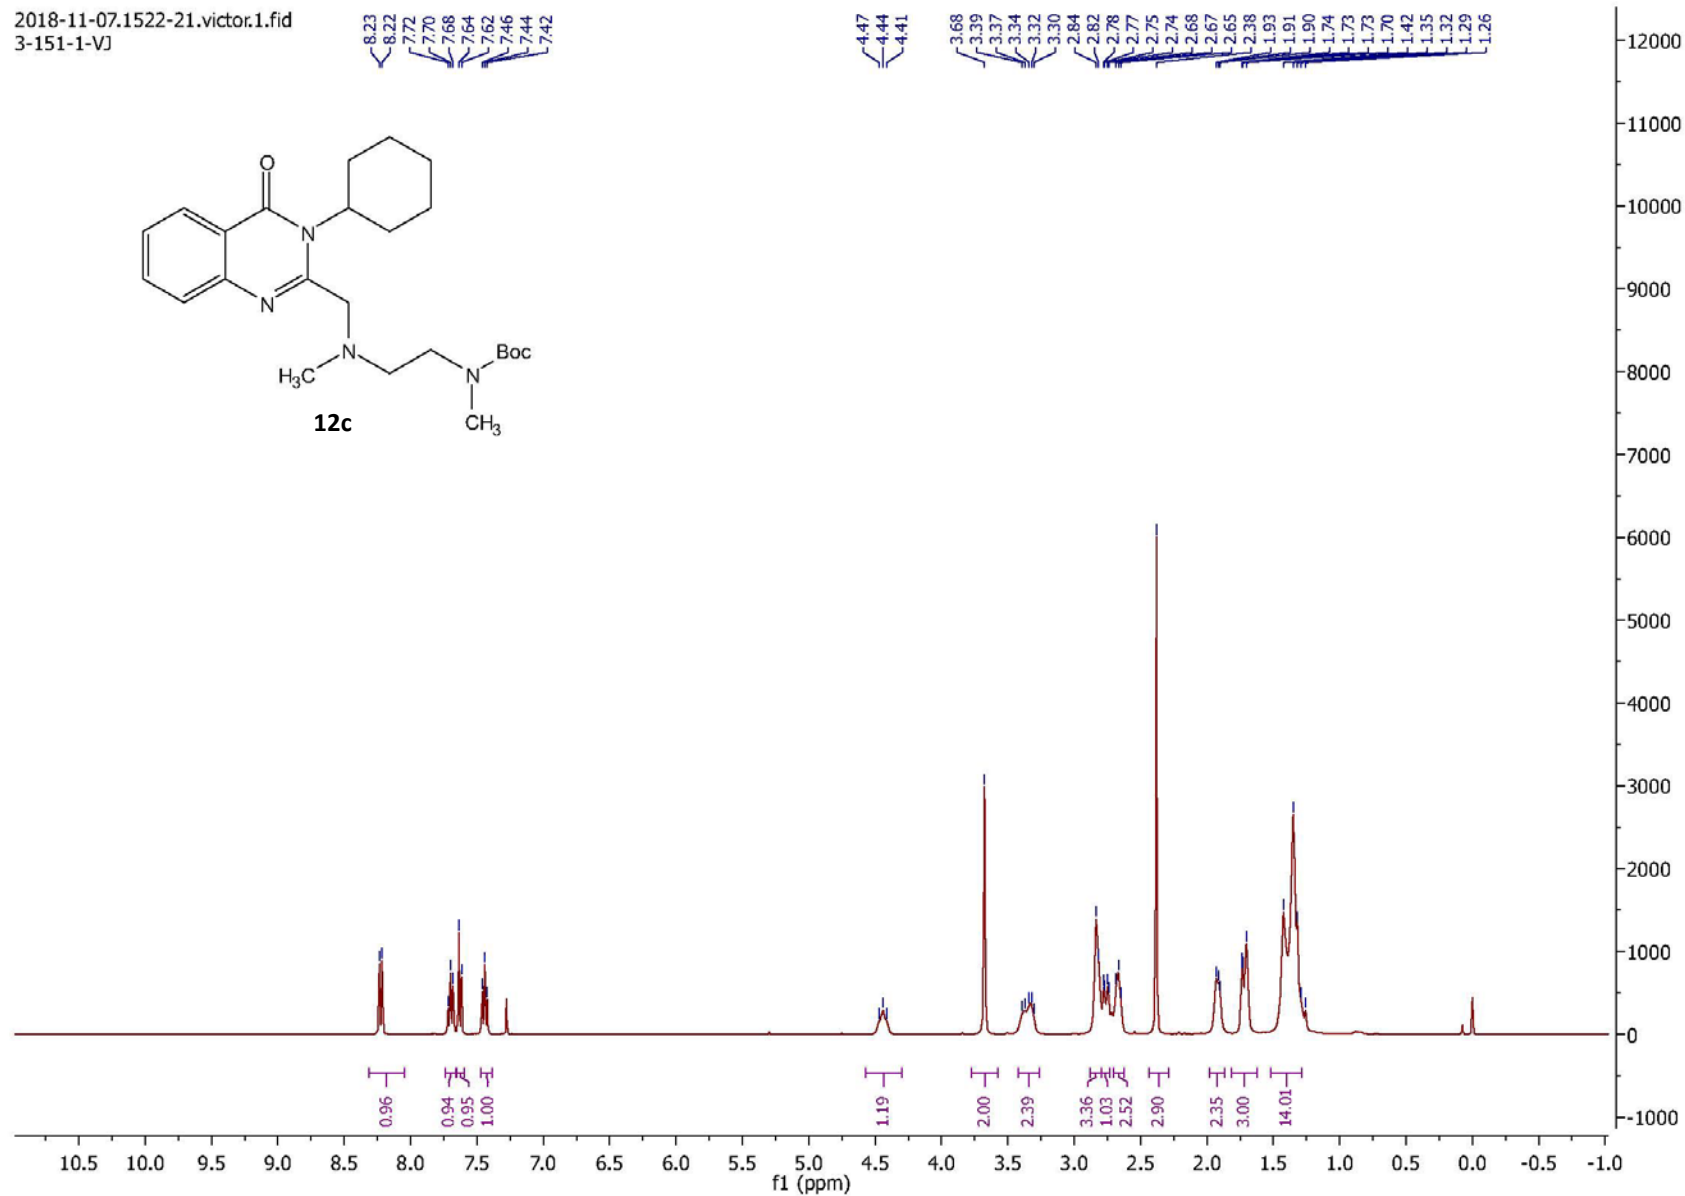

2018-11-07.1522-21.victor.2.fid  
3-151-1-VJ

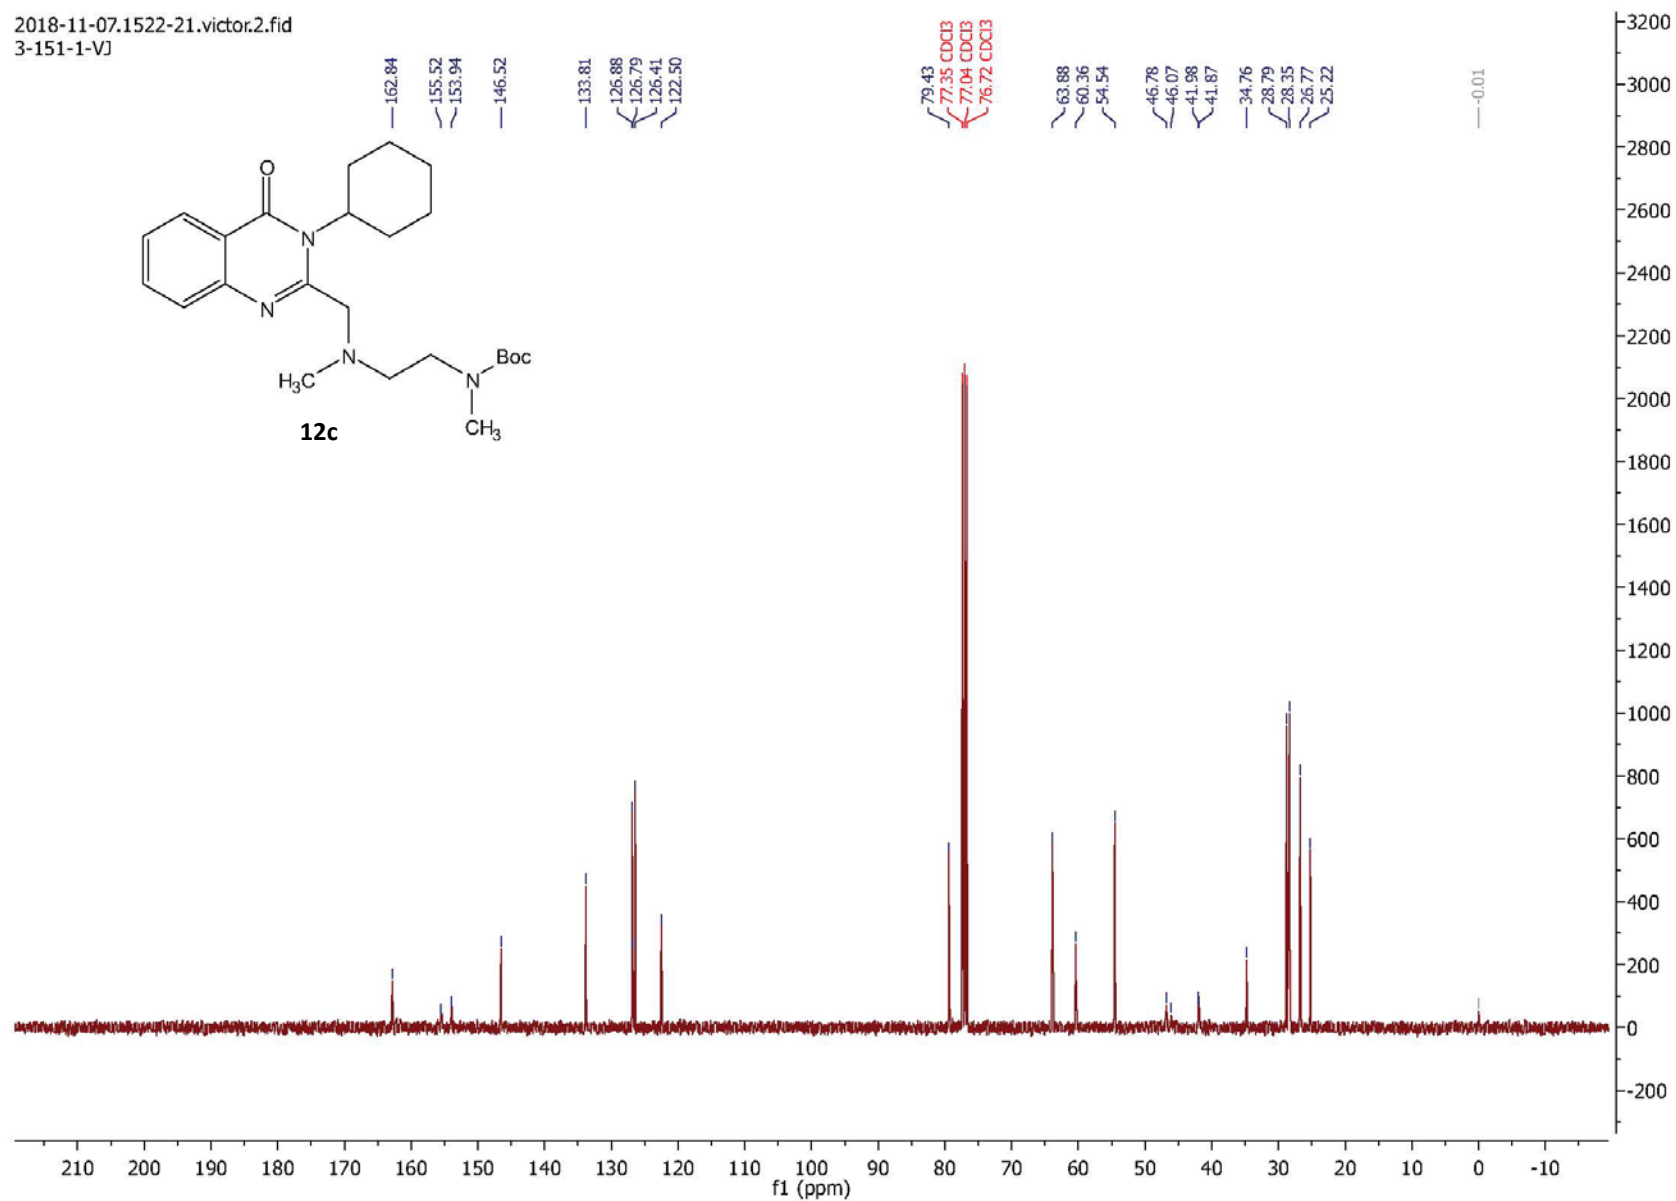

2018-11-06.1042-29.victor.1.fid  
3-150-1-VJ-1H

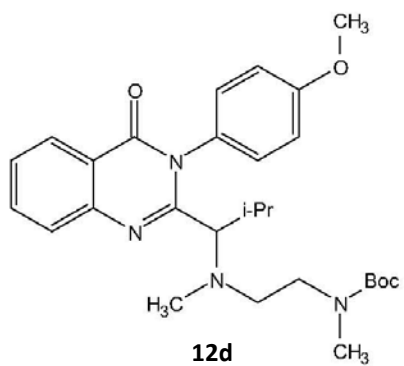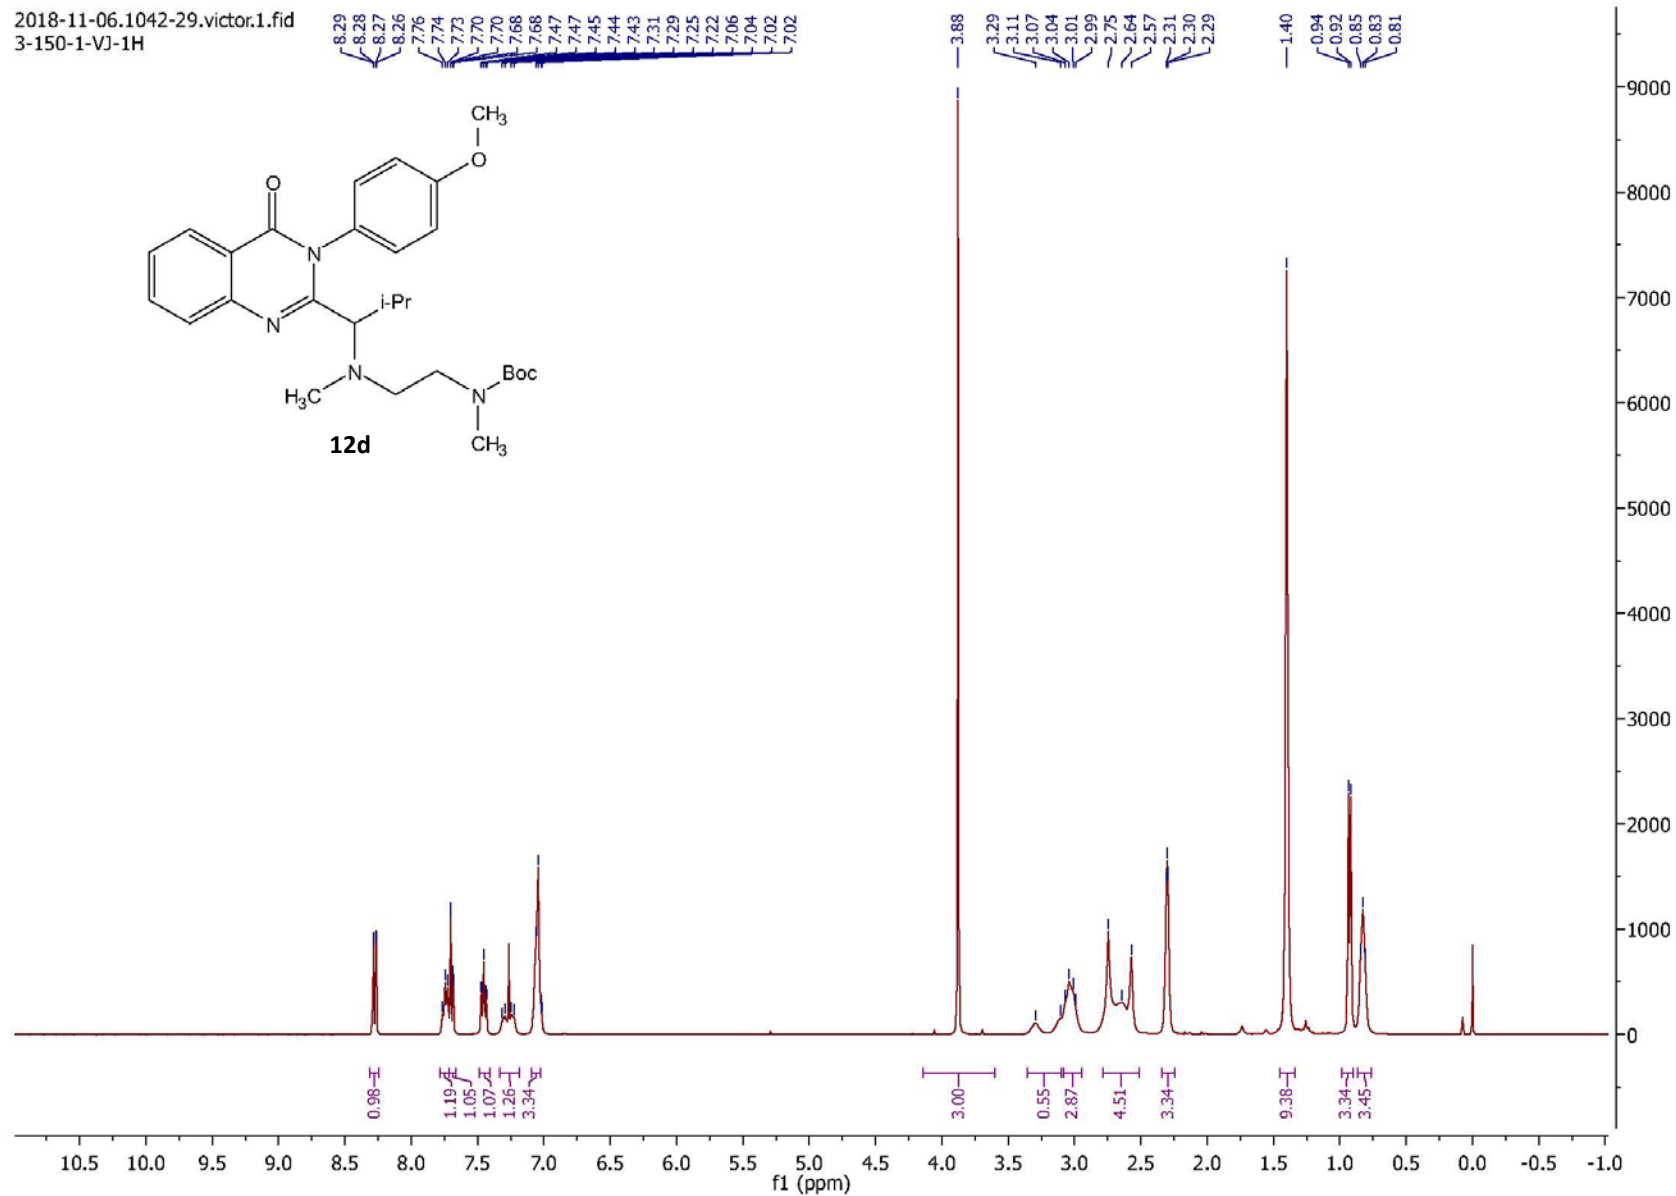

2018-11-06.1042-29.victor.2.fid  
3-150-1-VJ-13C

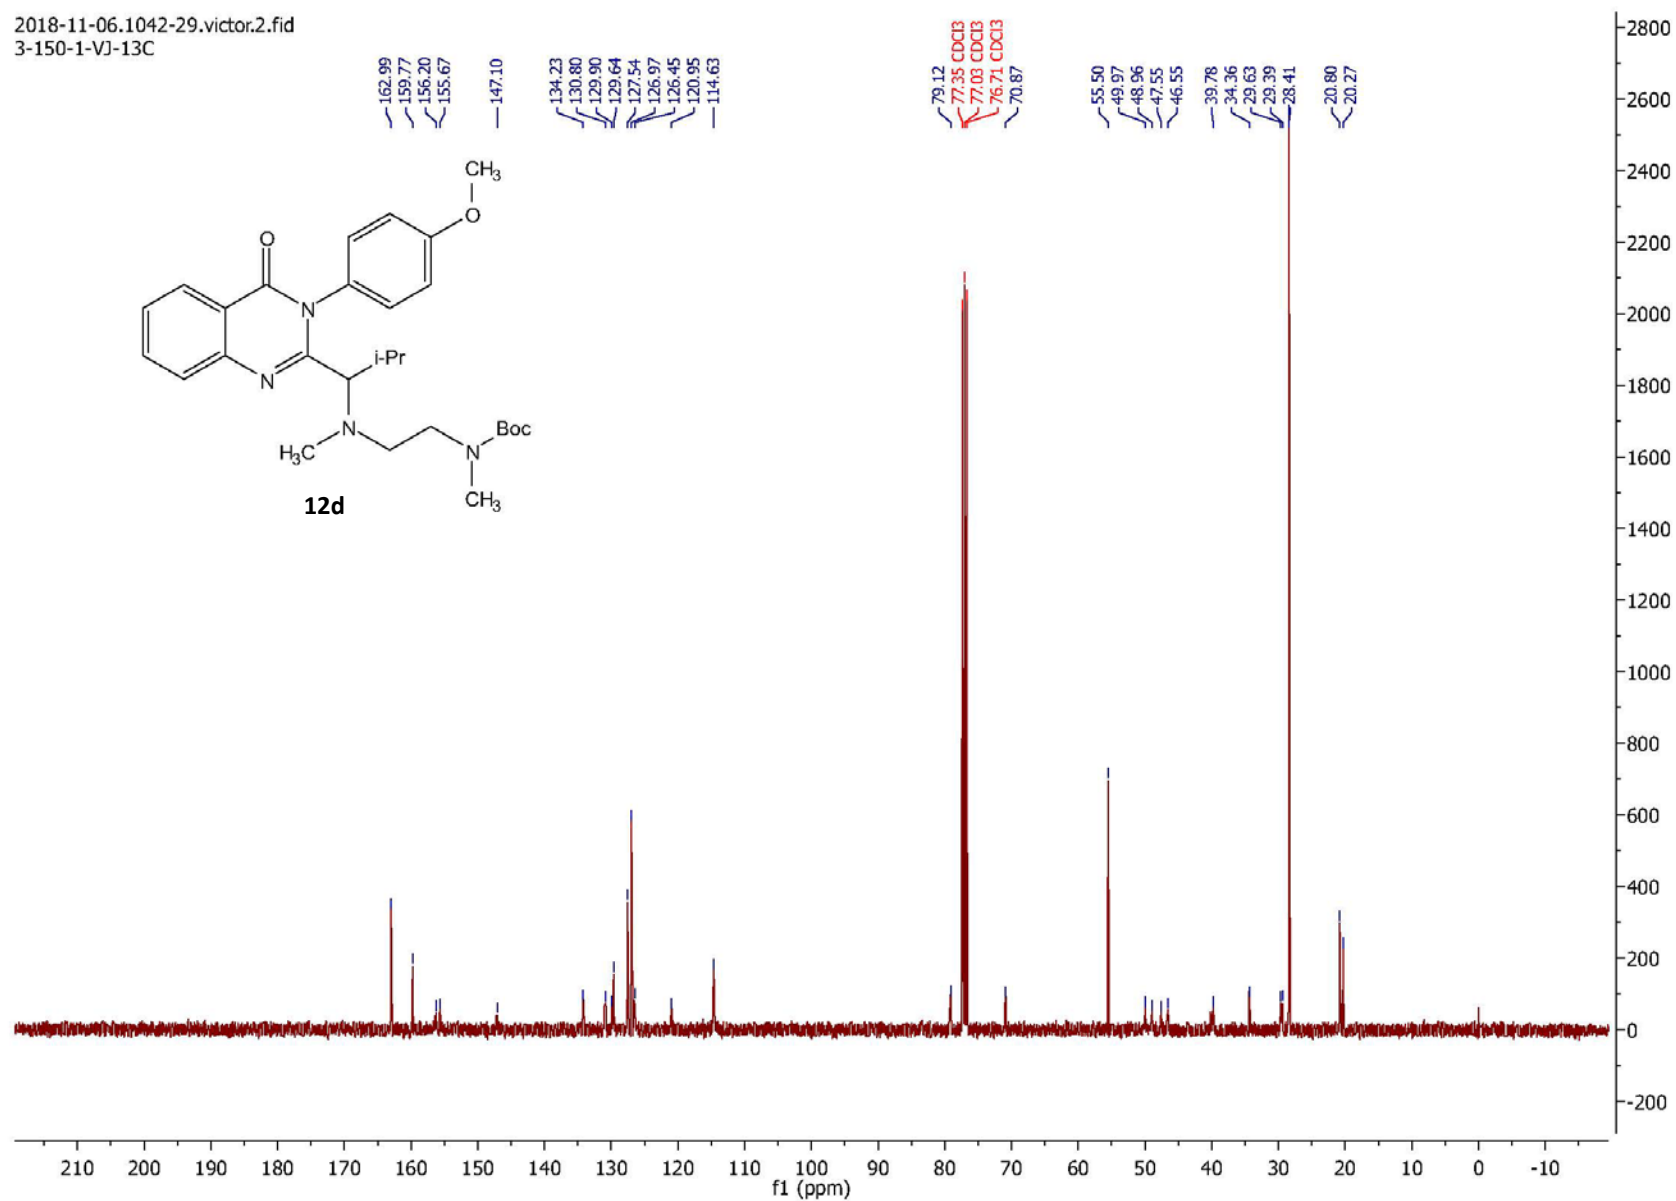

2018-11-02.1400-27.victor.1.fid  
3-146-1-VJ-1H

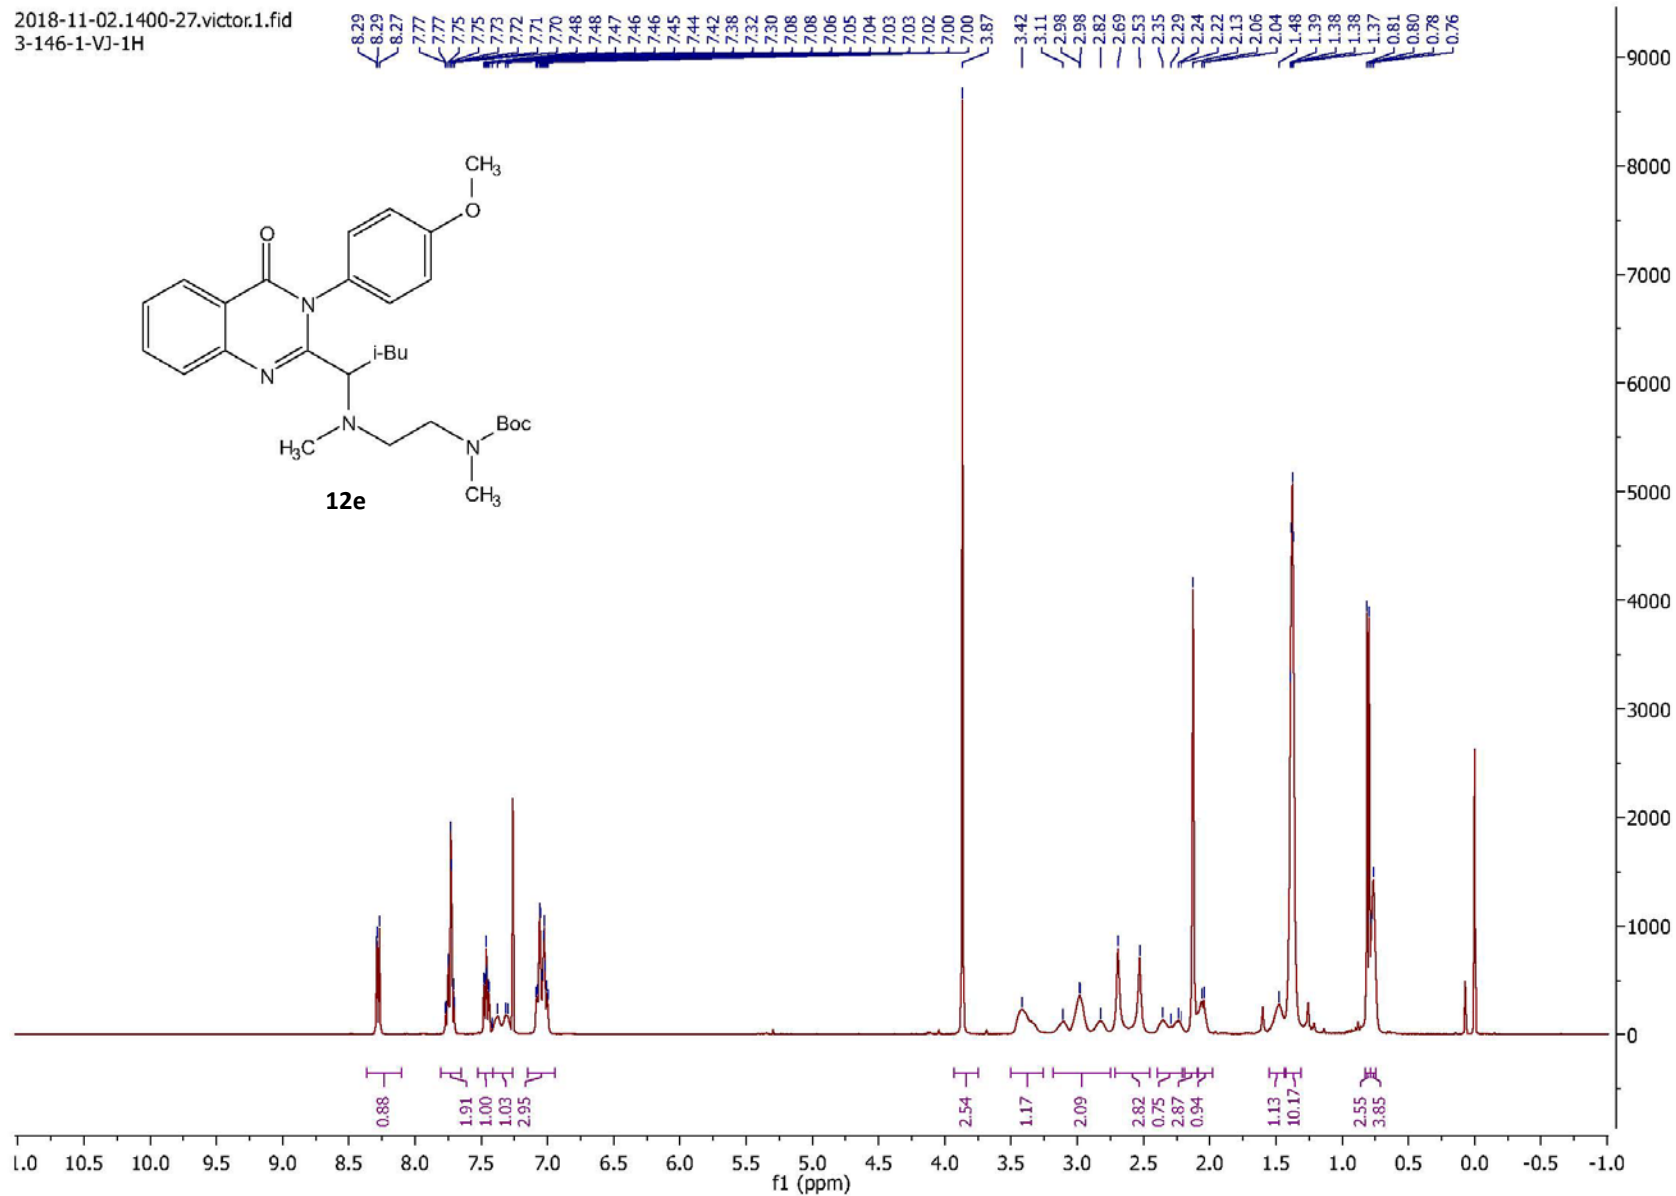



2018-11-02.1400-27.victor.2.fid  
3-146-1-VJ-13C

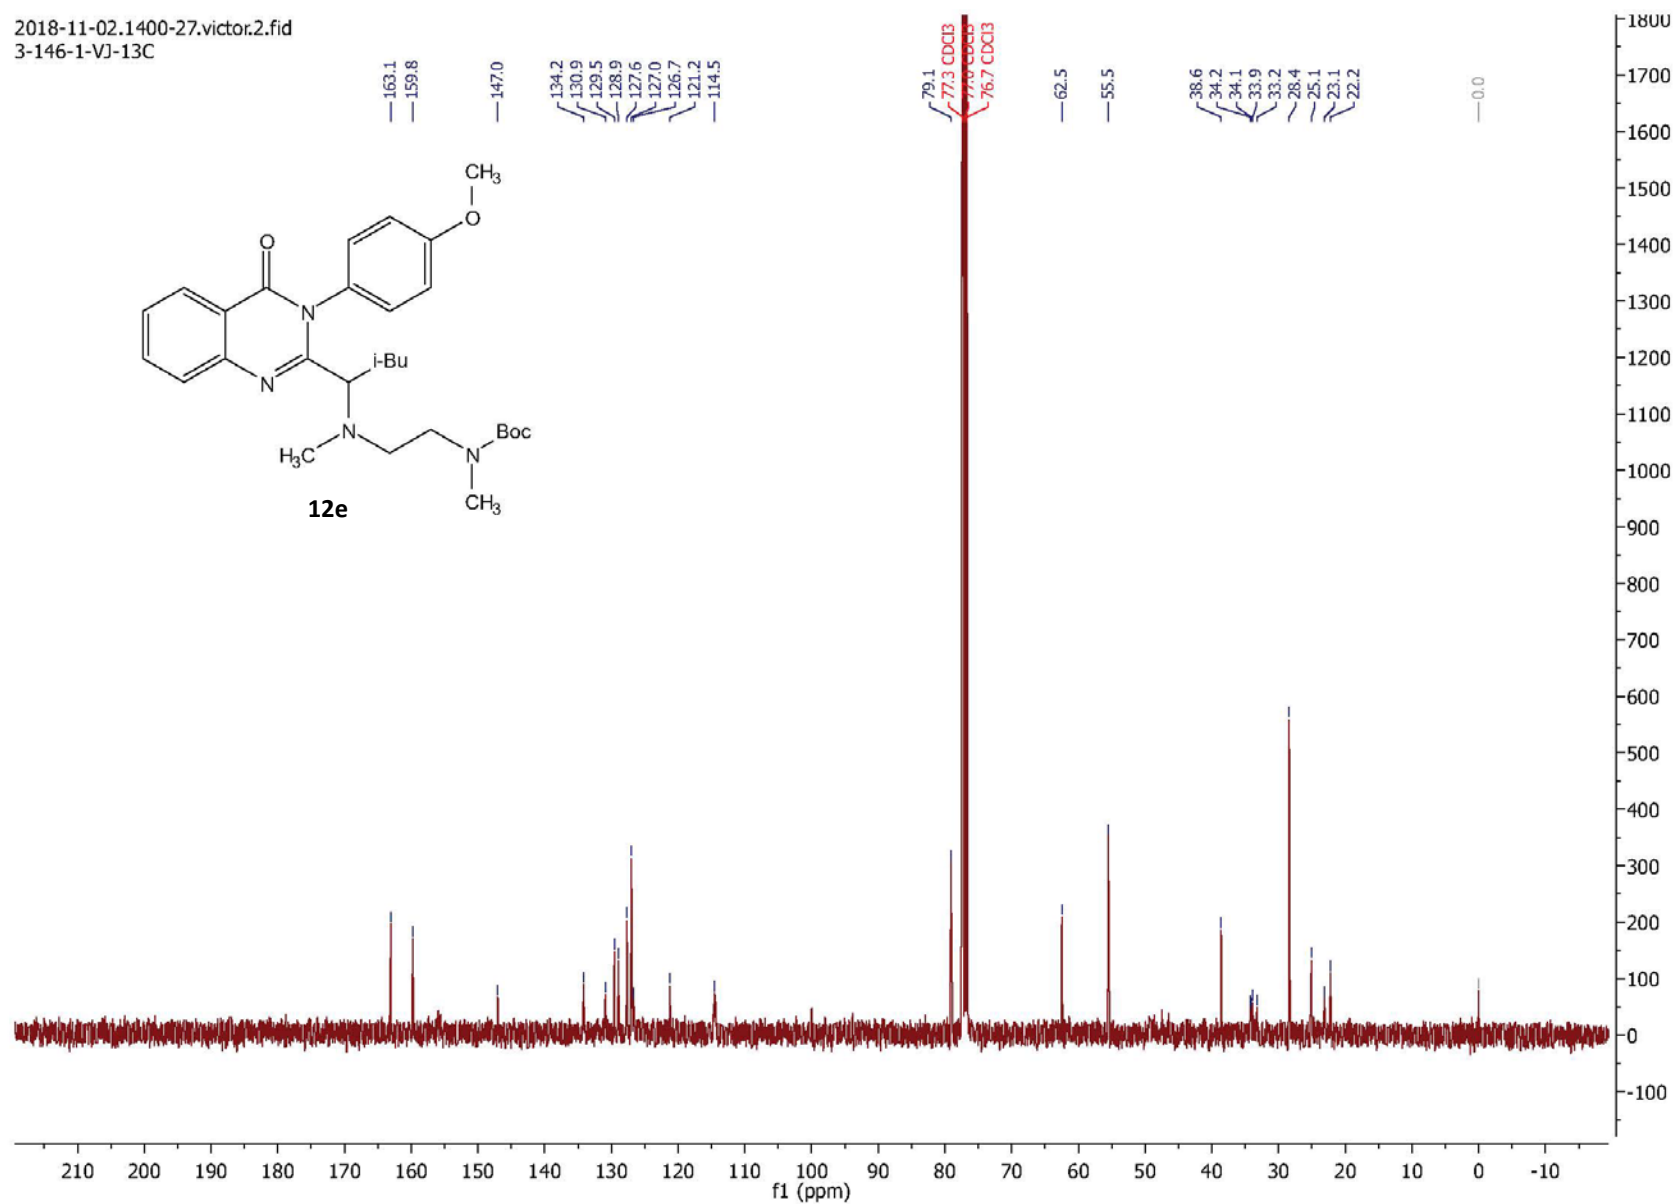

2017-09-30.1658-55.alok.1.fid  
AN-V-022-Proton

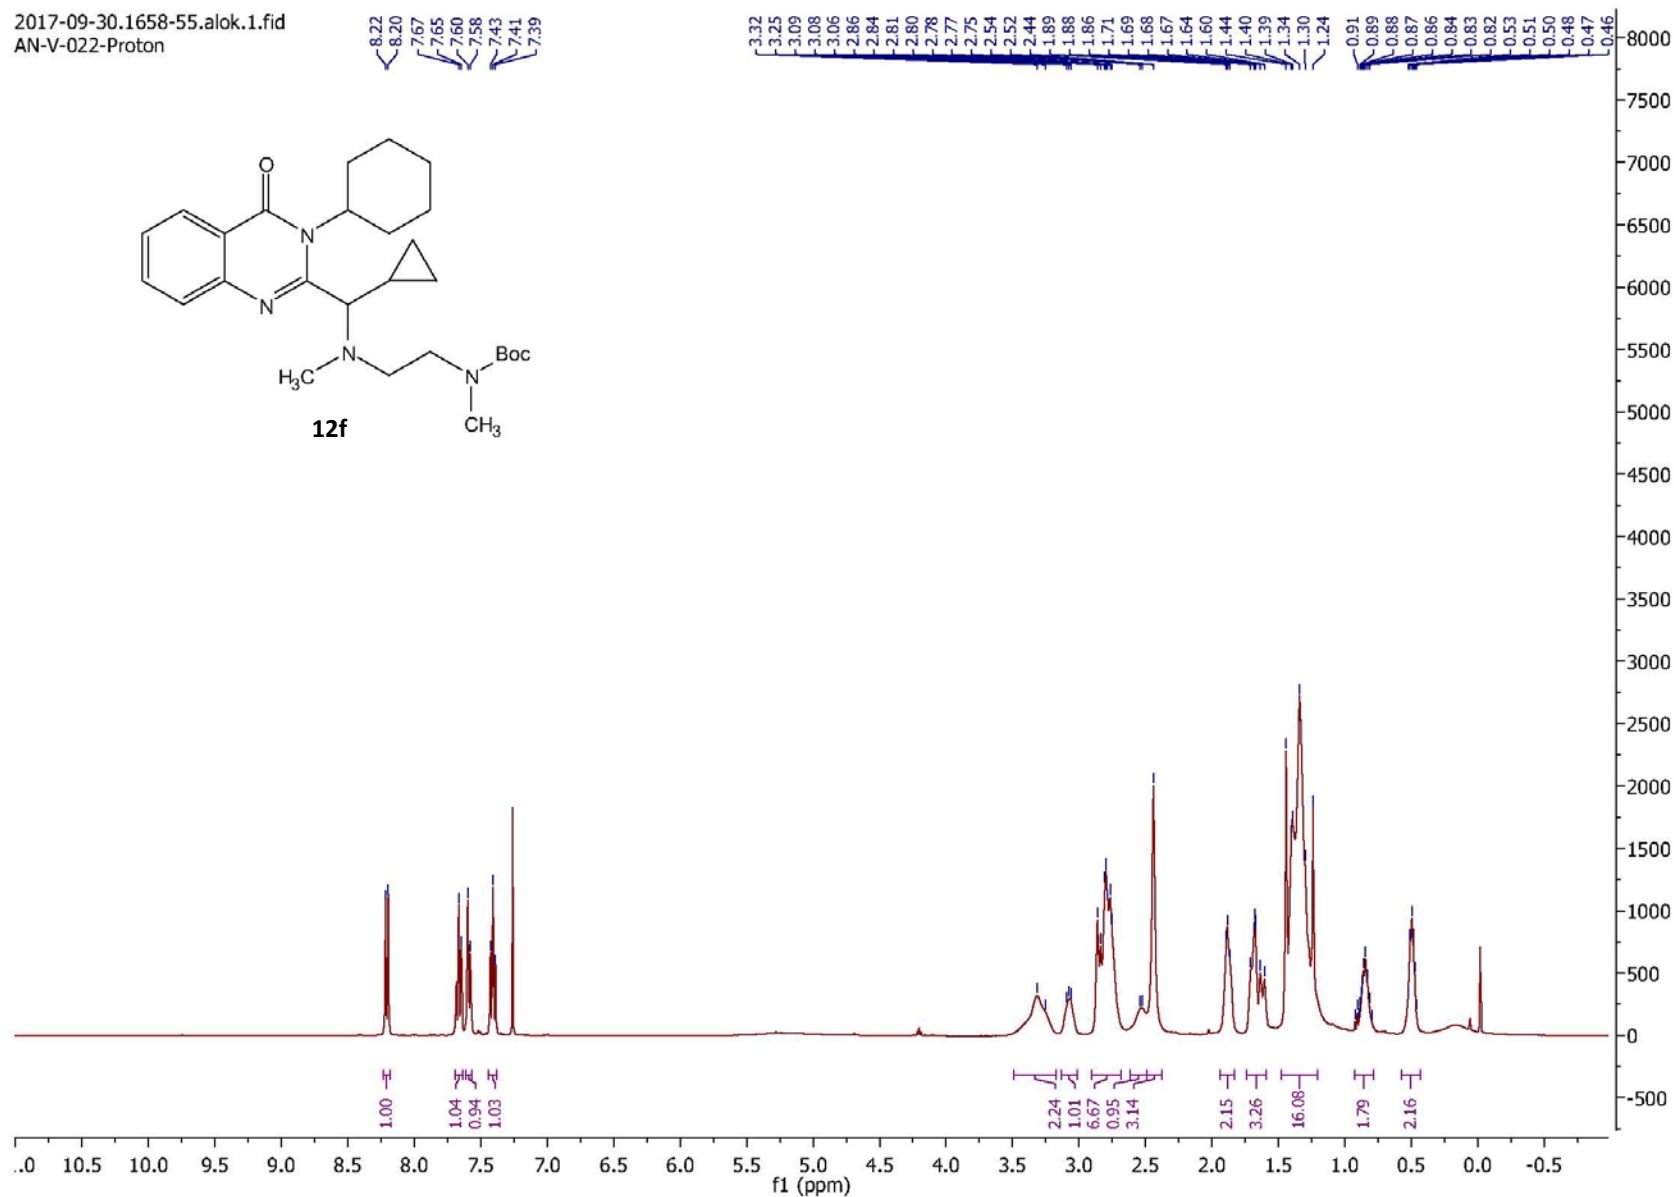

2017-09-30.1658-55.alok.2.fid  
AN-V-022-Carbon

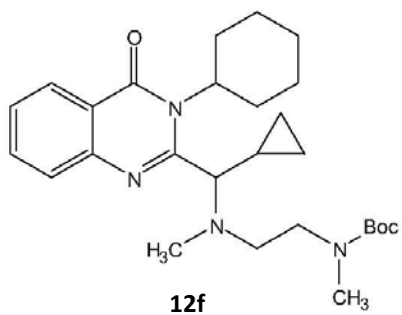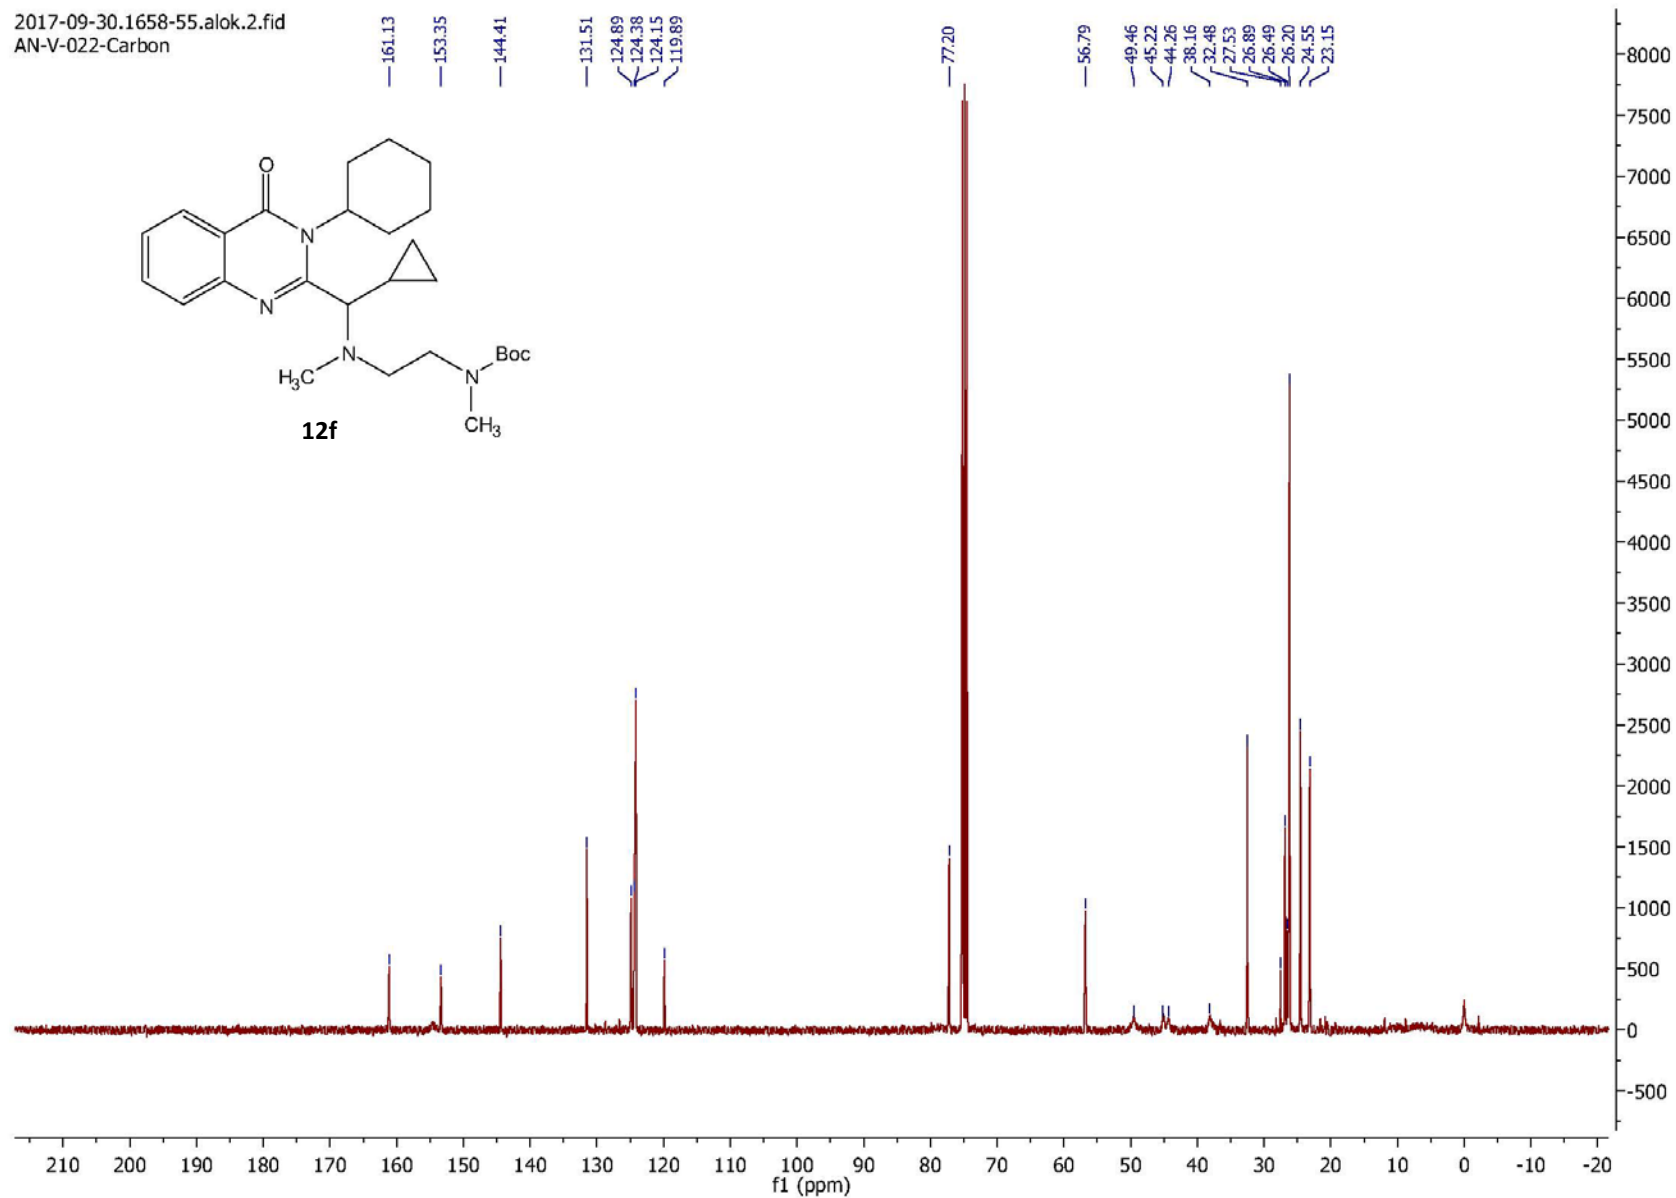

2017-09-01.2014-5.alok.1.fid  
AN-V-99-Proton

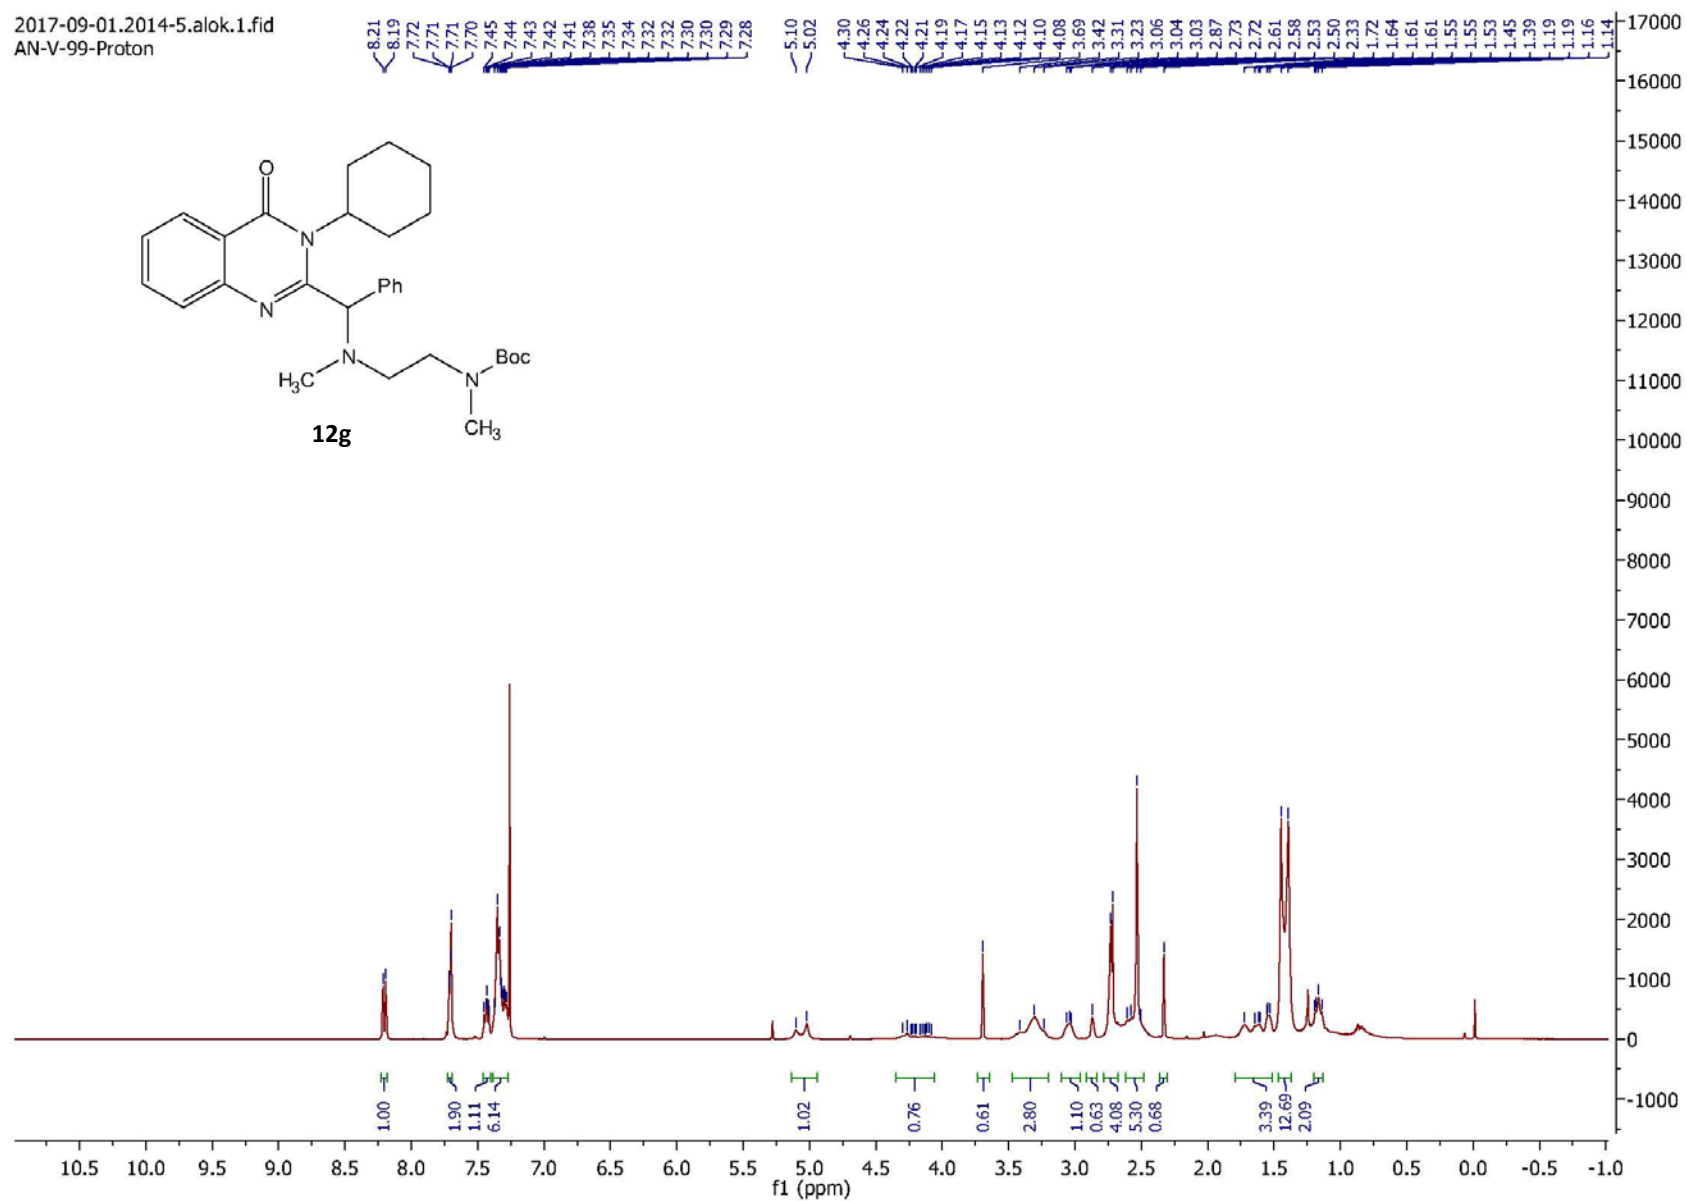

2017-09-01.2014-5.alok.2.fid  
AN-V-99-Carbon

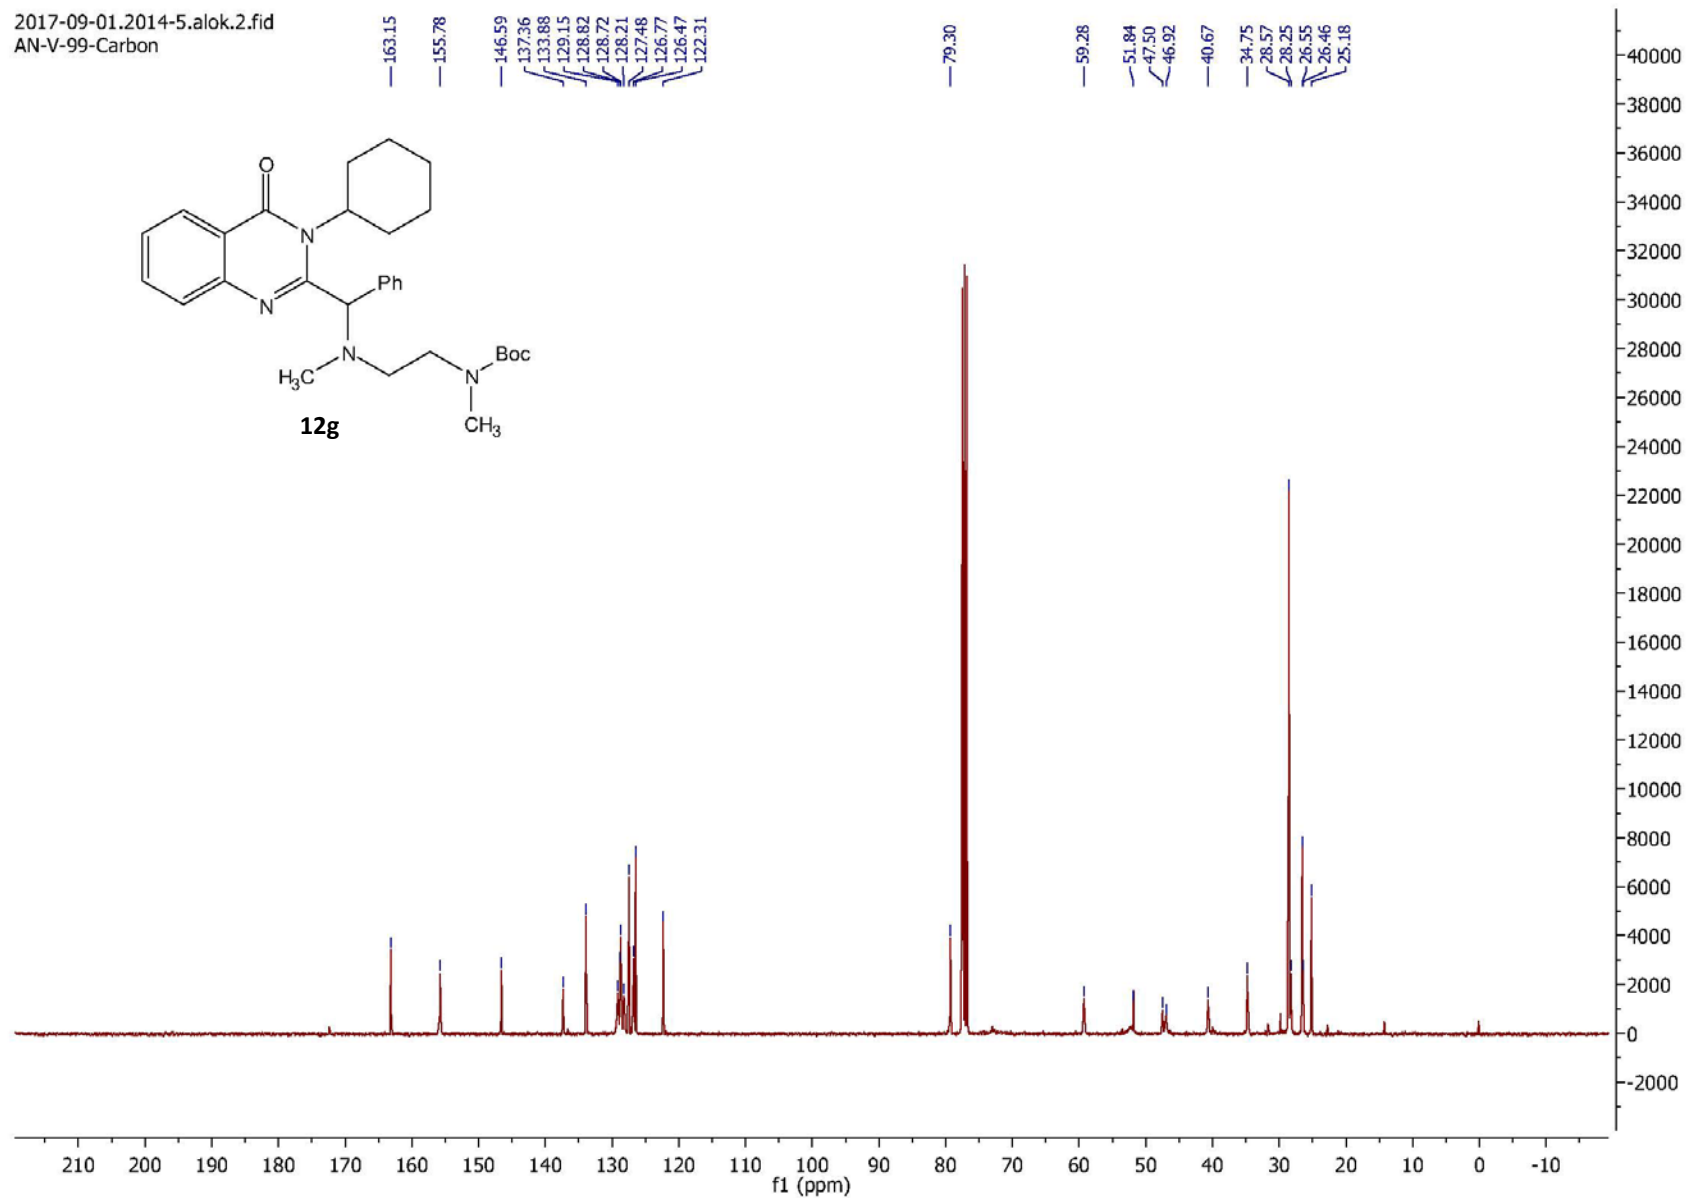

742-58.victor.1.fid

8.23 8.23 8.21 8.21 7.70 7.69 7.67 7.66 7.65 7.60 7.60 7.58 7.58 7.43 7.42 7.41 7.39 7.39





**12h**

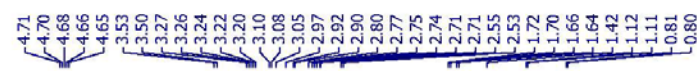

2018-11-12.1742-58.victor.2.fid  
AN-V-72

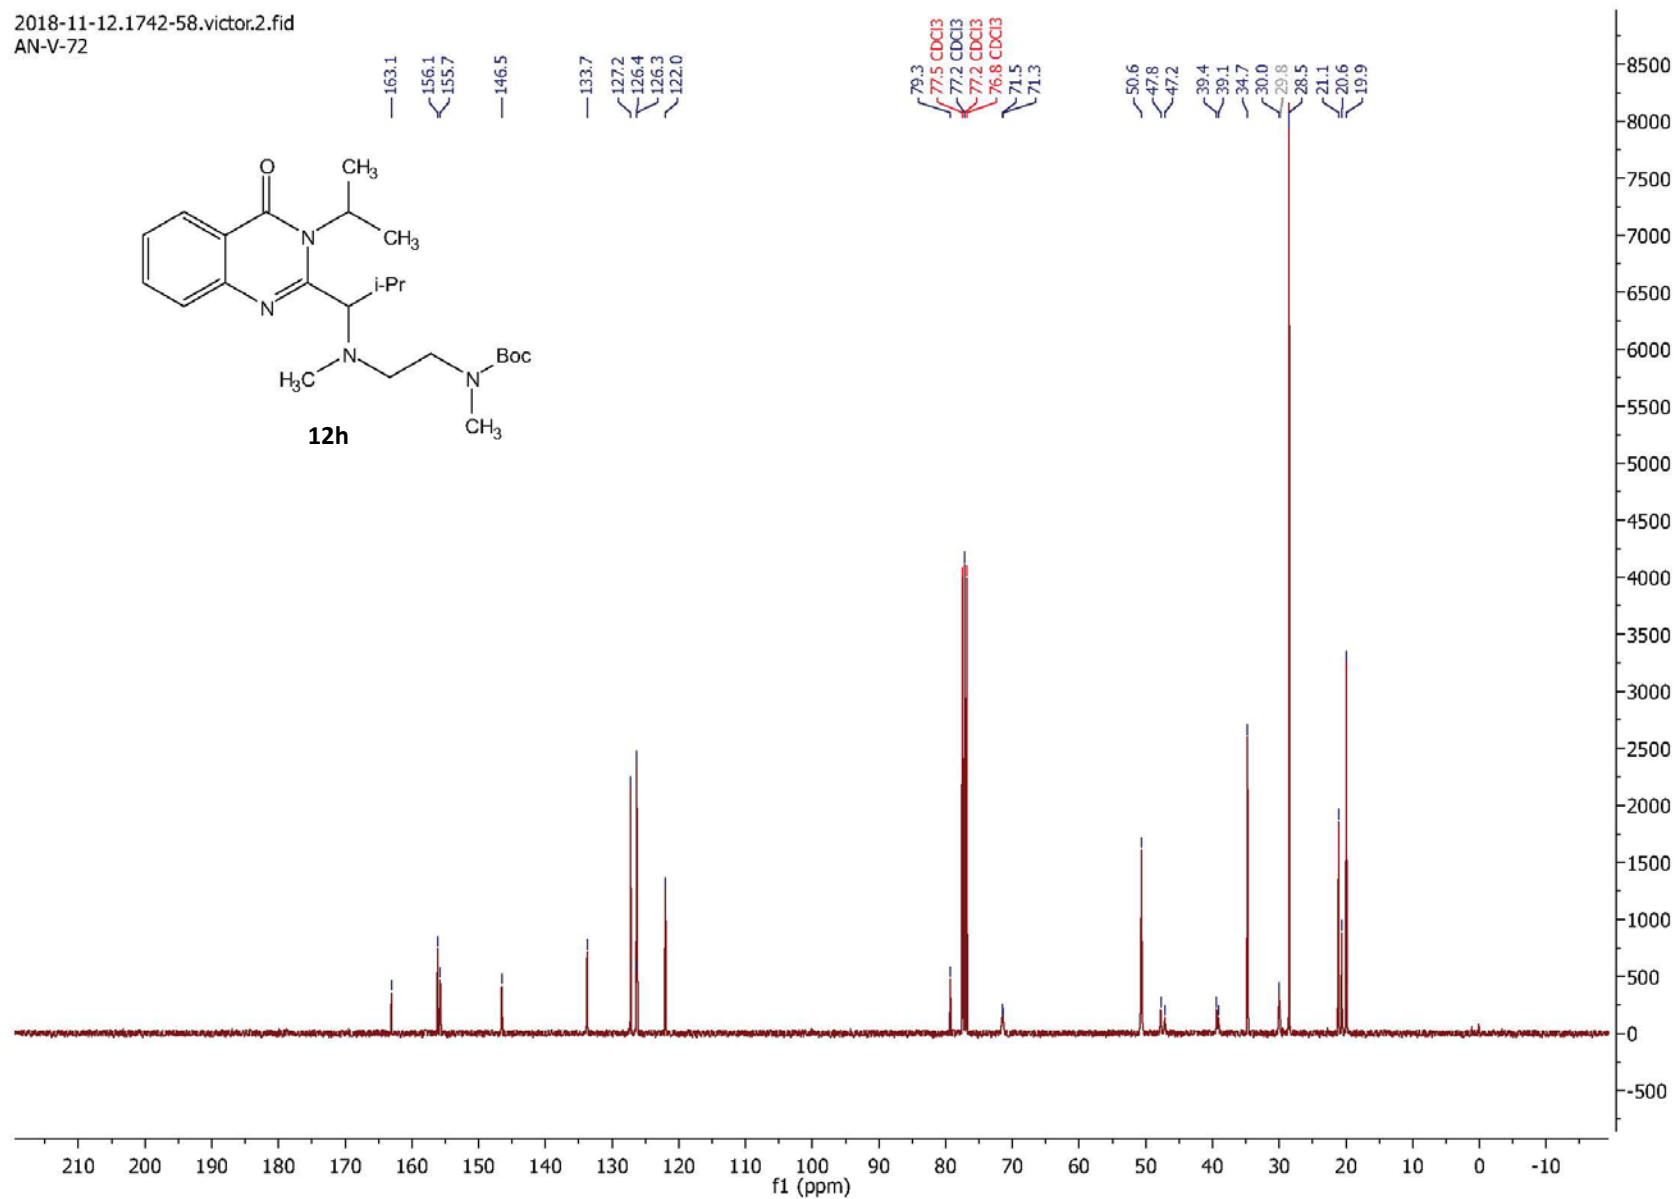

2017-07-10.2112-23.alok.1.fid  
AN-V-67-Proton

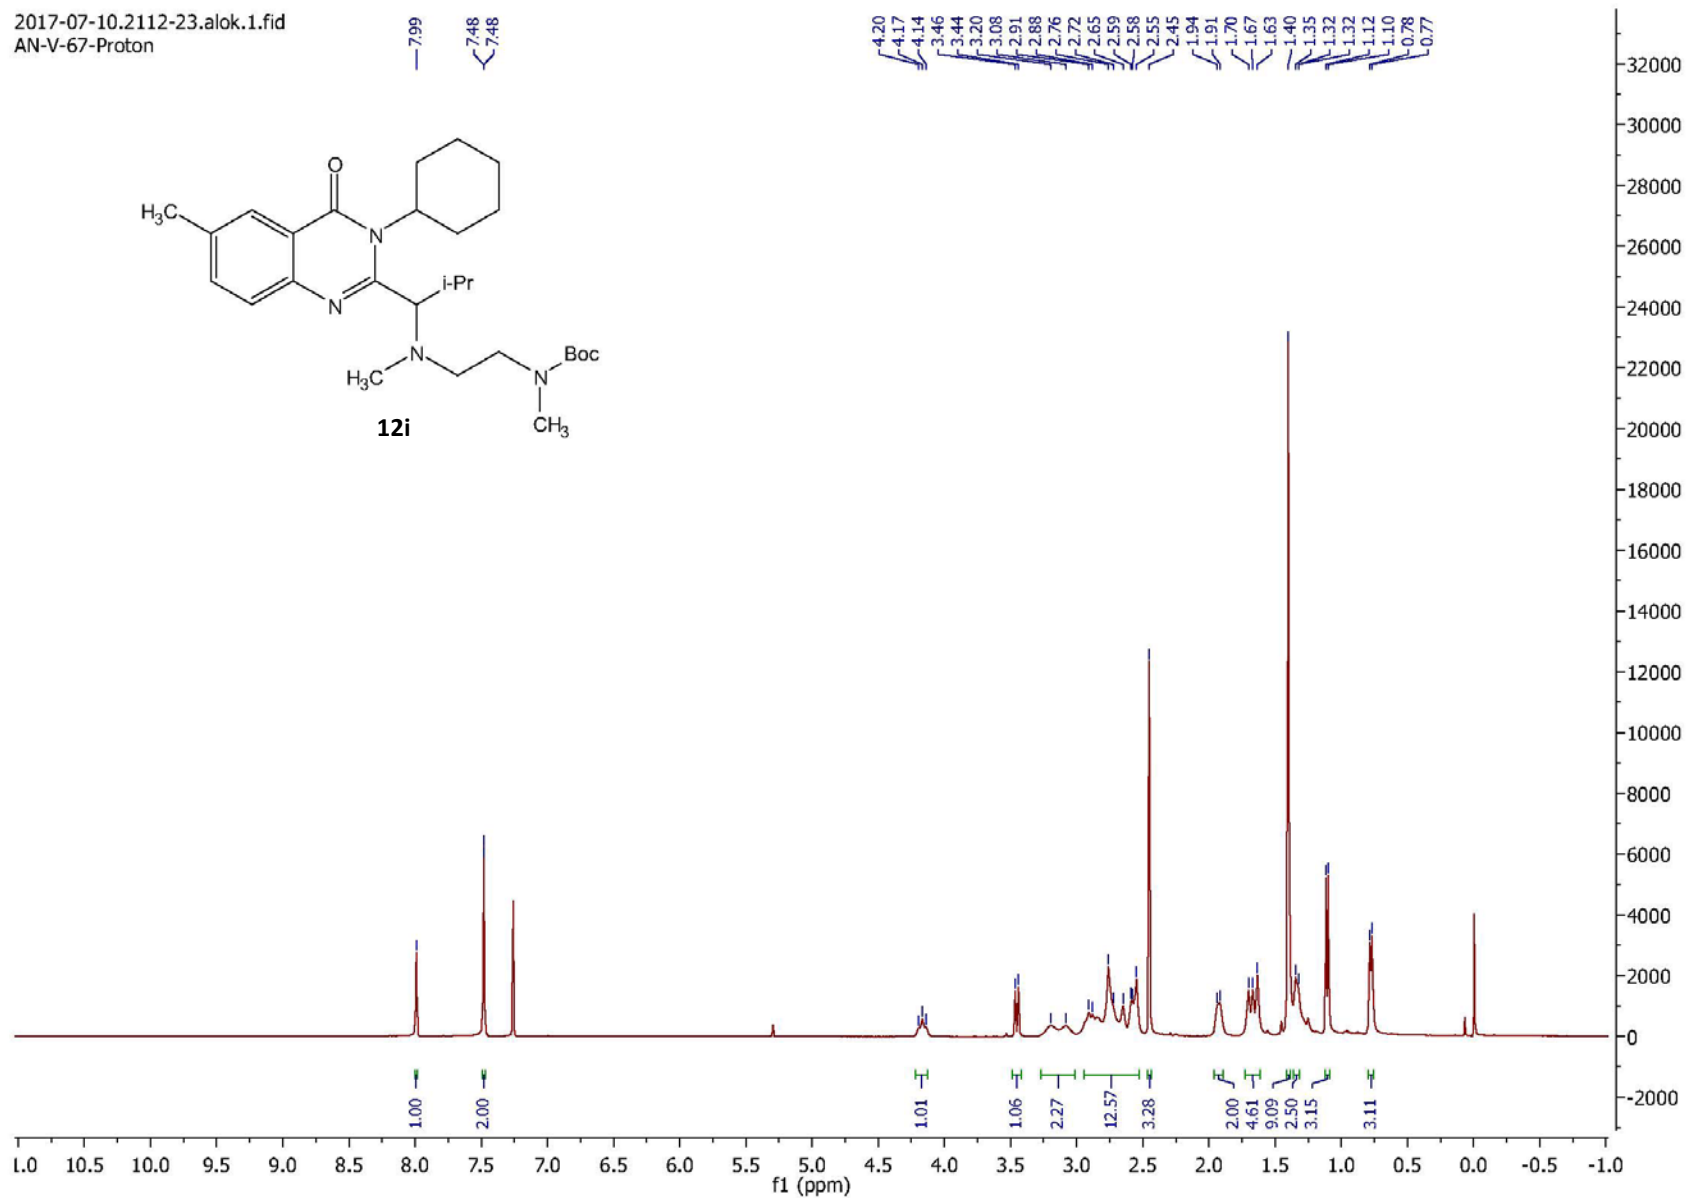



2017-07-10.2112-23.alok.2.fid  
AN-V-67-carbon

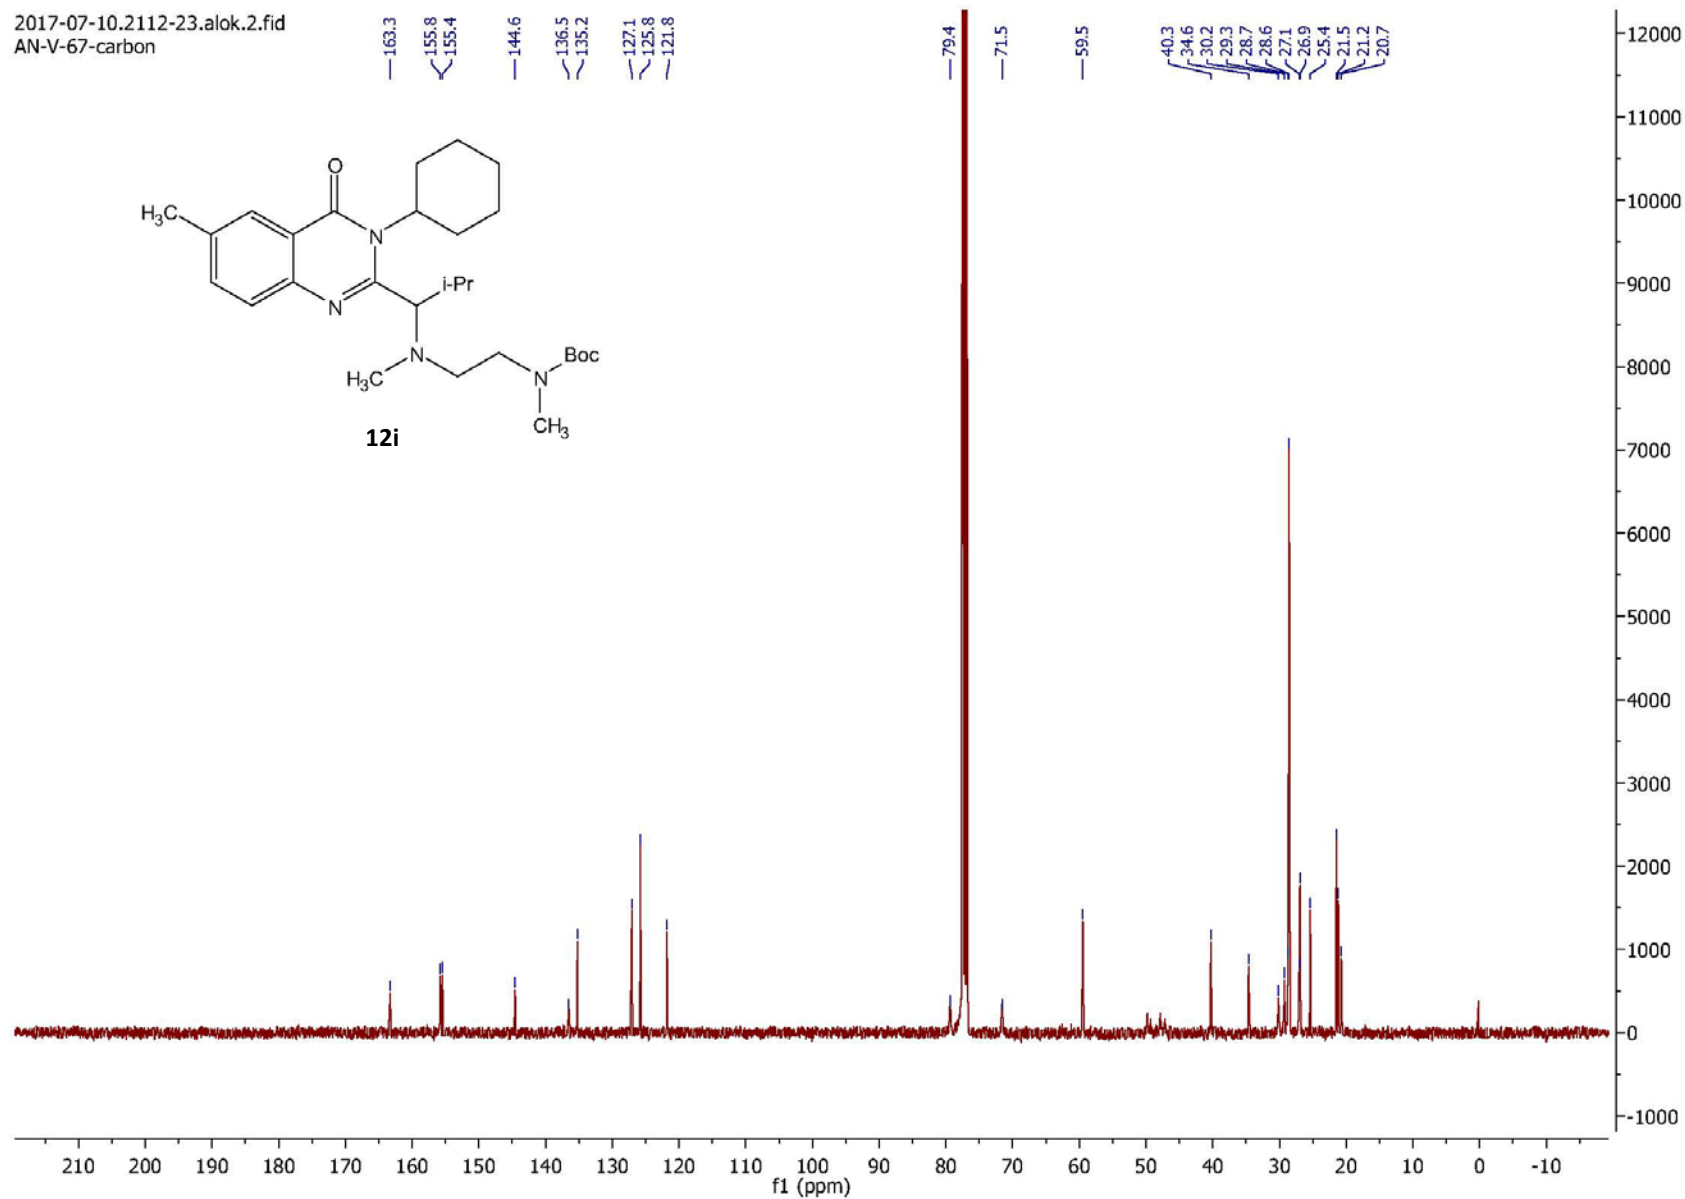

2018-11-06.1044-31.victor.1.fid  
AN-V-48-1H

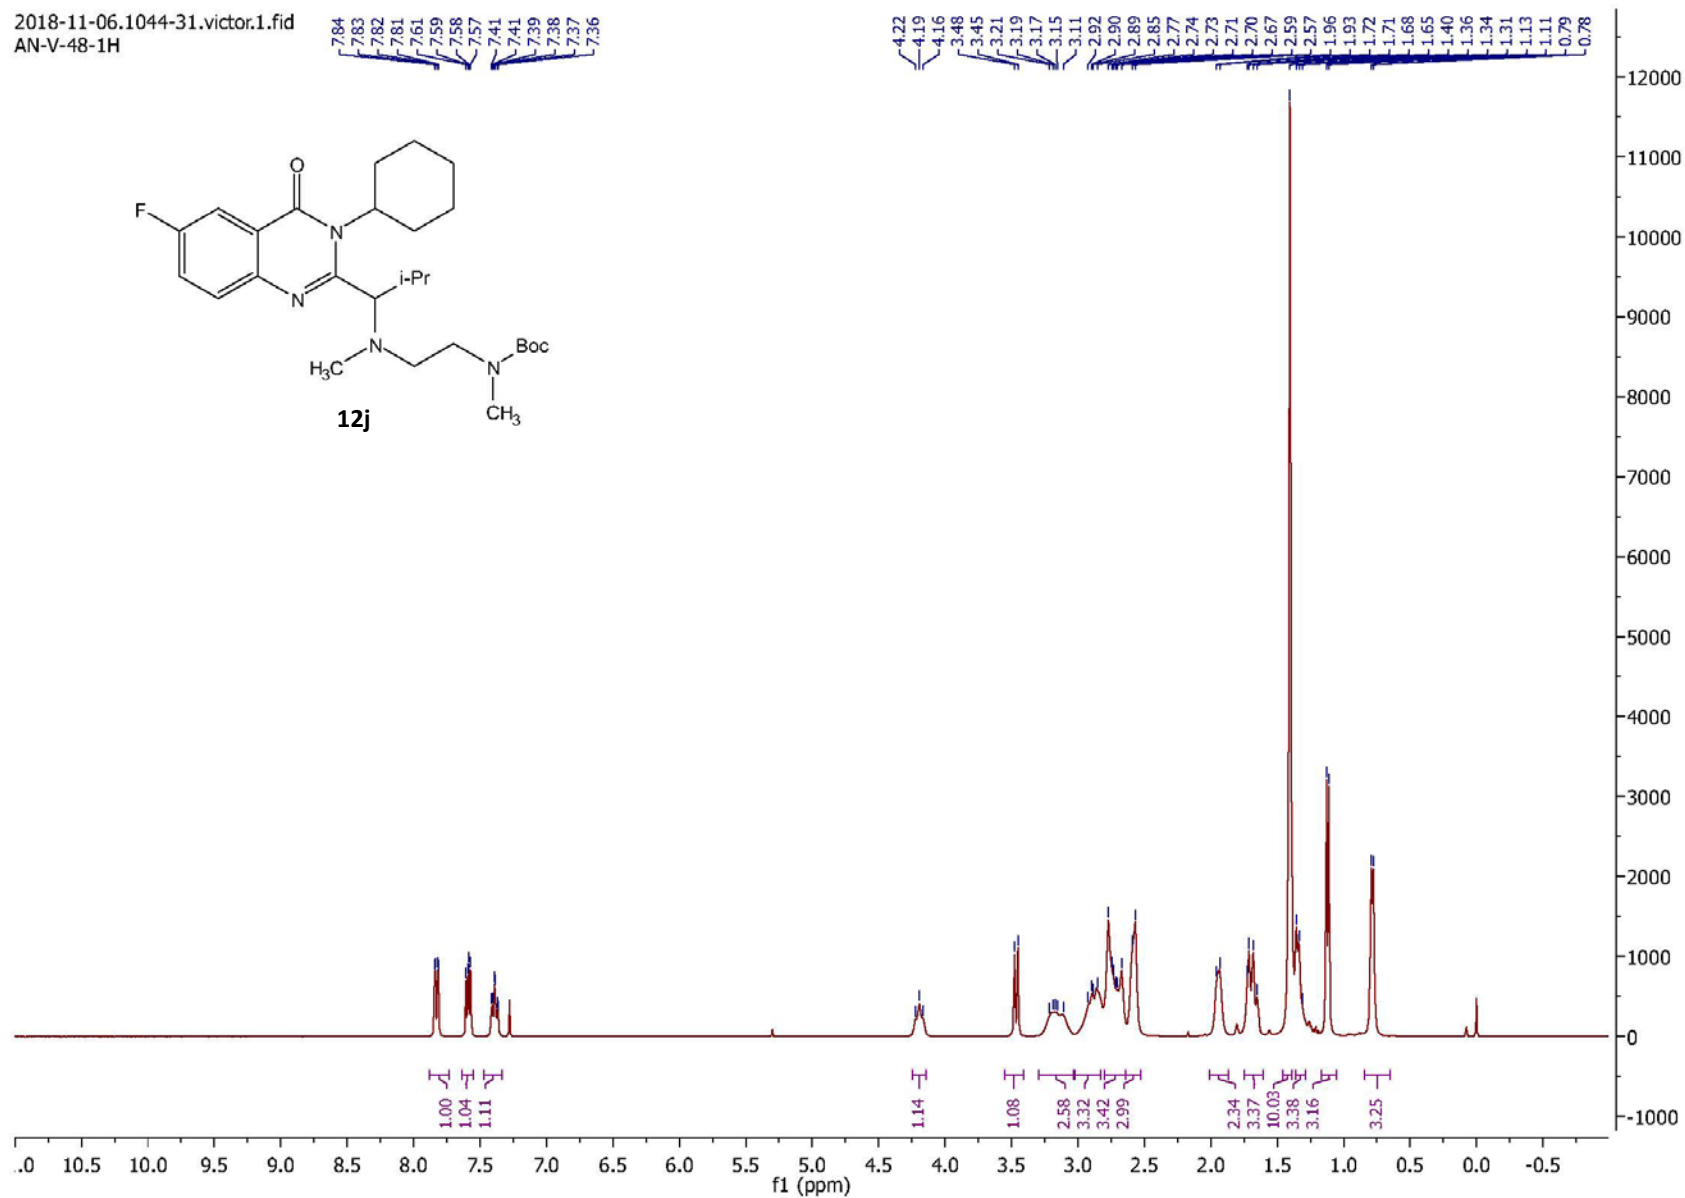

2018-11-06.1044-31.victor.3.fid  
AN-V-48-19F

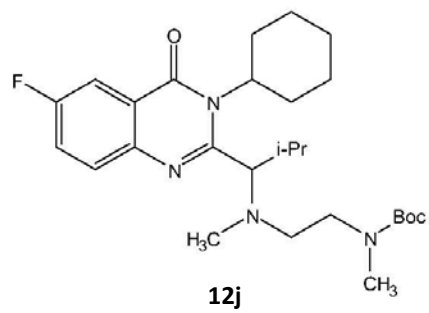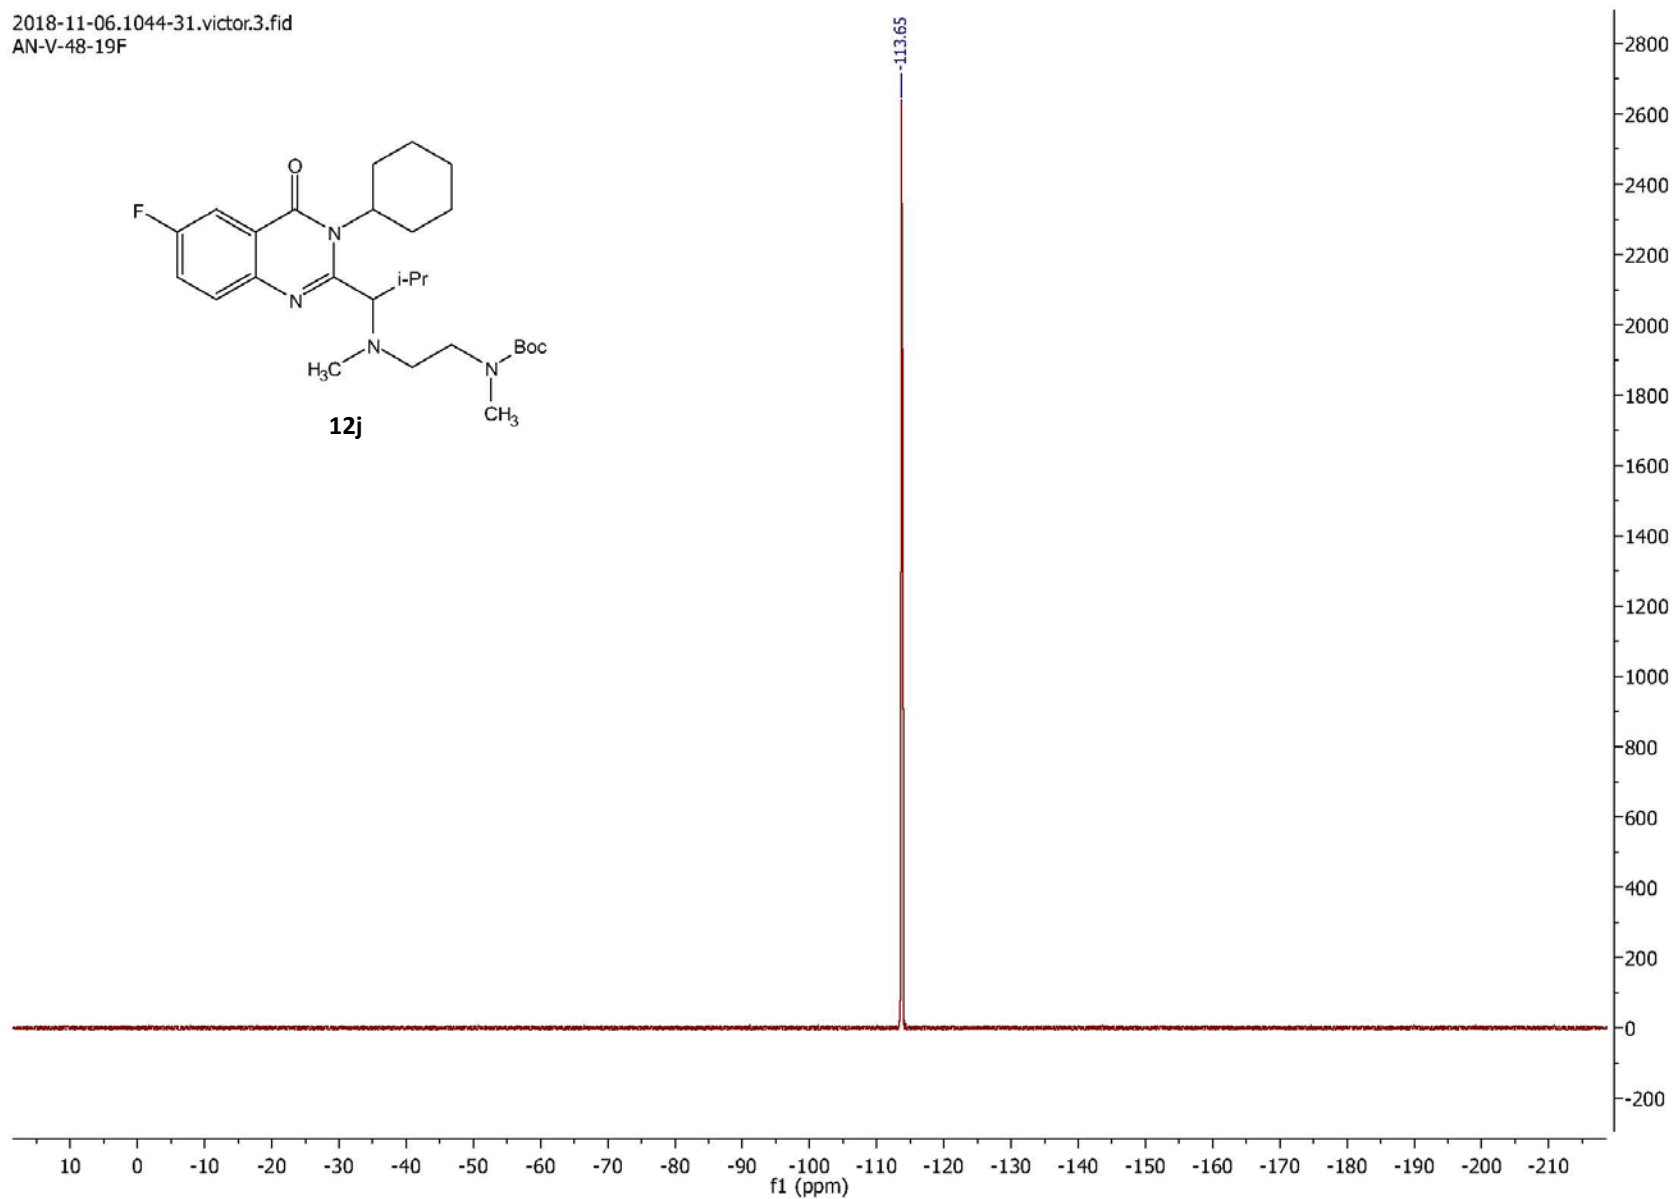

2018-11-06.1044-31.victor.4.fid  
AN-V-48-19F

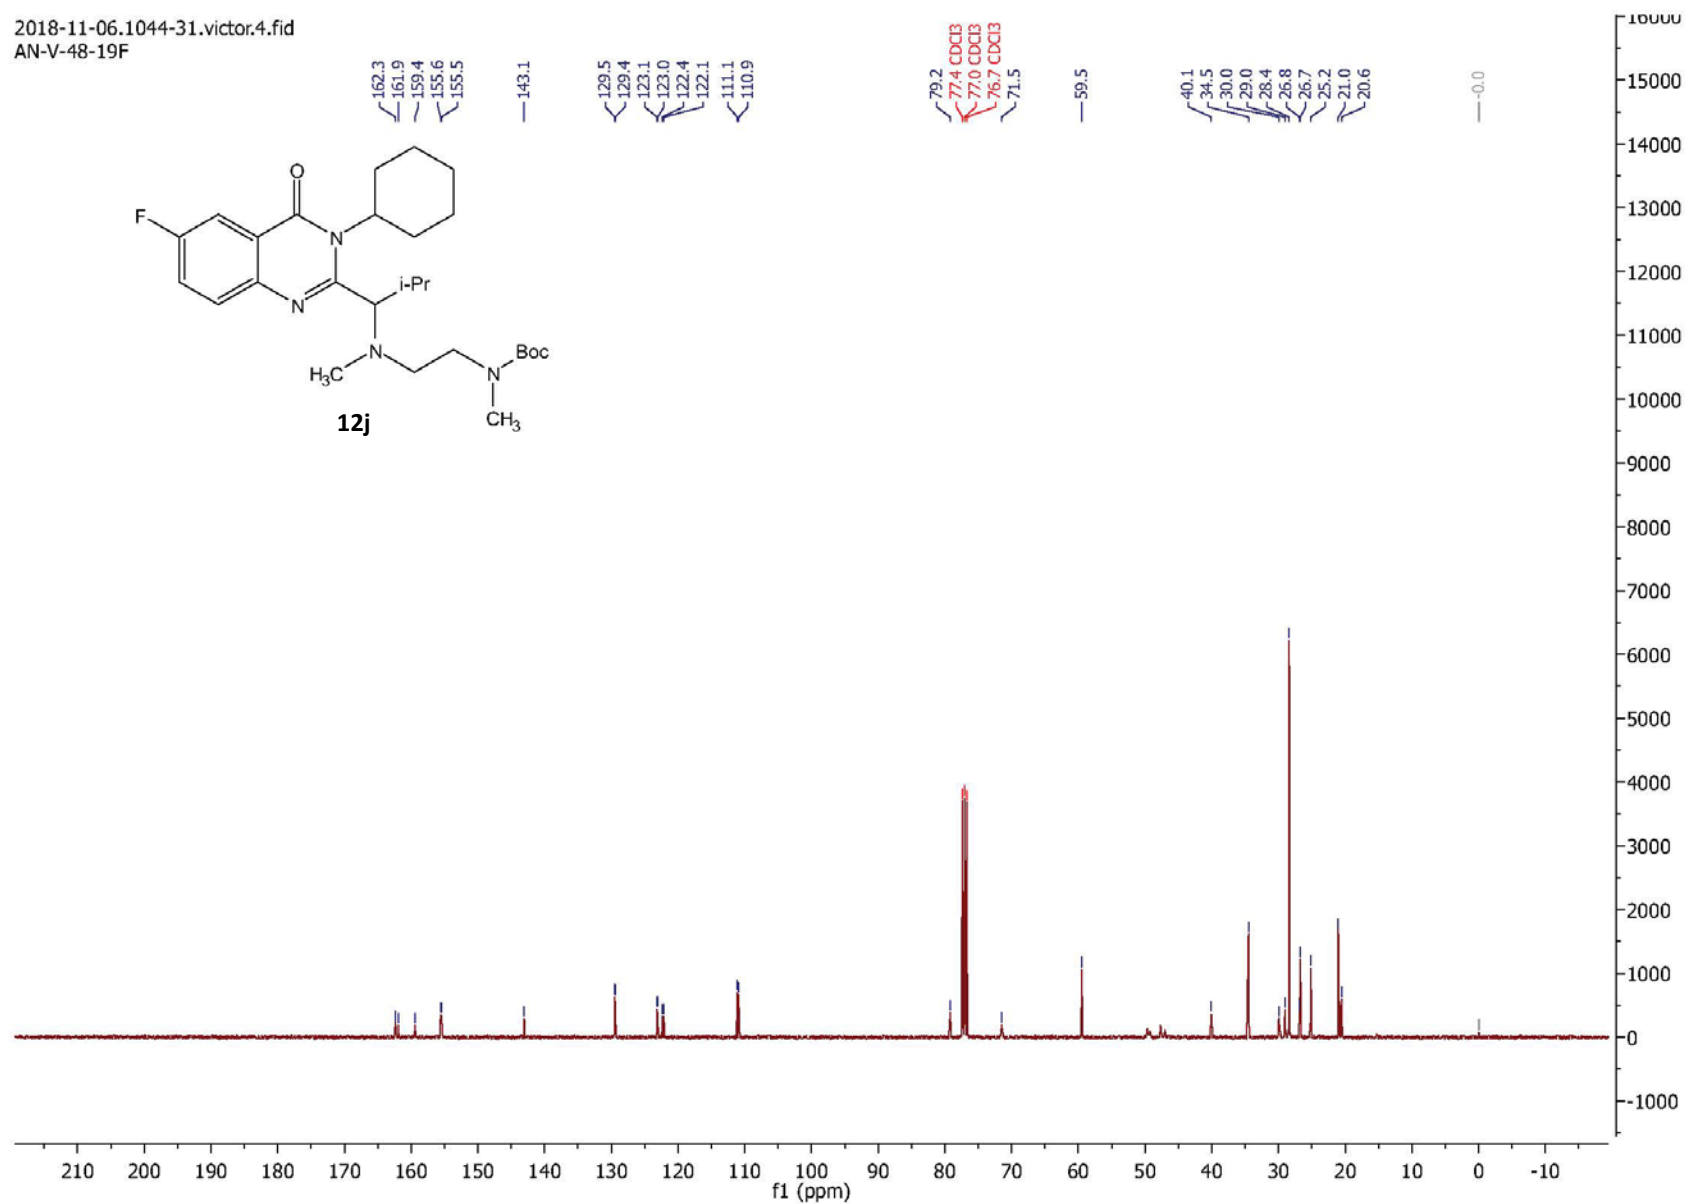

2017-08-10.1018-52.alok.1.fid  
AN-V-71-2-Proton

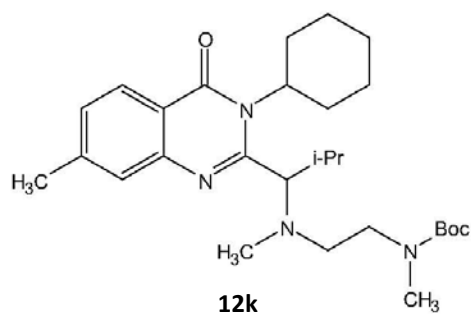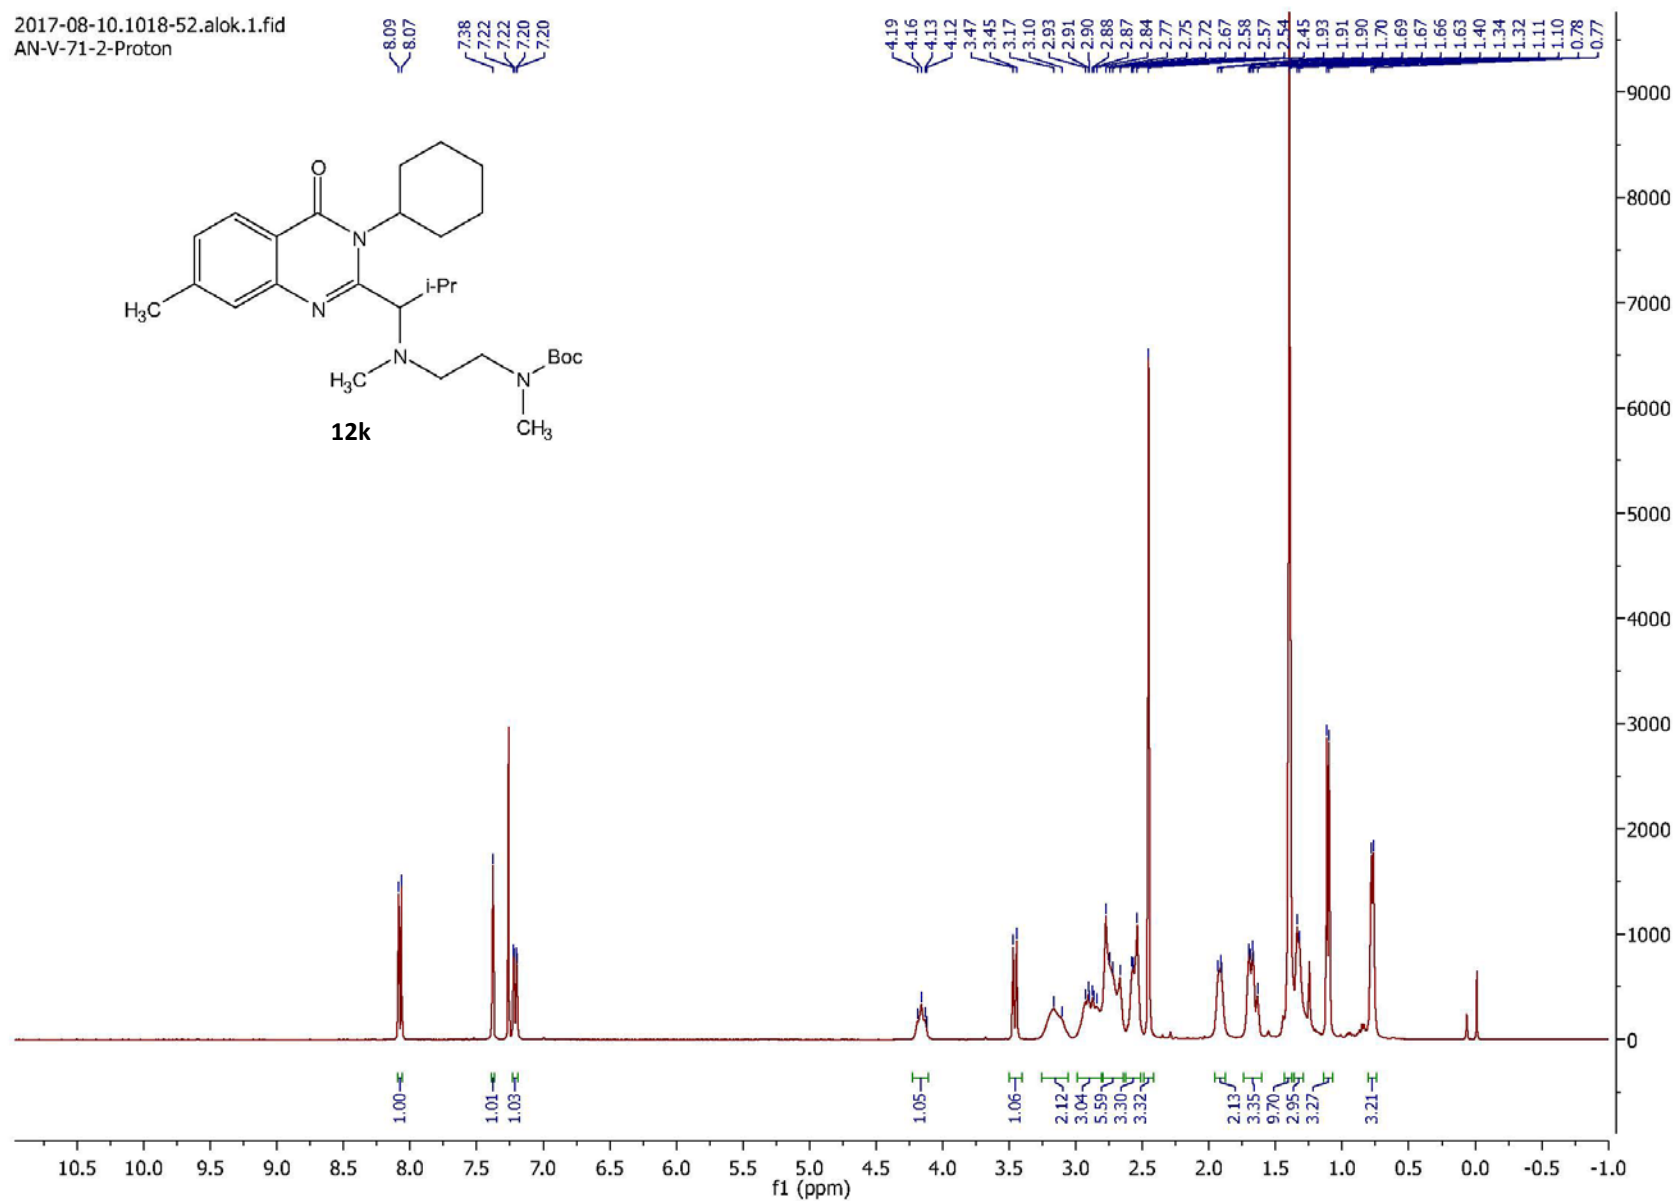

2017-08-10.1018-52.alok.2.fid  
AN-V-71-2-Carbon

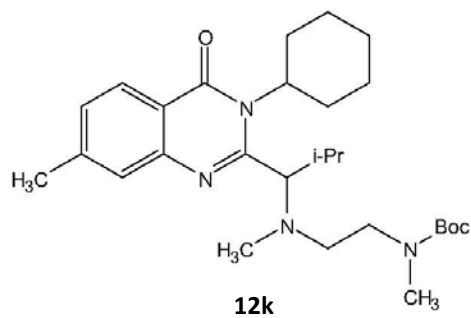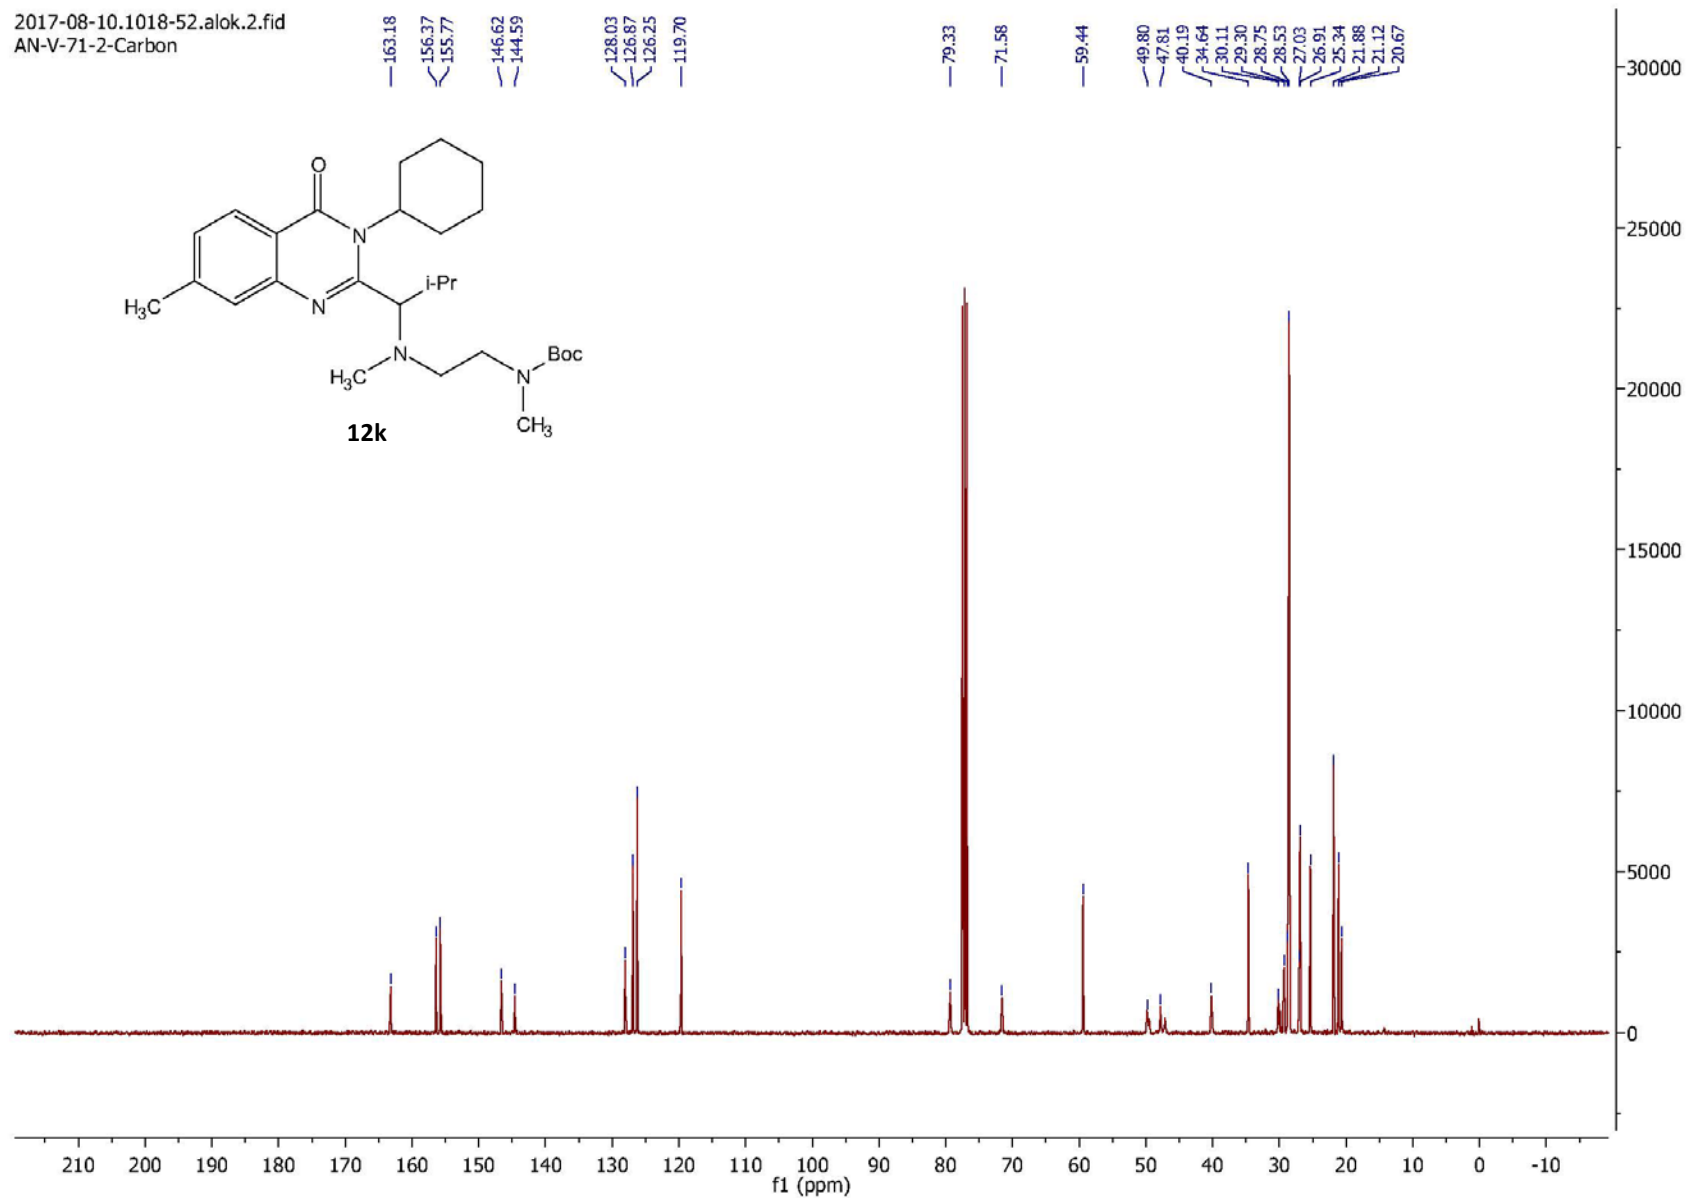

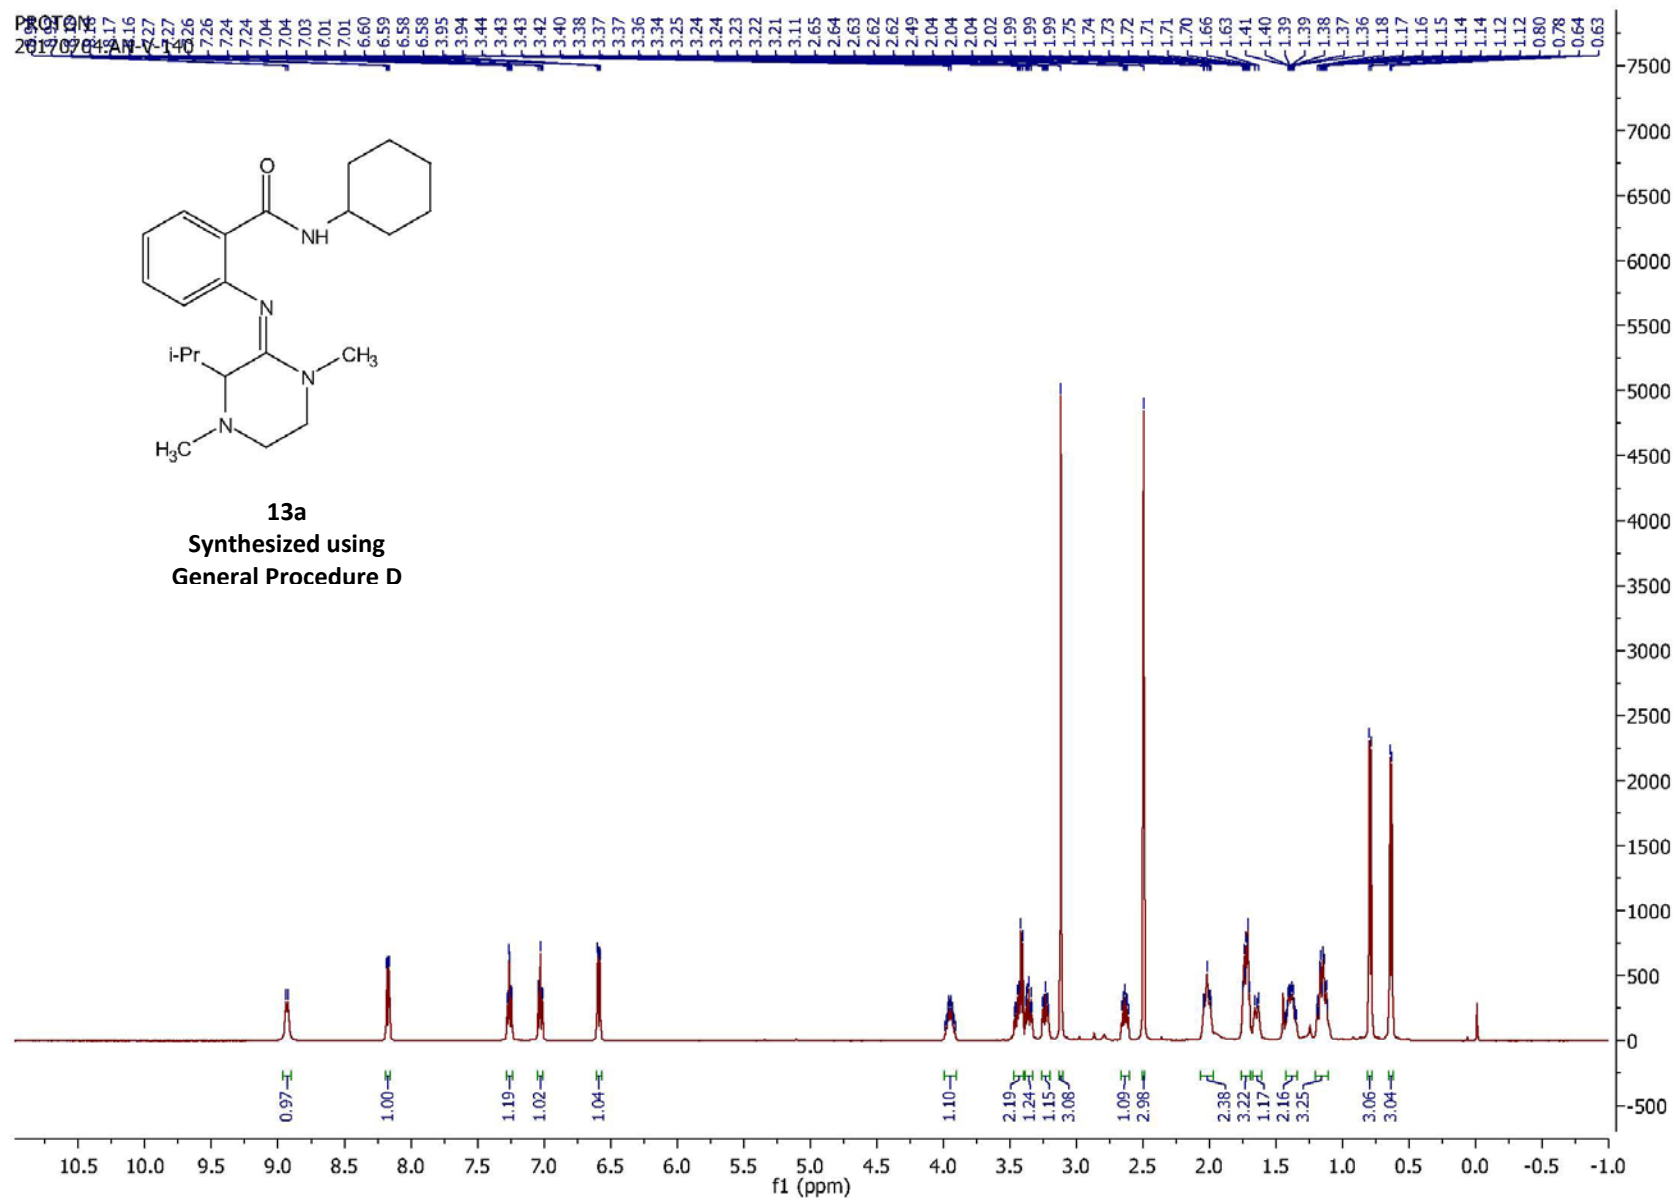

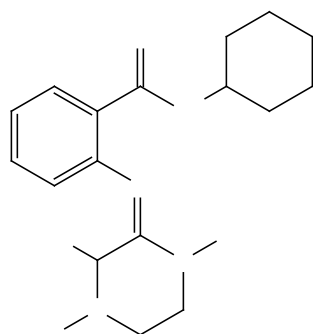

**13a**  
Synthesized using  
General Procedure E

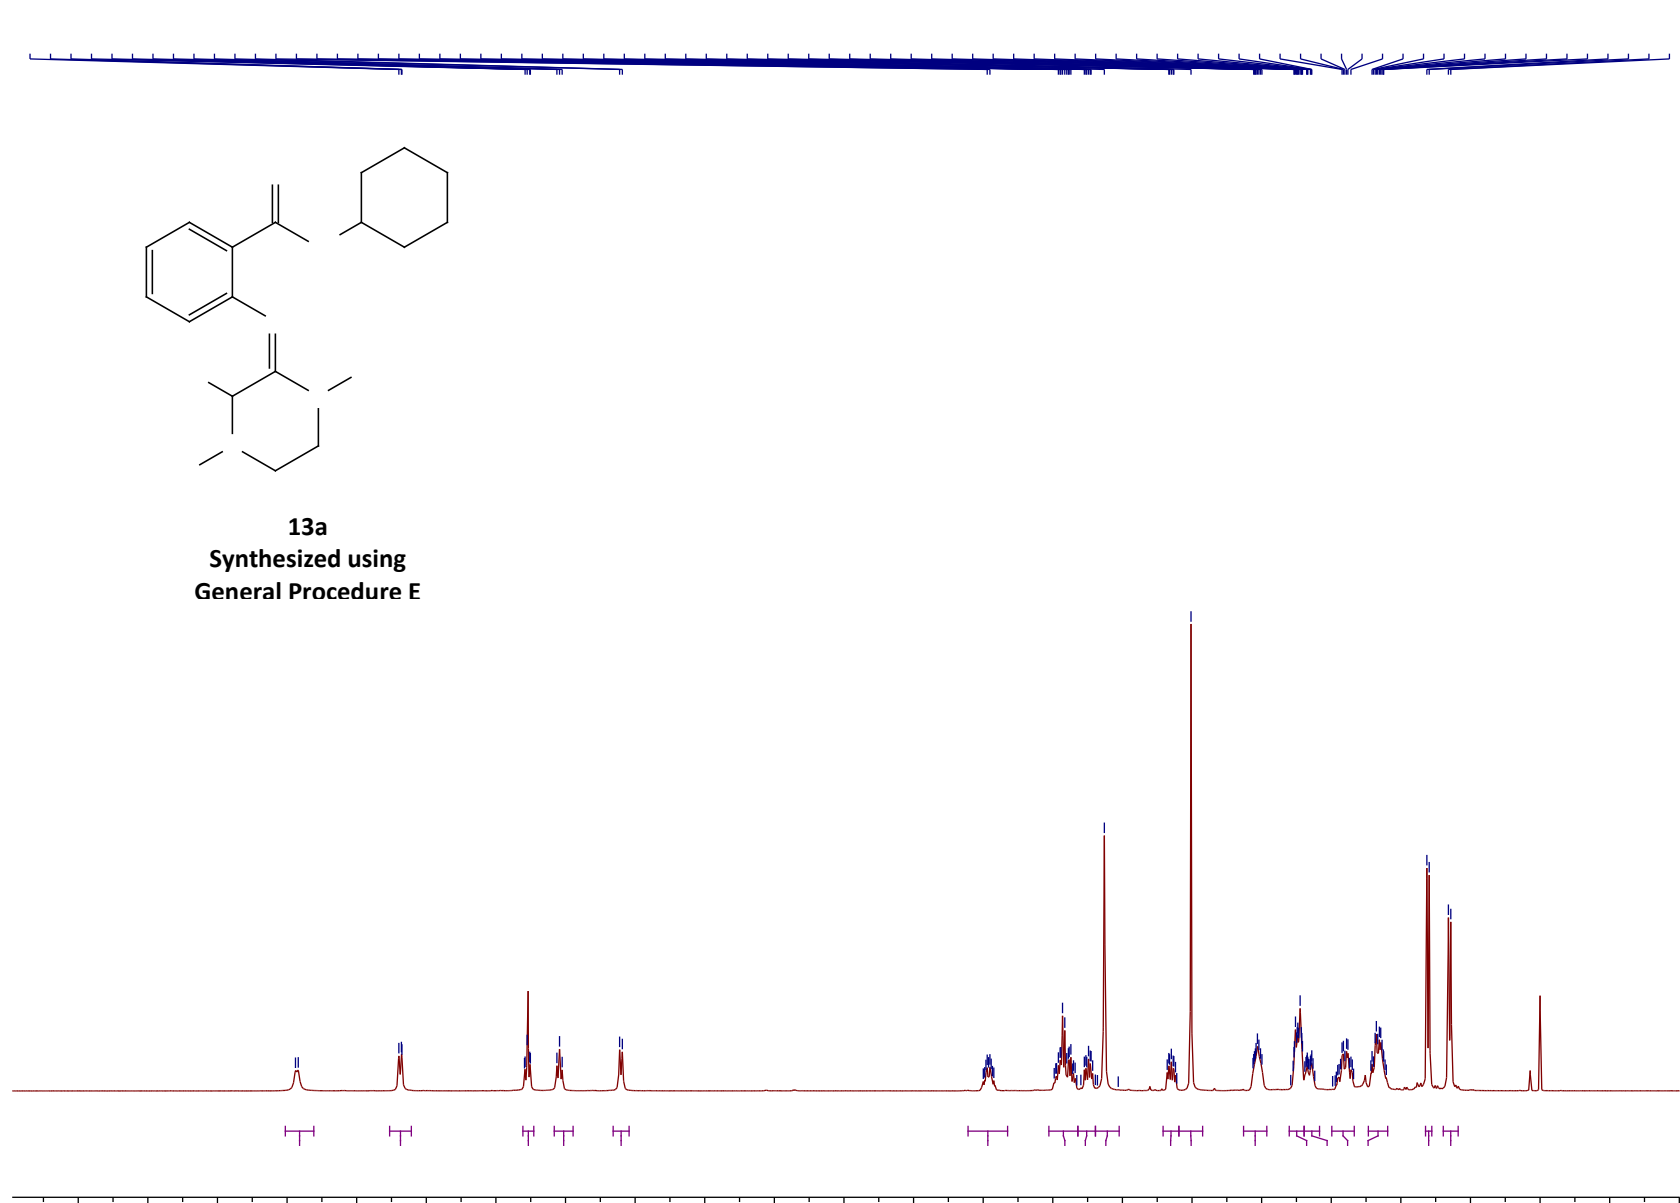



CARBON  
20170704.AN-V-140

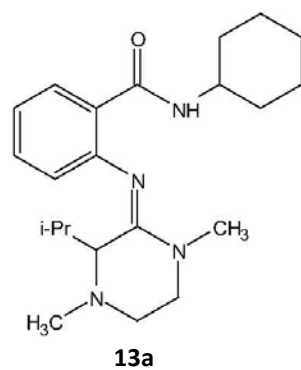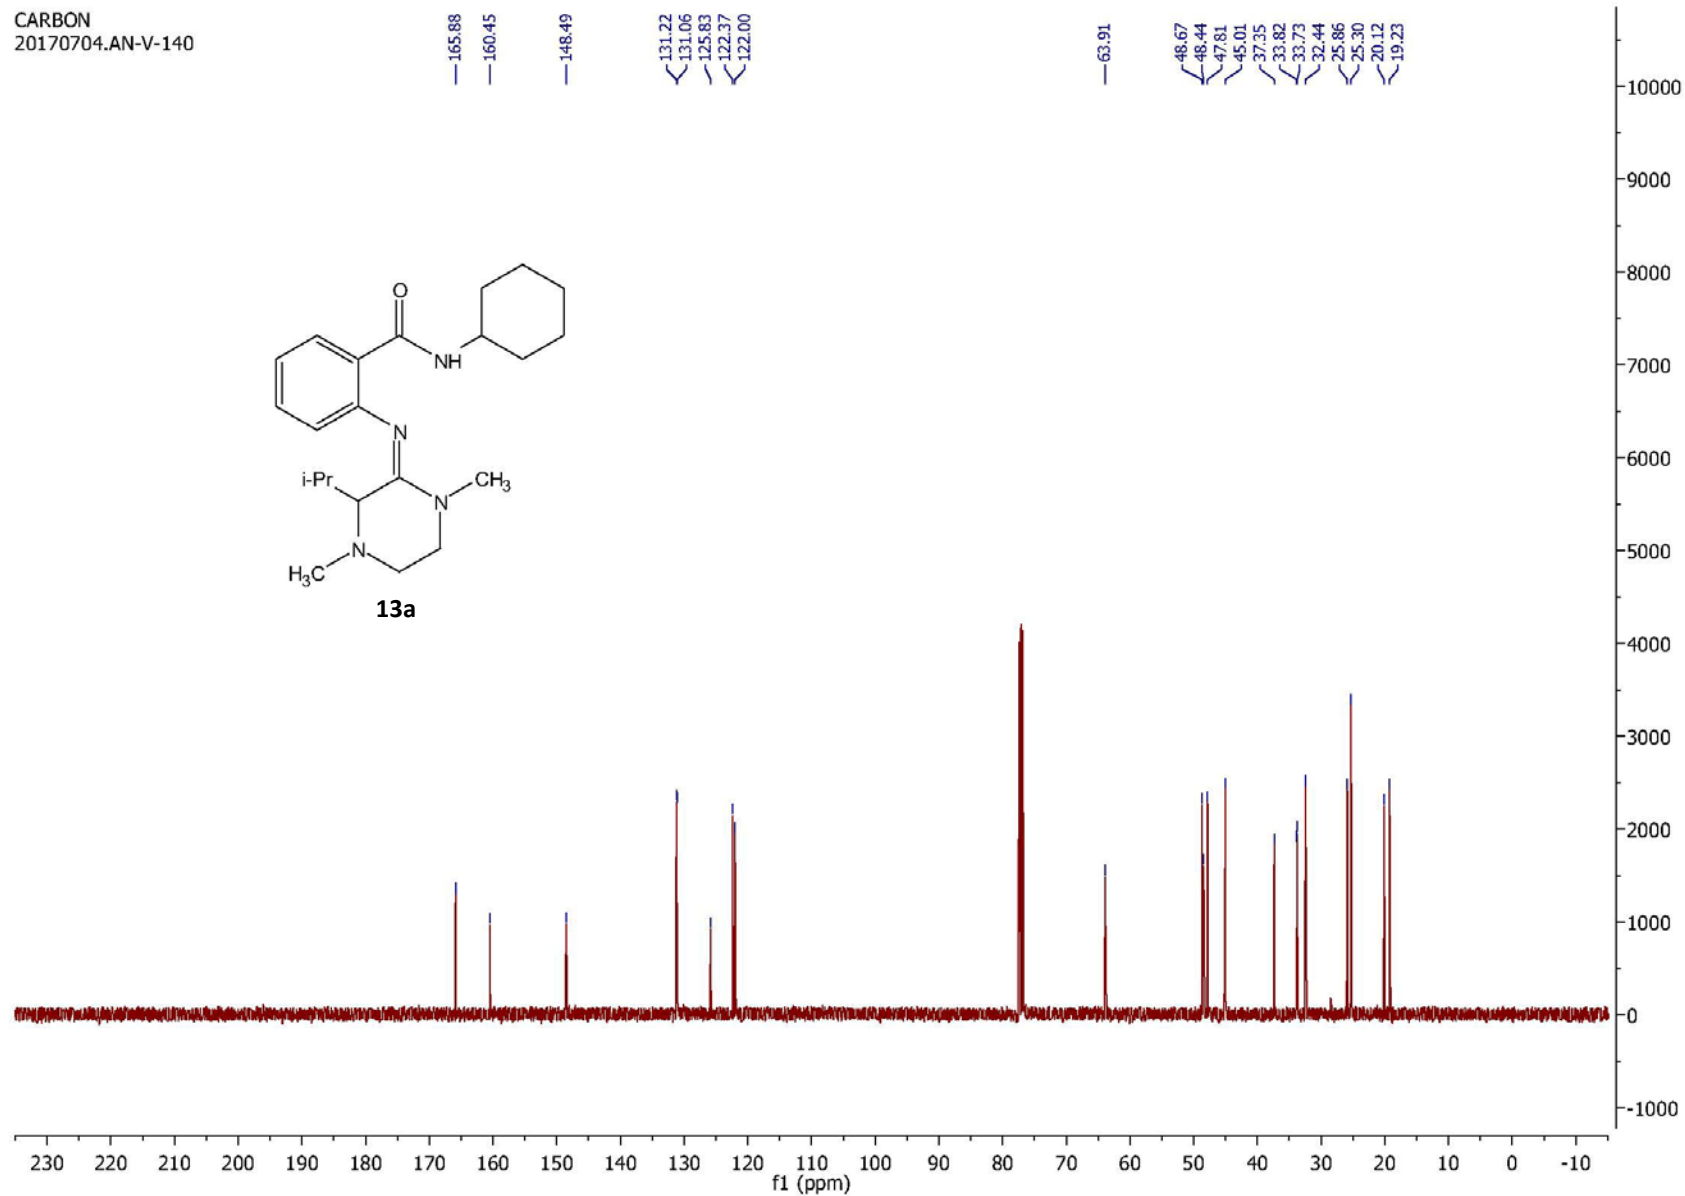

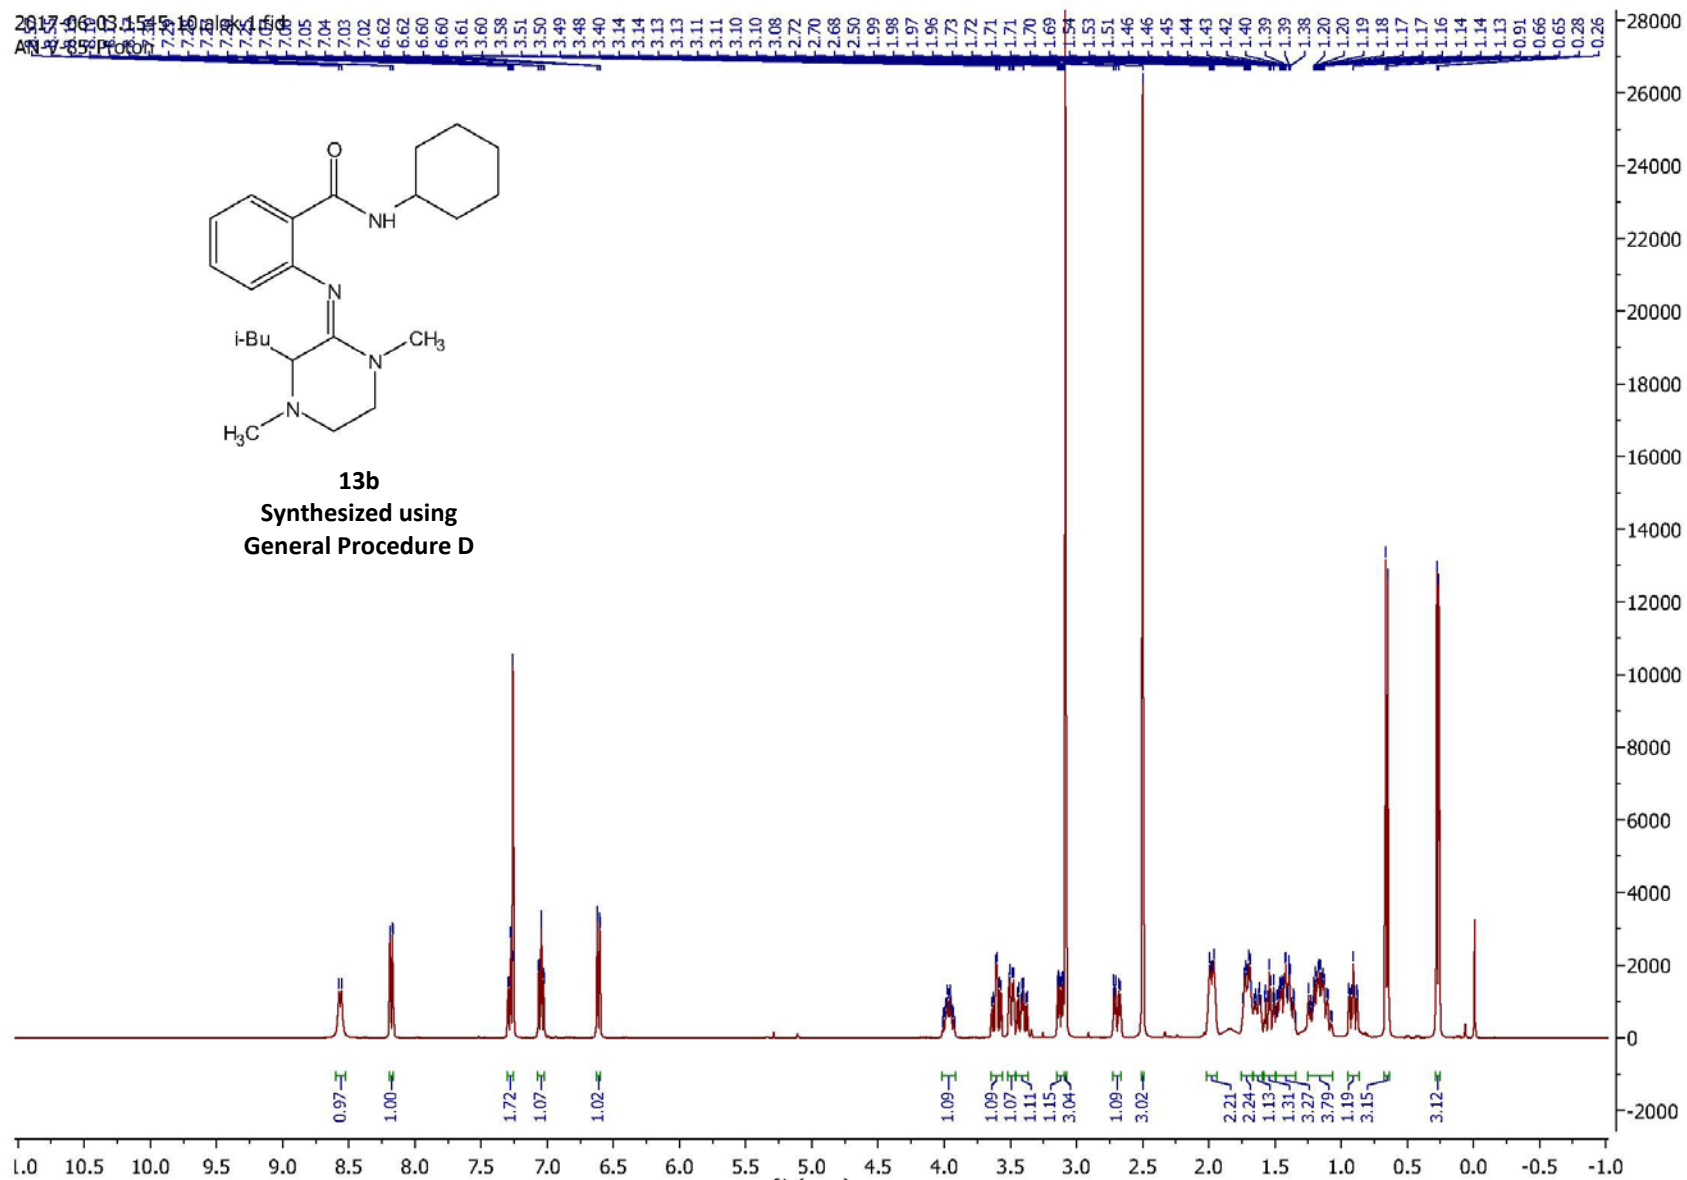

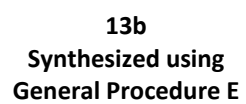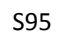

2017-06-03.1545-10.alok.2.fid  
AN-V-85-Carbon

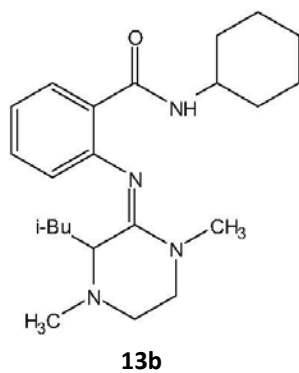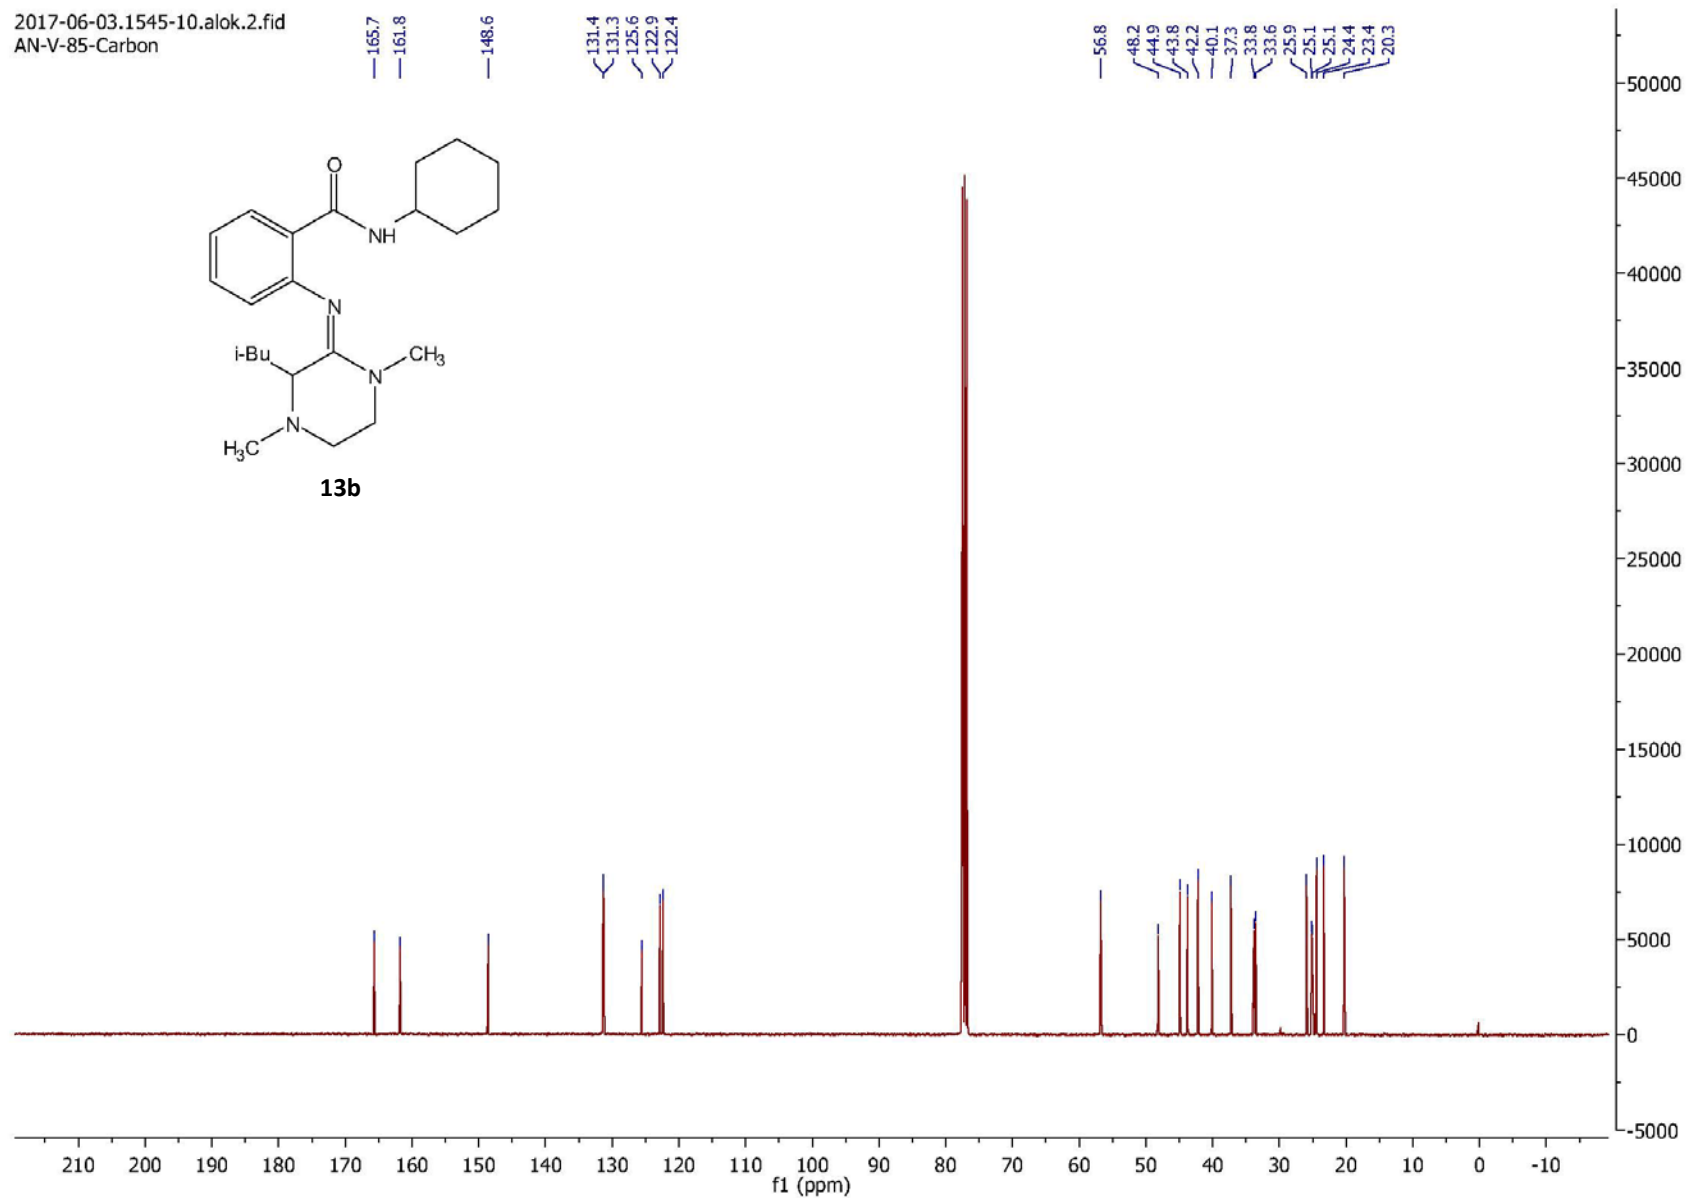

PROTON  
20170703.AN-V-143

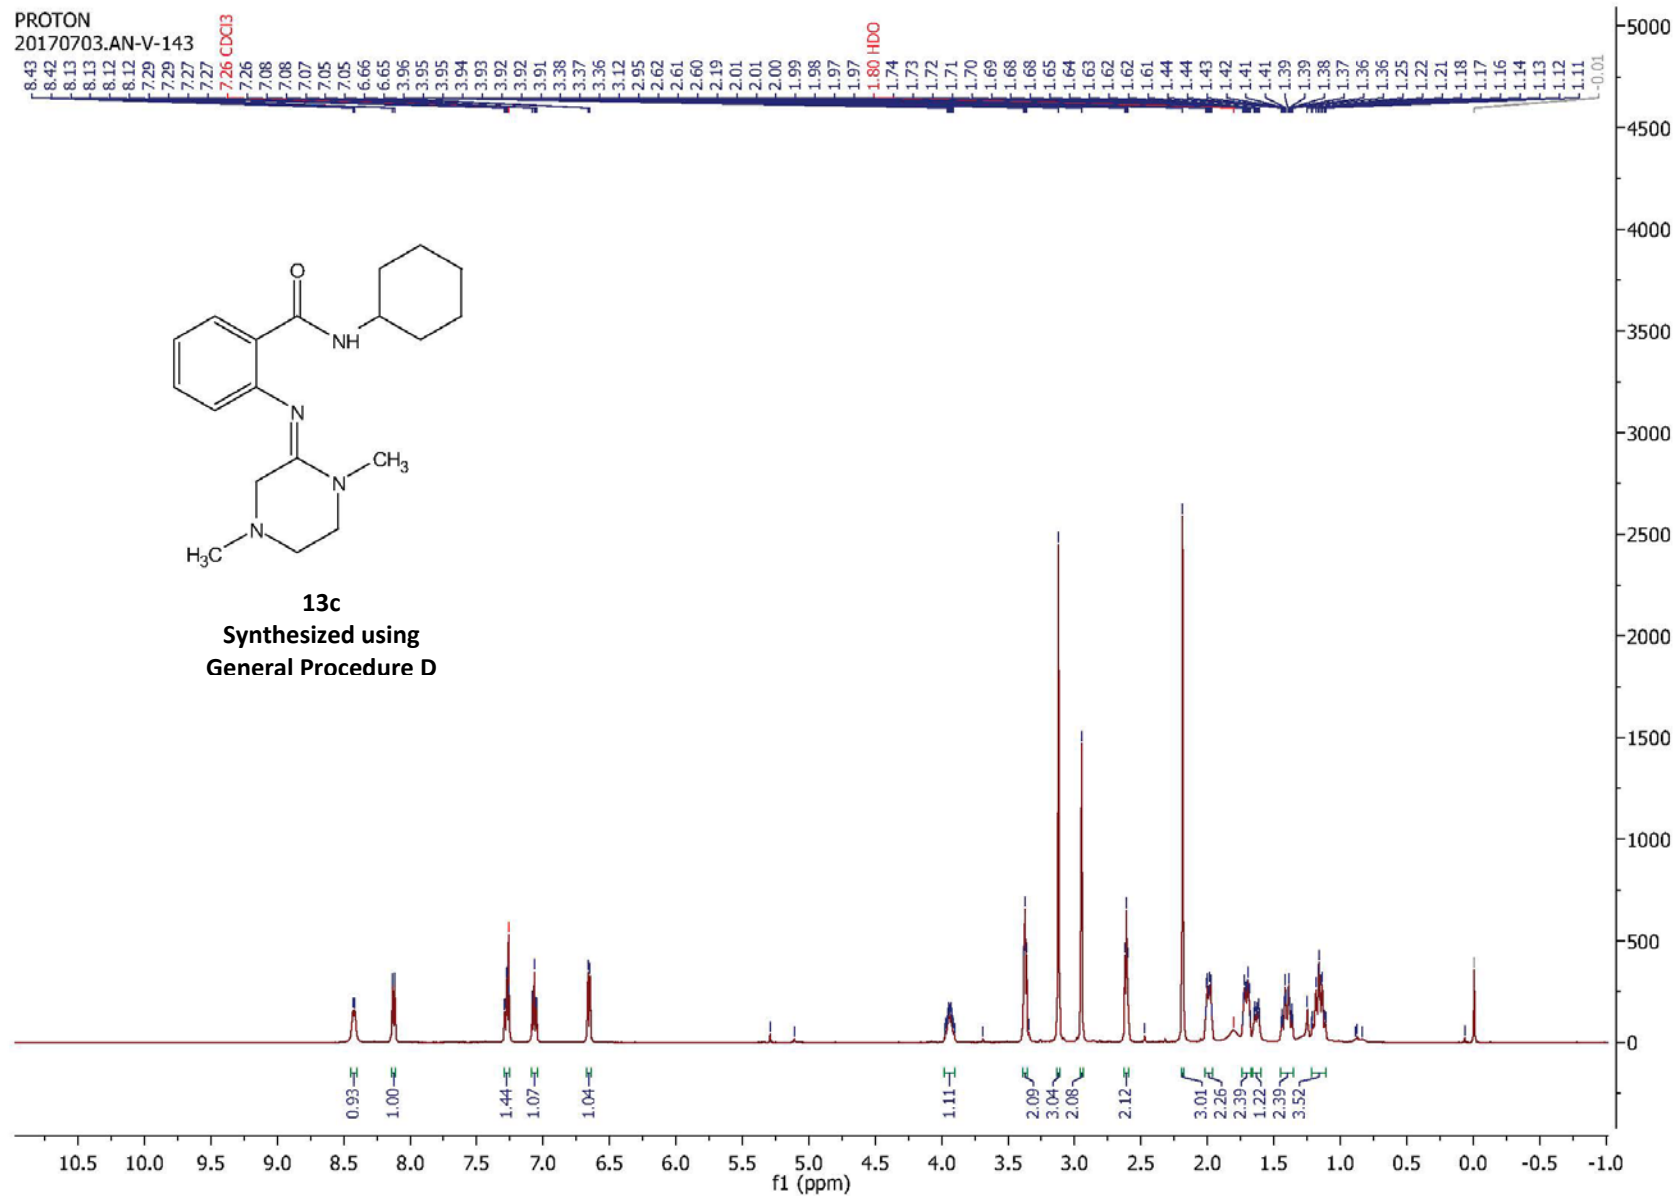

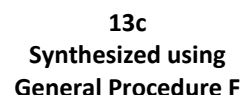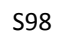

CARBON  
20170703.AN-V-143

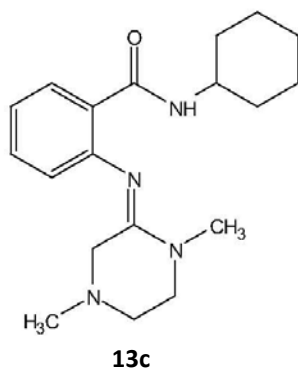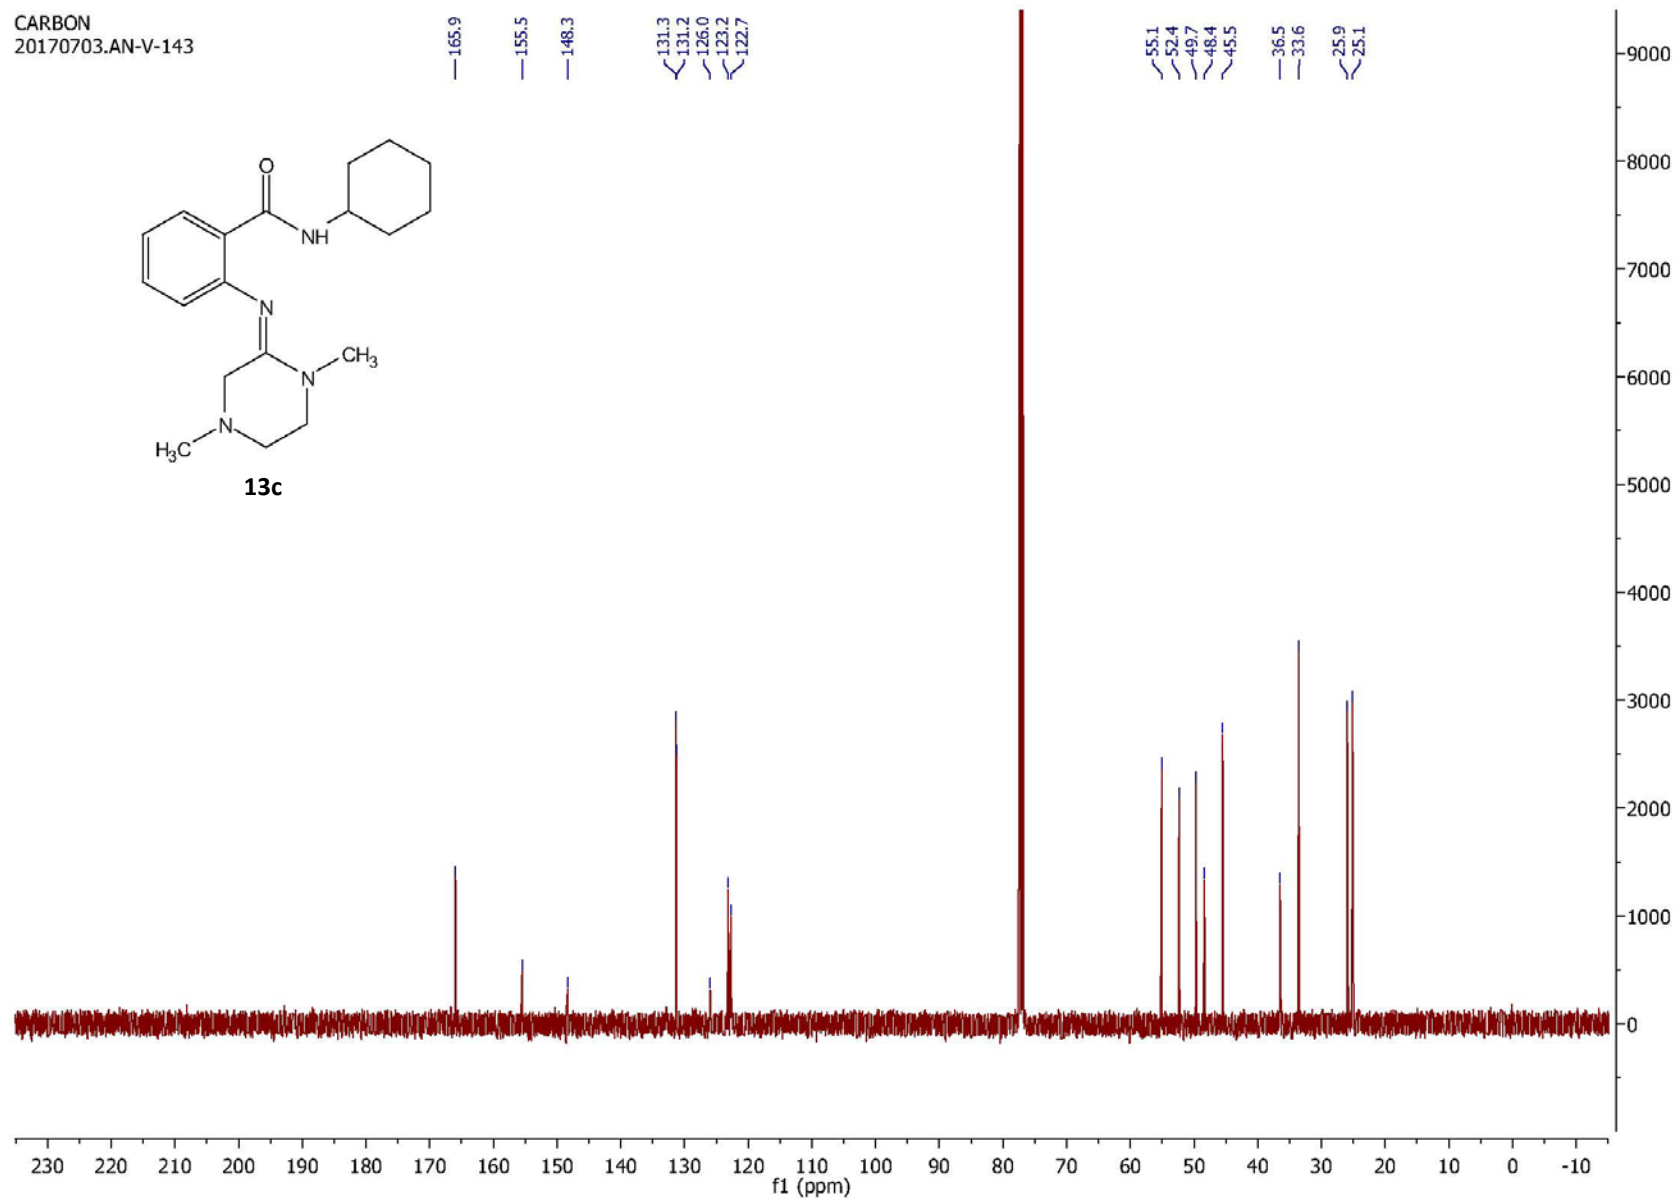

2017-08-17.2042-45.alok.1.fid  
AN-V-199-Rearrangement-Proton

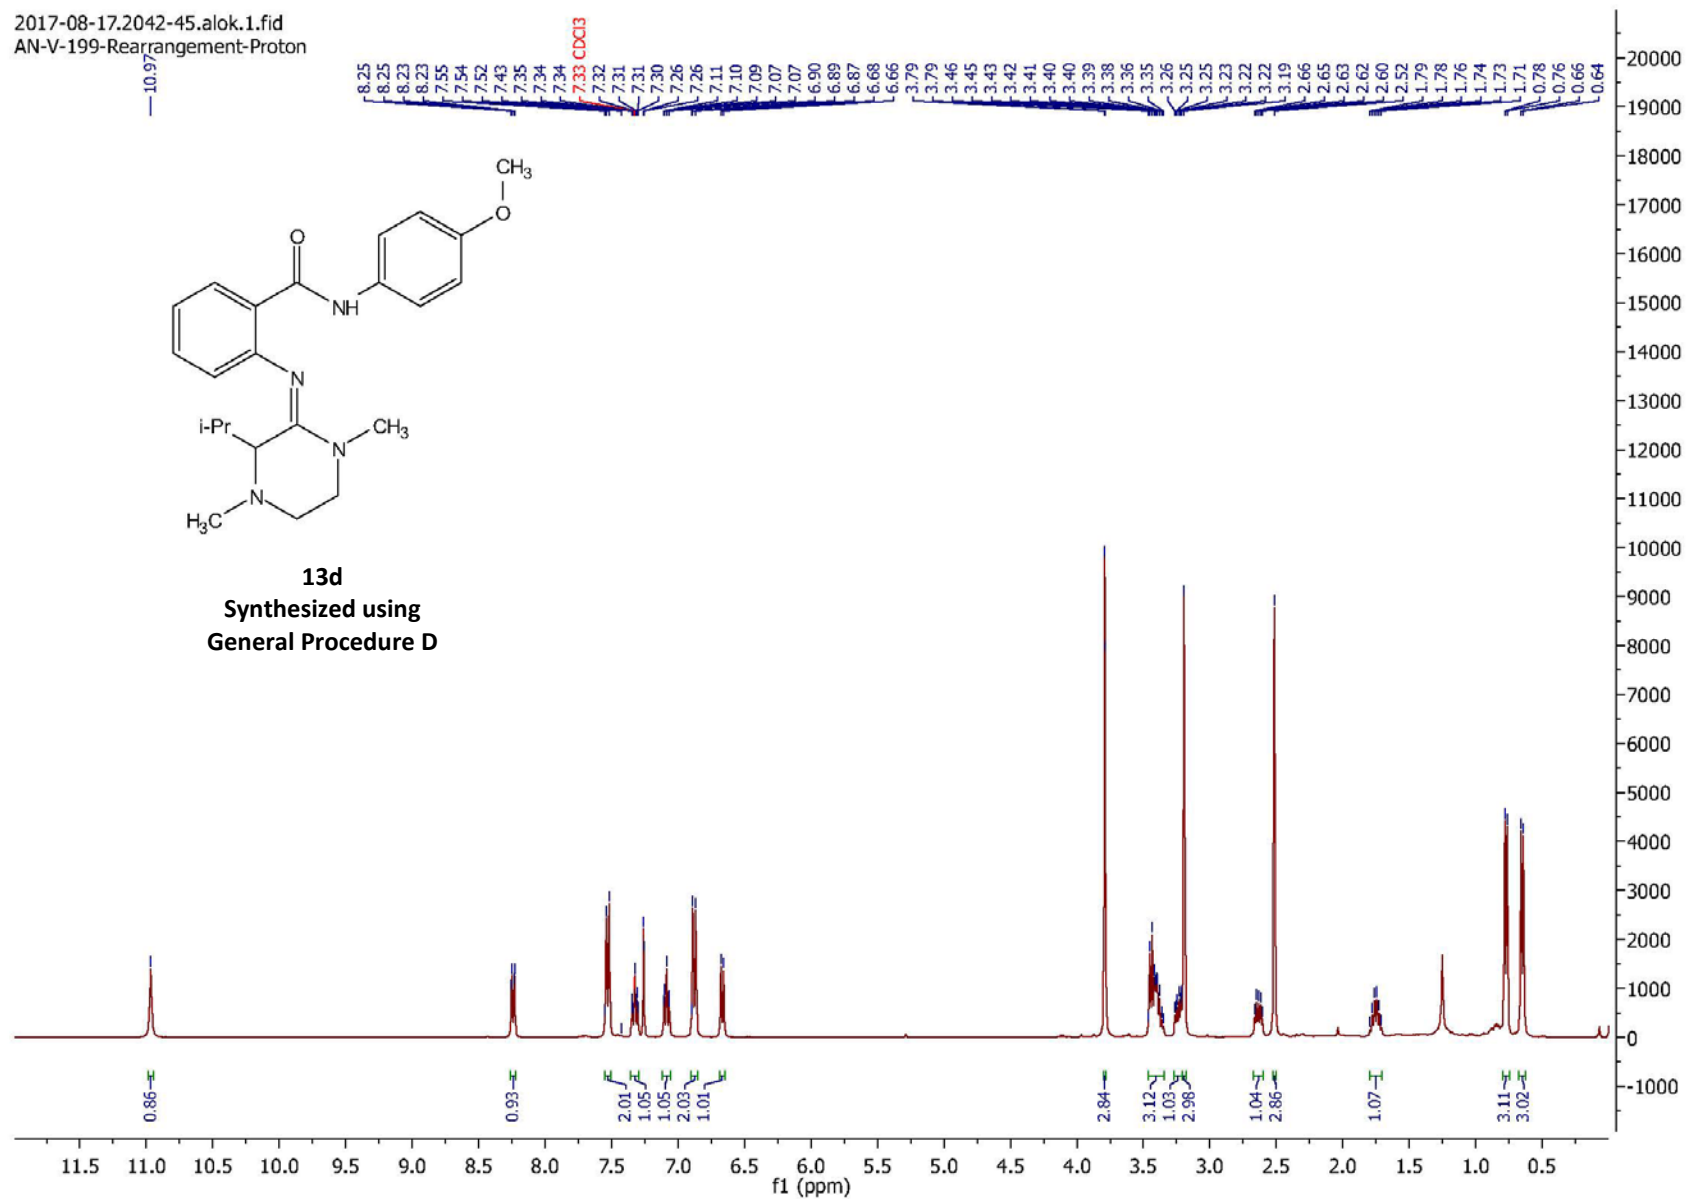



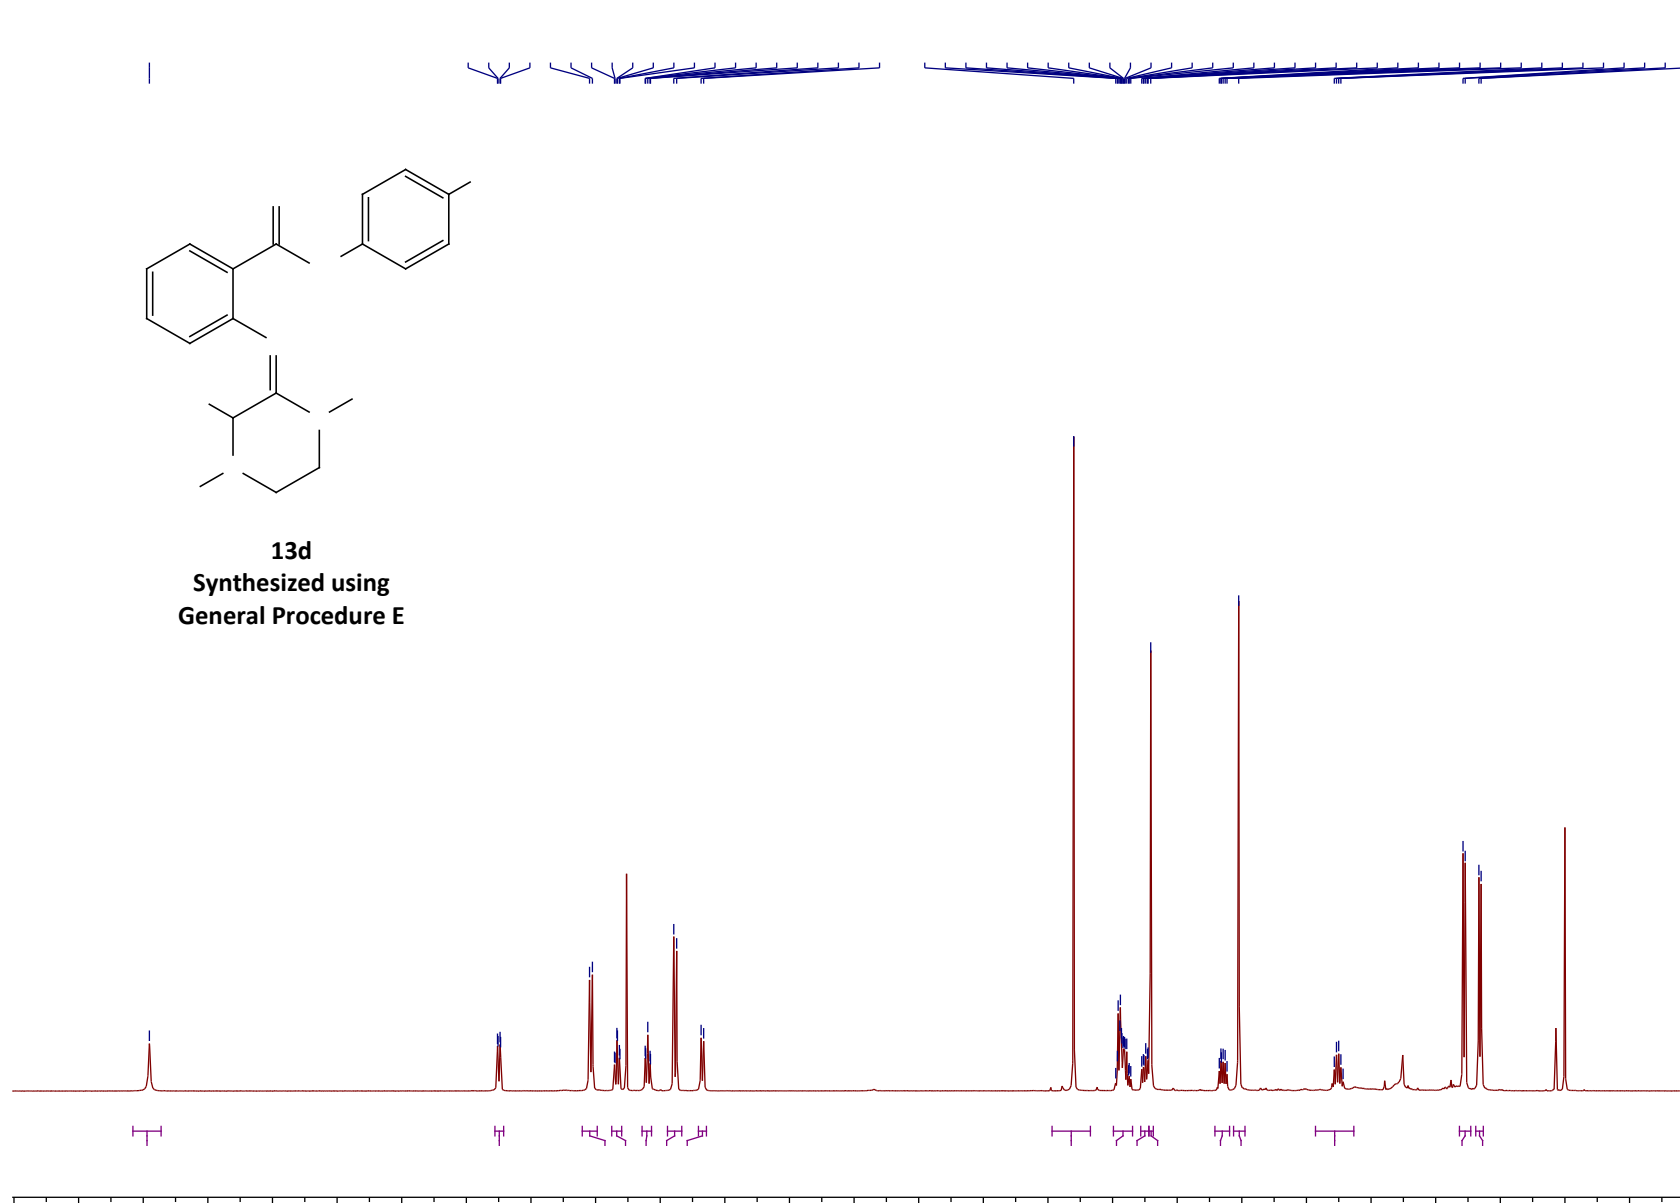

2017-08-17 2042-45 alk.2.fid  
AN-V-199-Rearrangement-Carbon

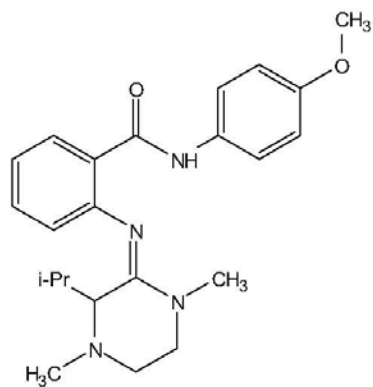

**13d**

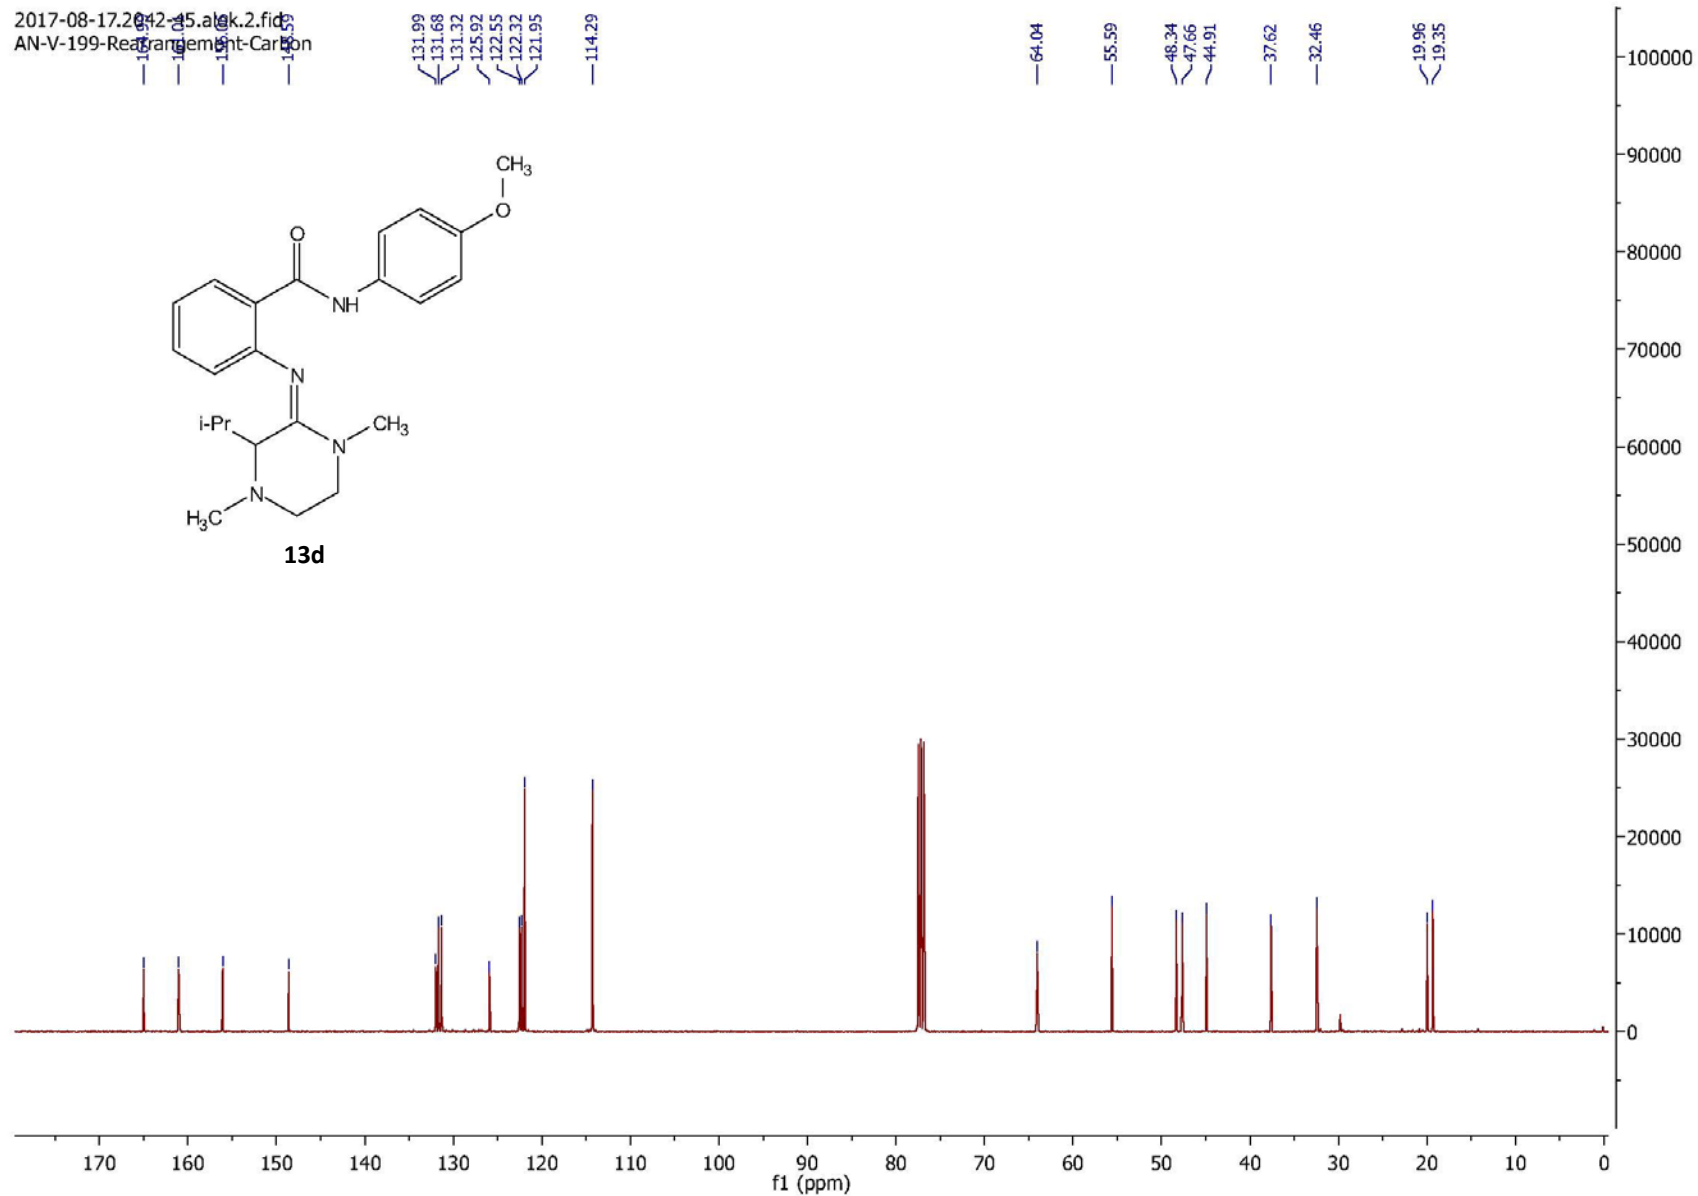

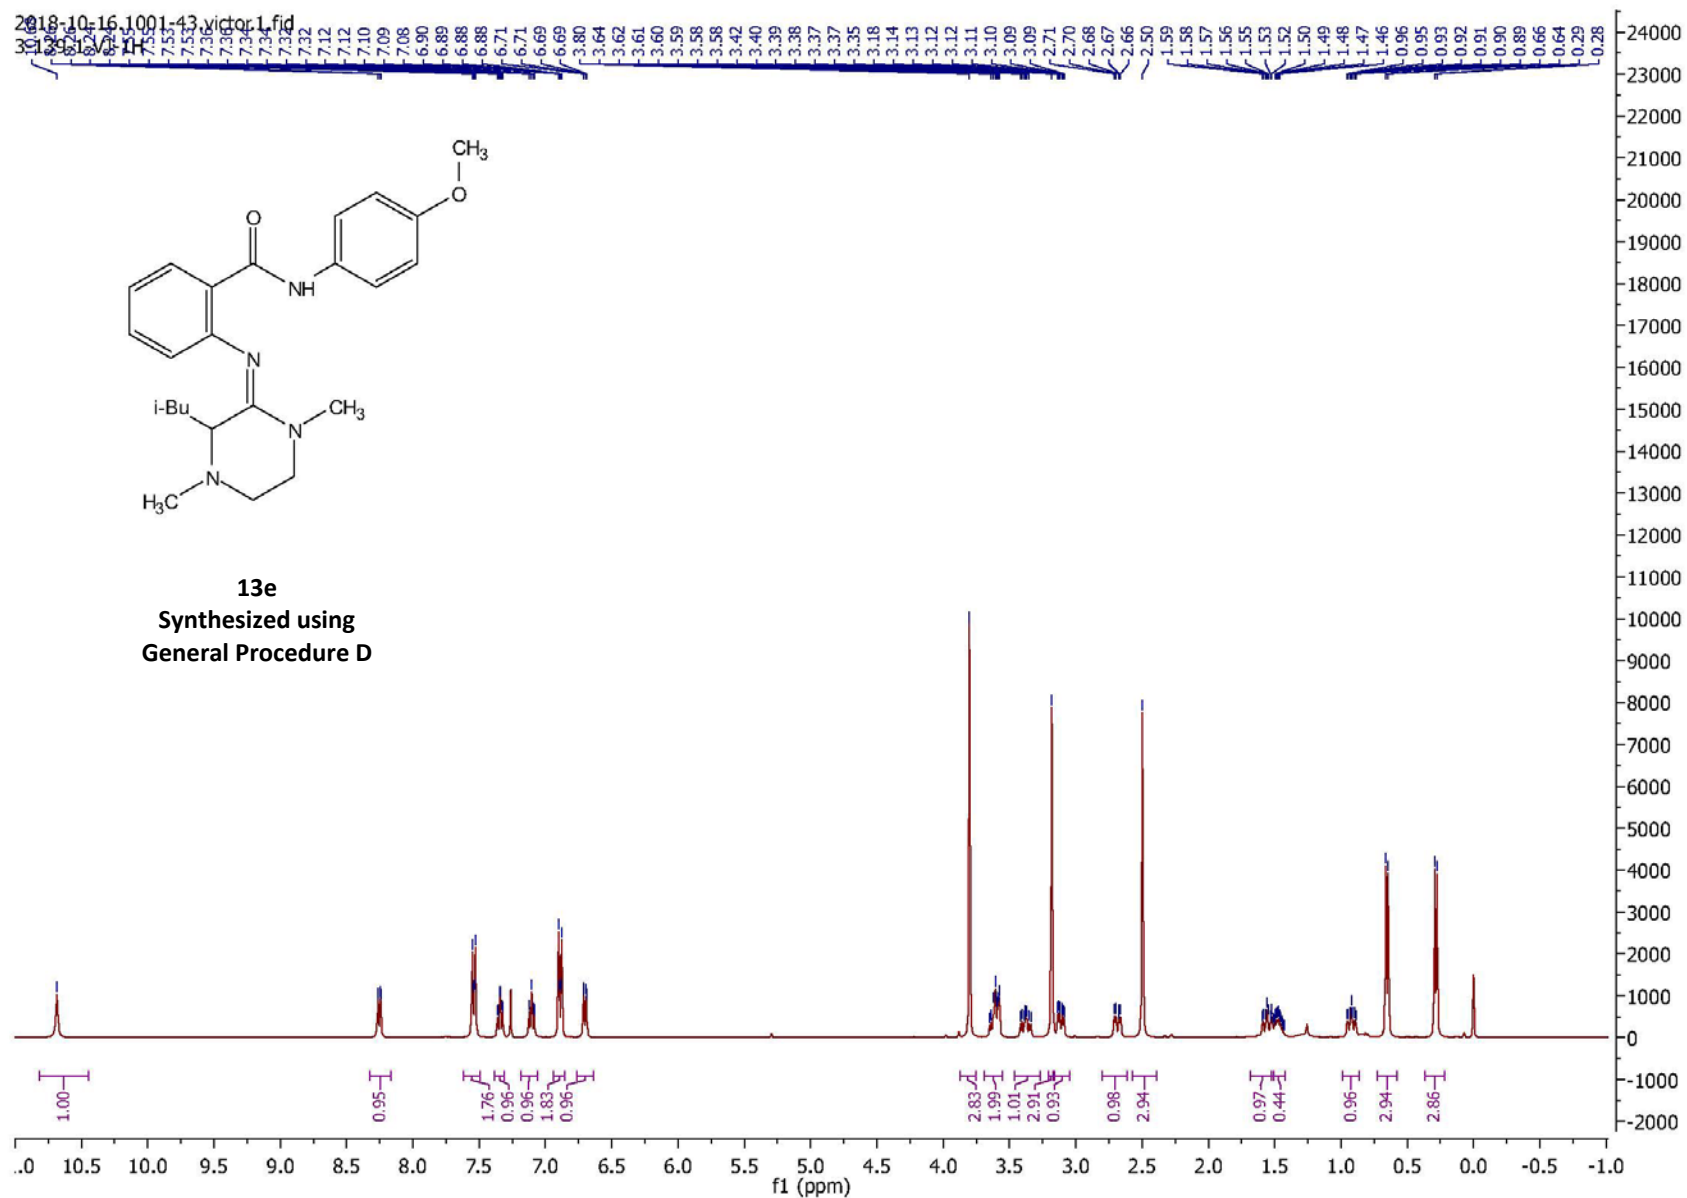

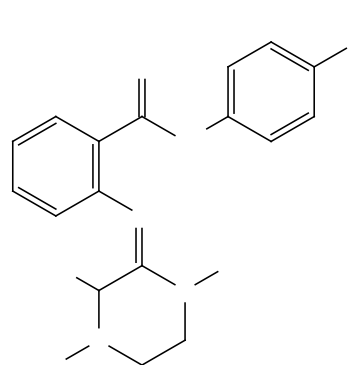

**13e**  
Synthesized using  
General Procedure E

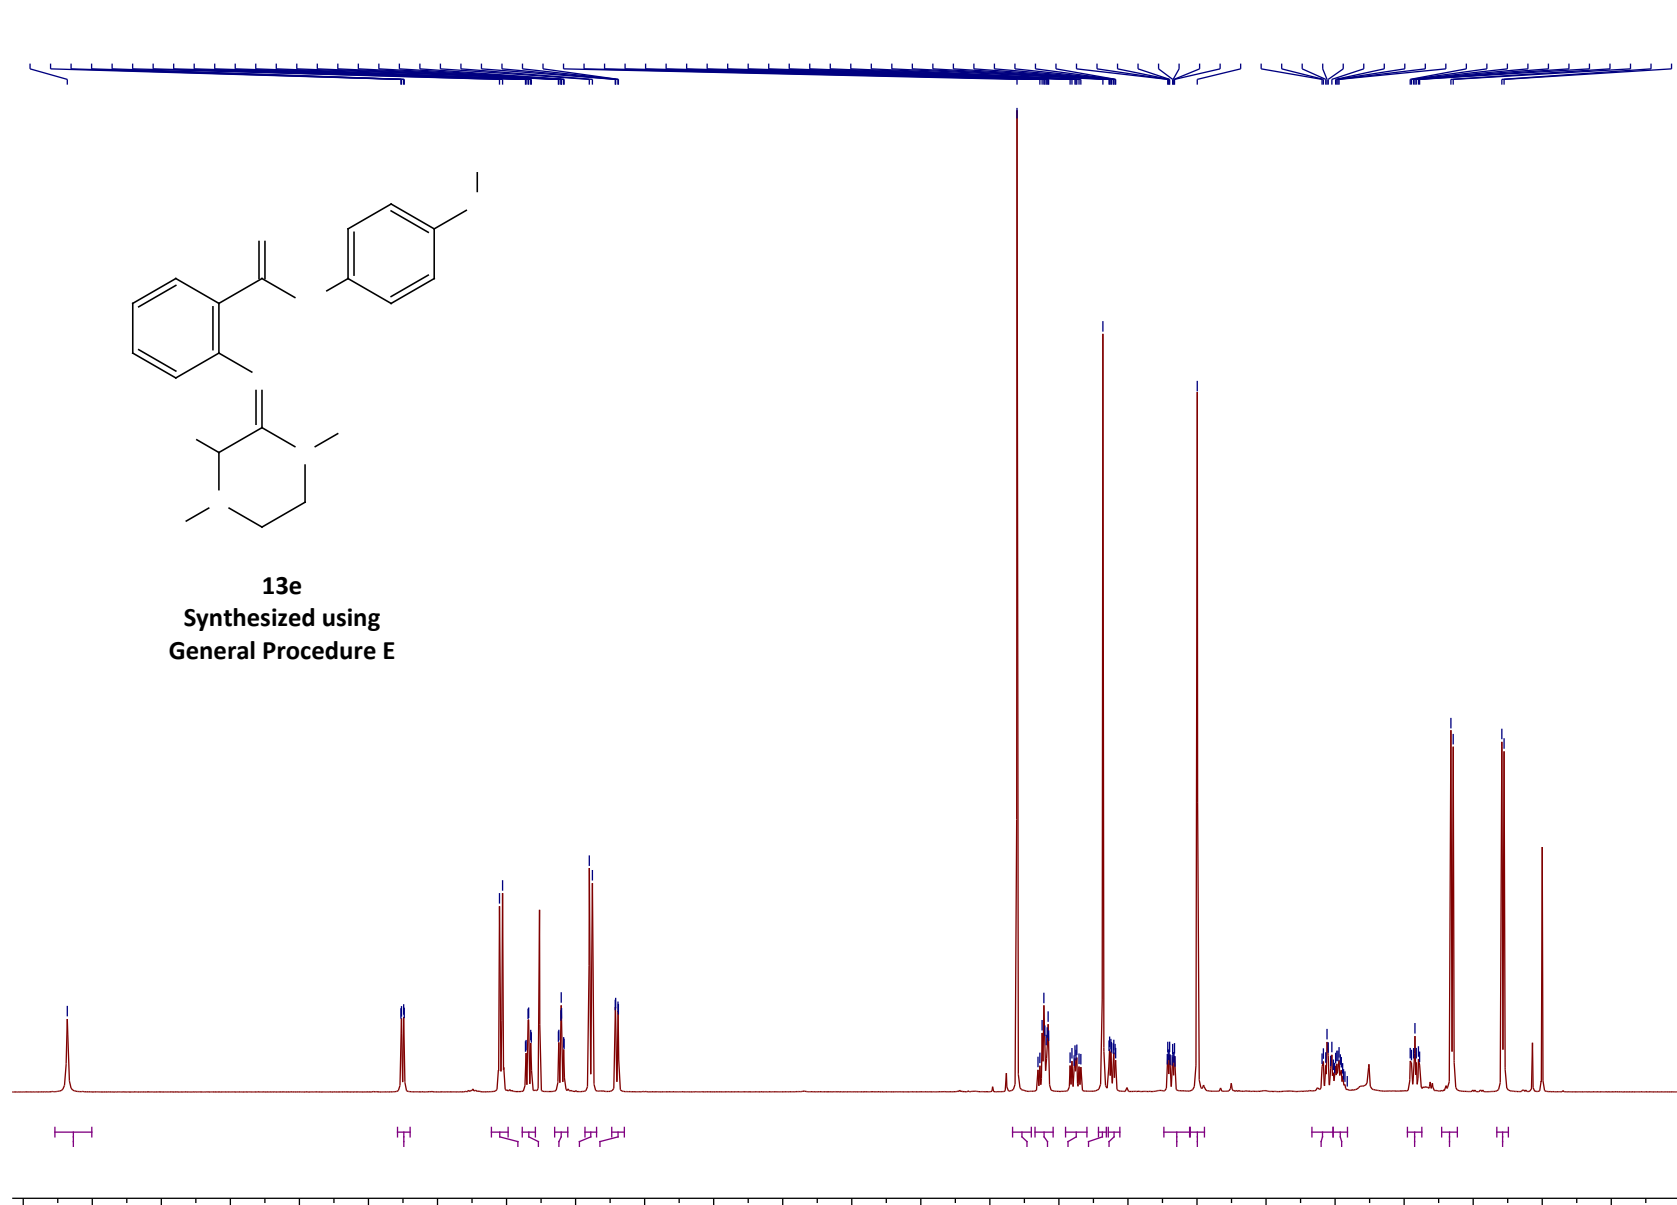

2018-10-16.1001-43.victor.2.fid  
3-139-1-VJ-1H

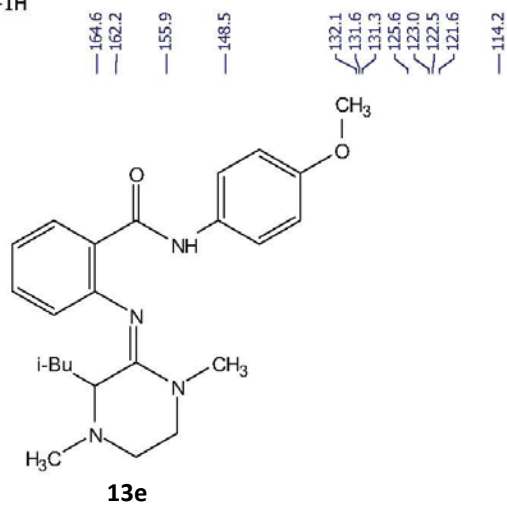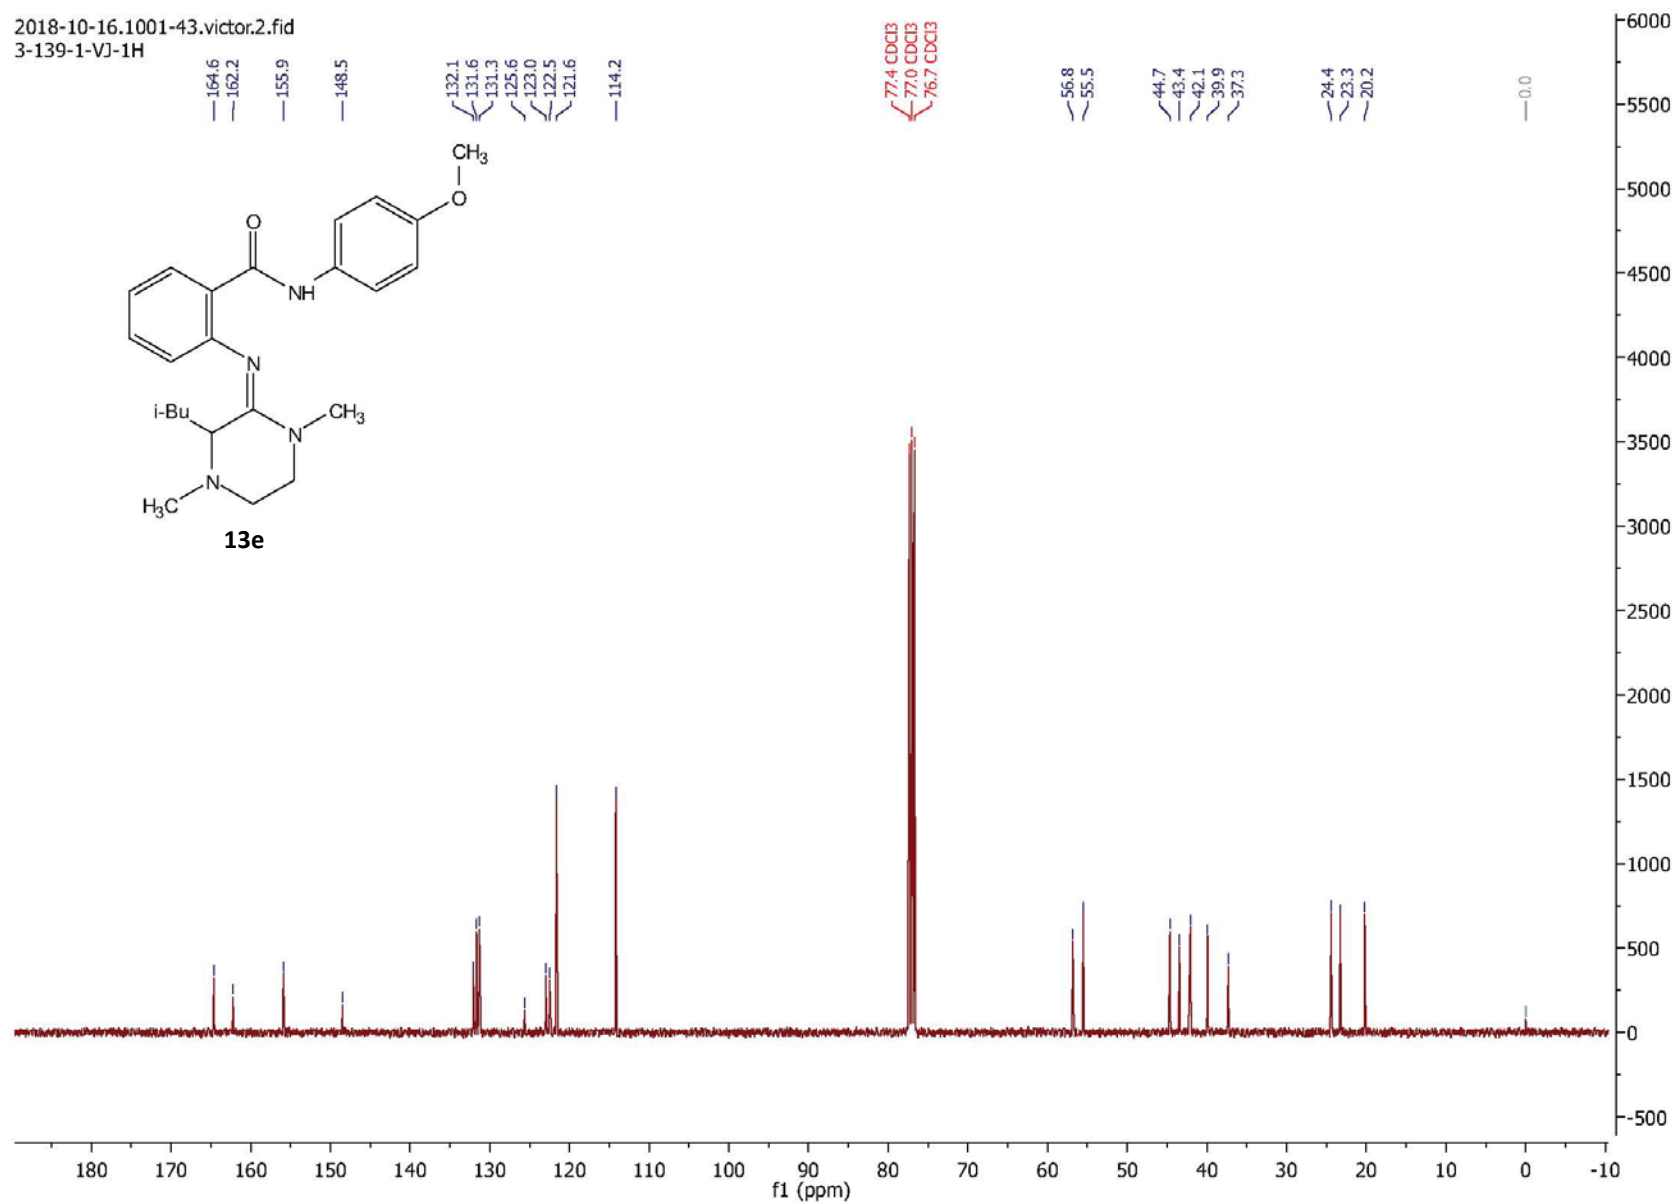

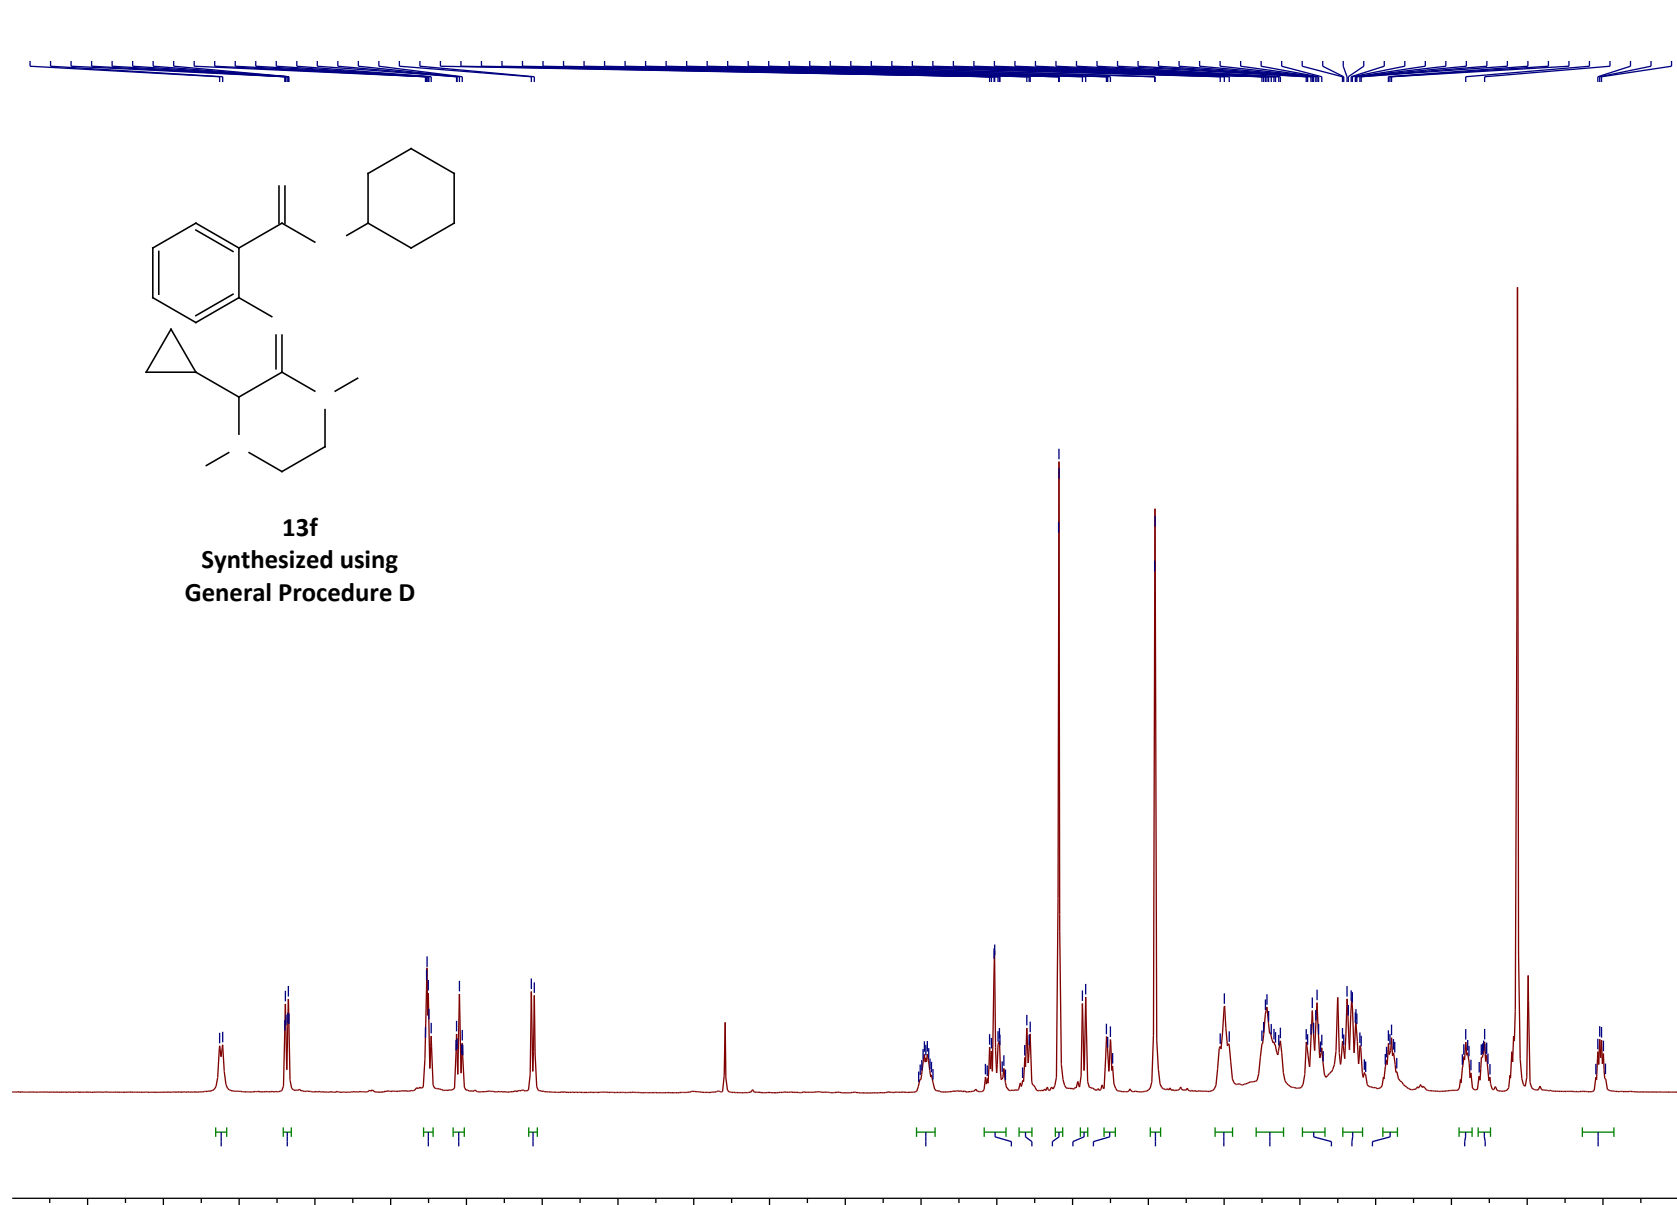

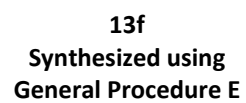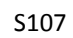

2017-09-24.1842-55.alok.2.fid  
AN-V-037-Carbon

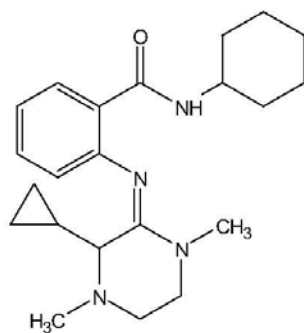

**13f**

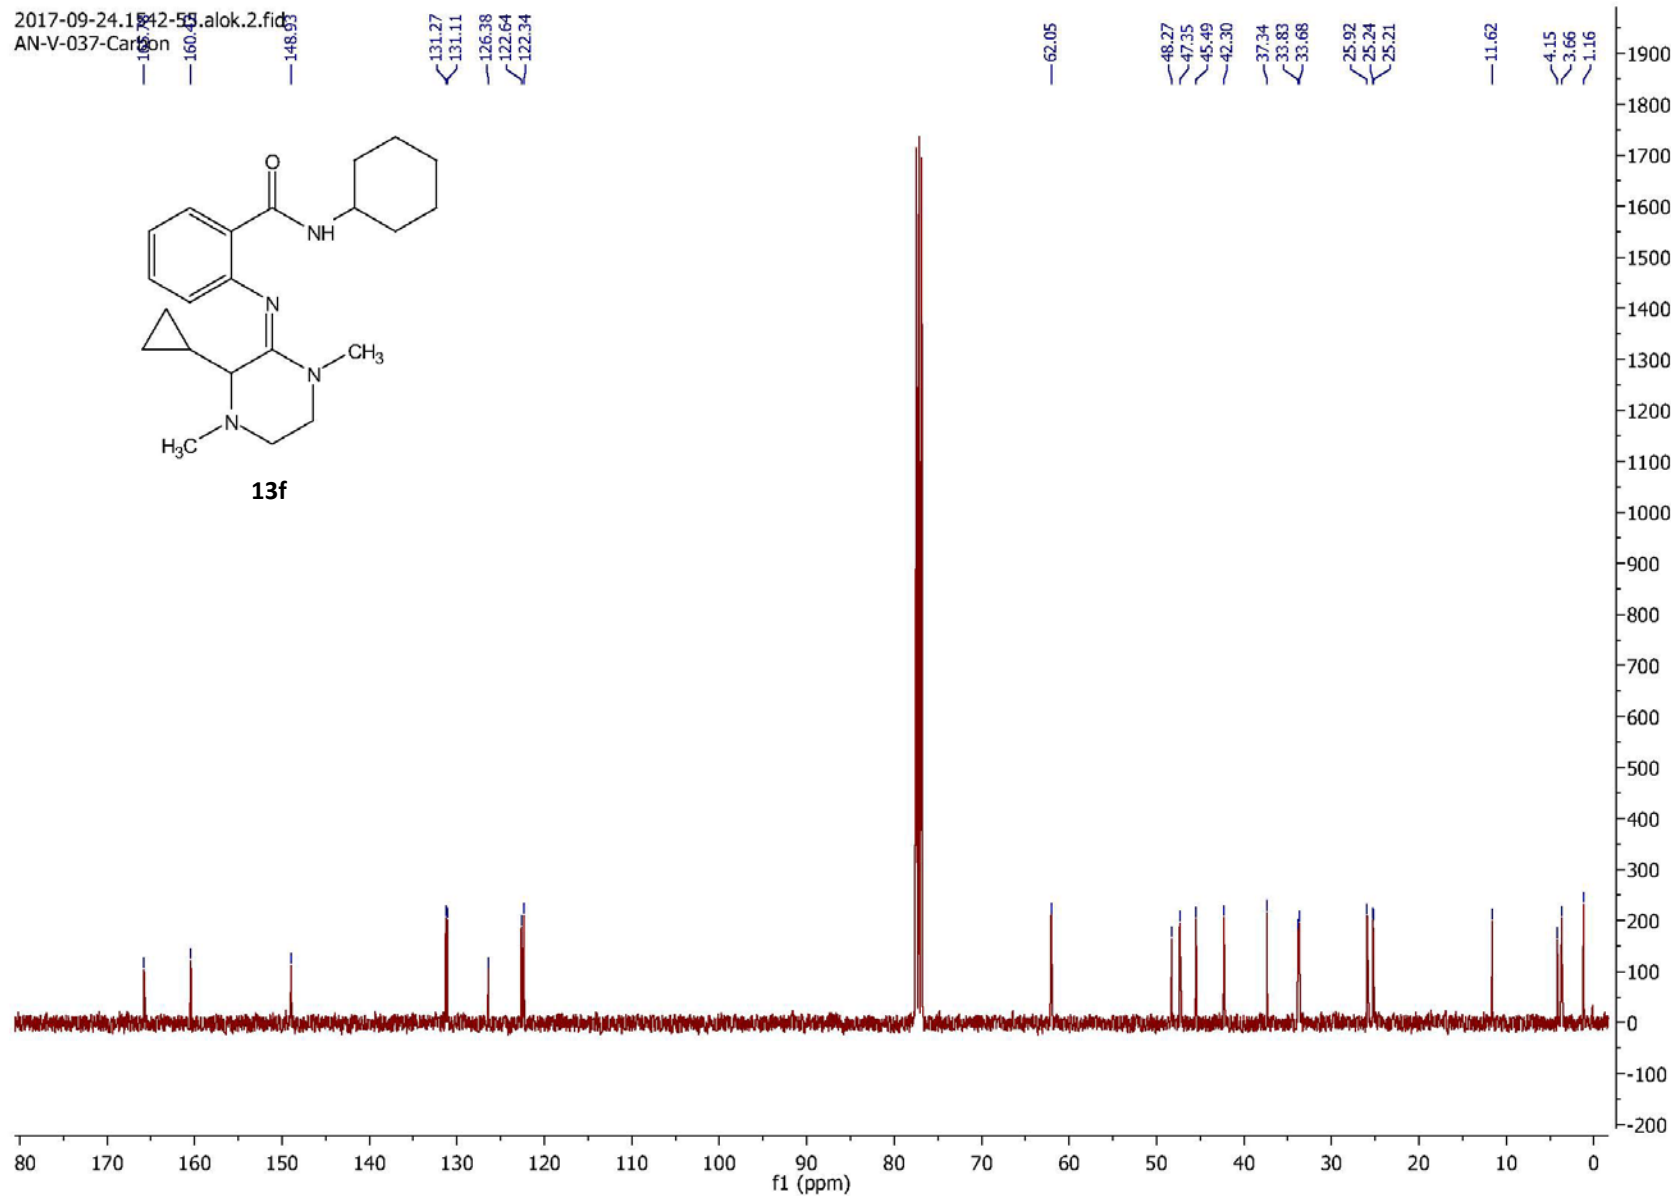



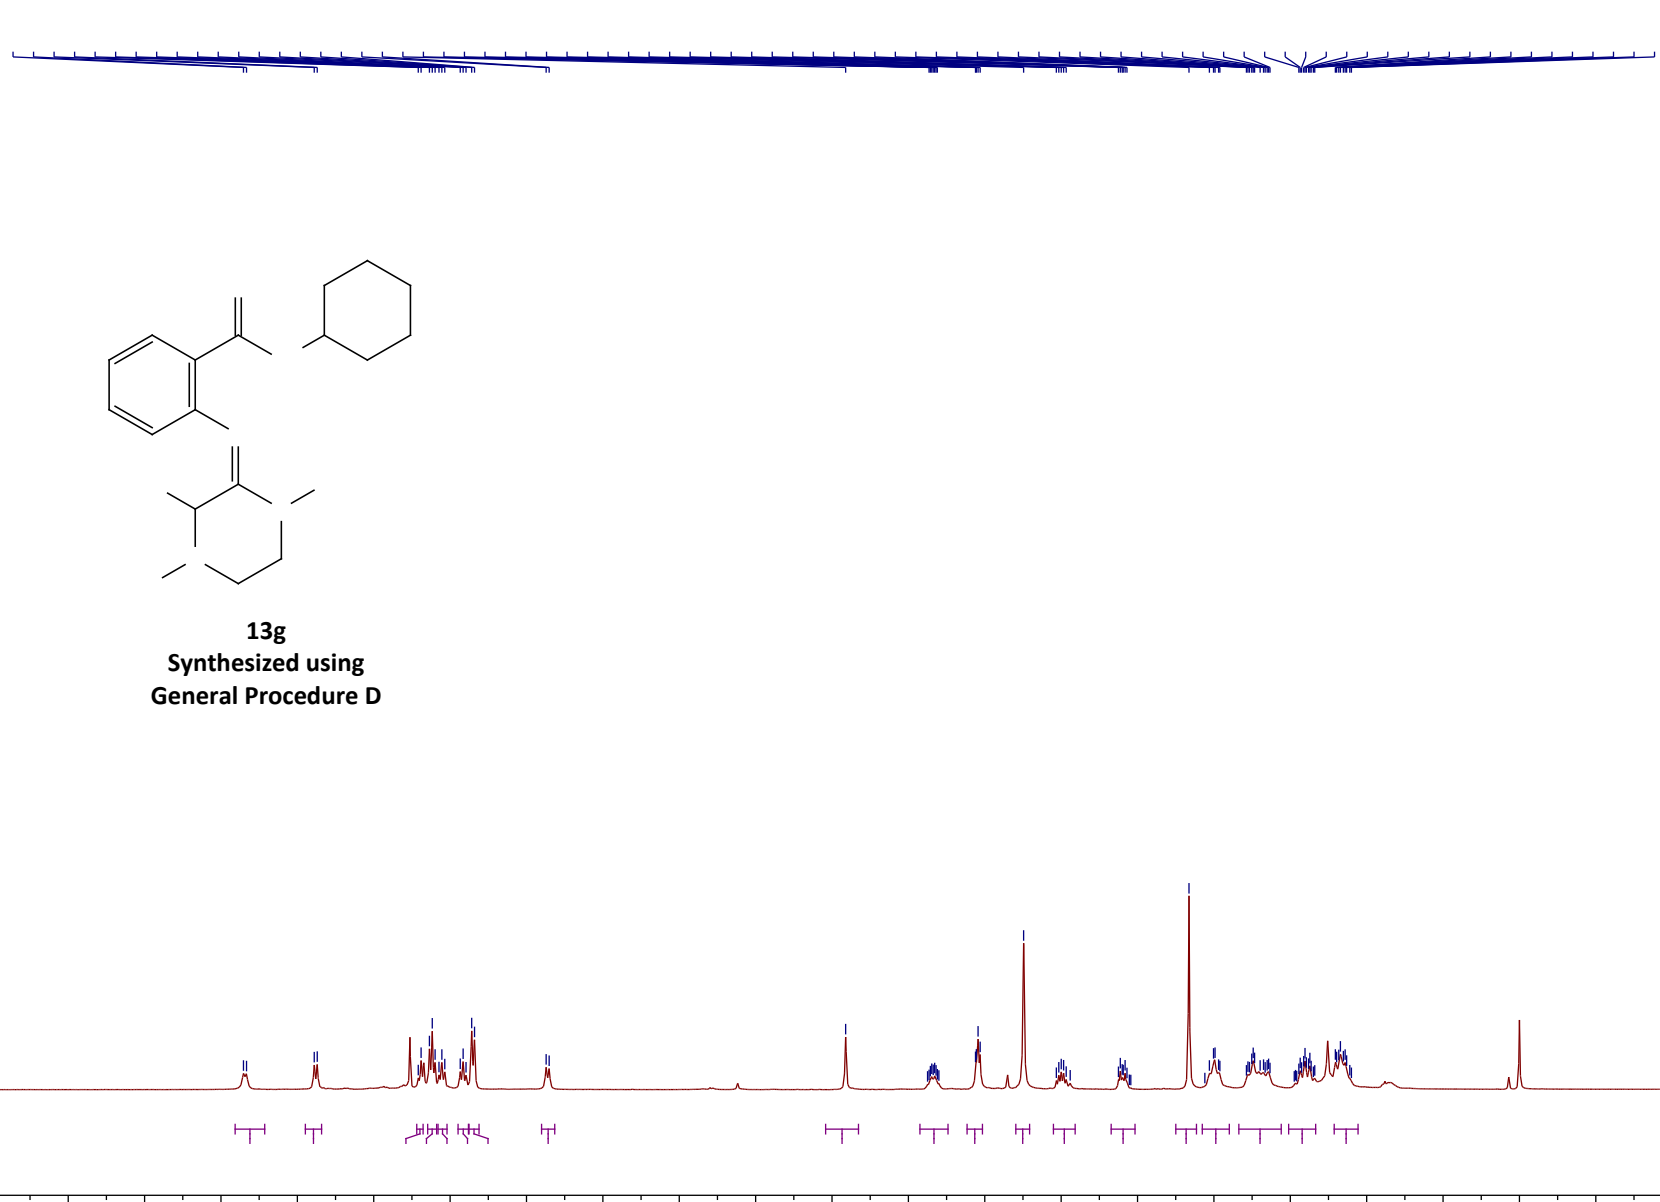

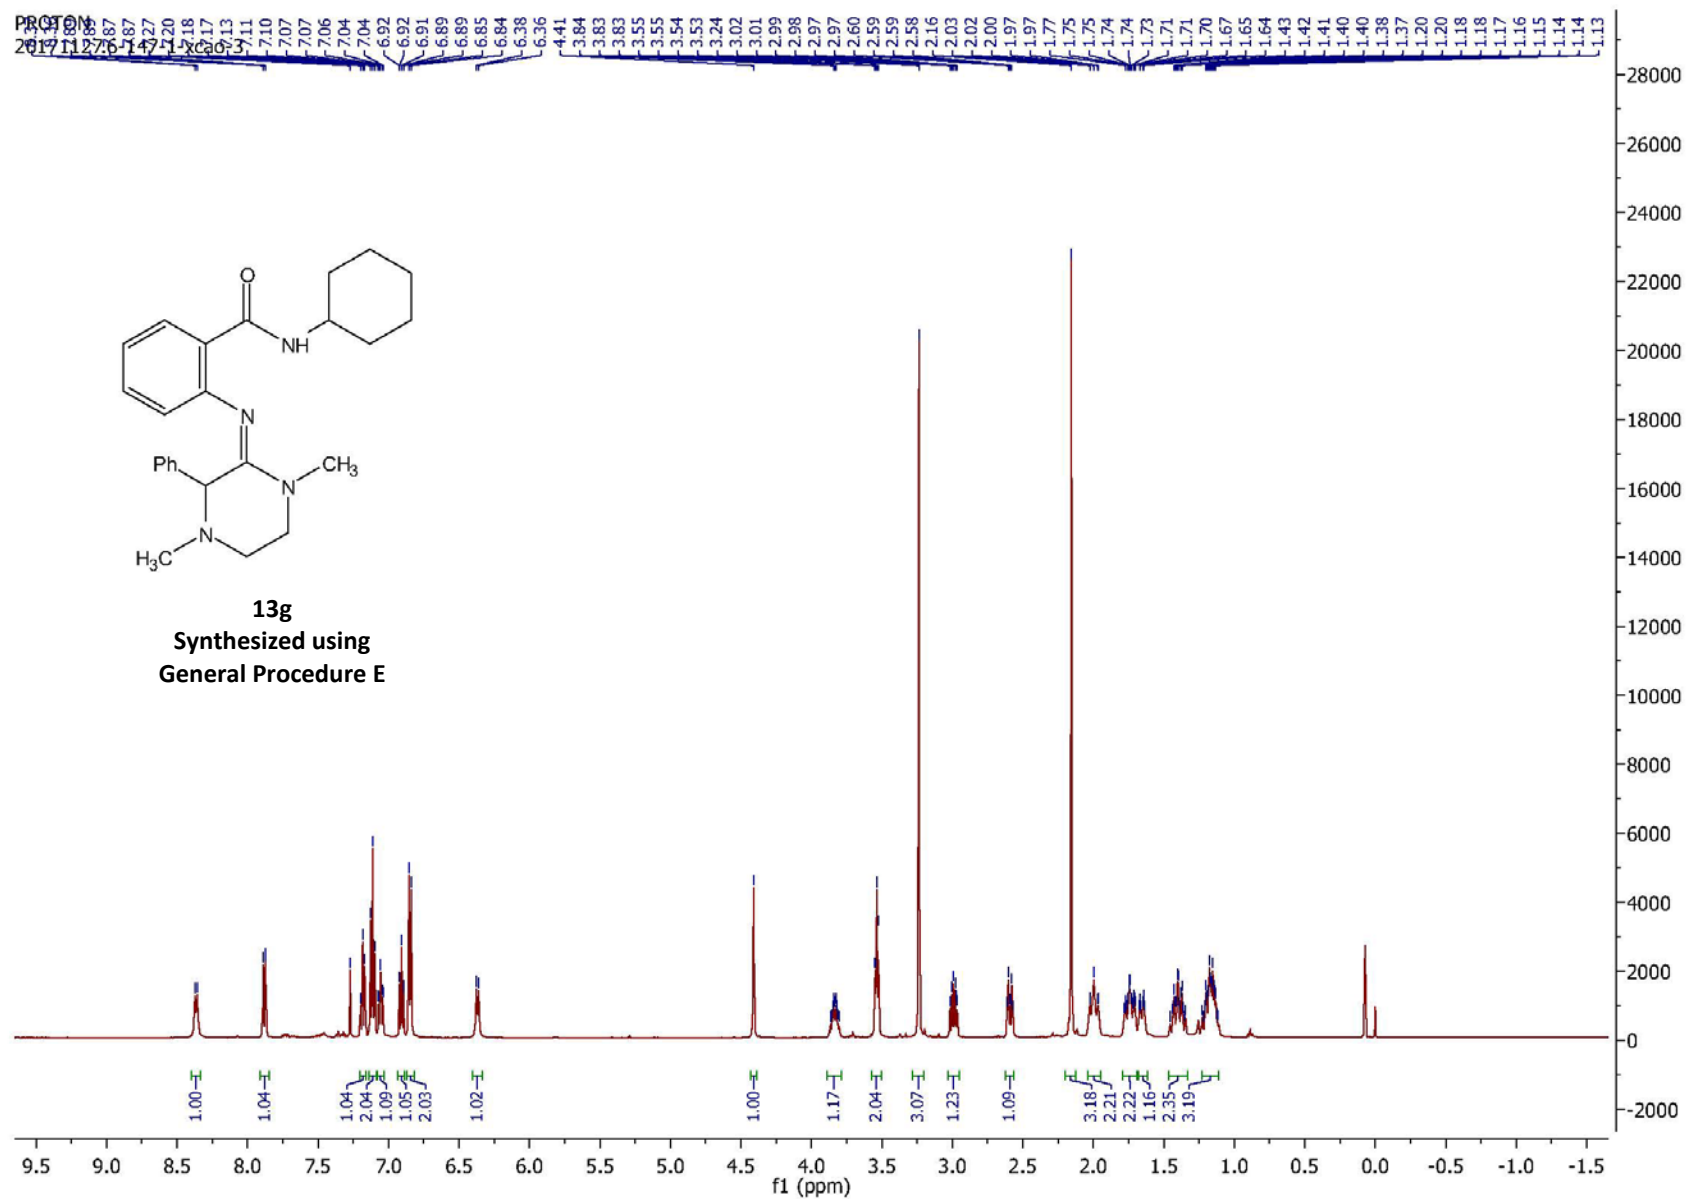

CARBON 1  
20180605.6-147-1-xcao-3

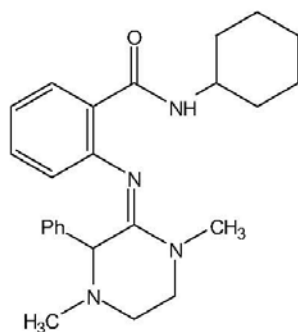

**13g**

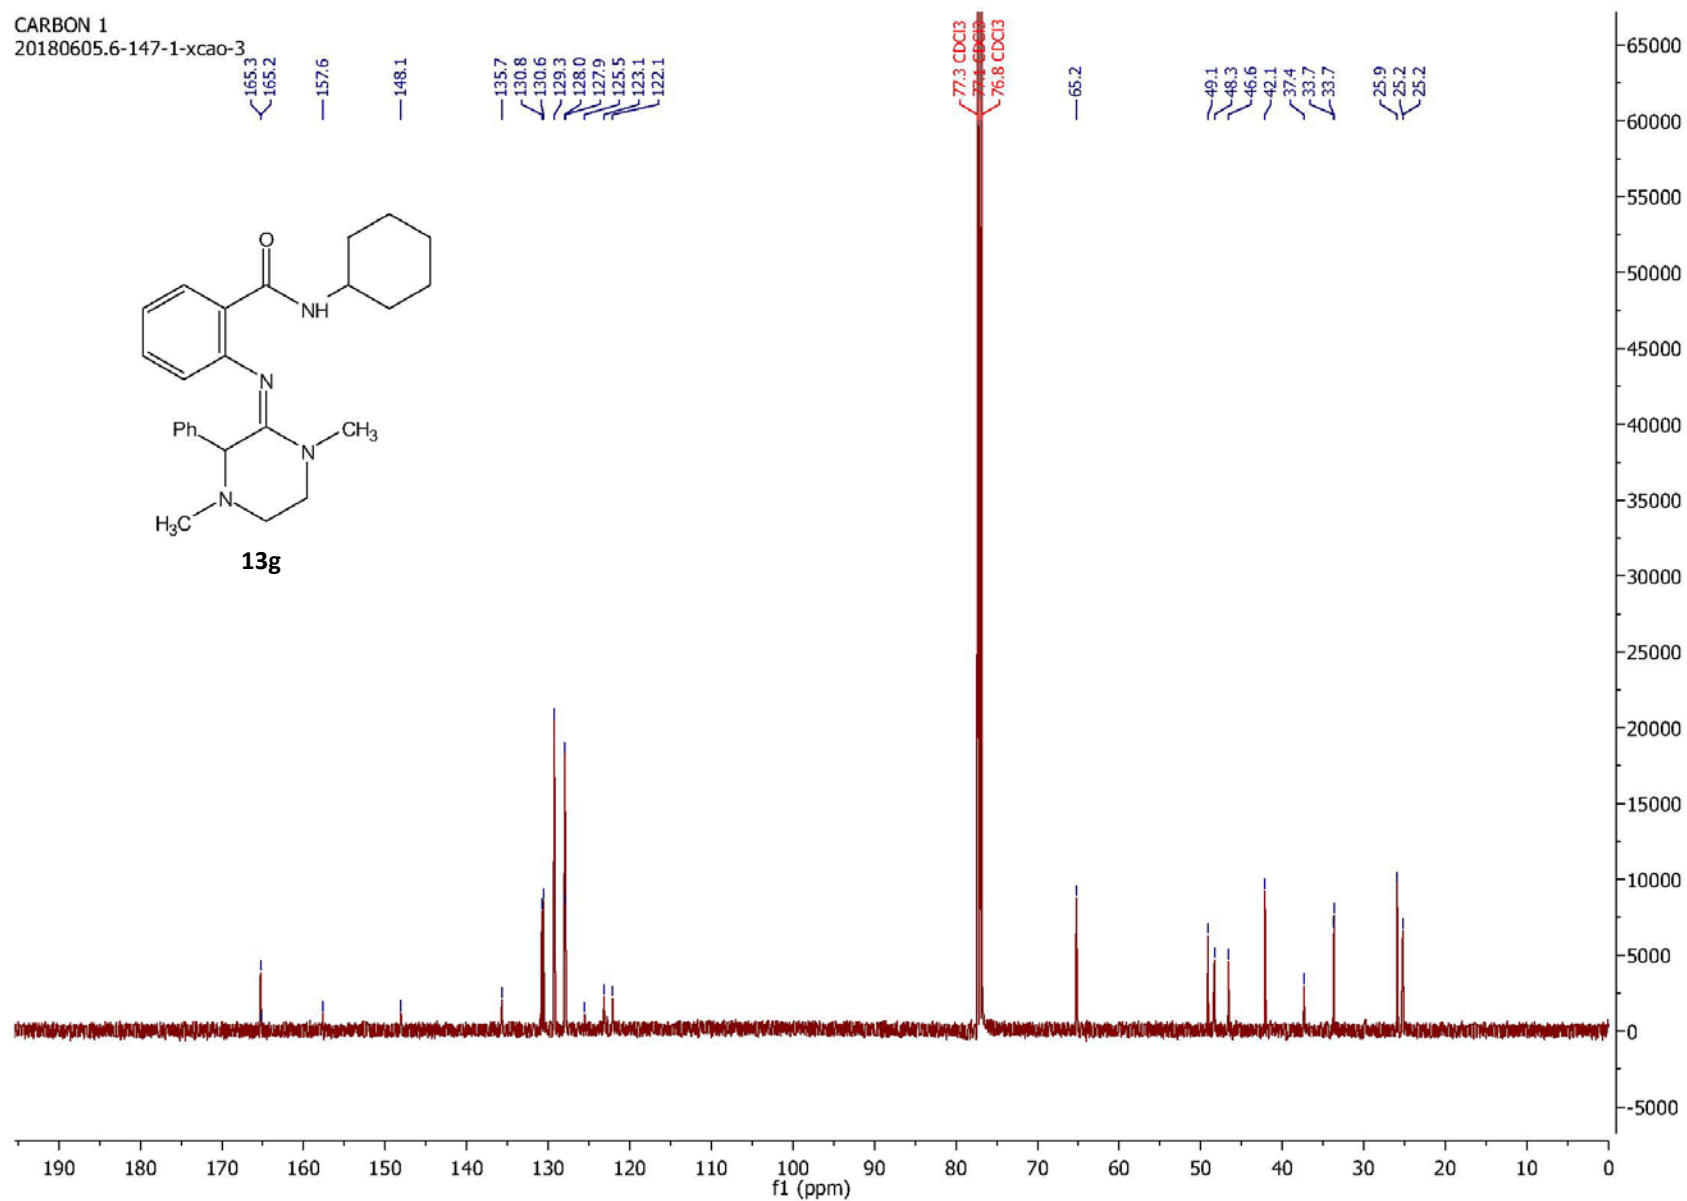

PROTON  
20170501.AN-V-

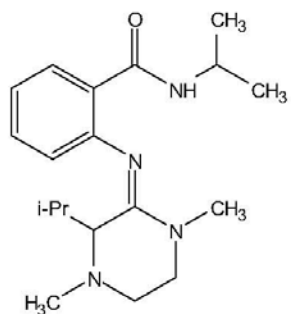

**13h**  
Synthesized using  
General Procedure D

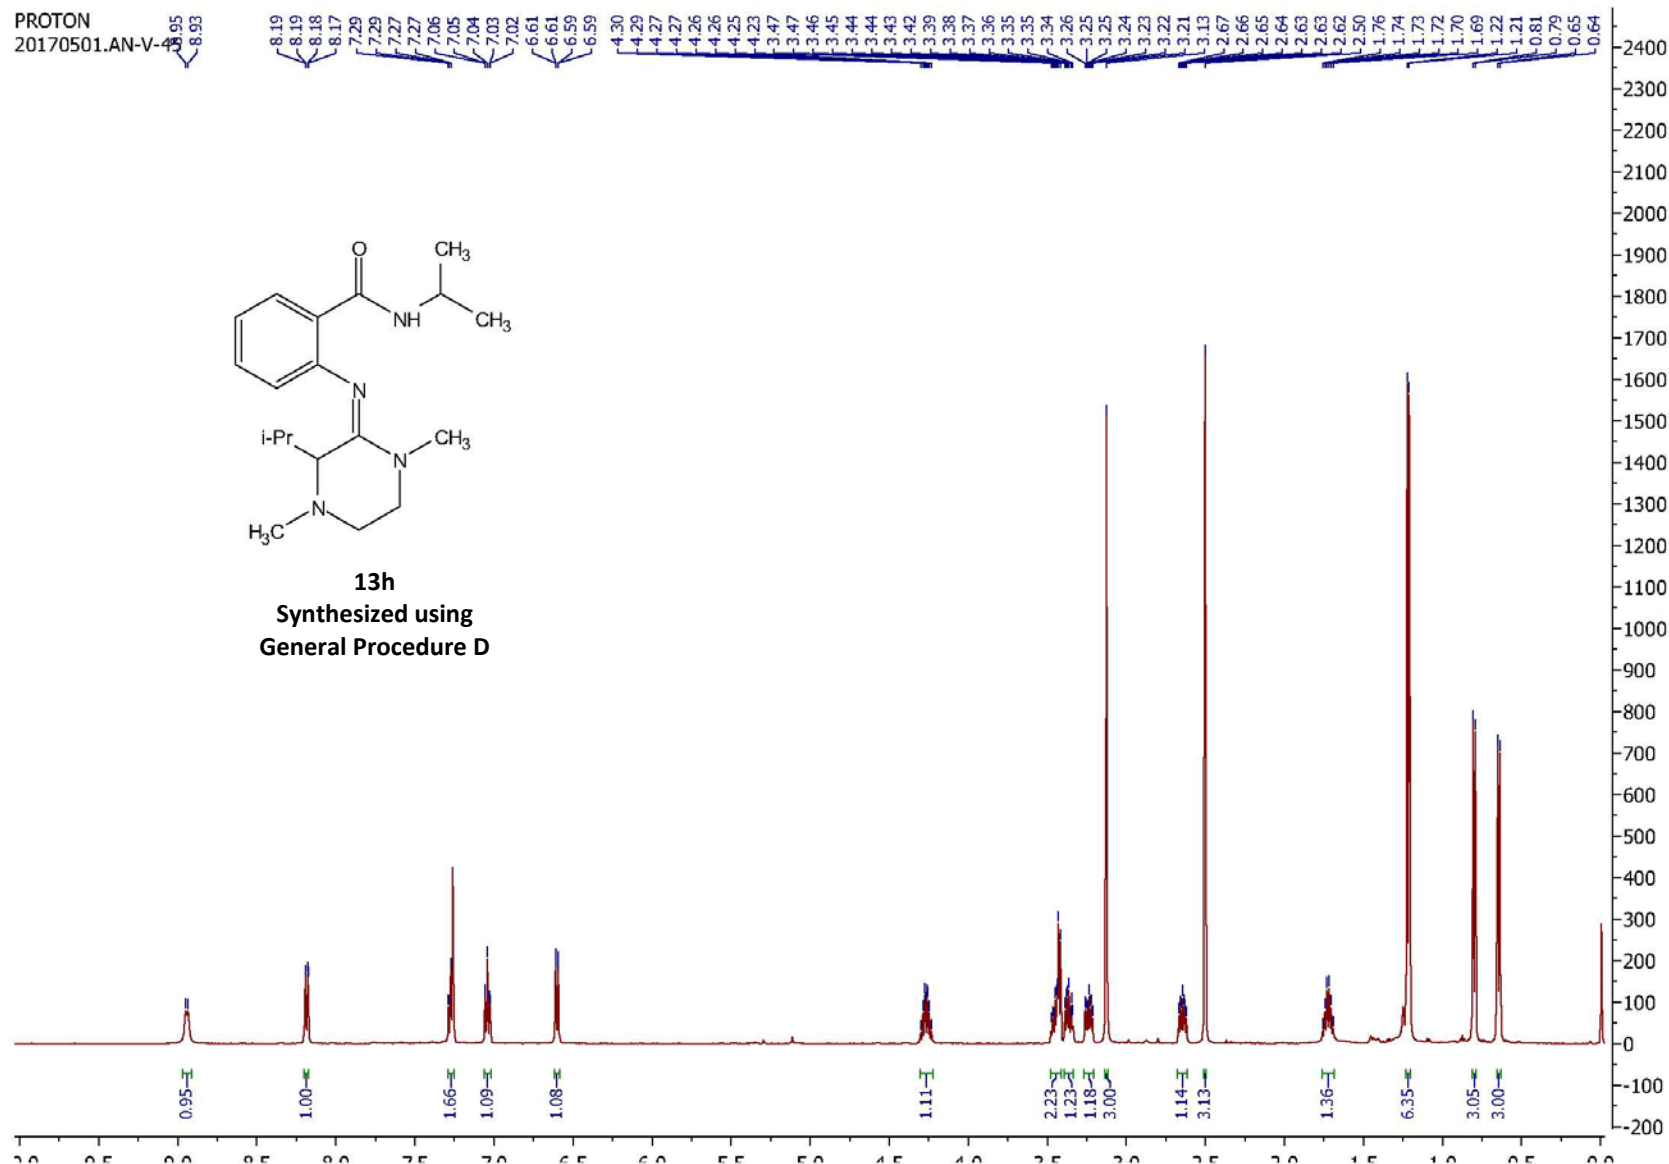

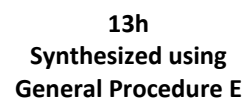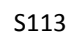

CARBON

20170501.A08-V-450 C13

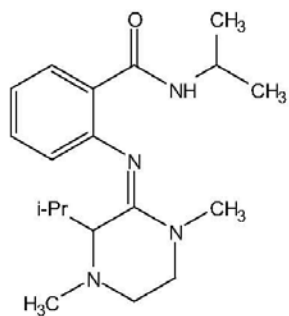

**13h**

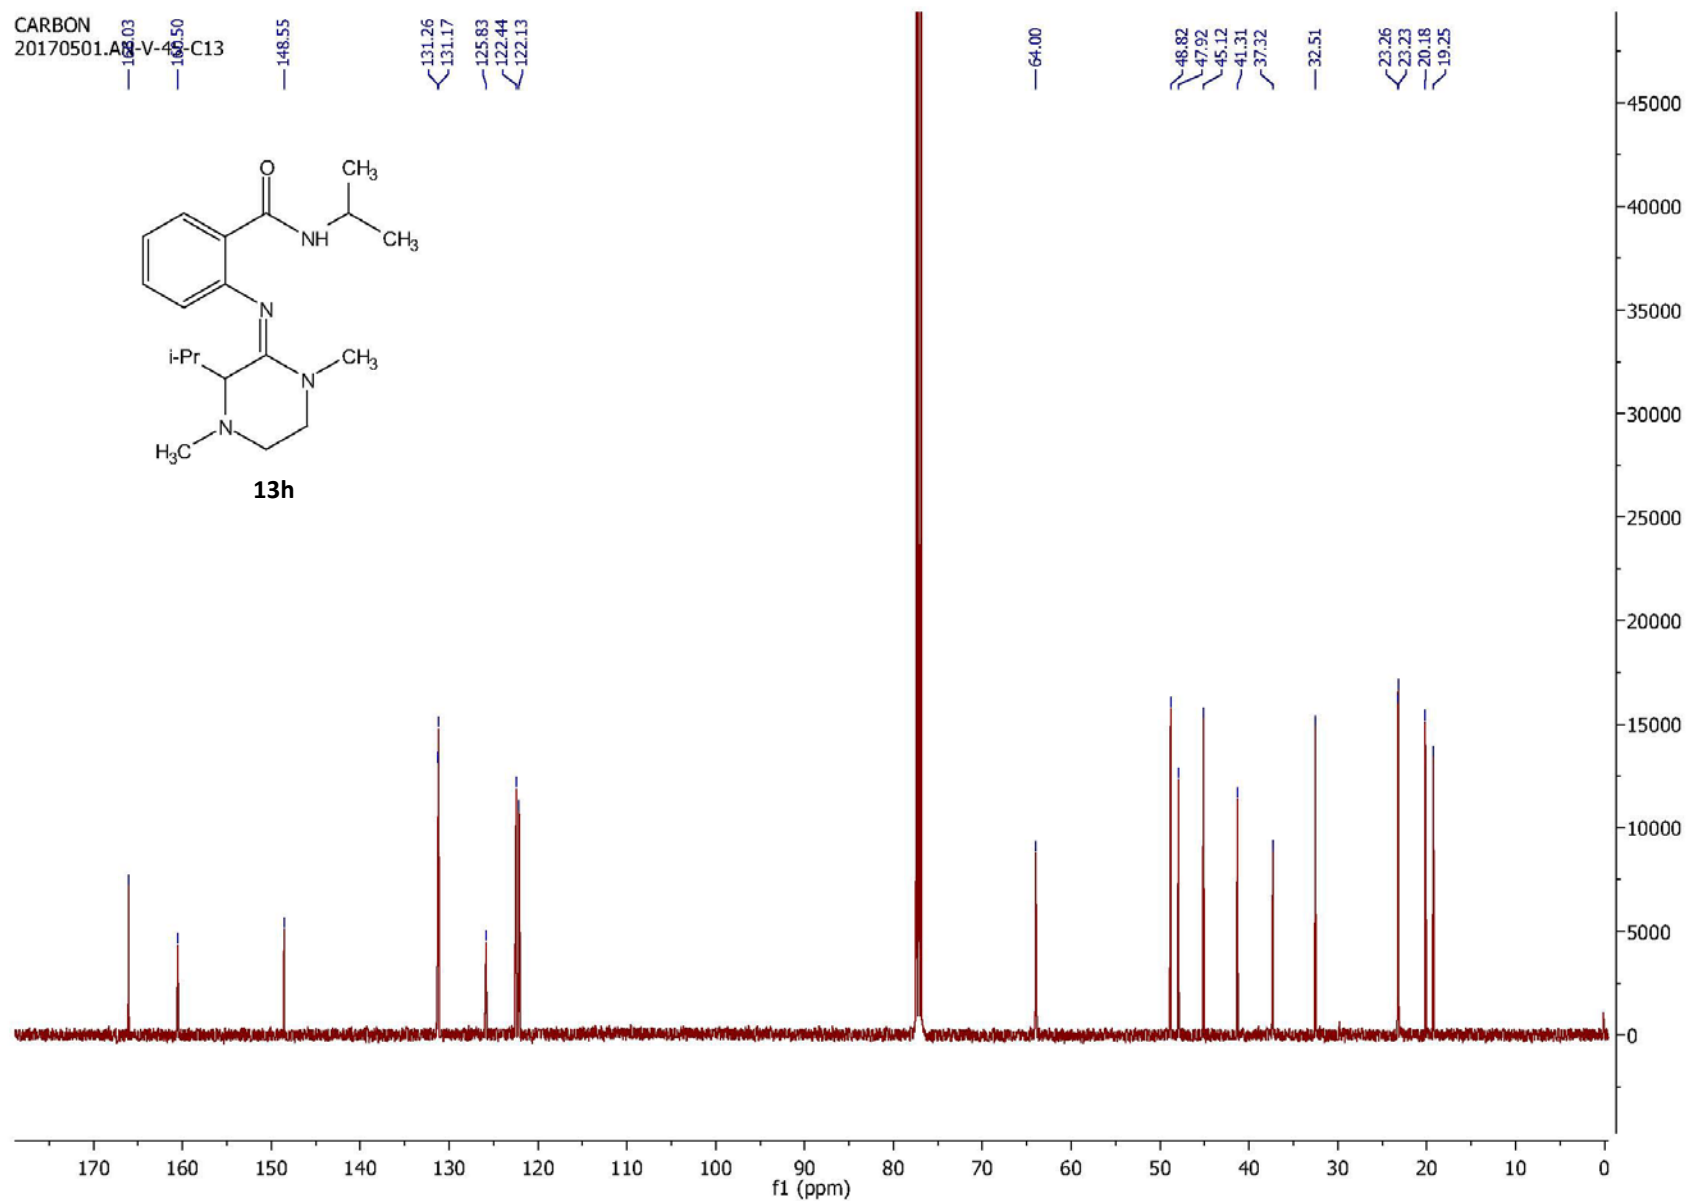

2017-06-12.1329-2.alok.1.fid

AN-V-80-Photon

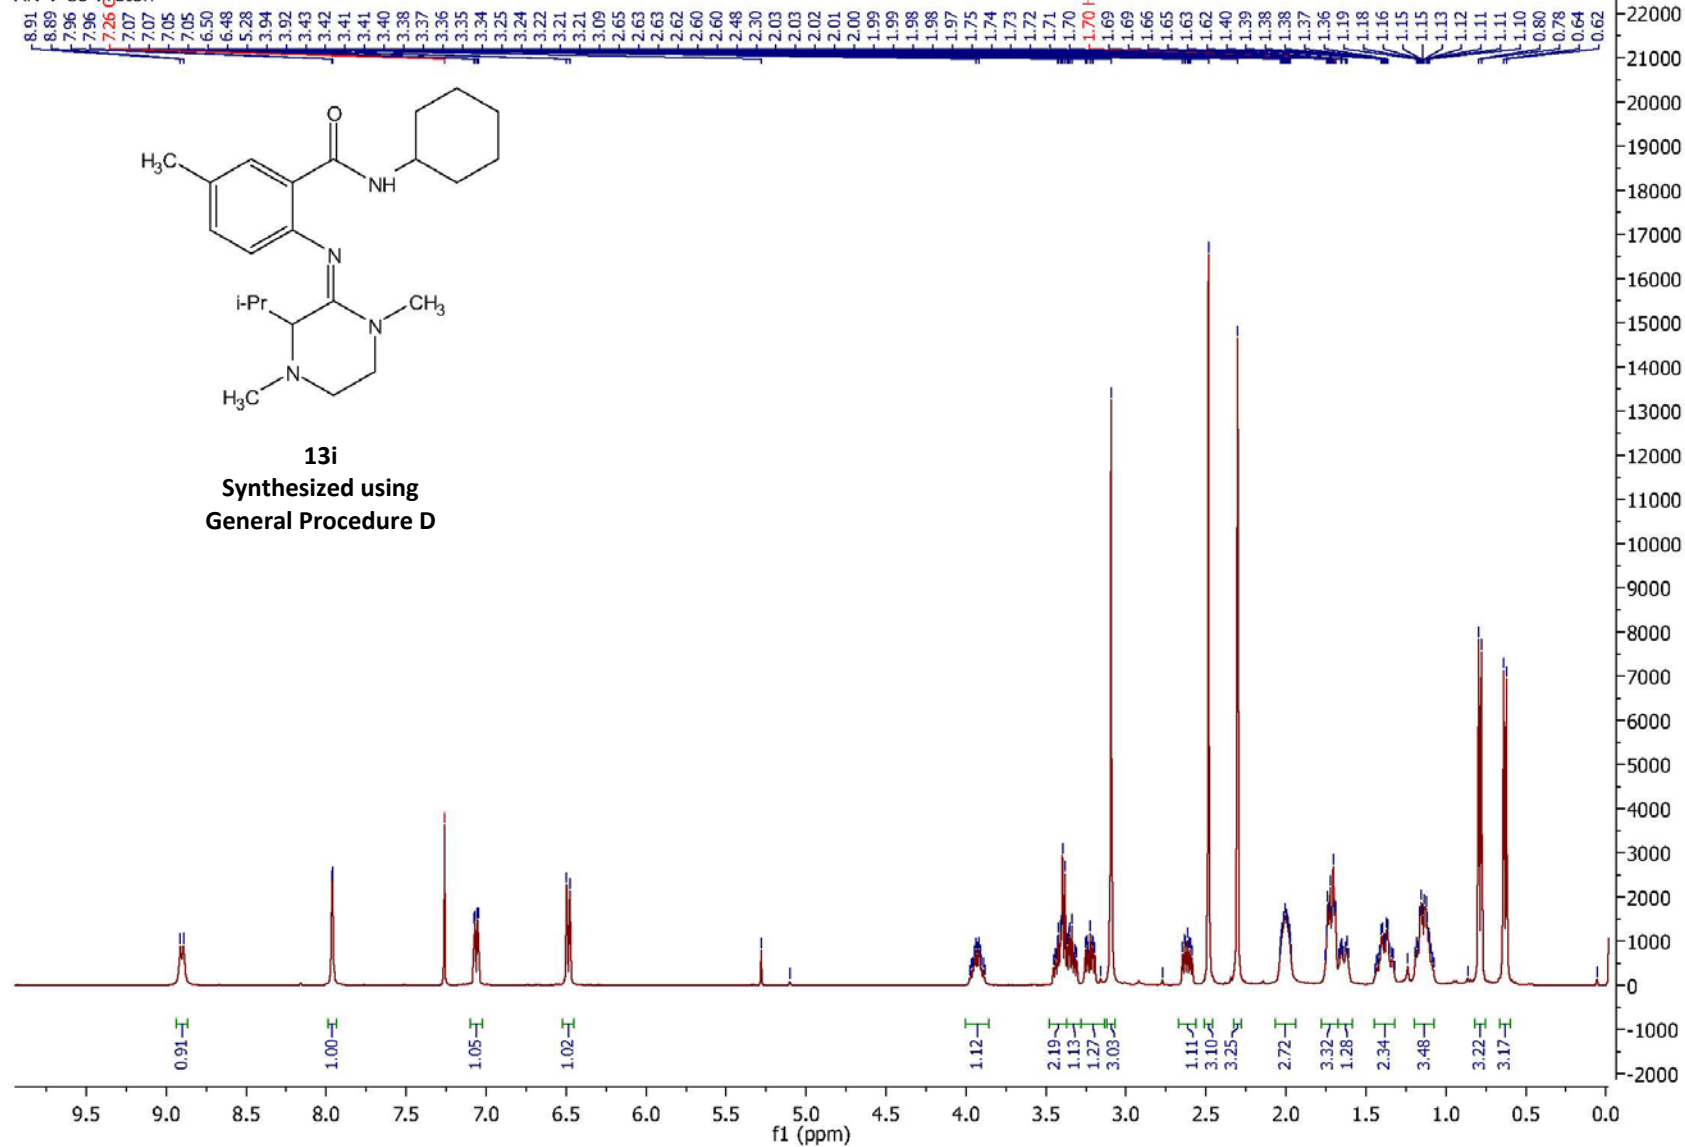

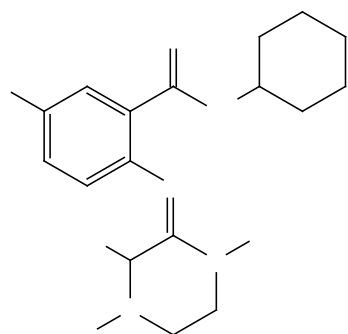

**13i**  
 Synthesized using  
 General Procedure E

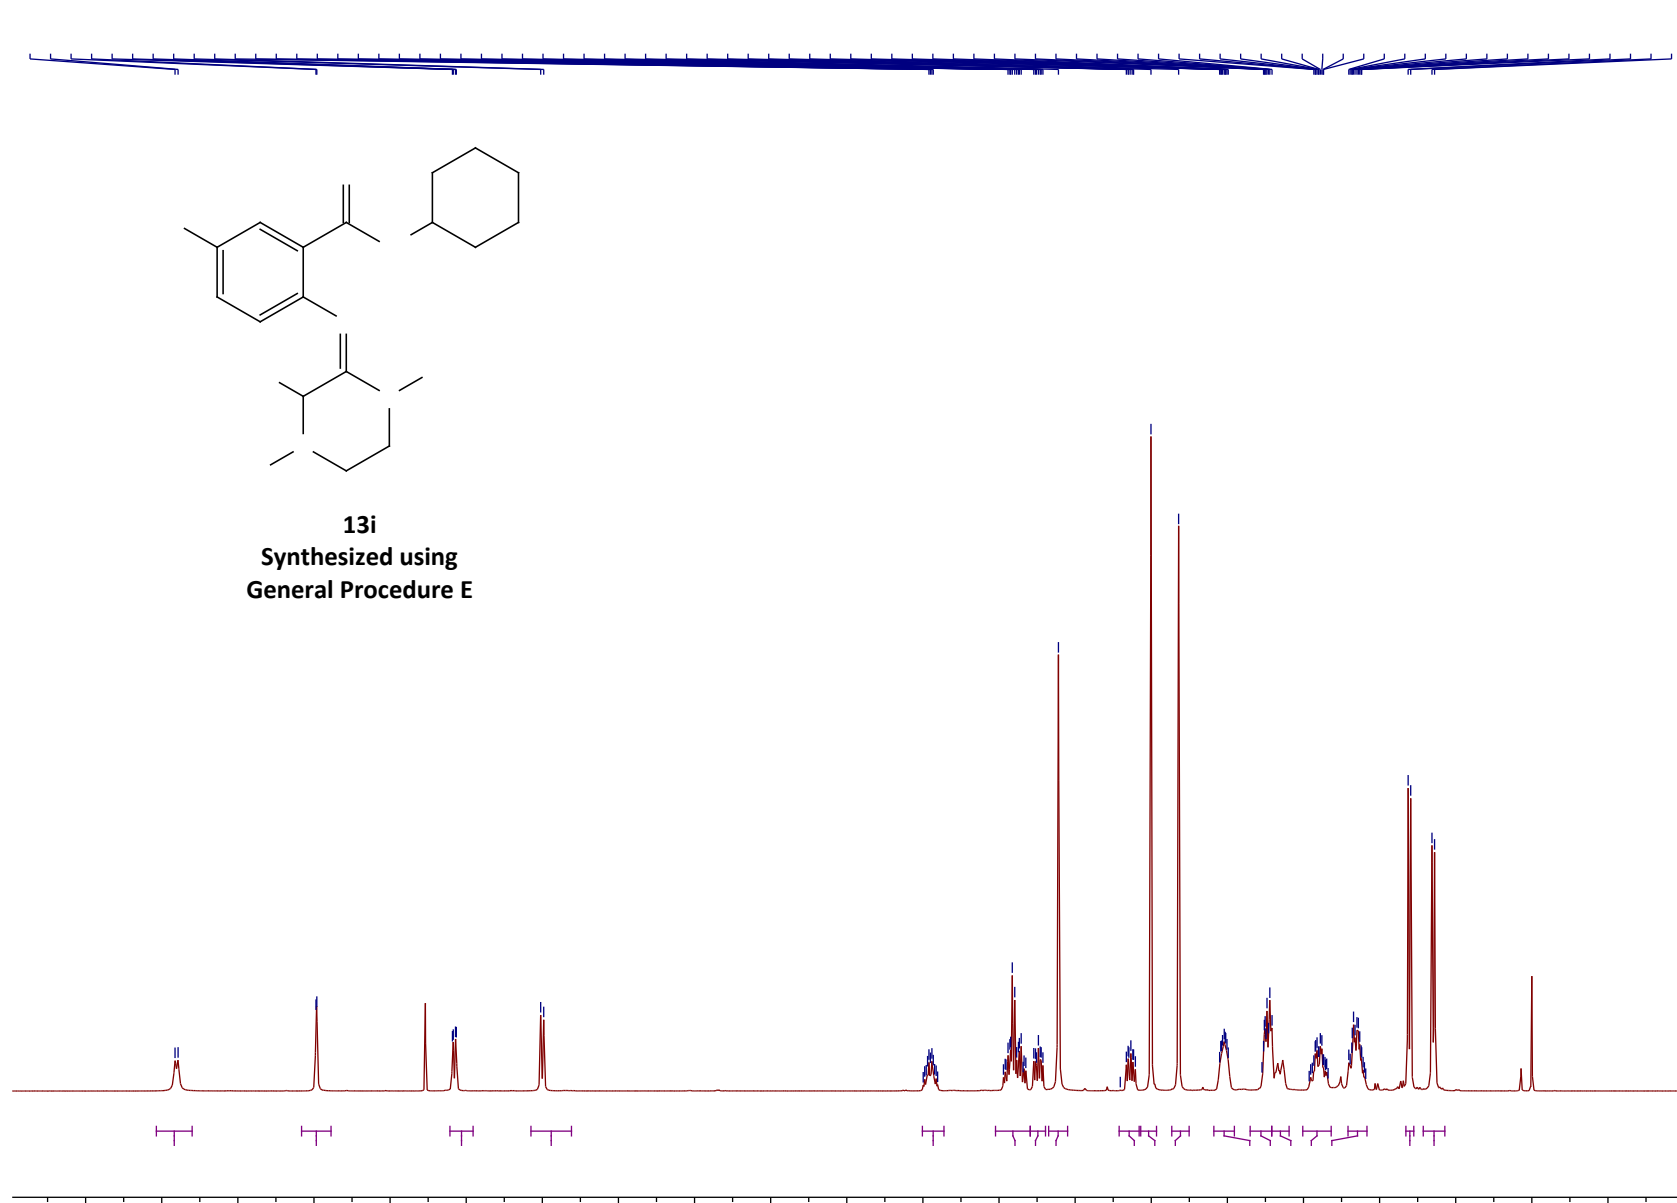



2017-06-12.1329-2.alok.2.fid  
AN-V-80-carbon

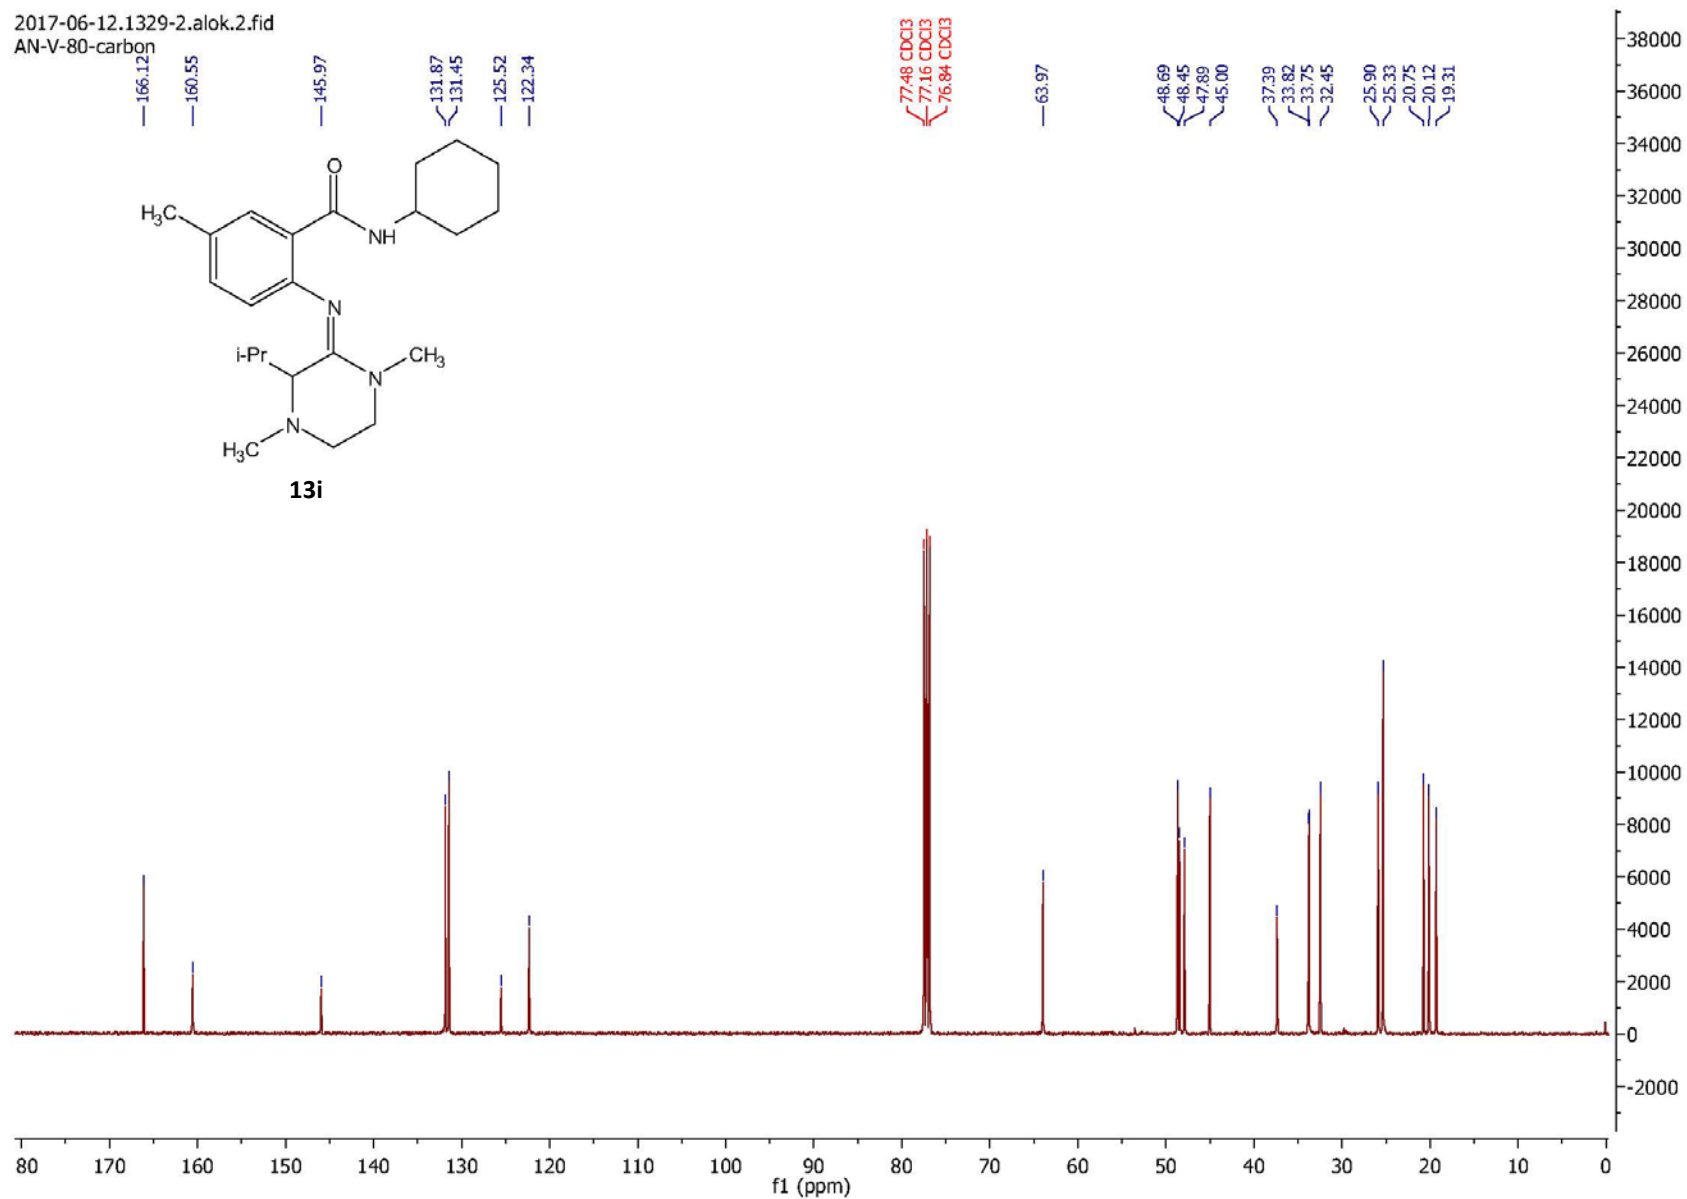

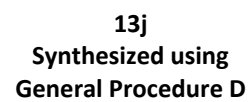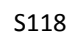

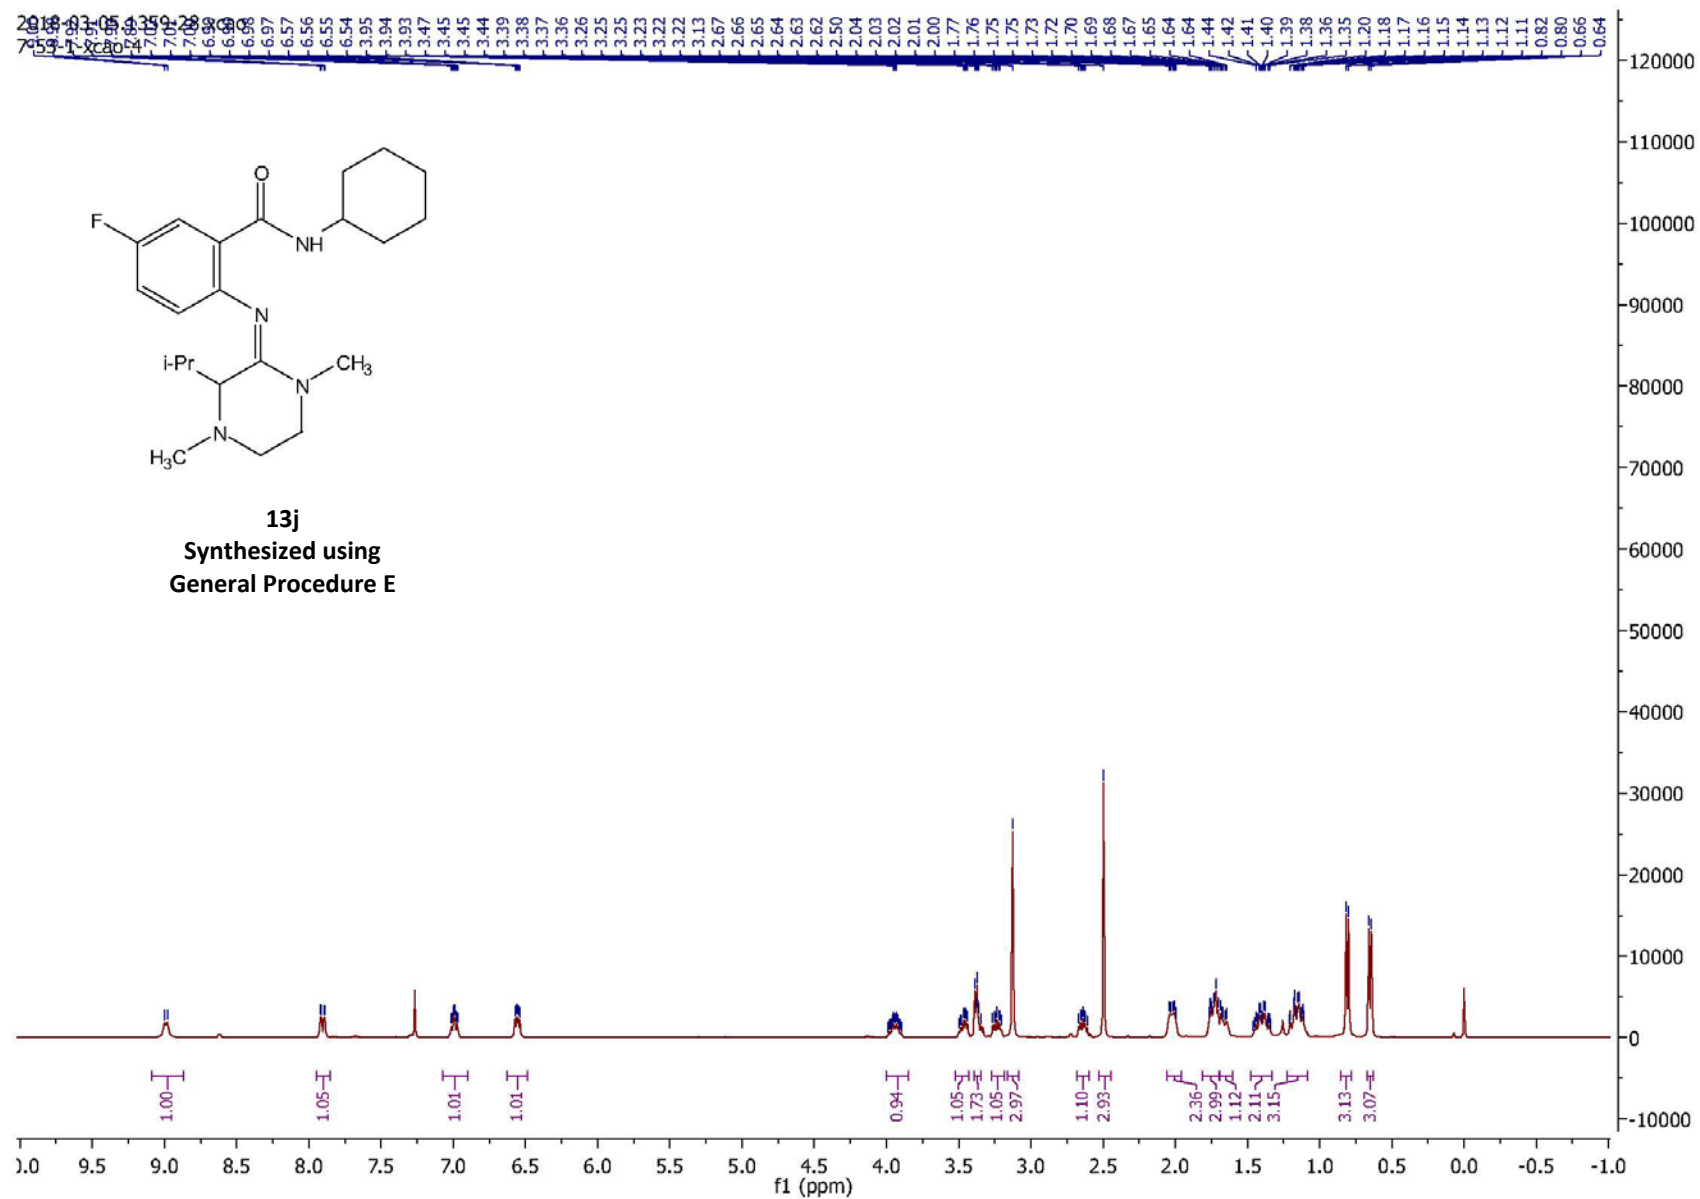

2018-10-23.1736-1.victor.2.fid  
7-53-1-xcao-4

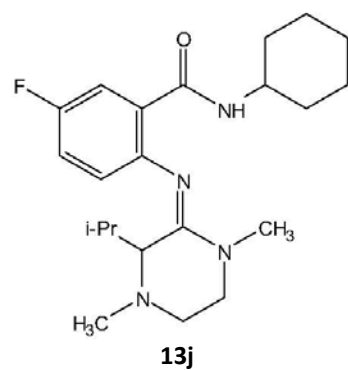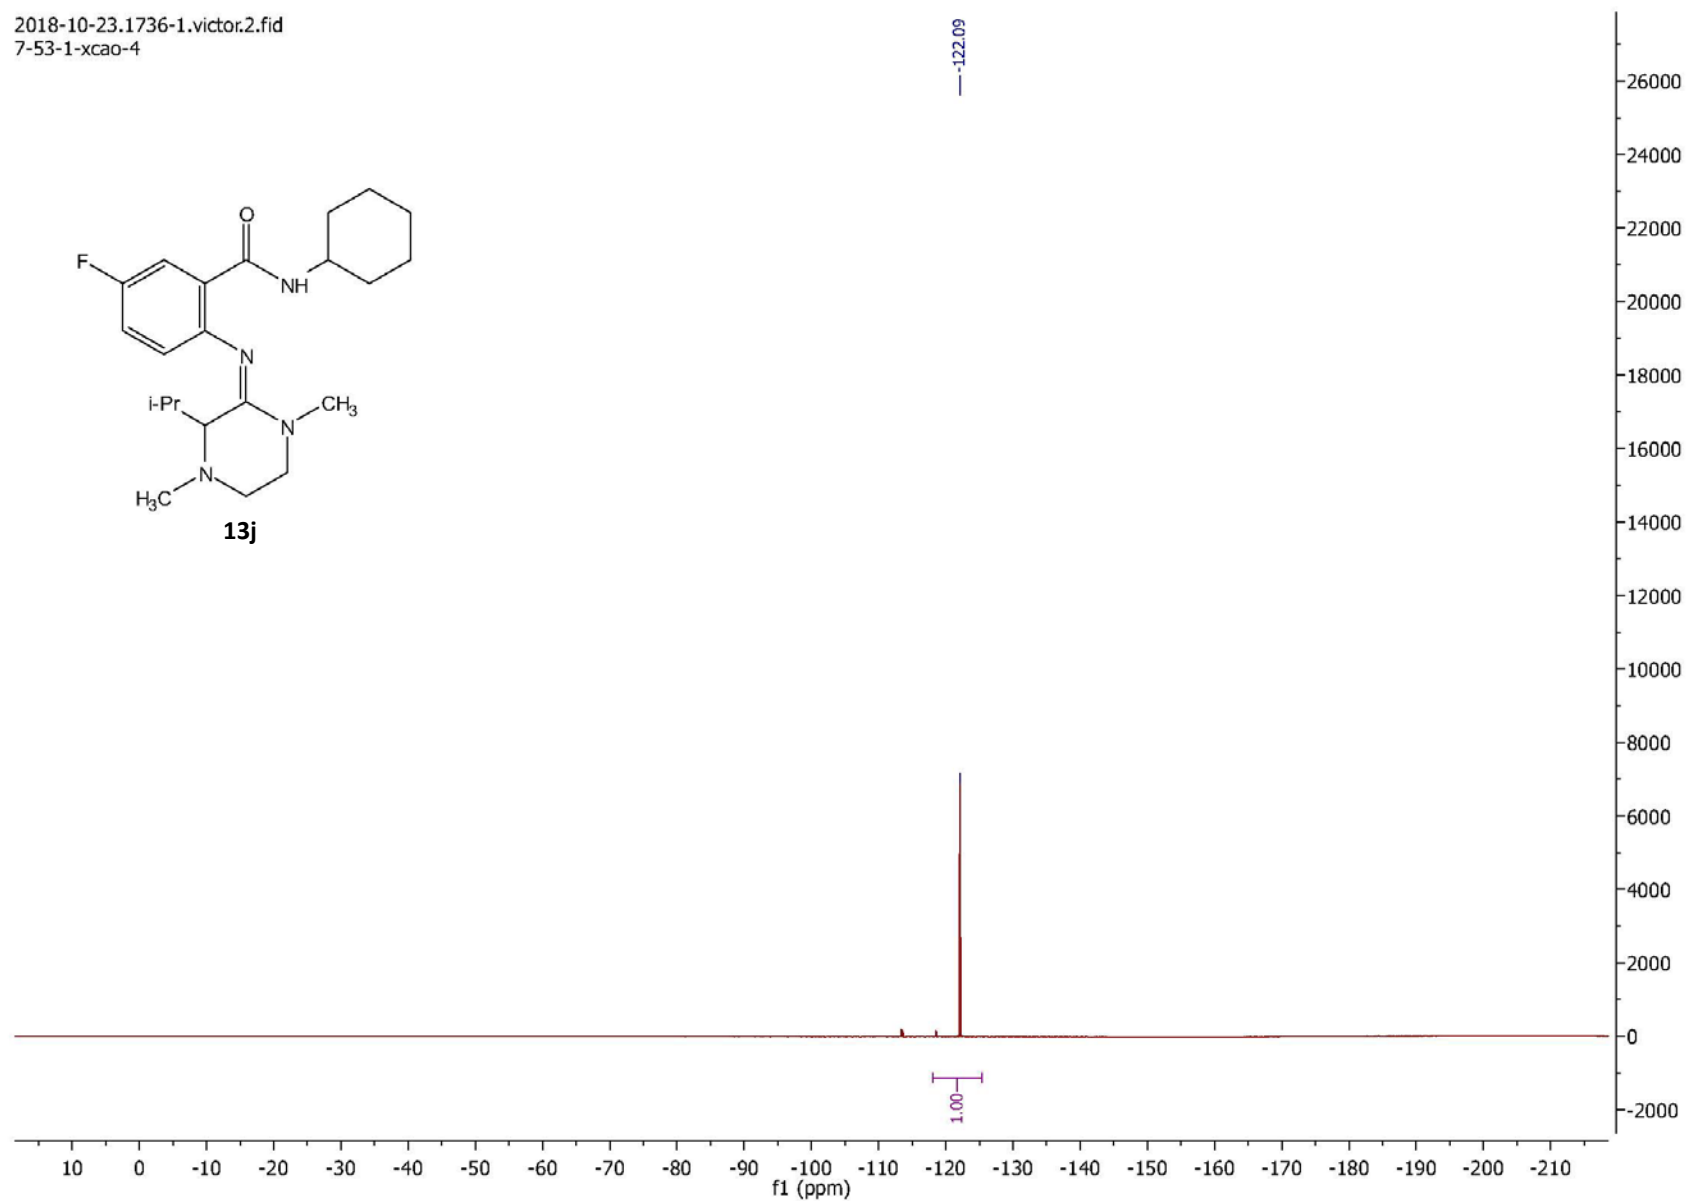

2018-03-05 19:59:28 xcao  
7-53-1-xcao

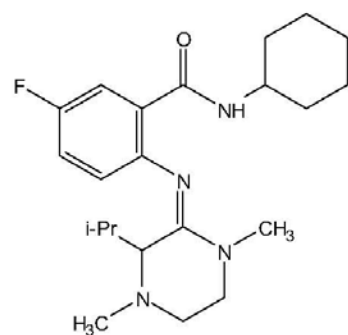

**13j**

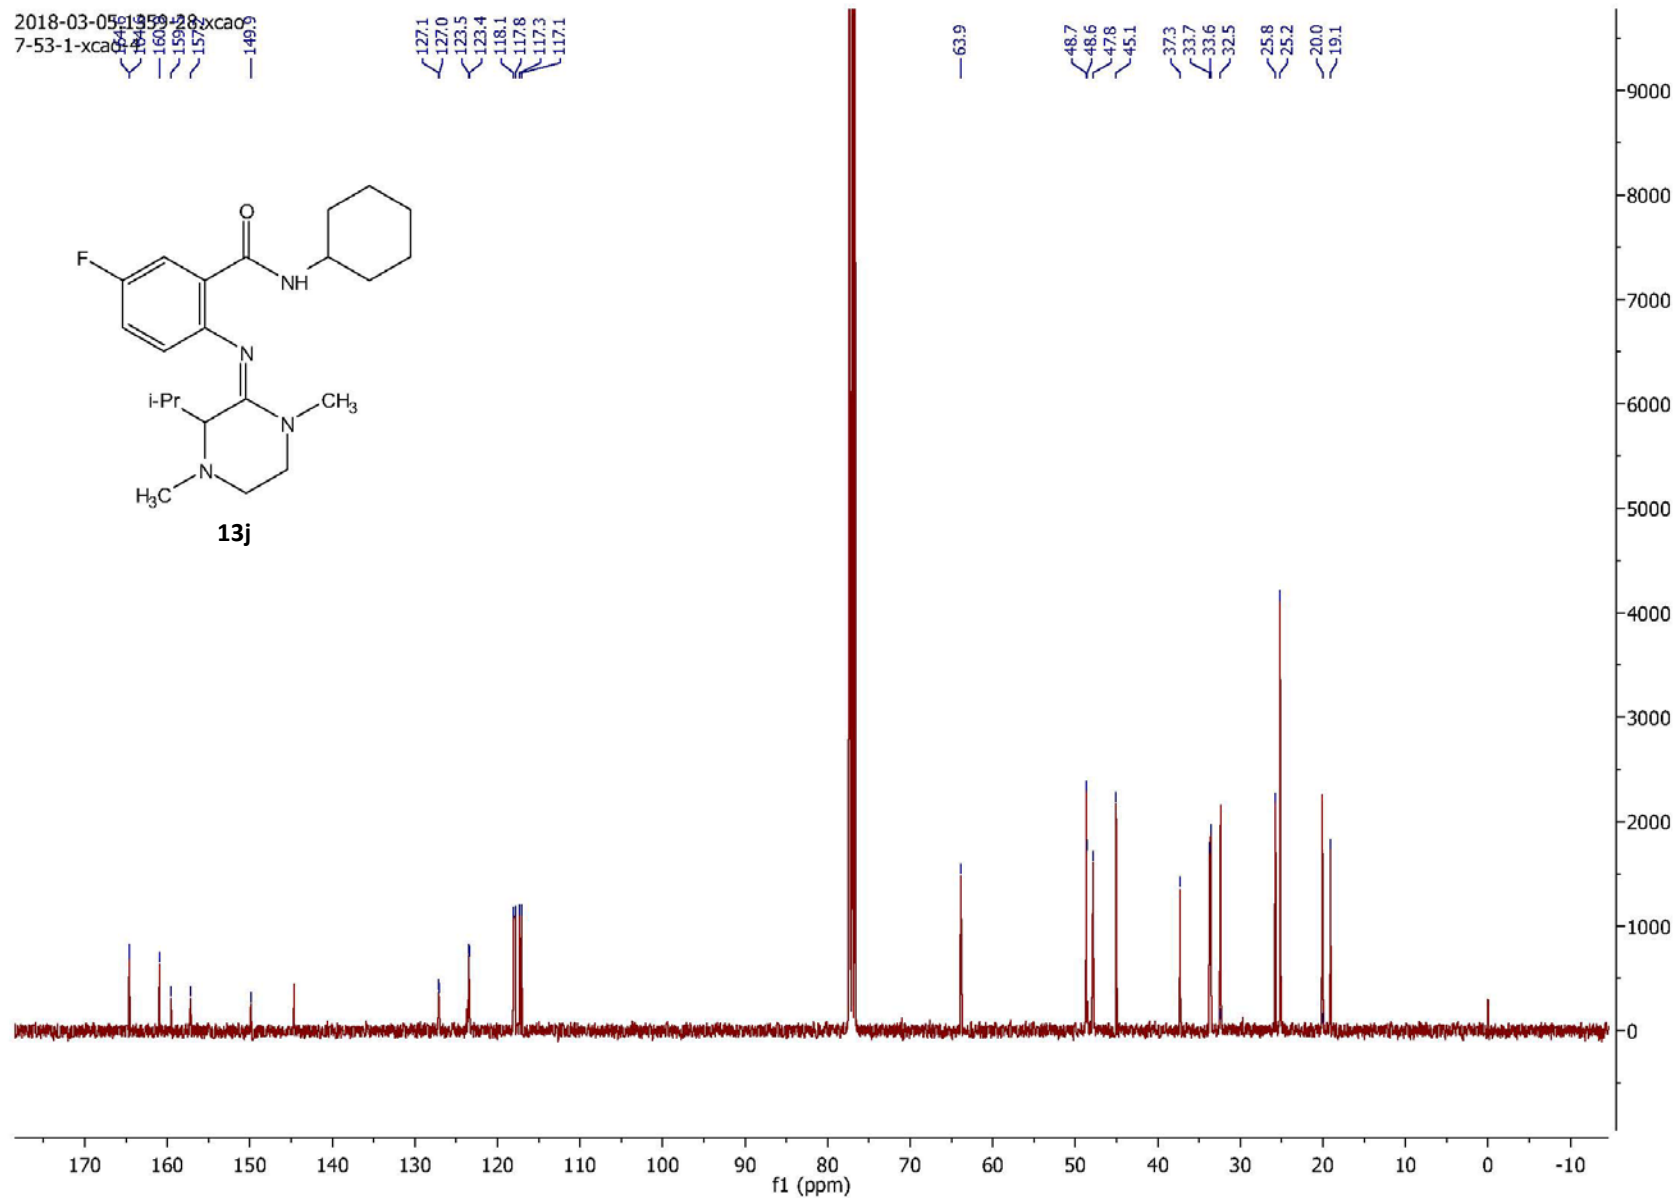

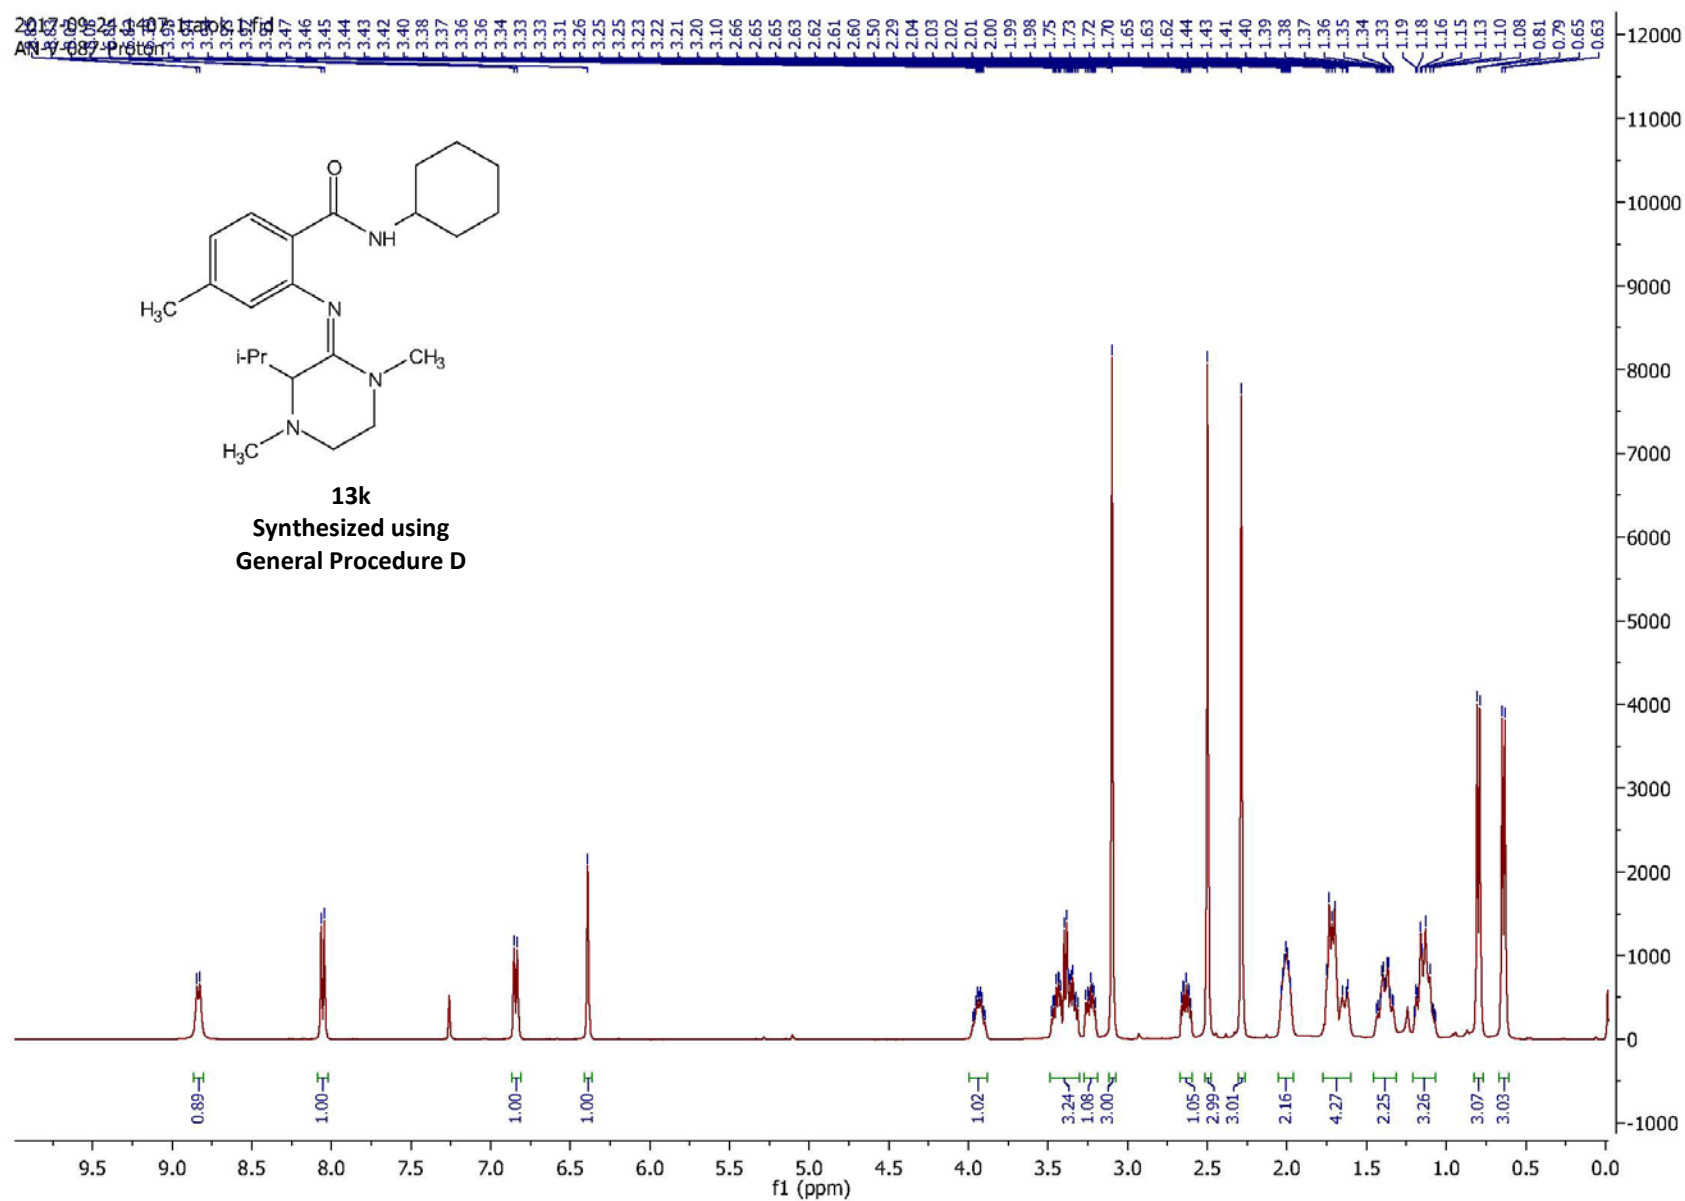

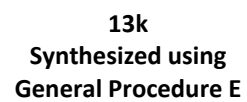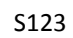

2017-09-24 1407-1 Palok.2.fid  
AN-V-087-Carbon

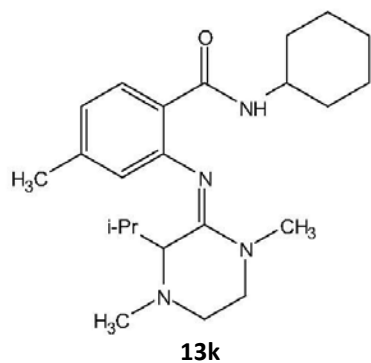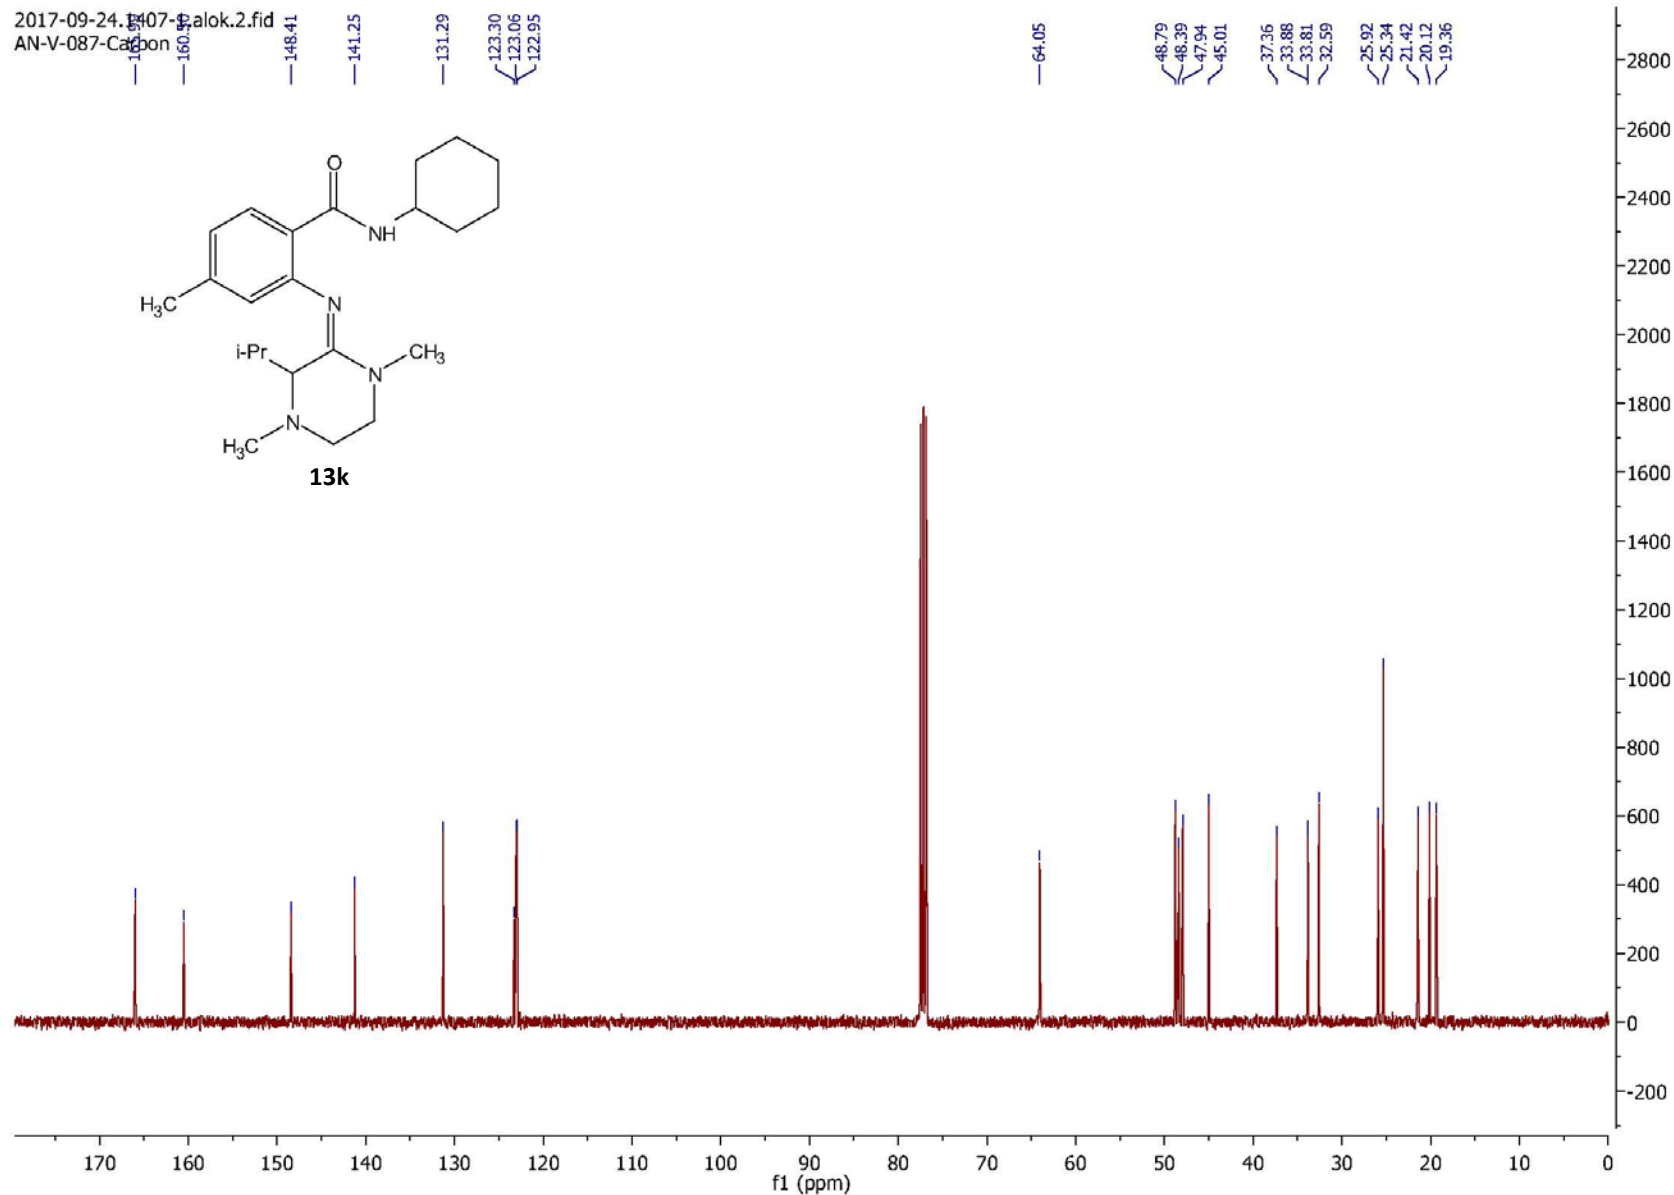



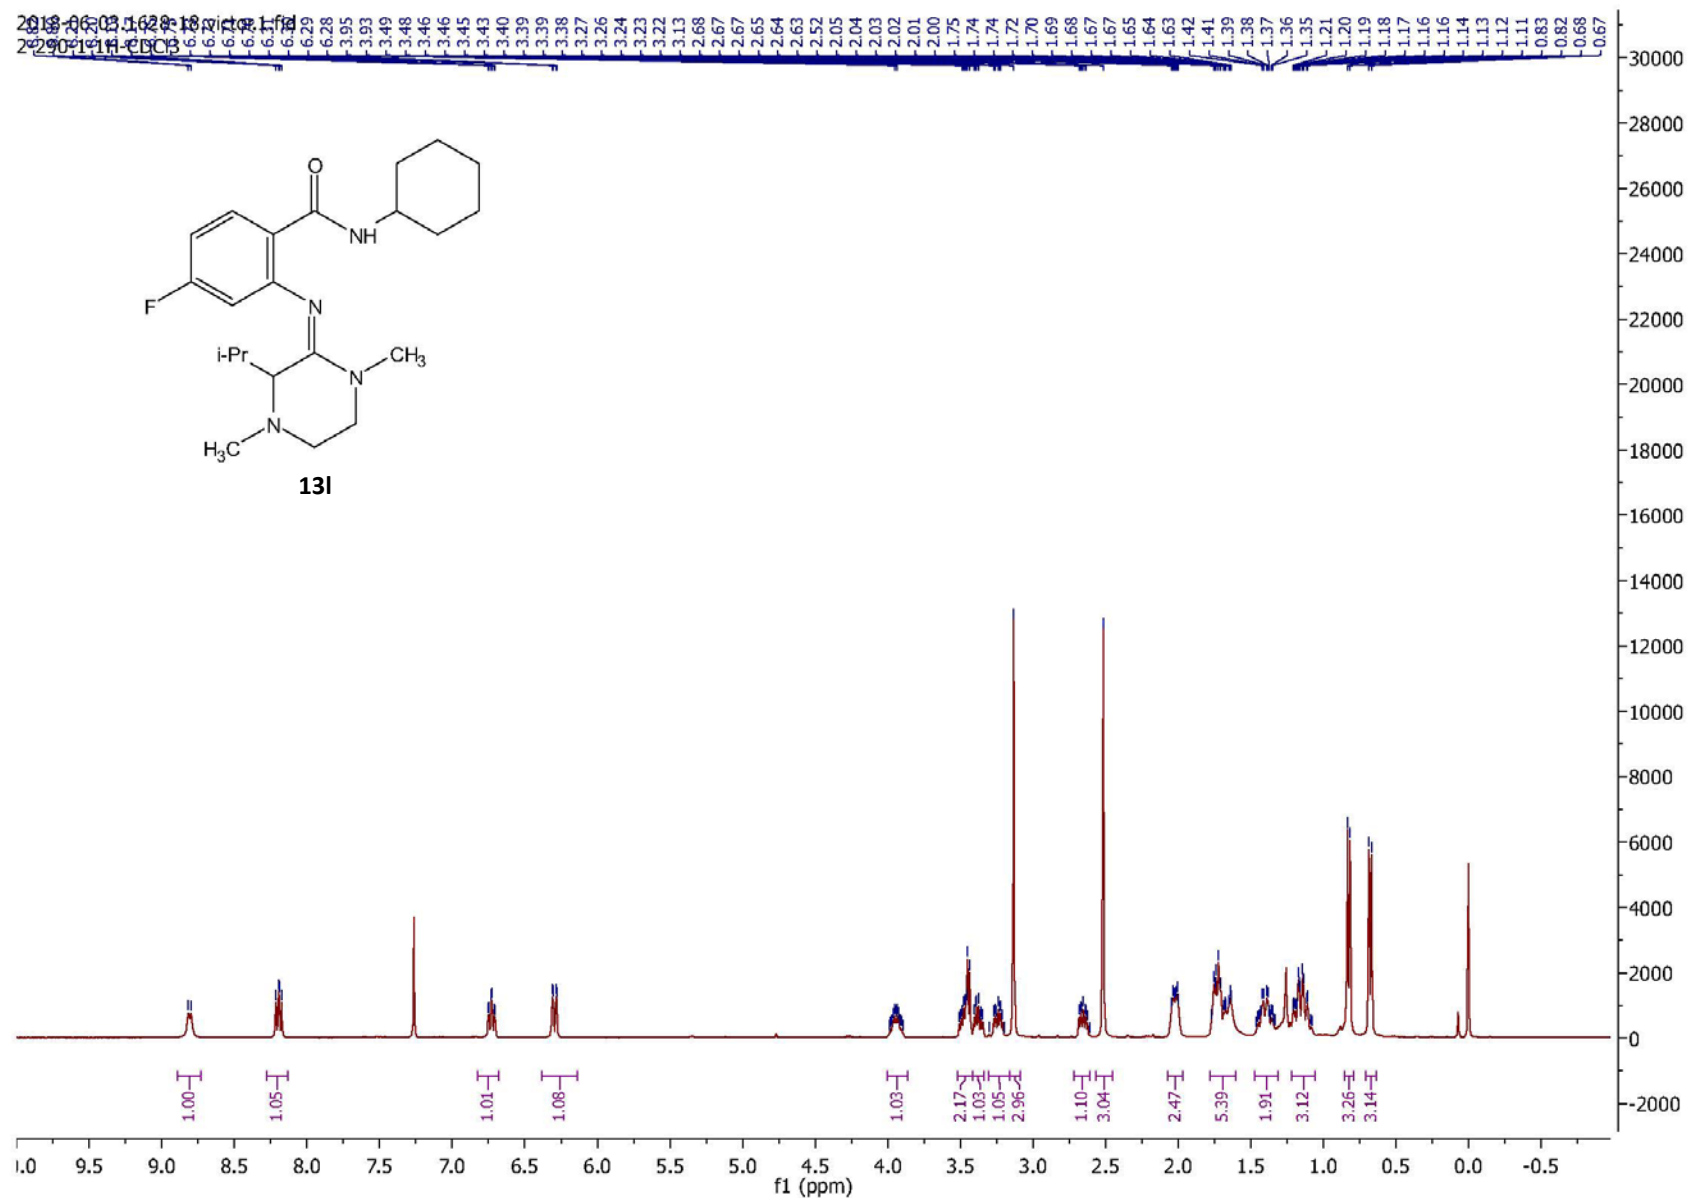

2018-06-03.1628-18.victor.2.fid  
2-290-1-1H-CDCl3

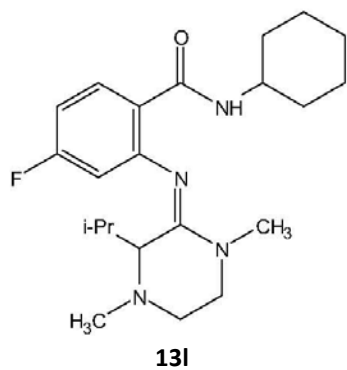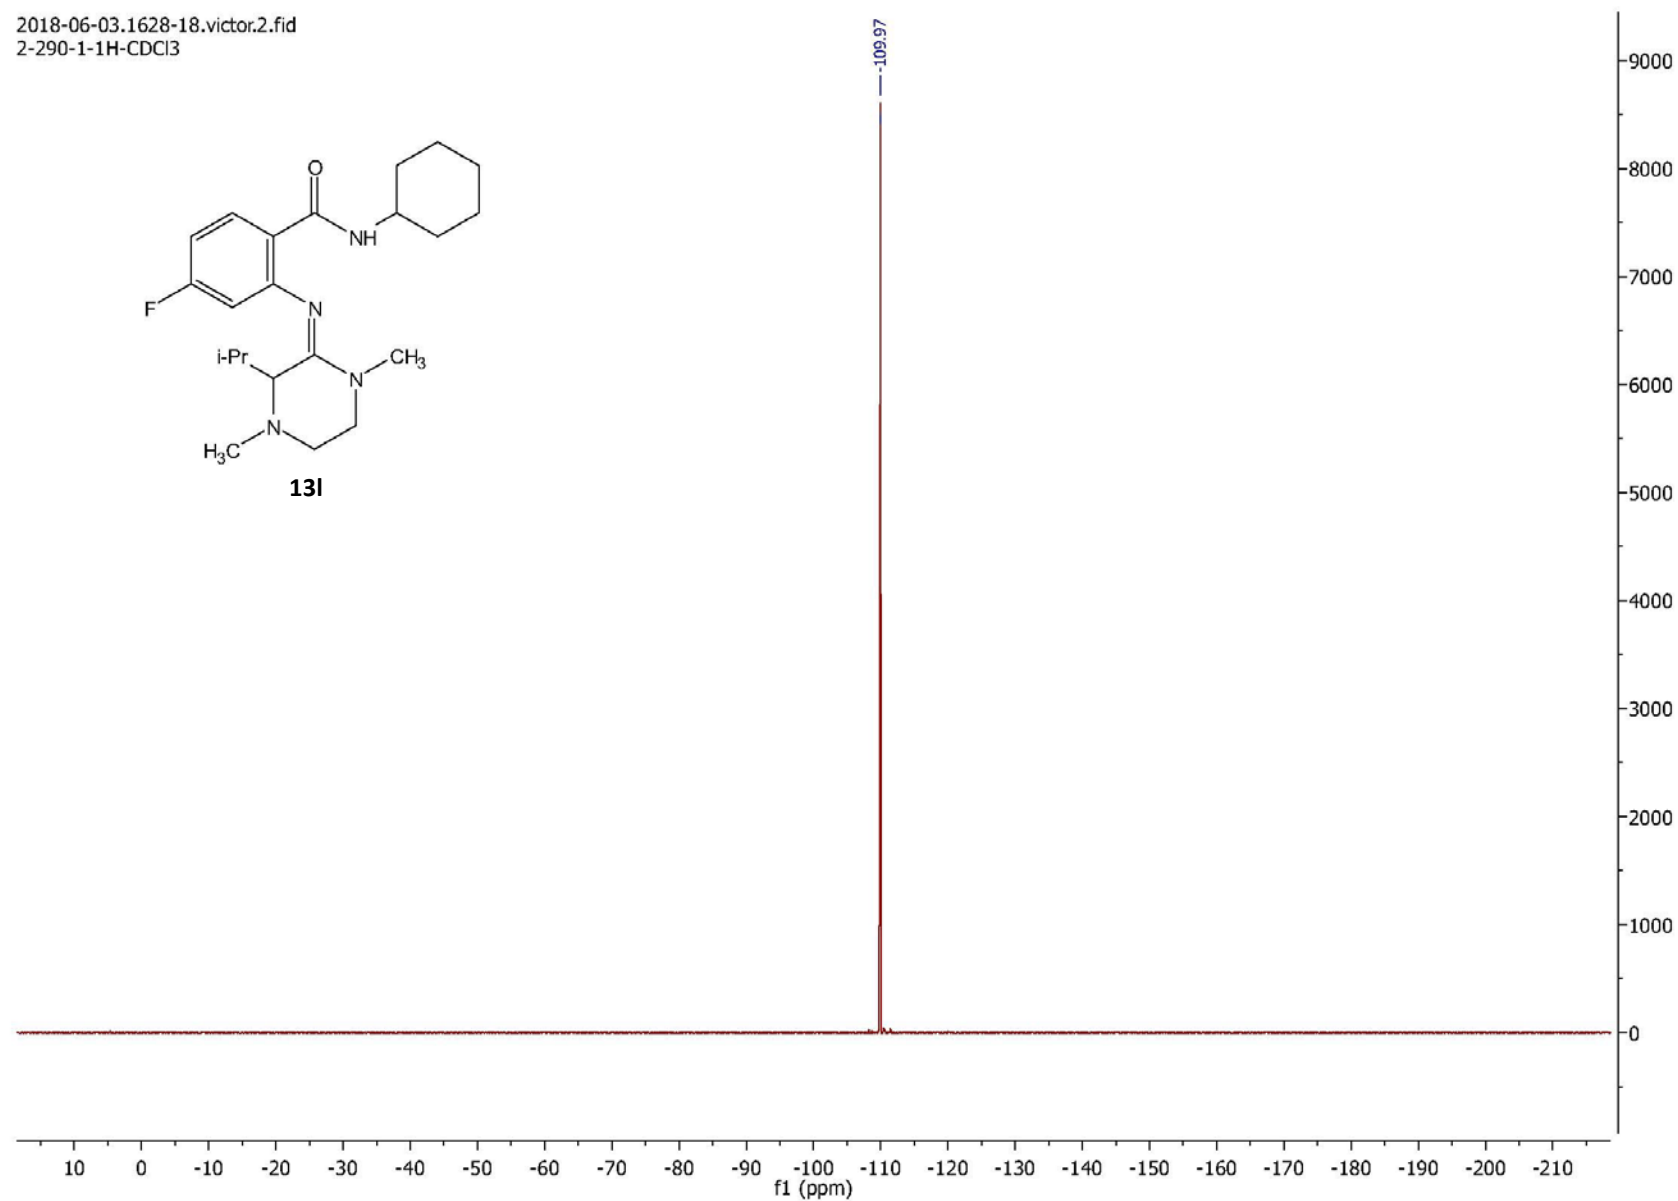

2018-06-03.1628-18.victor.3.fid  
2-290-1-1H-CDCl3

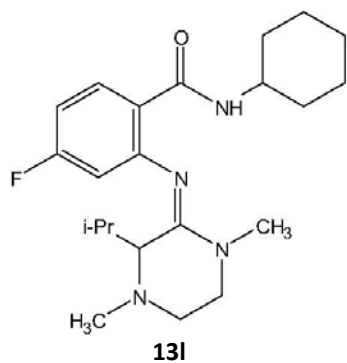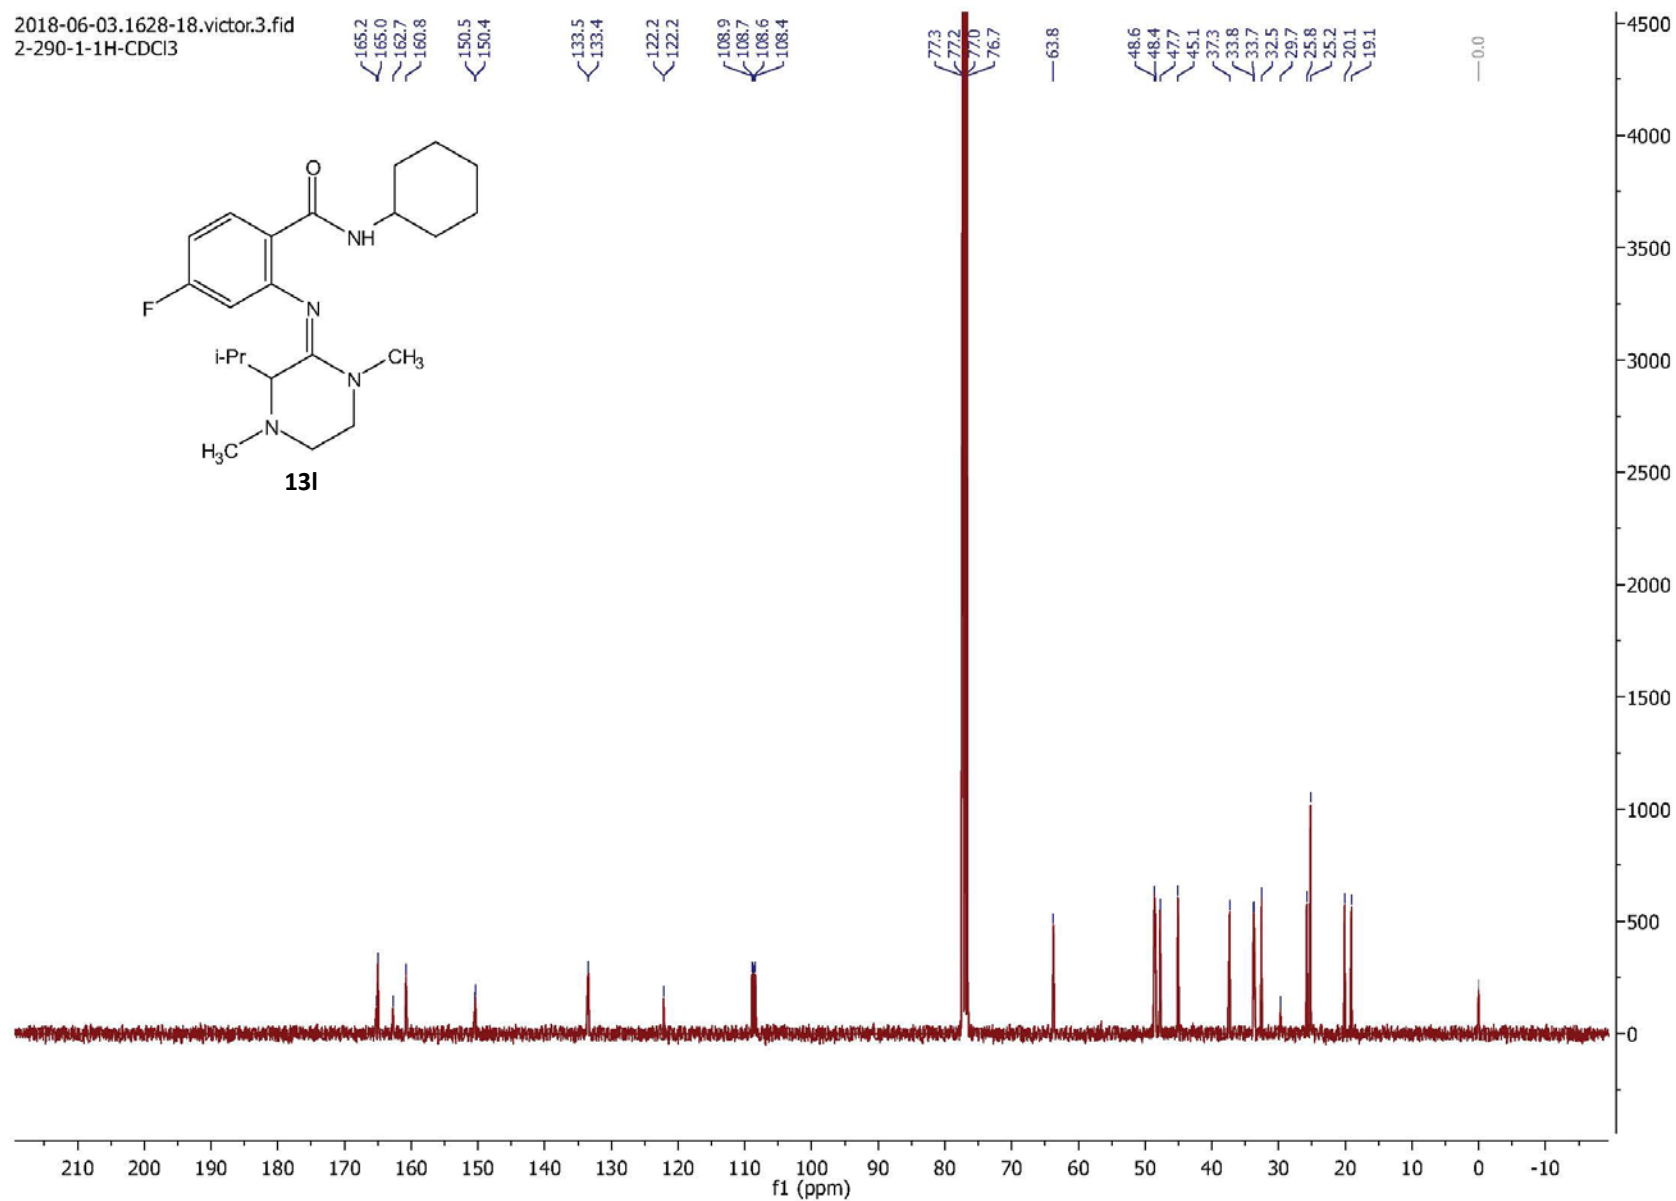

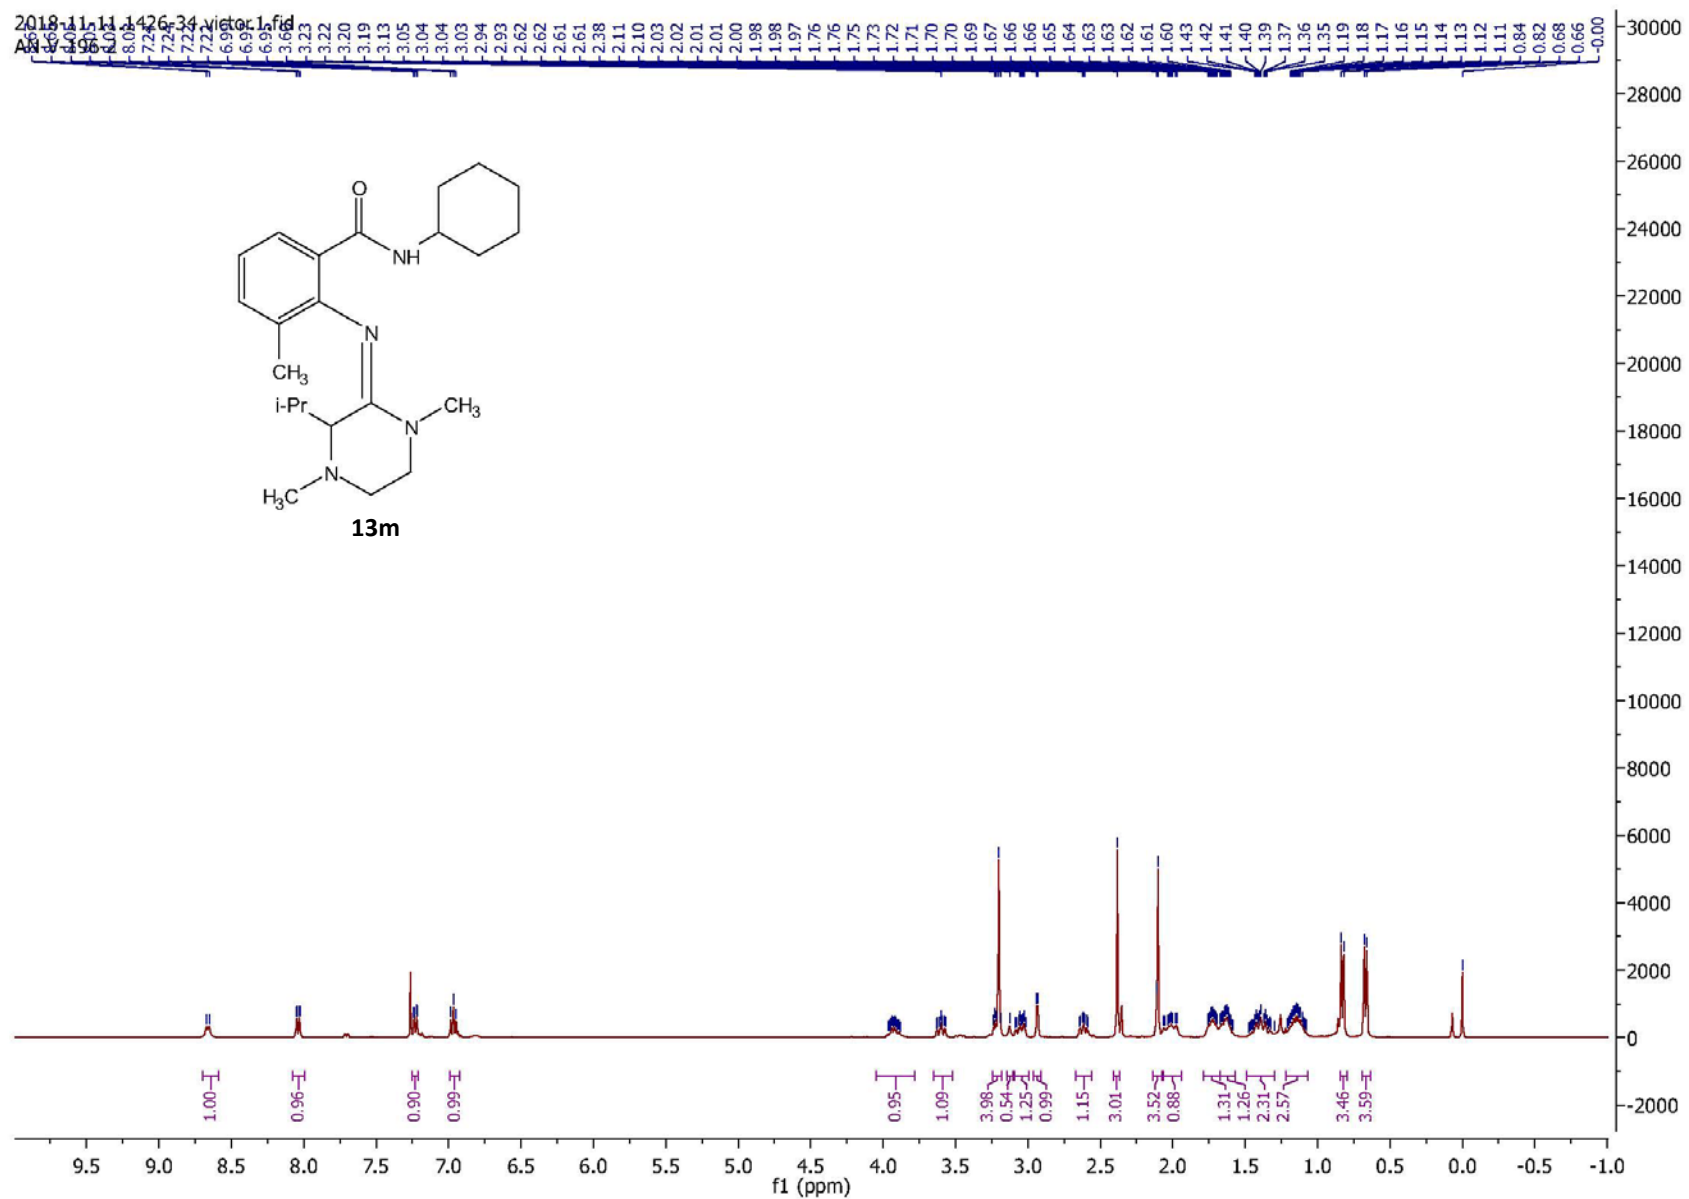

2018-11-11.1426-34.victor.2.fid  
AN-V-196-2

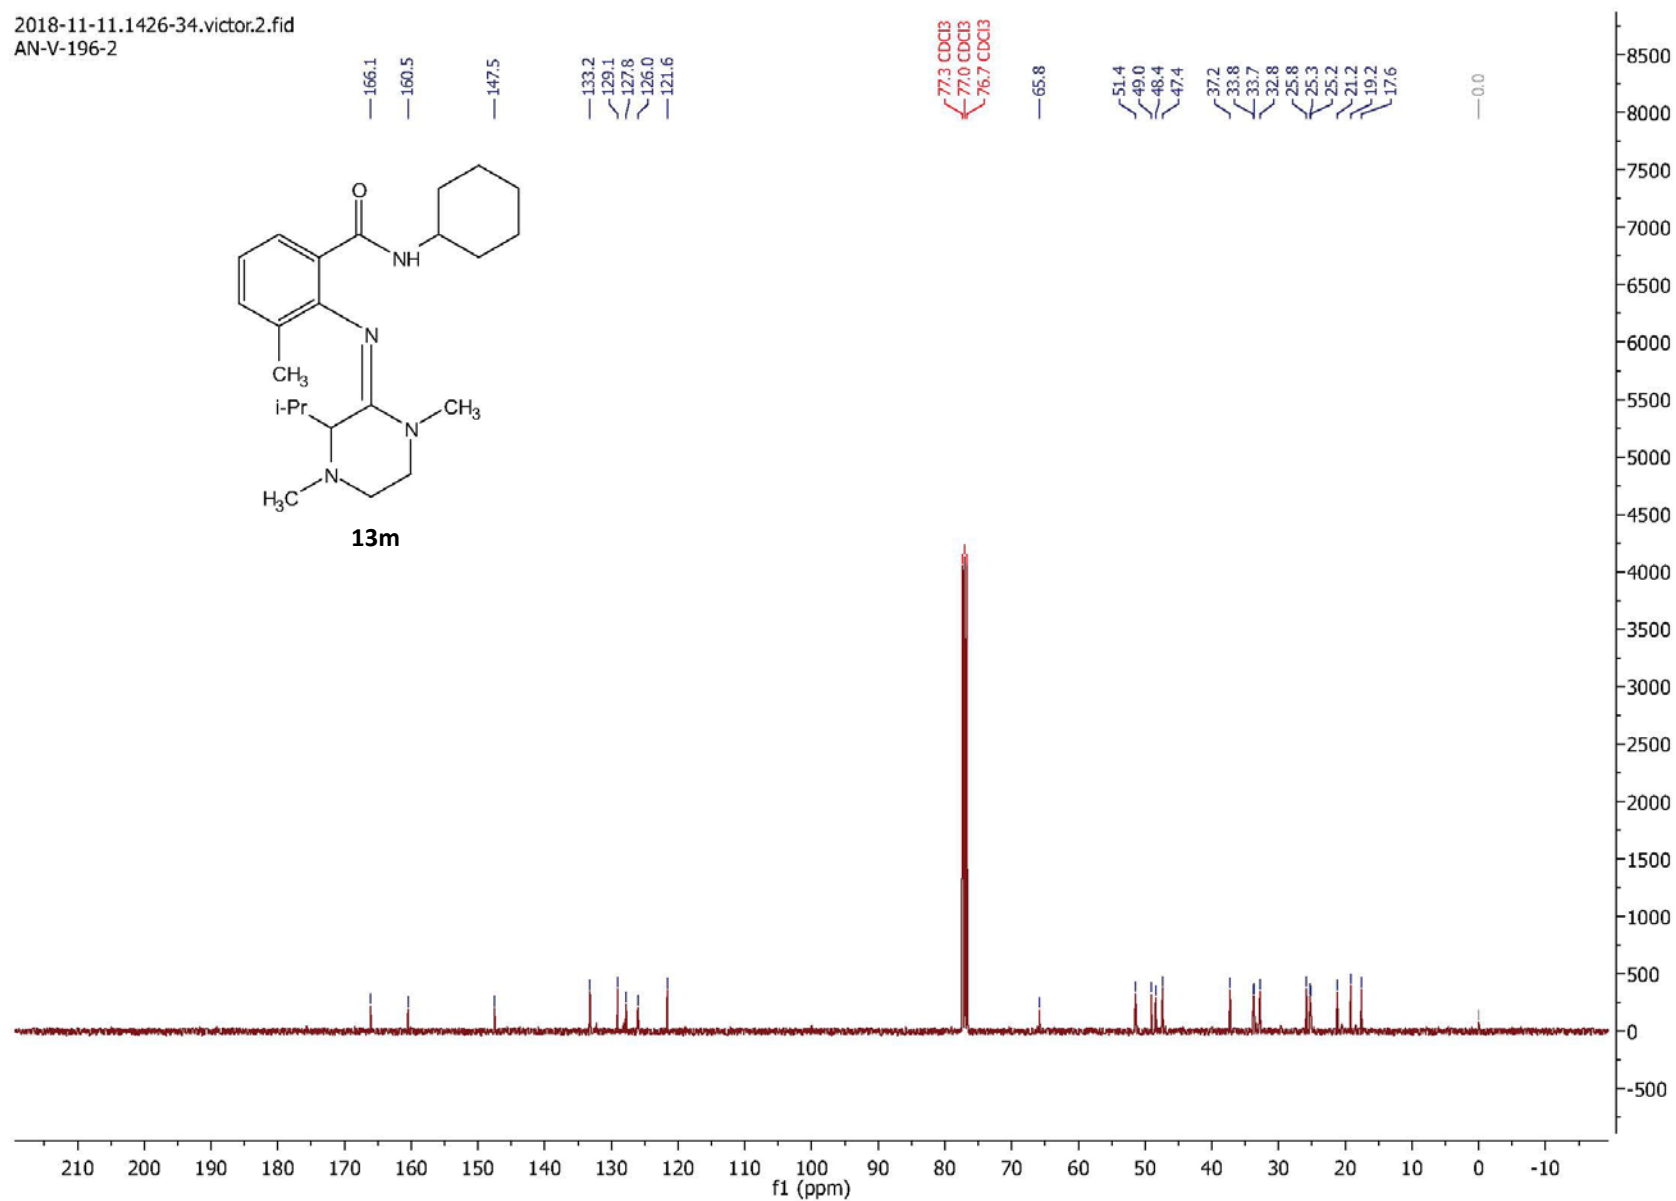

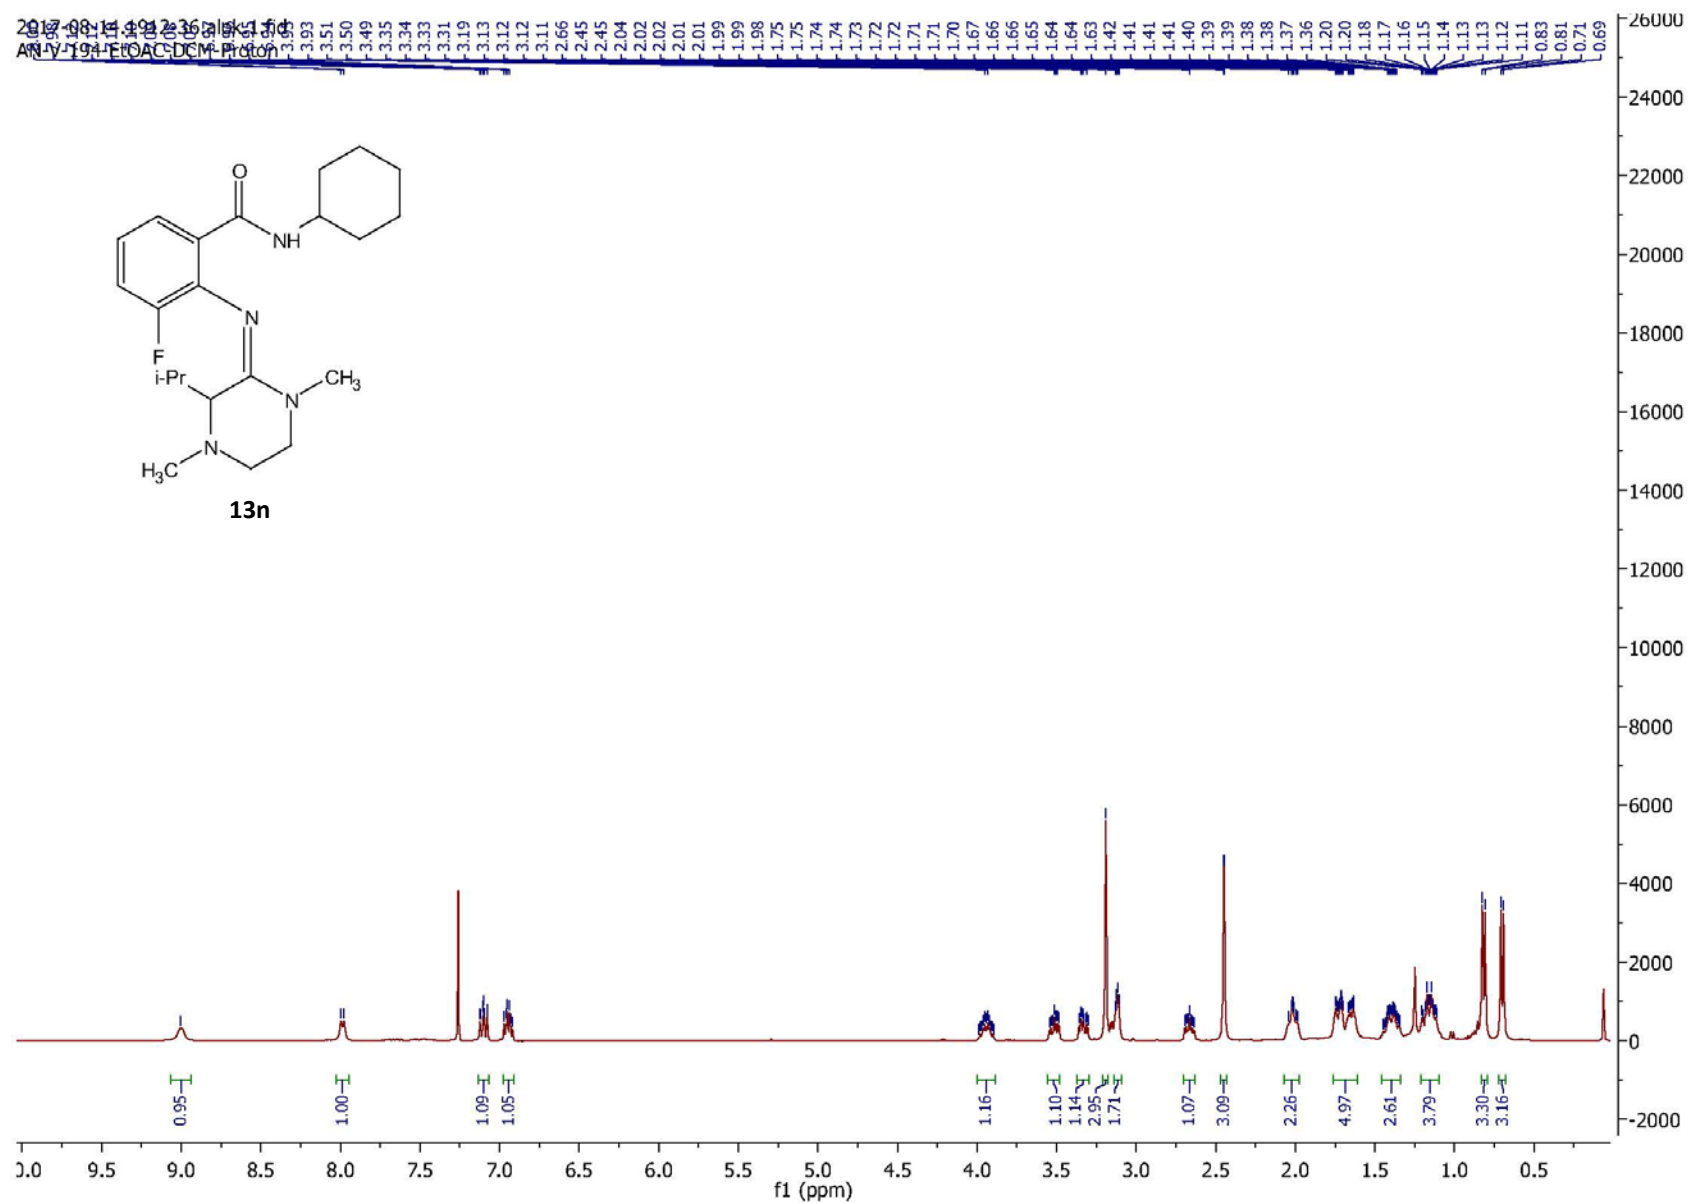

2018-10-19.1513-48.victor.2.fid  
AN-V-194

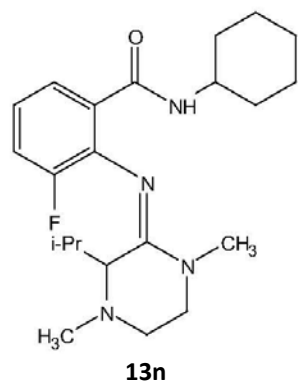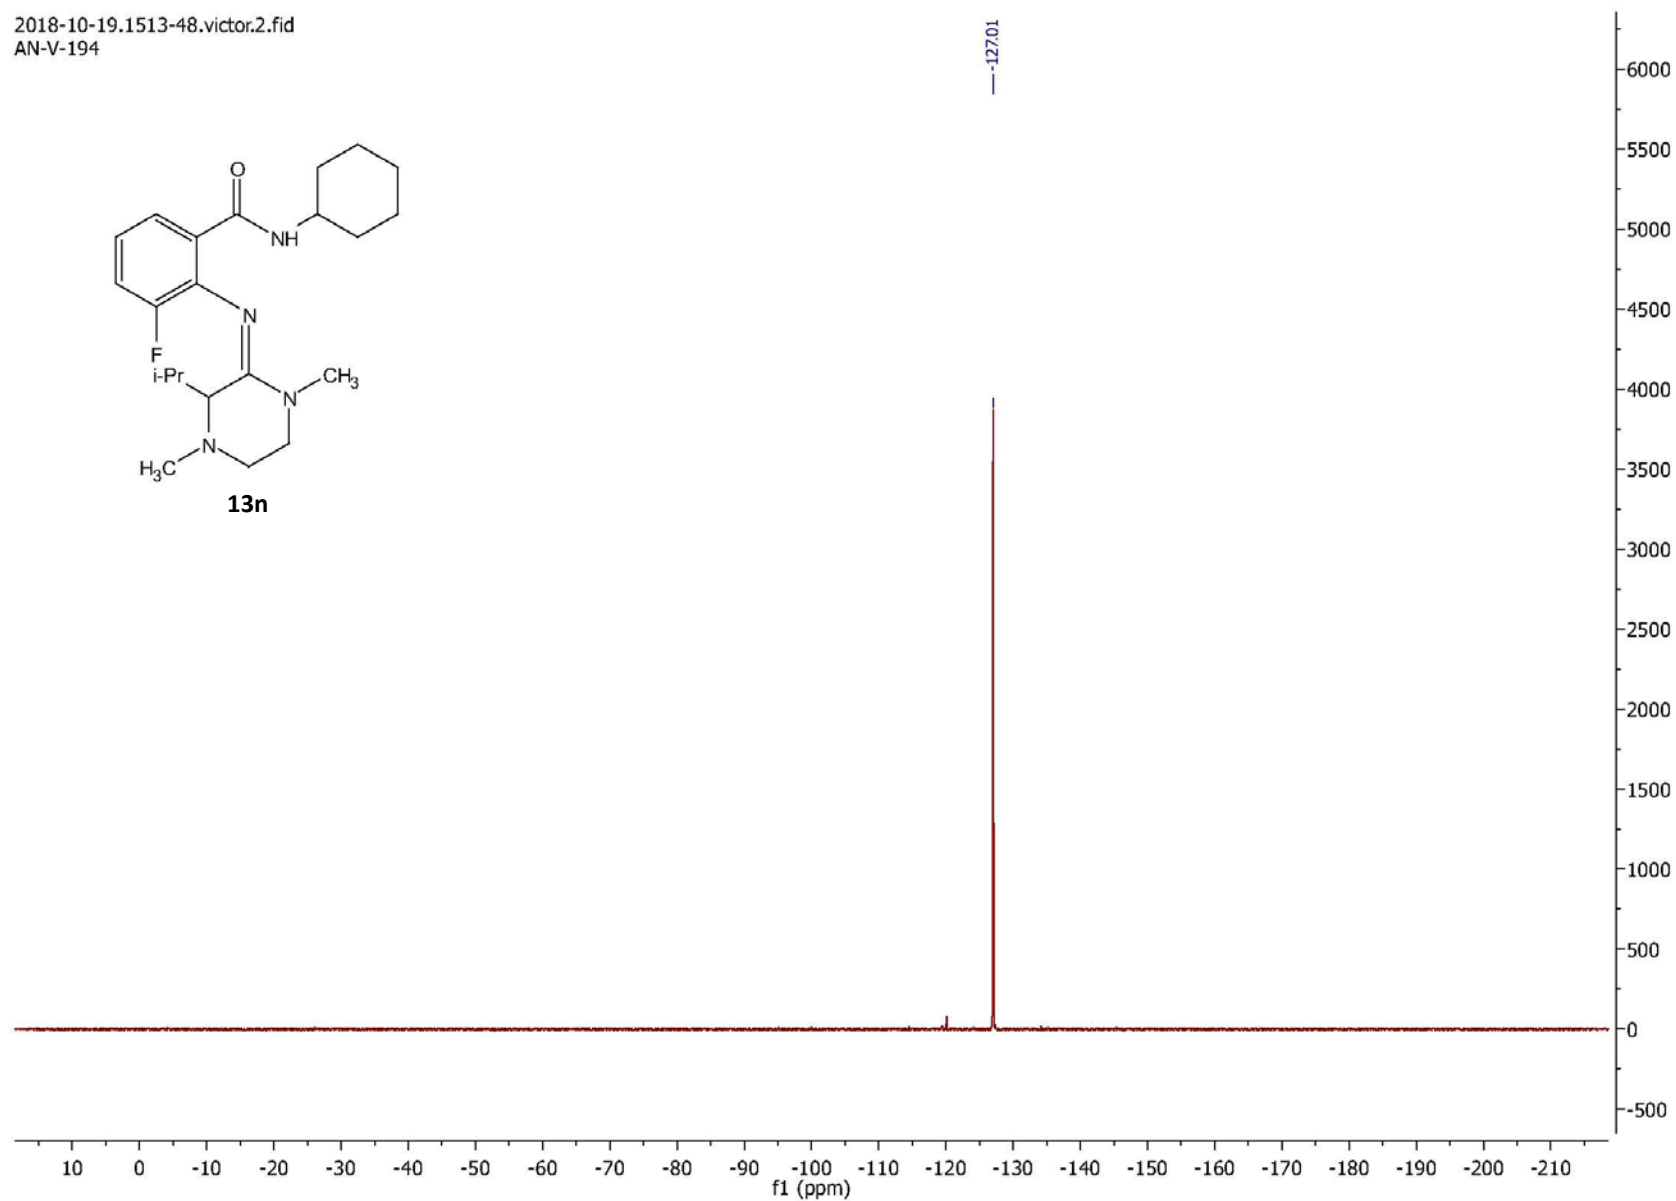

2017-08-14.1912-36.glok.2.fid  
AN-V-1948 EtOAc-D<sub>2</sub>O

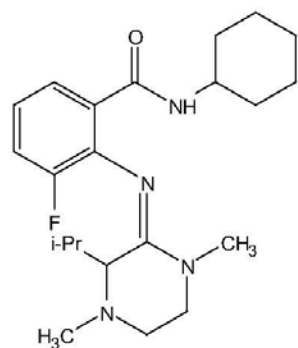

**13n**

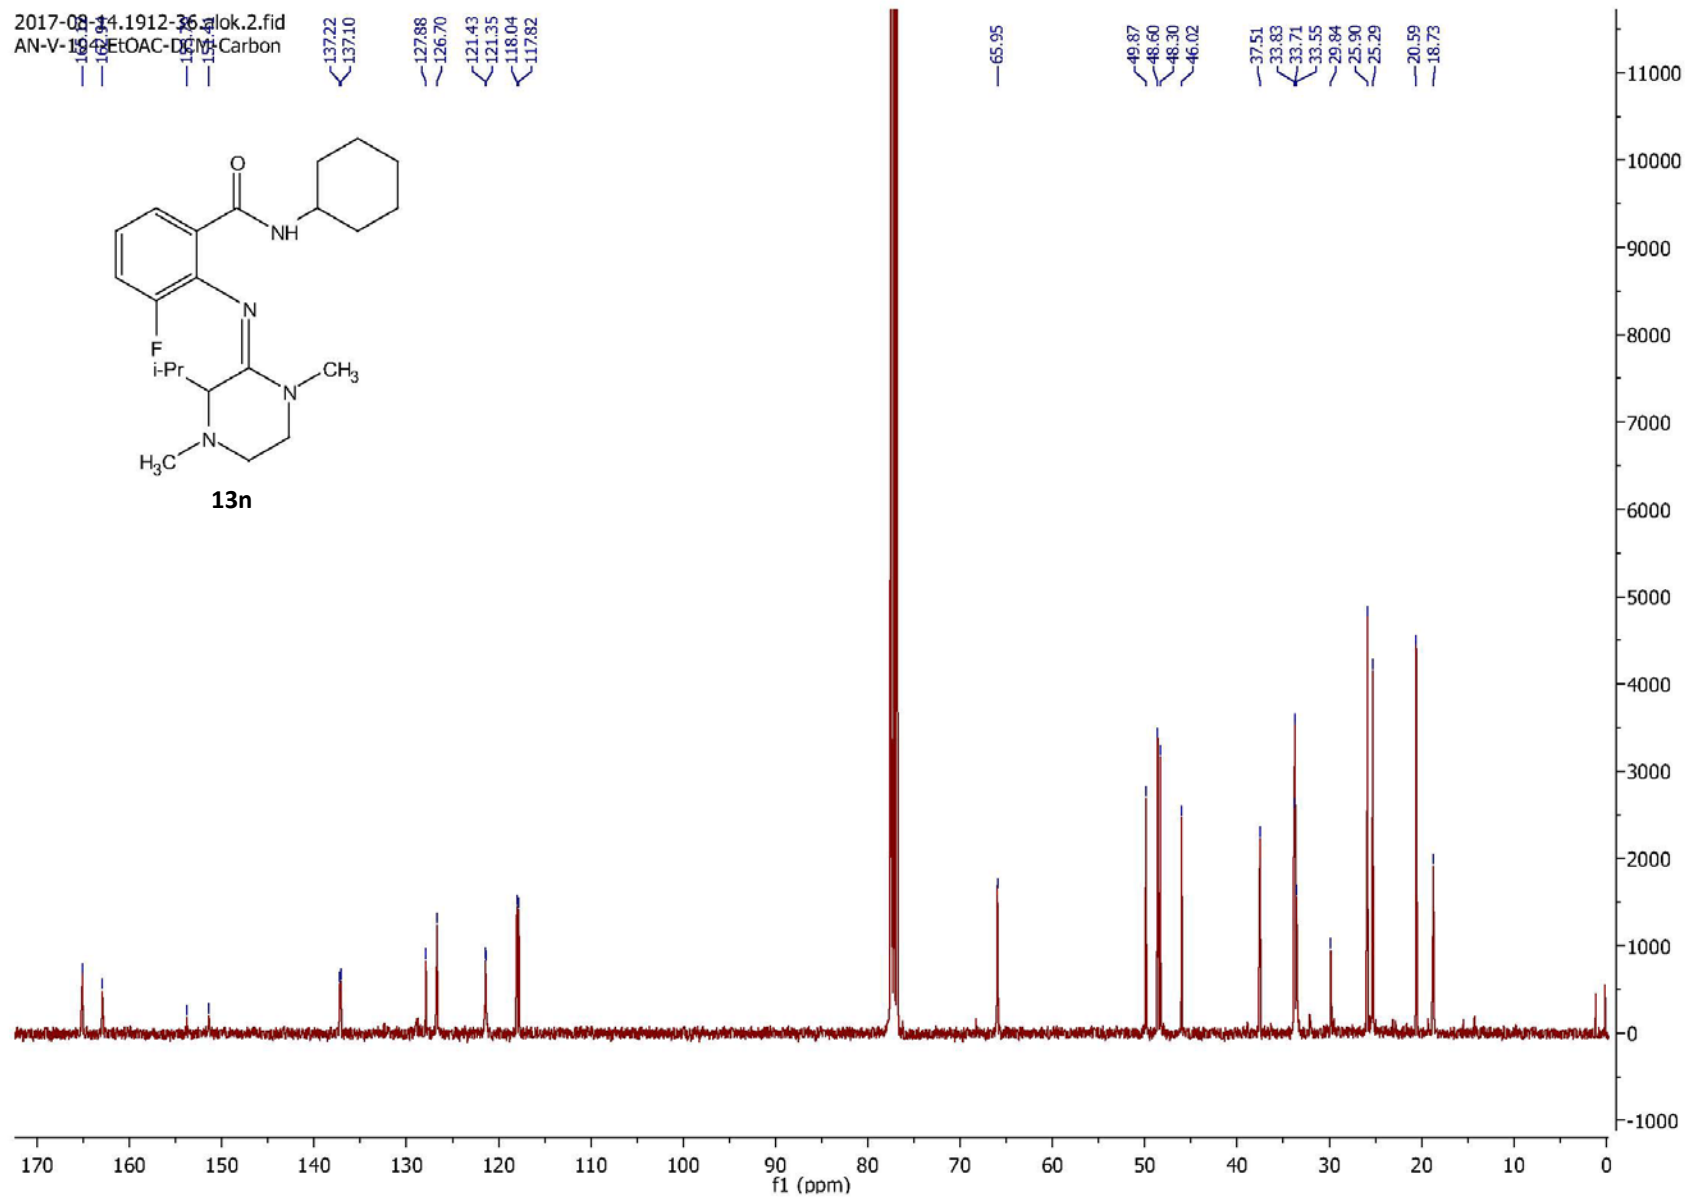



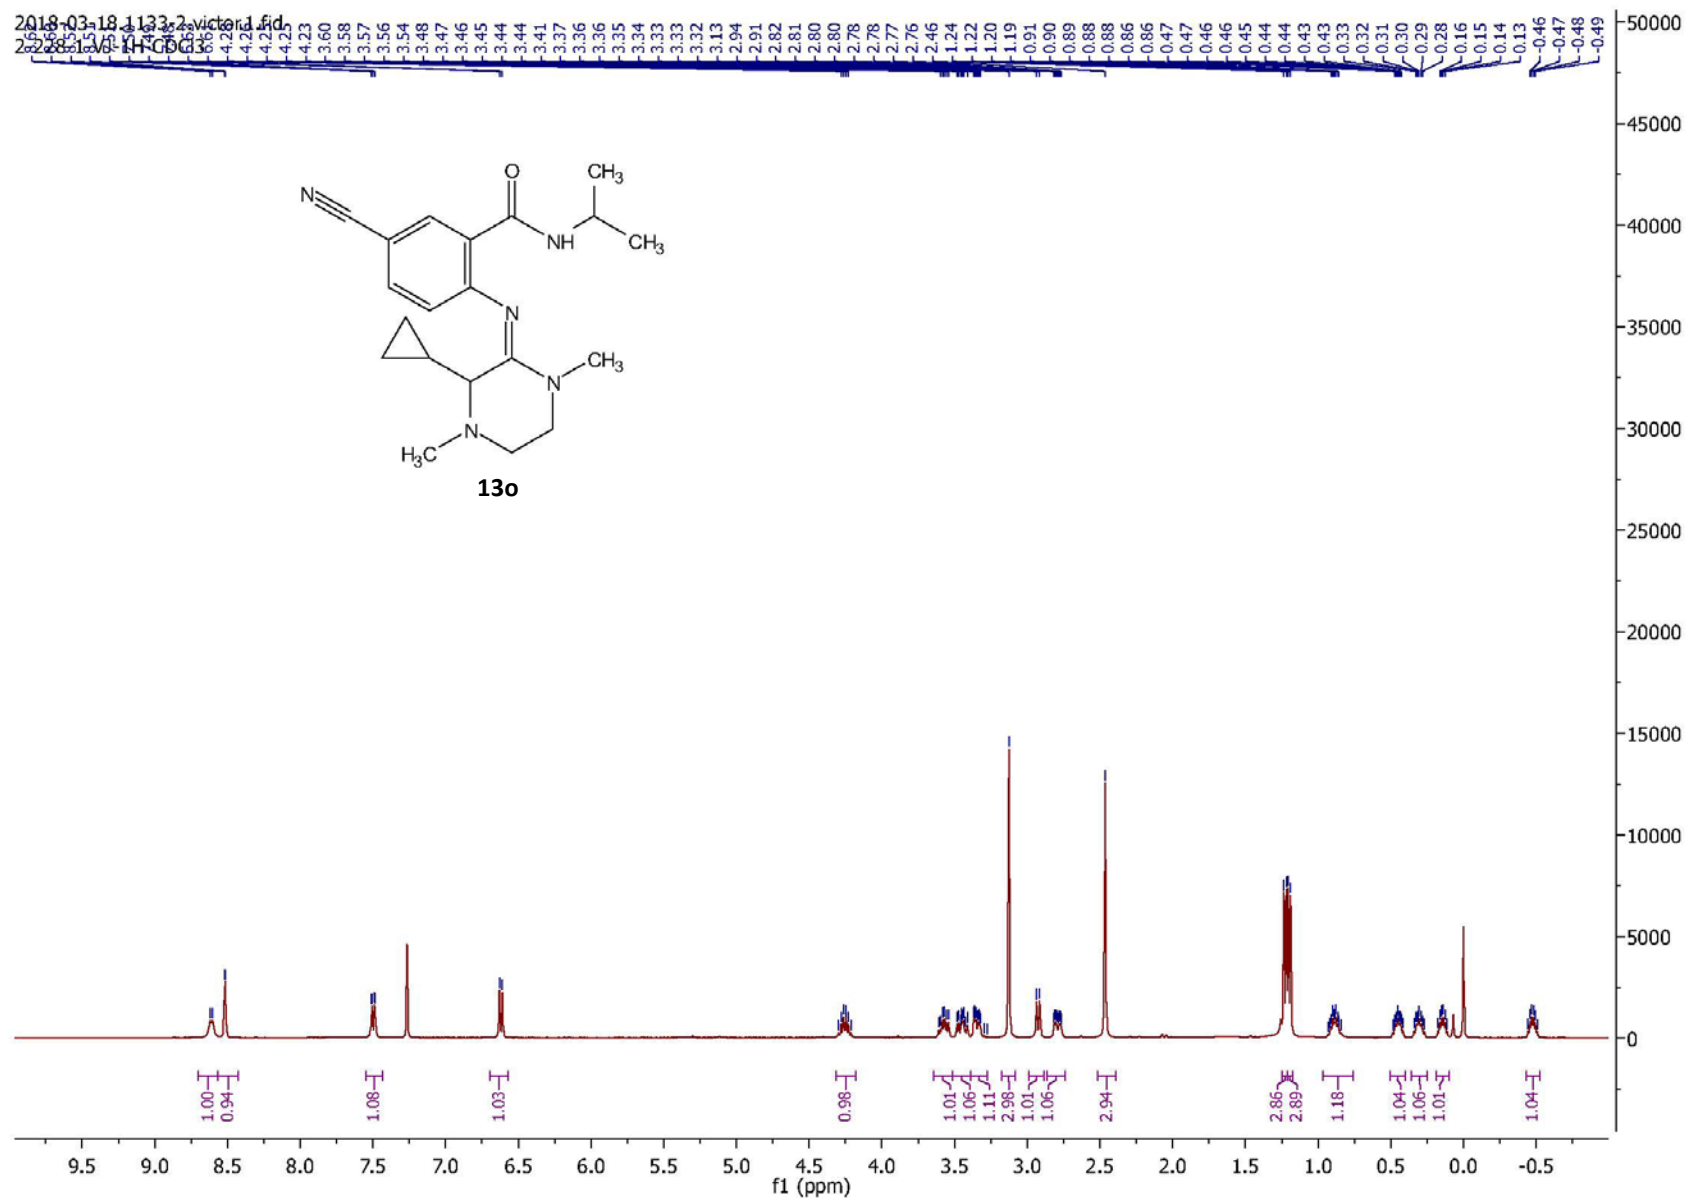

2018-03-18.1133-2.victor.2.fid  
2-228-1-VJ-13C-CDCl3

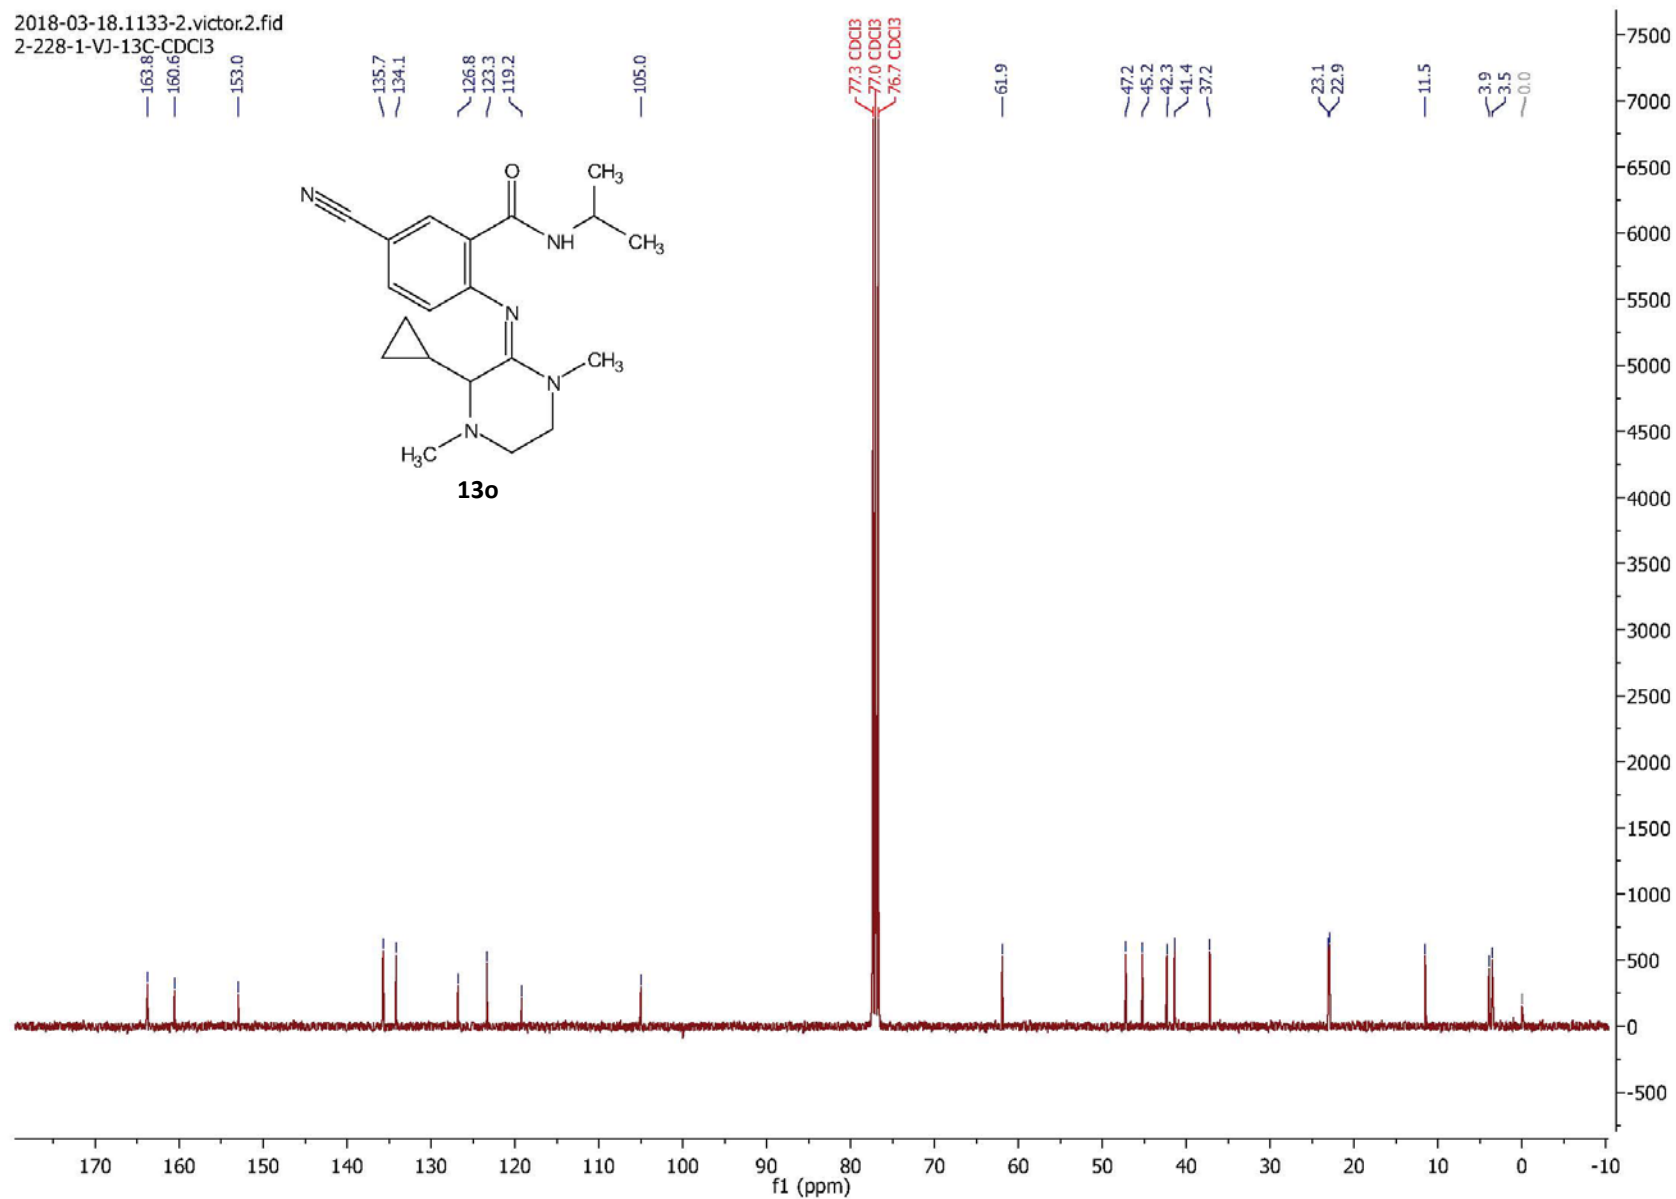

2018-10-22.1203-48.victor.1.fid  
3-73-1-VJ-1H

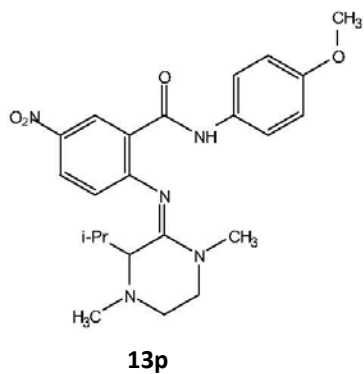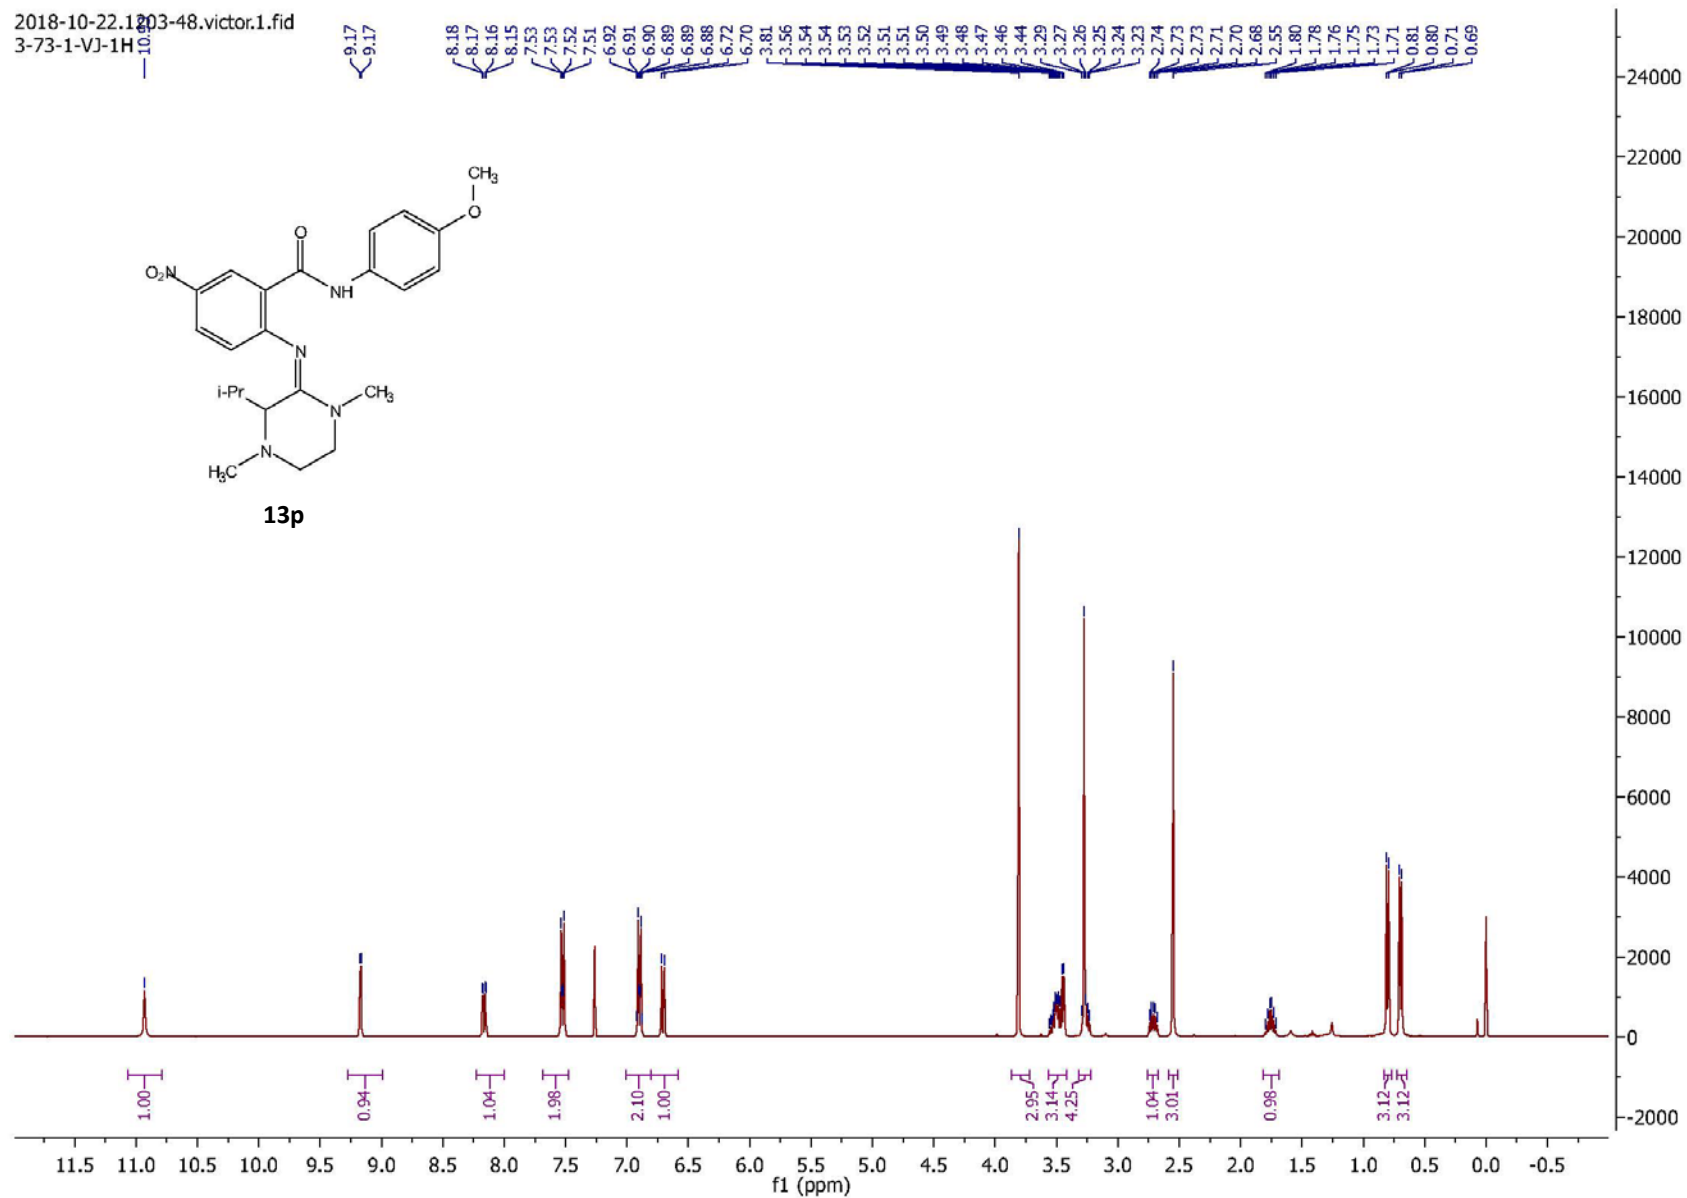

2018-10-22.1203-48.victor.2.fid  
3-73-1-VJ-13C

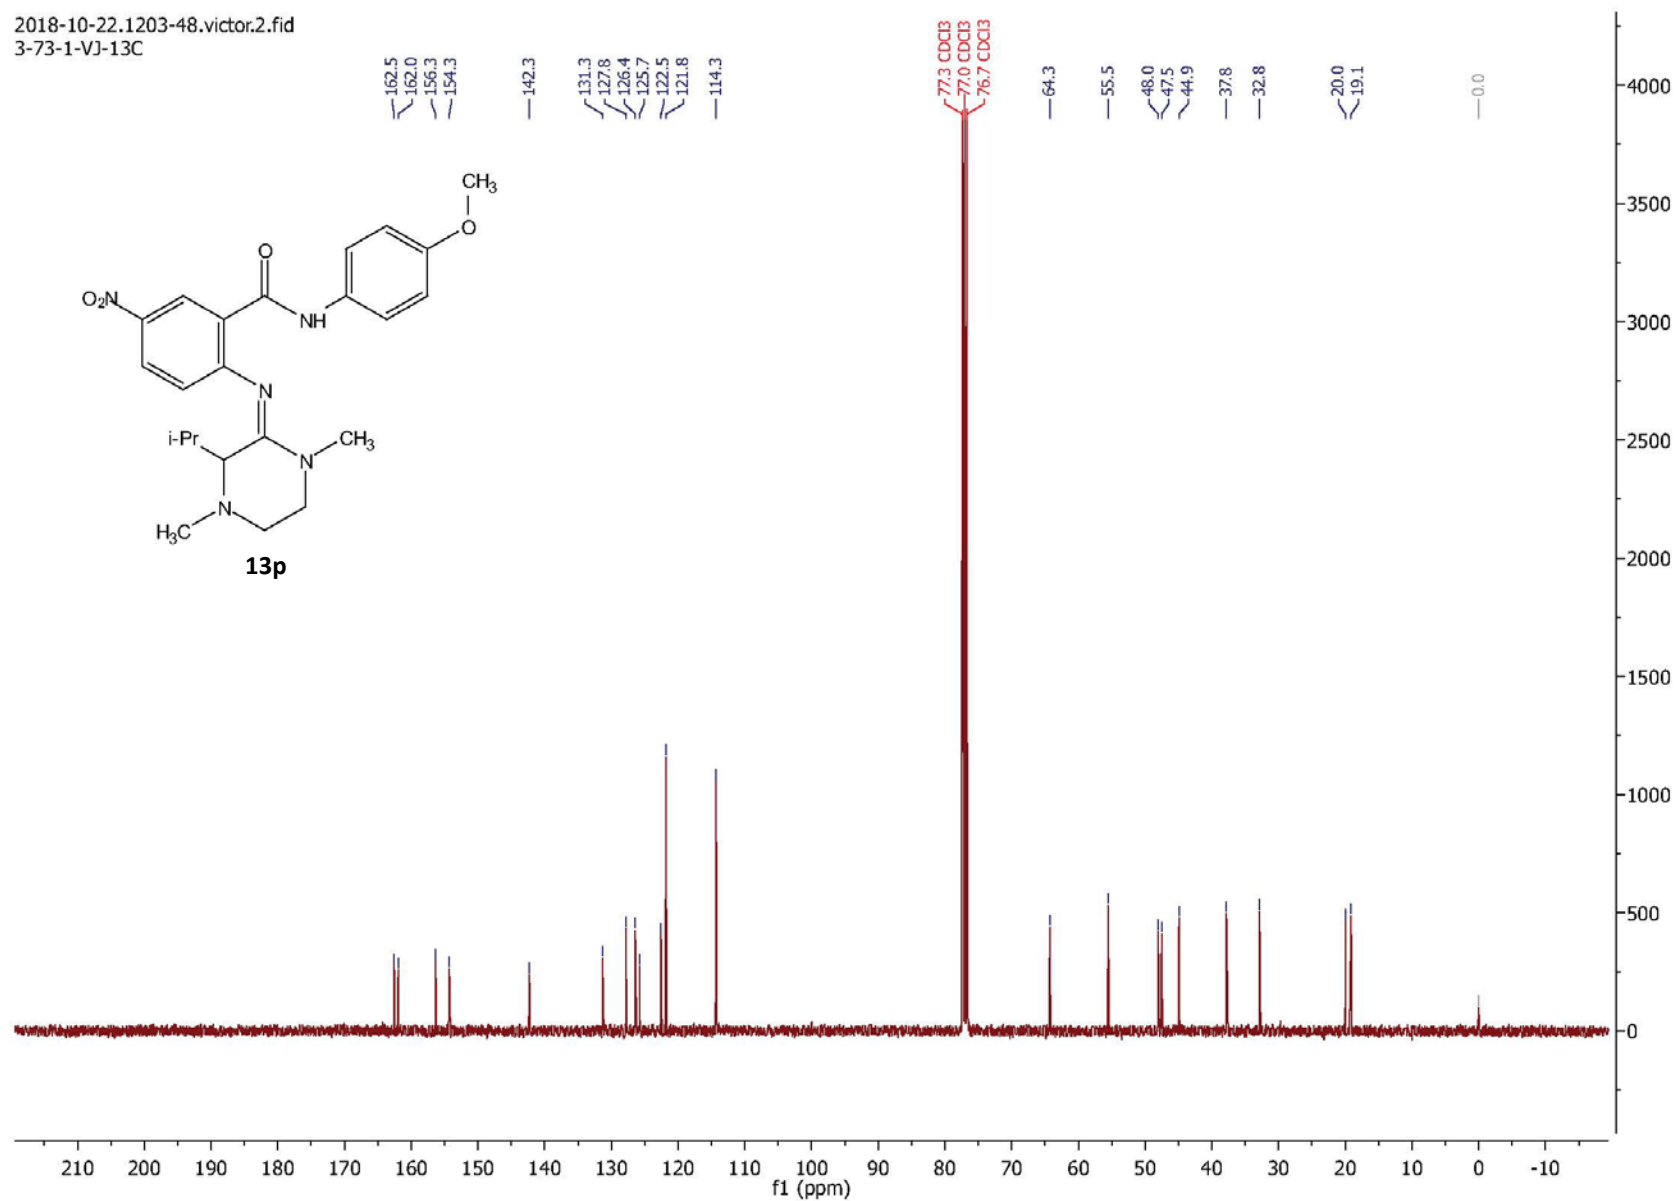

2018-11-06-1042-28.victor1.fid  
3-77-1-VJ-1H

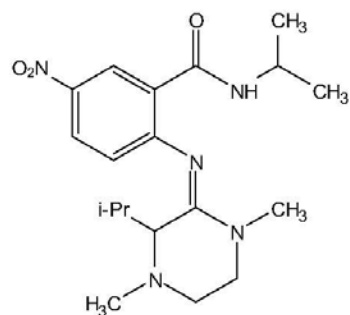

**13q**

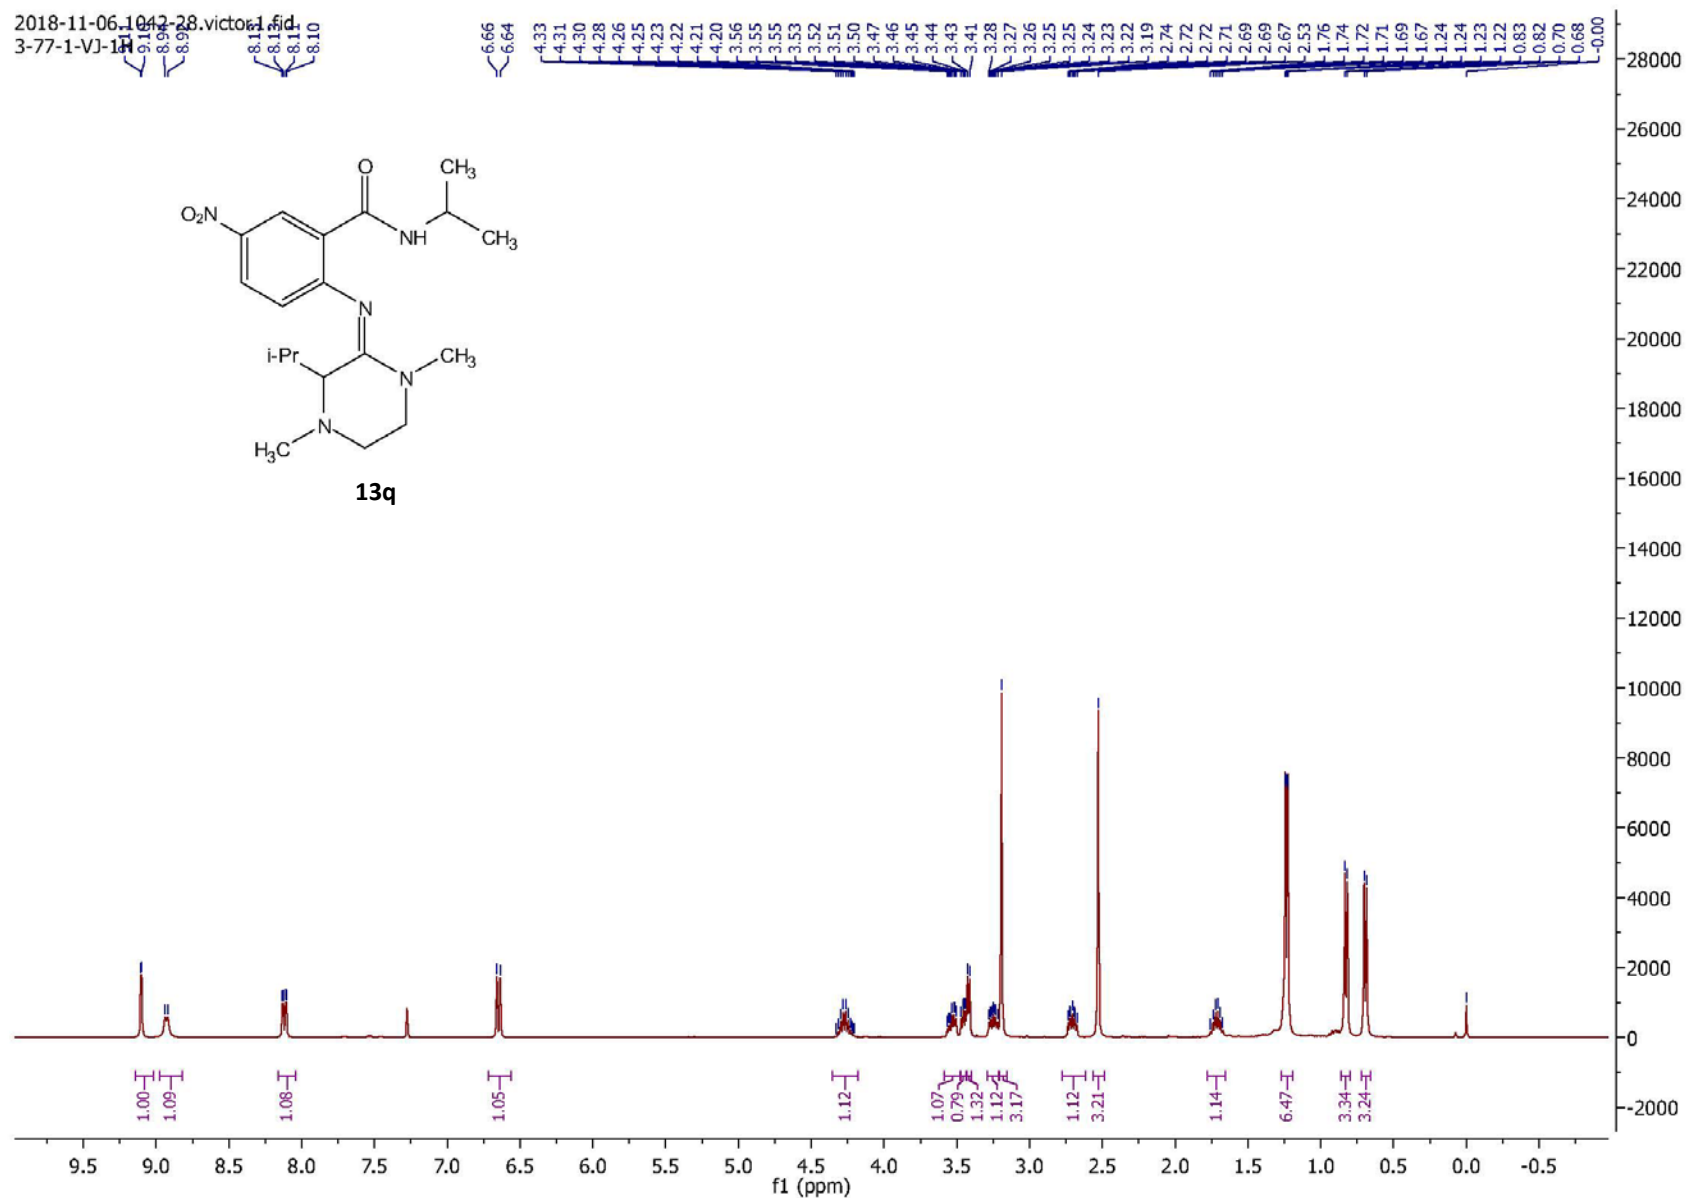

2018-11-06.1042-28.victor.2.fid  
3-77-1-VJ-13C

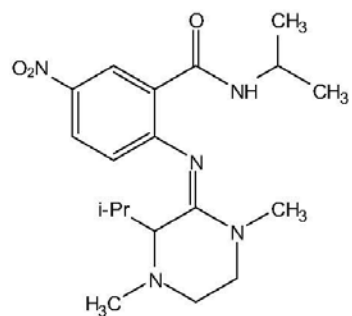

**13q**

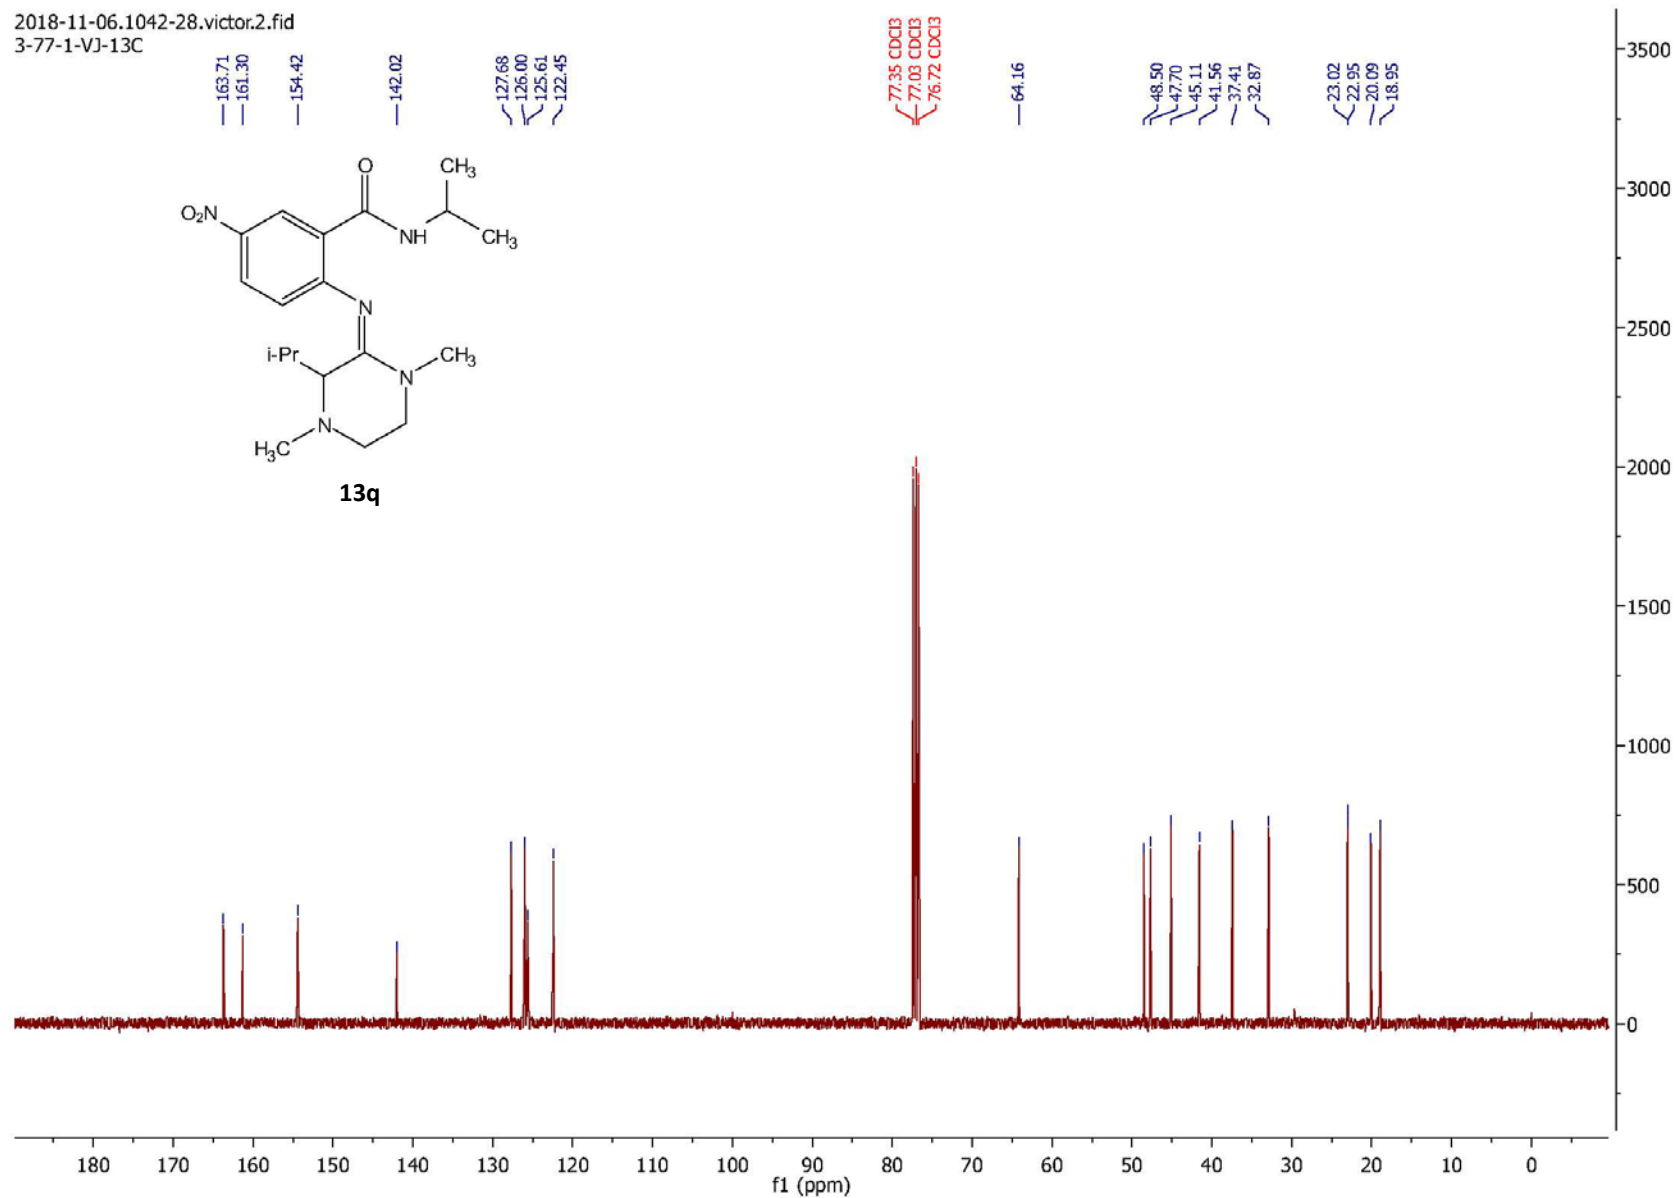

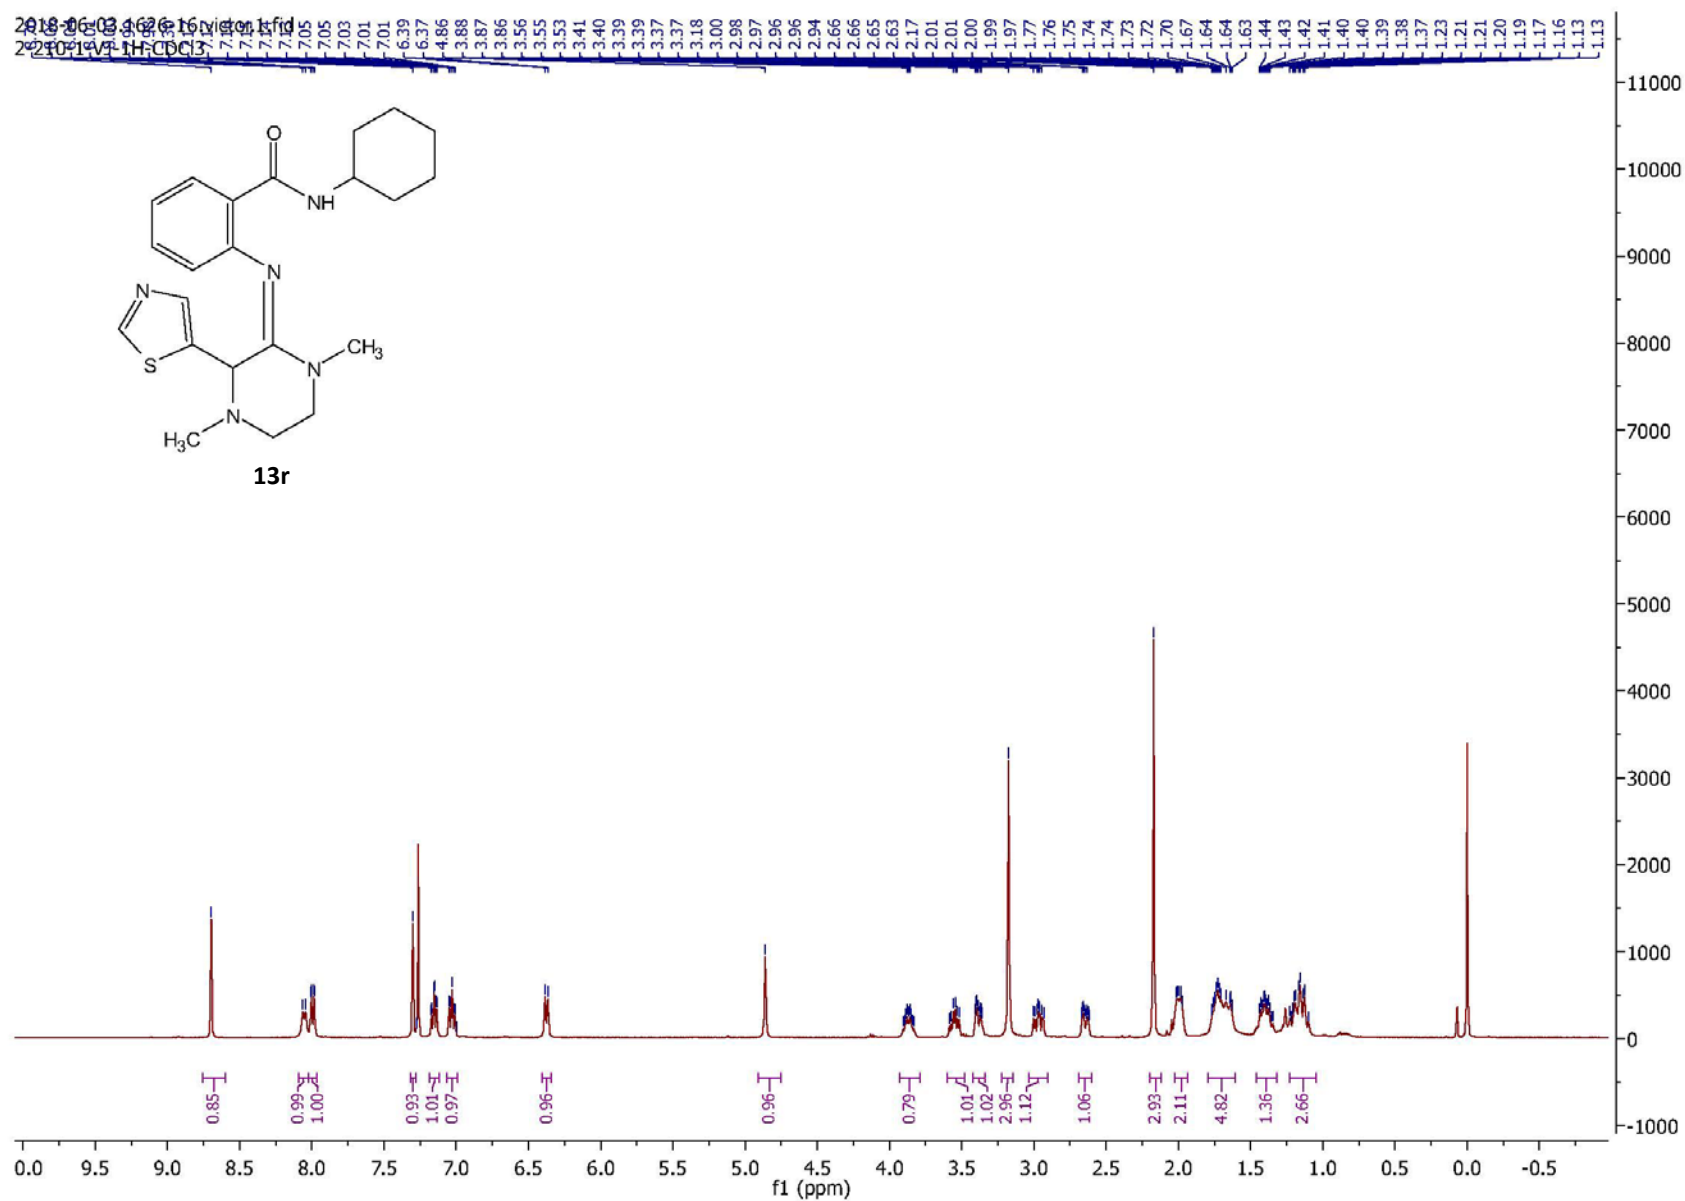

2018-06-03.1626-16.victor.4.fid  
2-210-1-VJ-13C-CDCl3

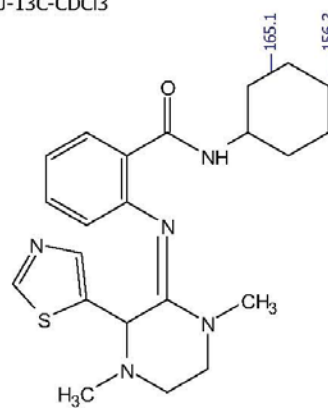

**13r**

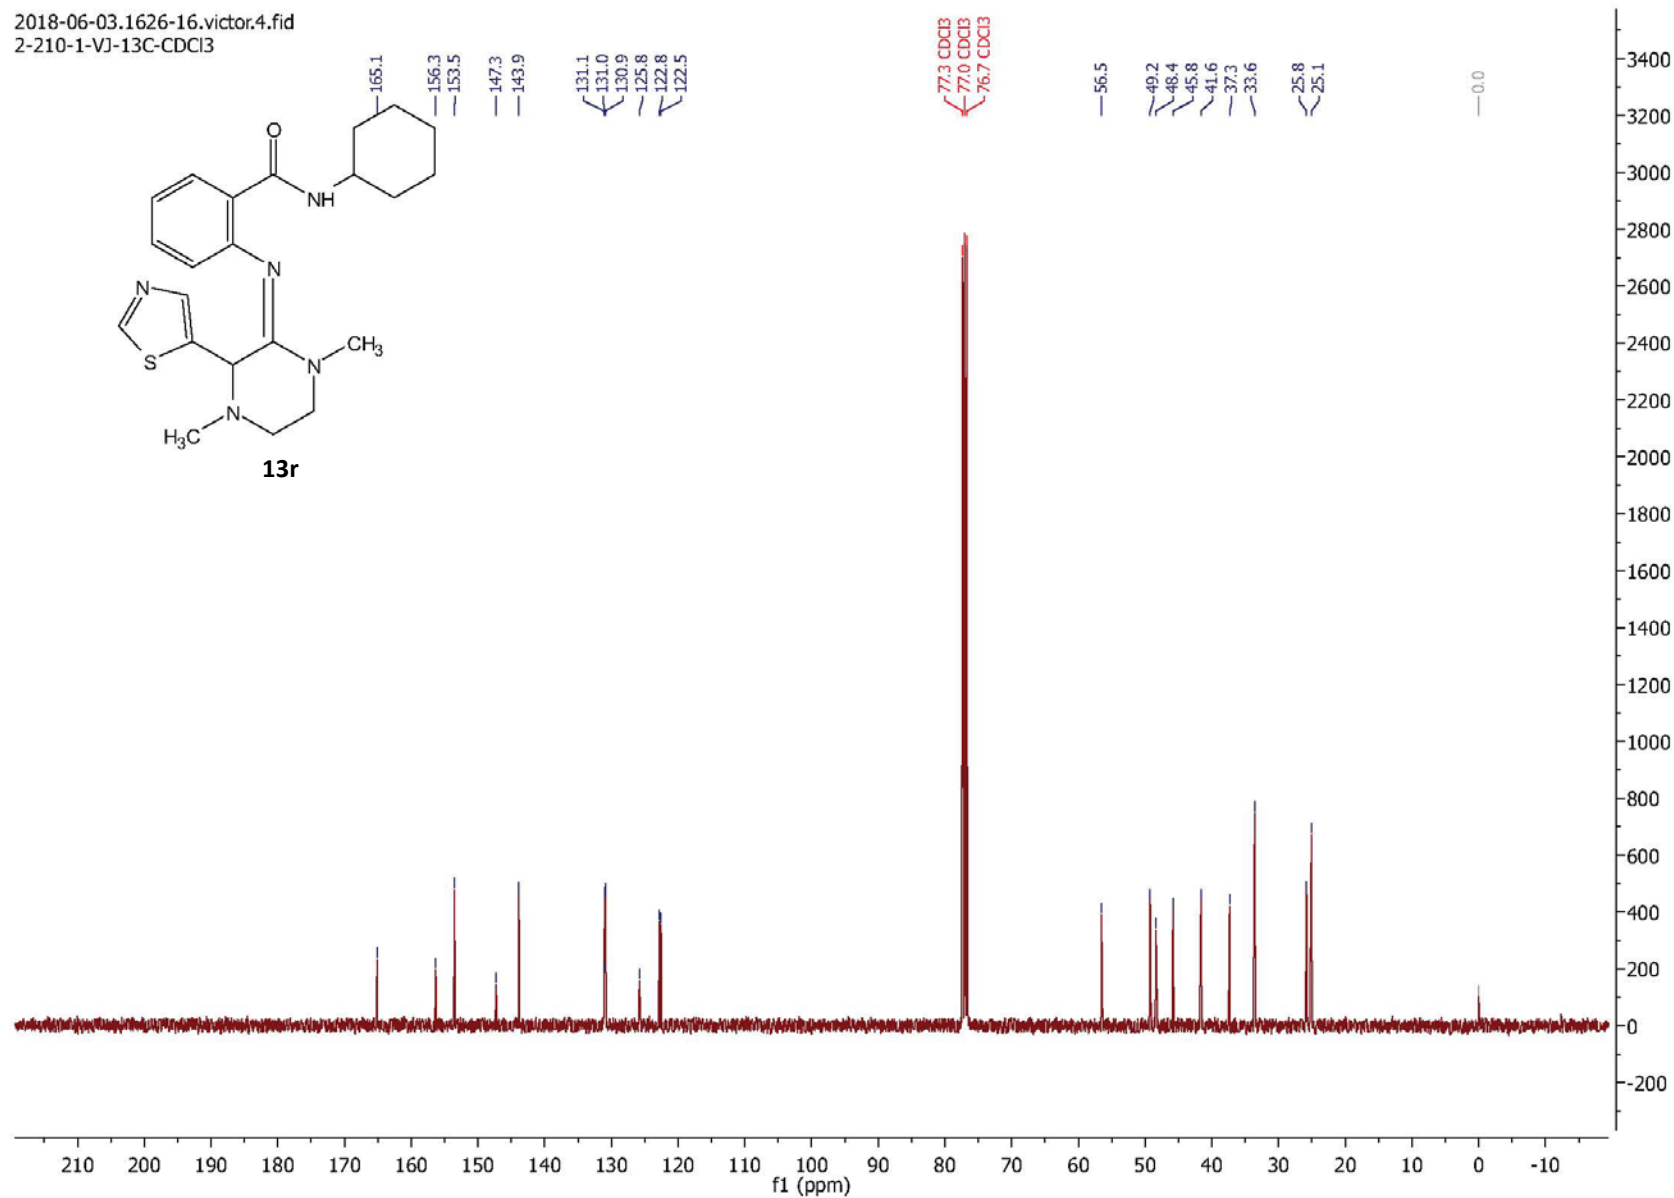



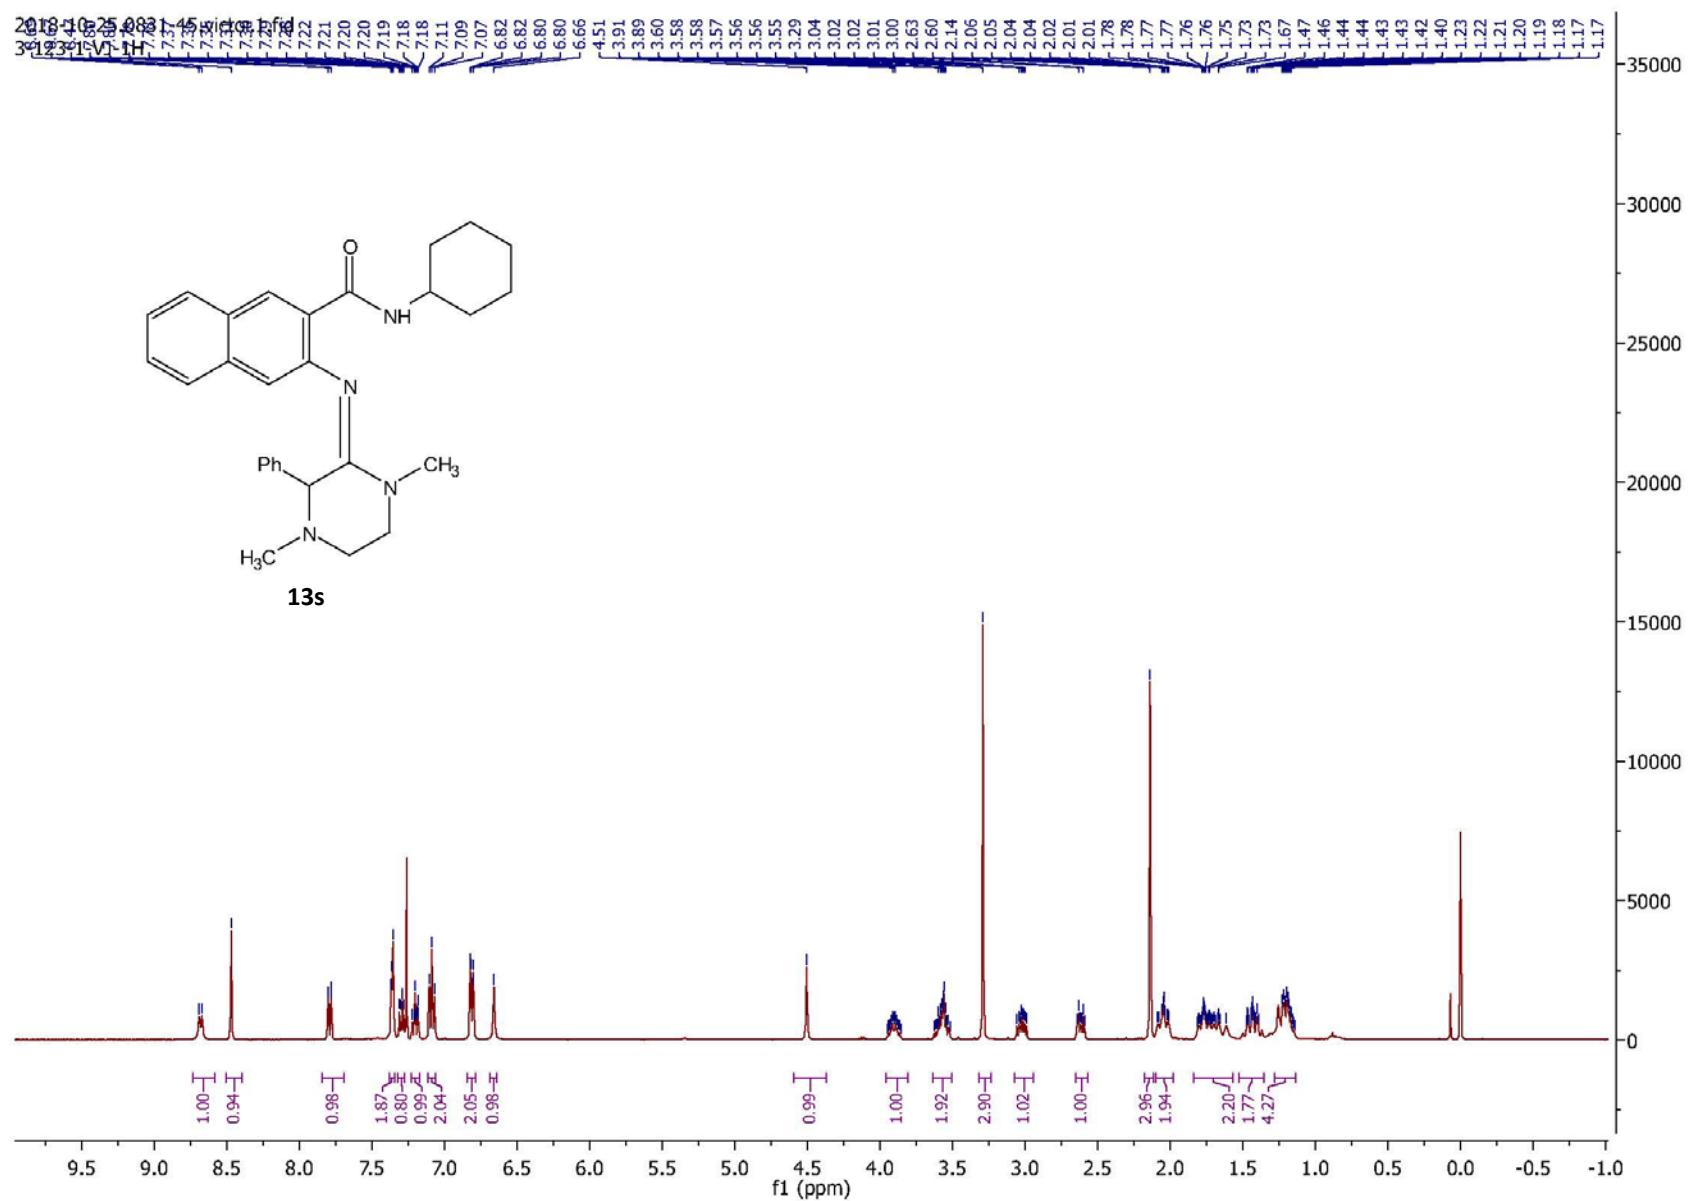

2018-10-25.0831-45.victor.2.fid  
3-123-1-VJ-13C

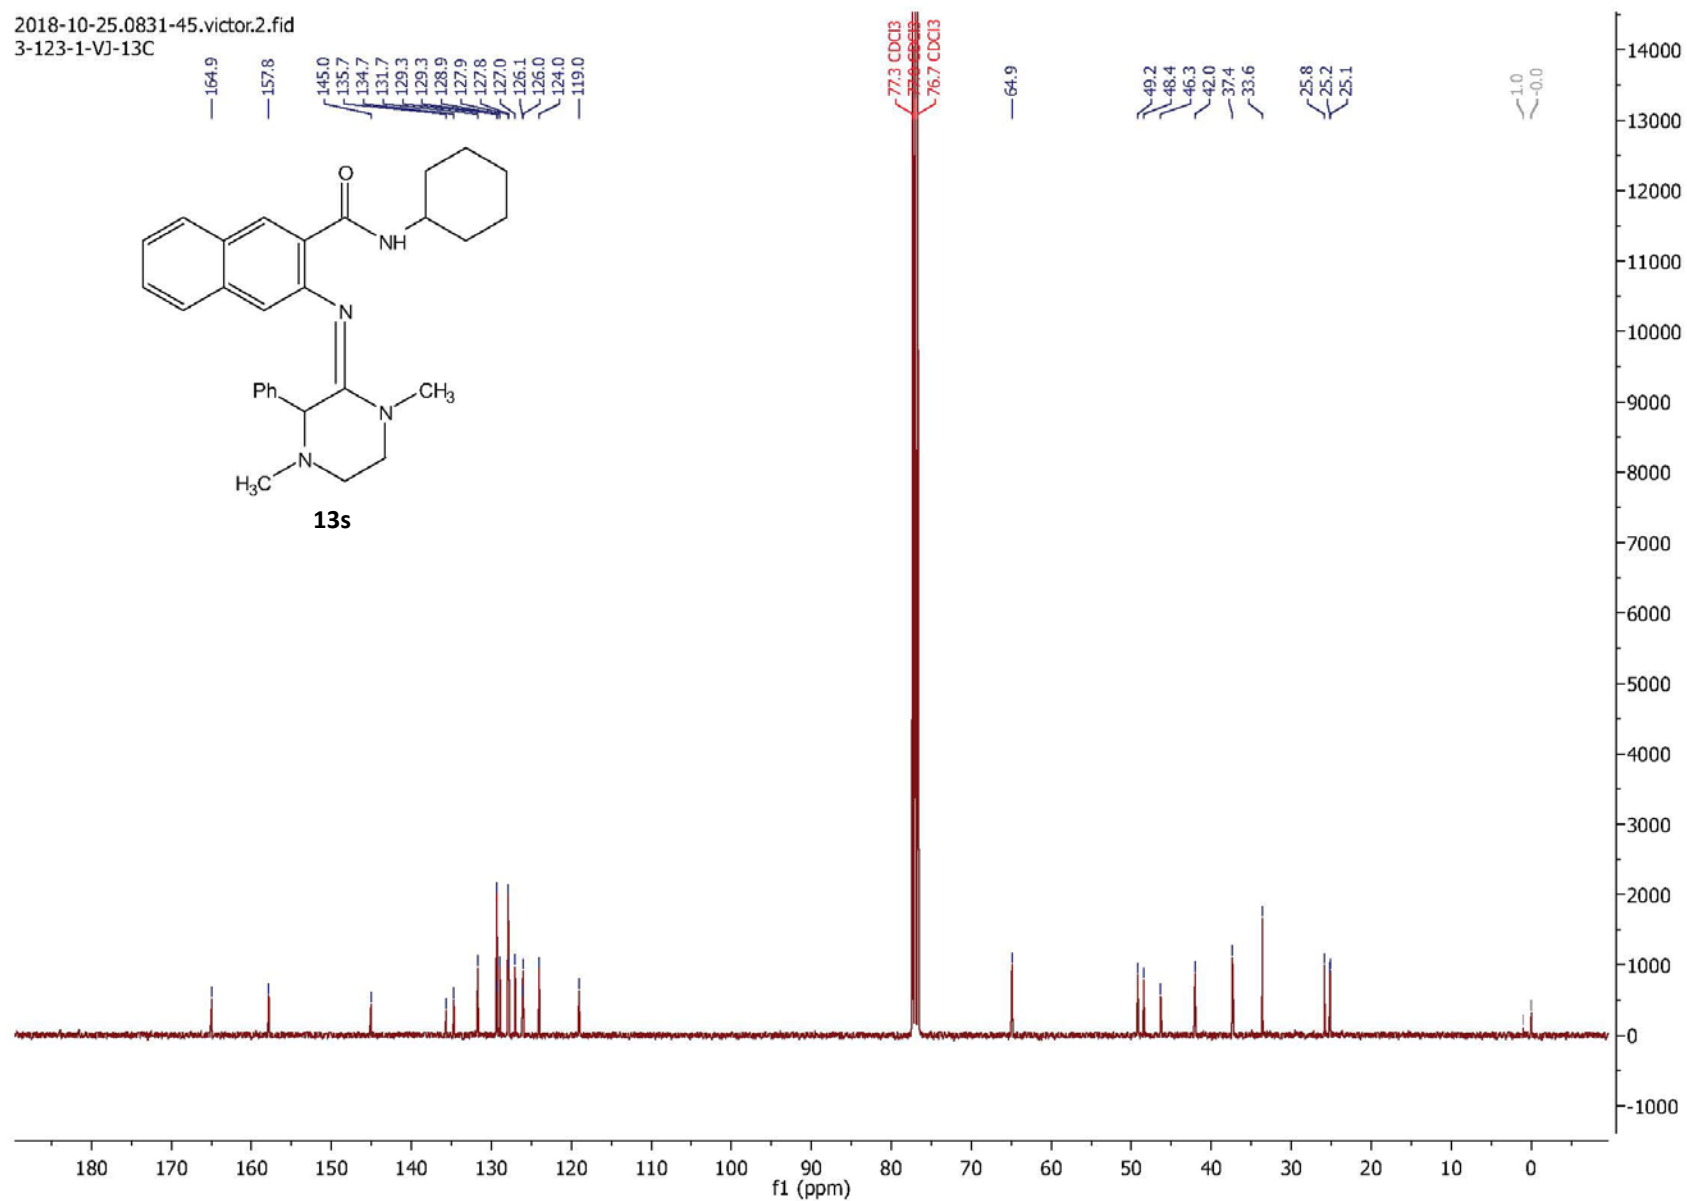



2018-10-17.1016-1.victor.2.fid  
3-122-1-VJ-13C

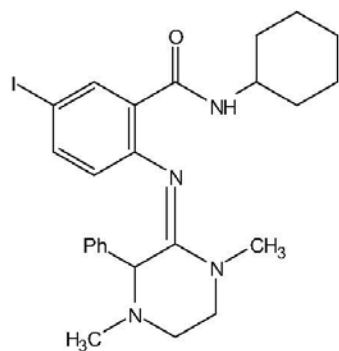

**13t**

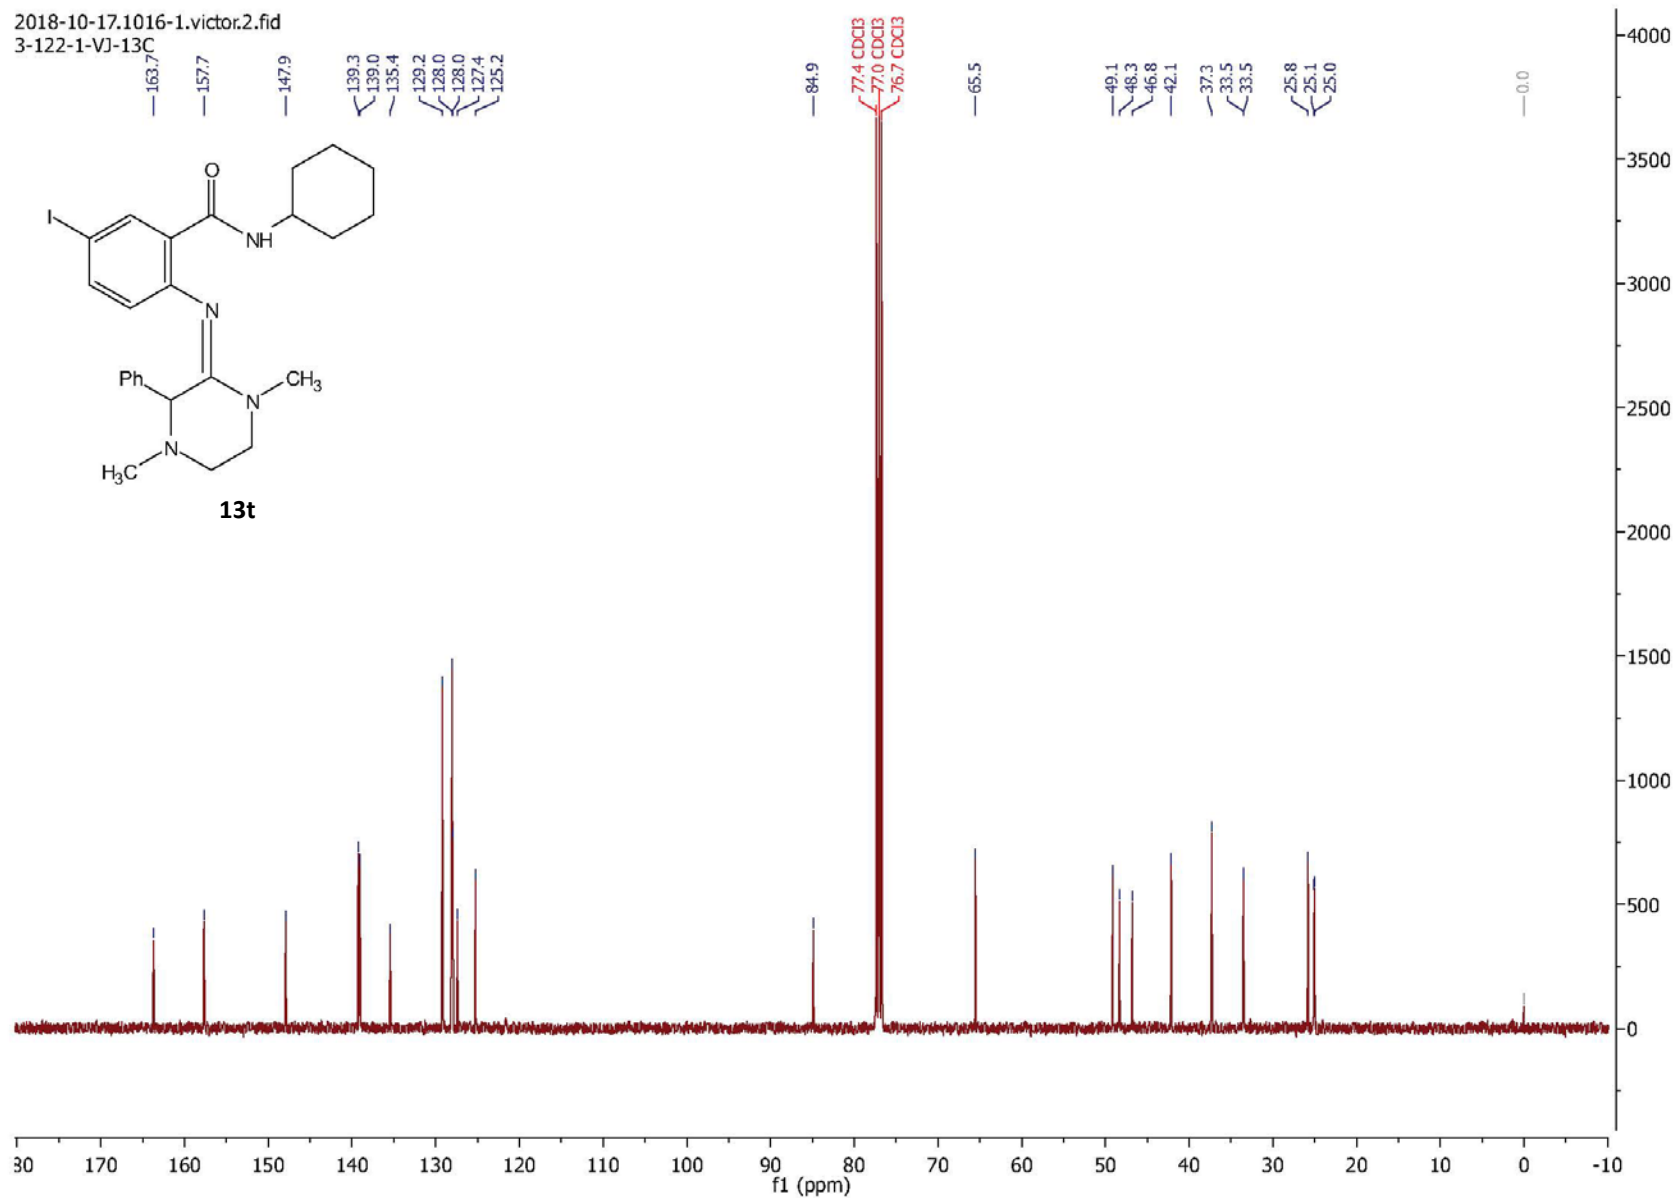

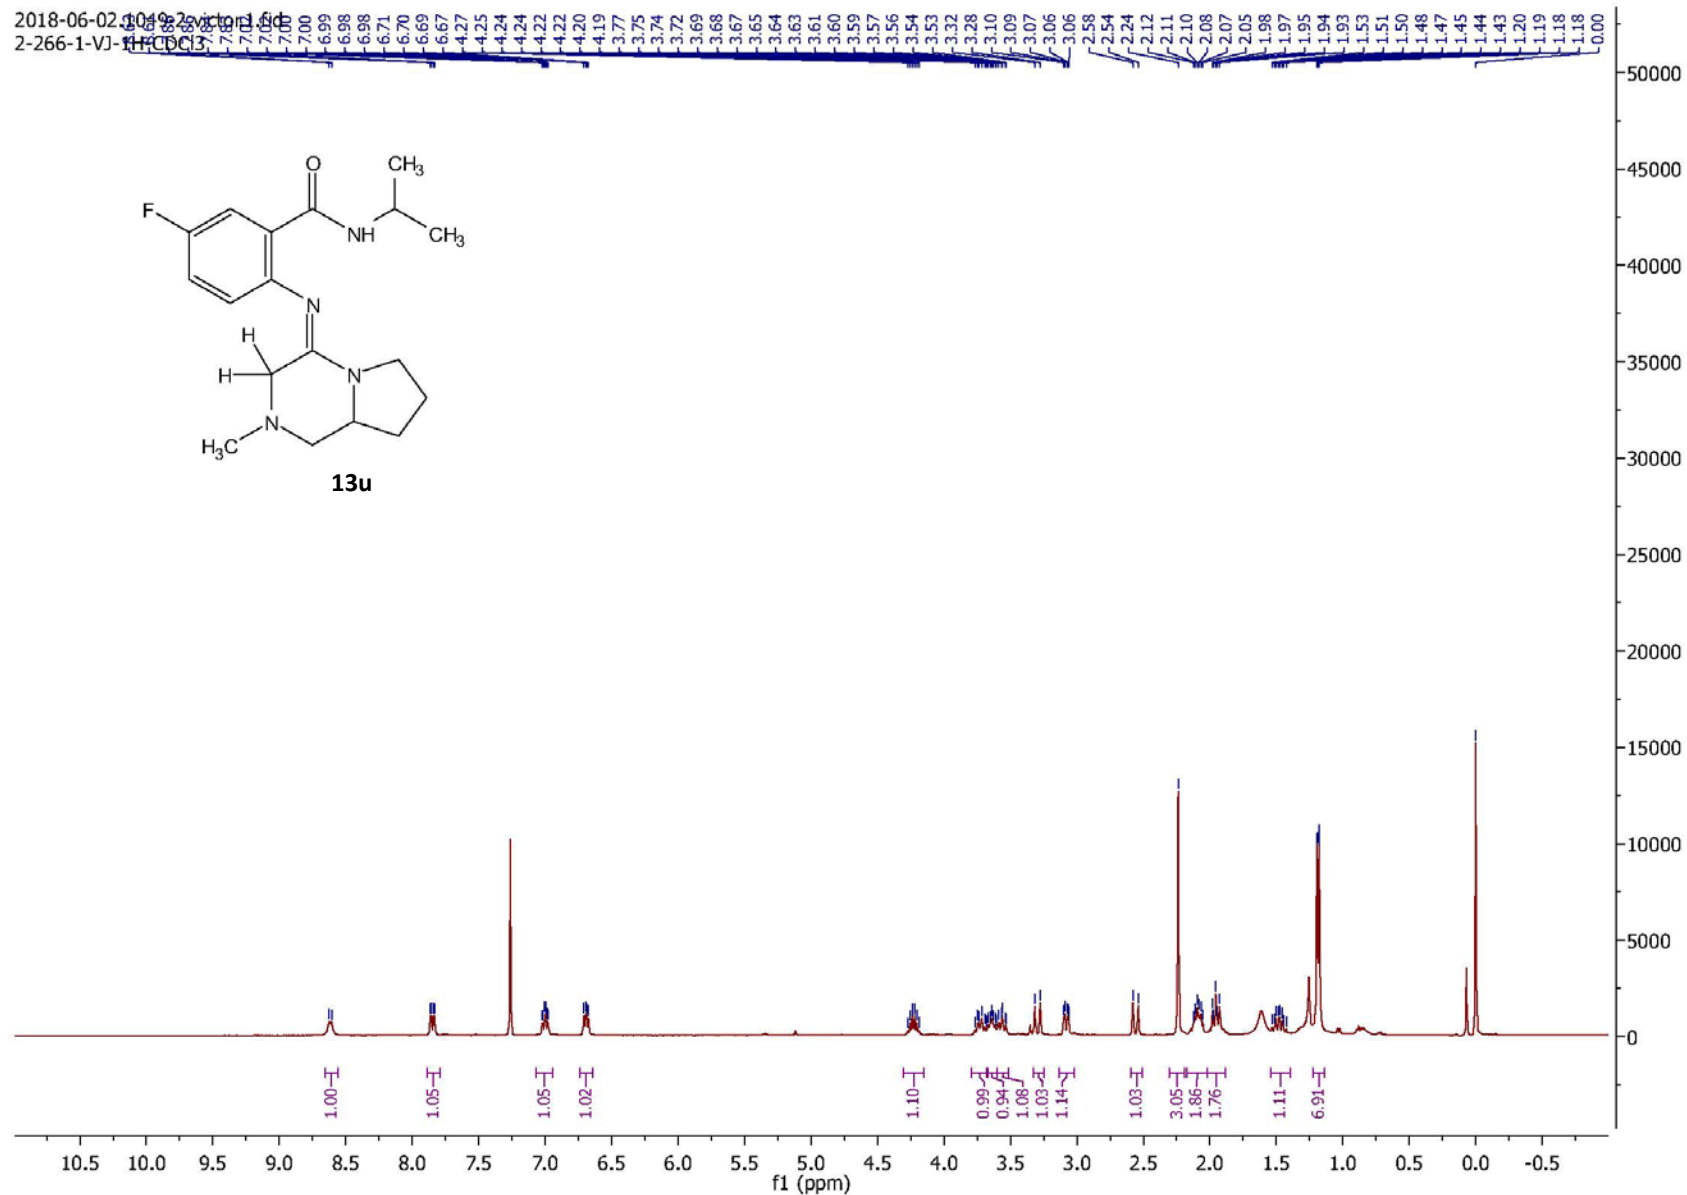

2018-04-22.1059-34.victor.2.fid  
2-266-1-VJ-19F-CDCl3

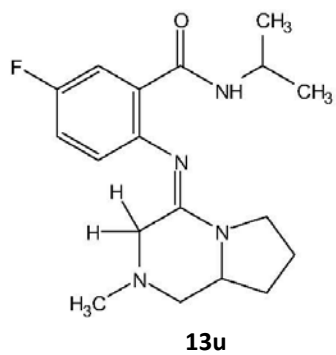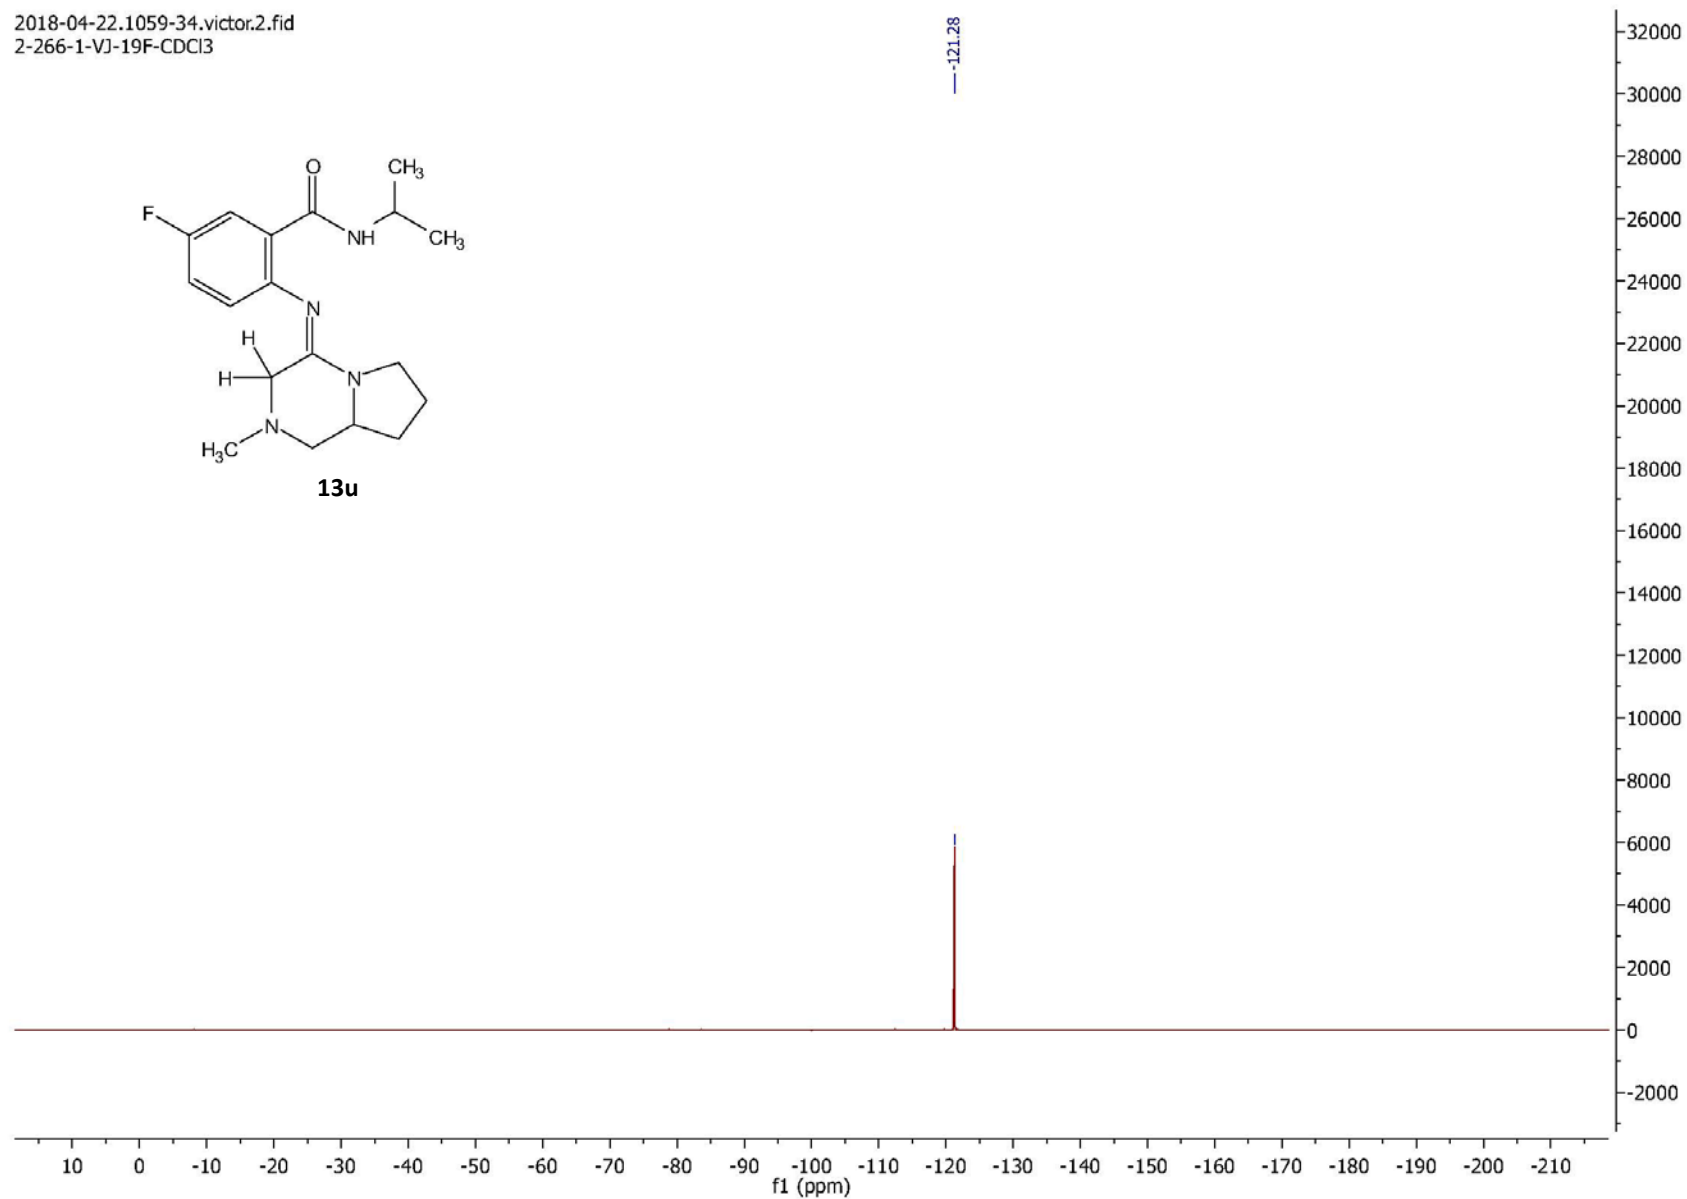

2018-04-22.1059-34.victor.3.fid  
2-266-1-VJ-13C-CDCl3

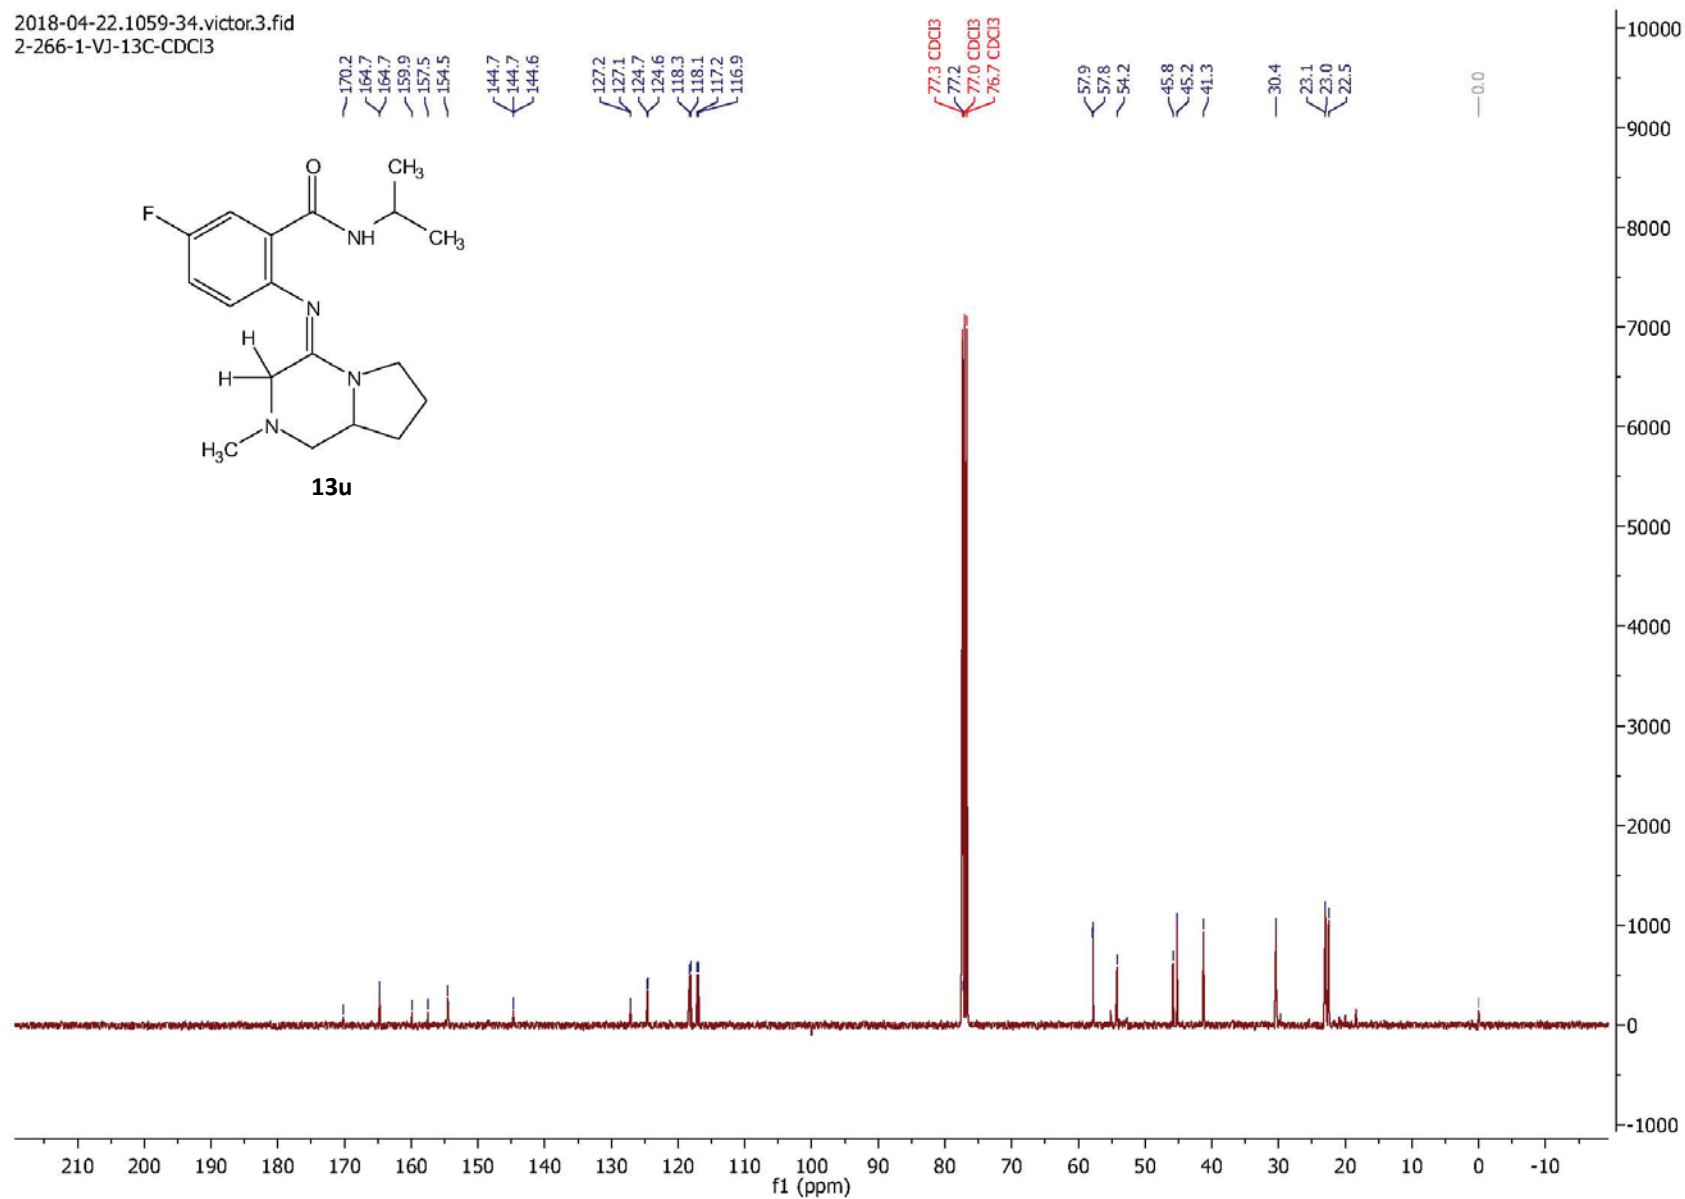

2018-02-16-1011-1.victor.1.fid  
2-191-1-VJ-1H-CDCI3

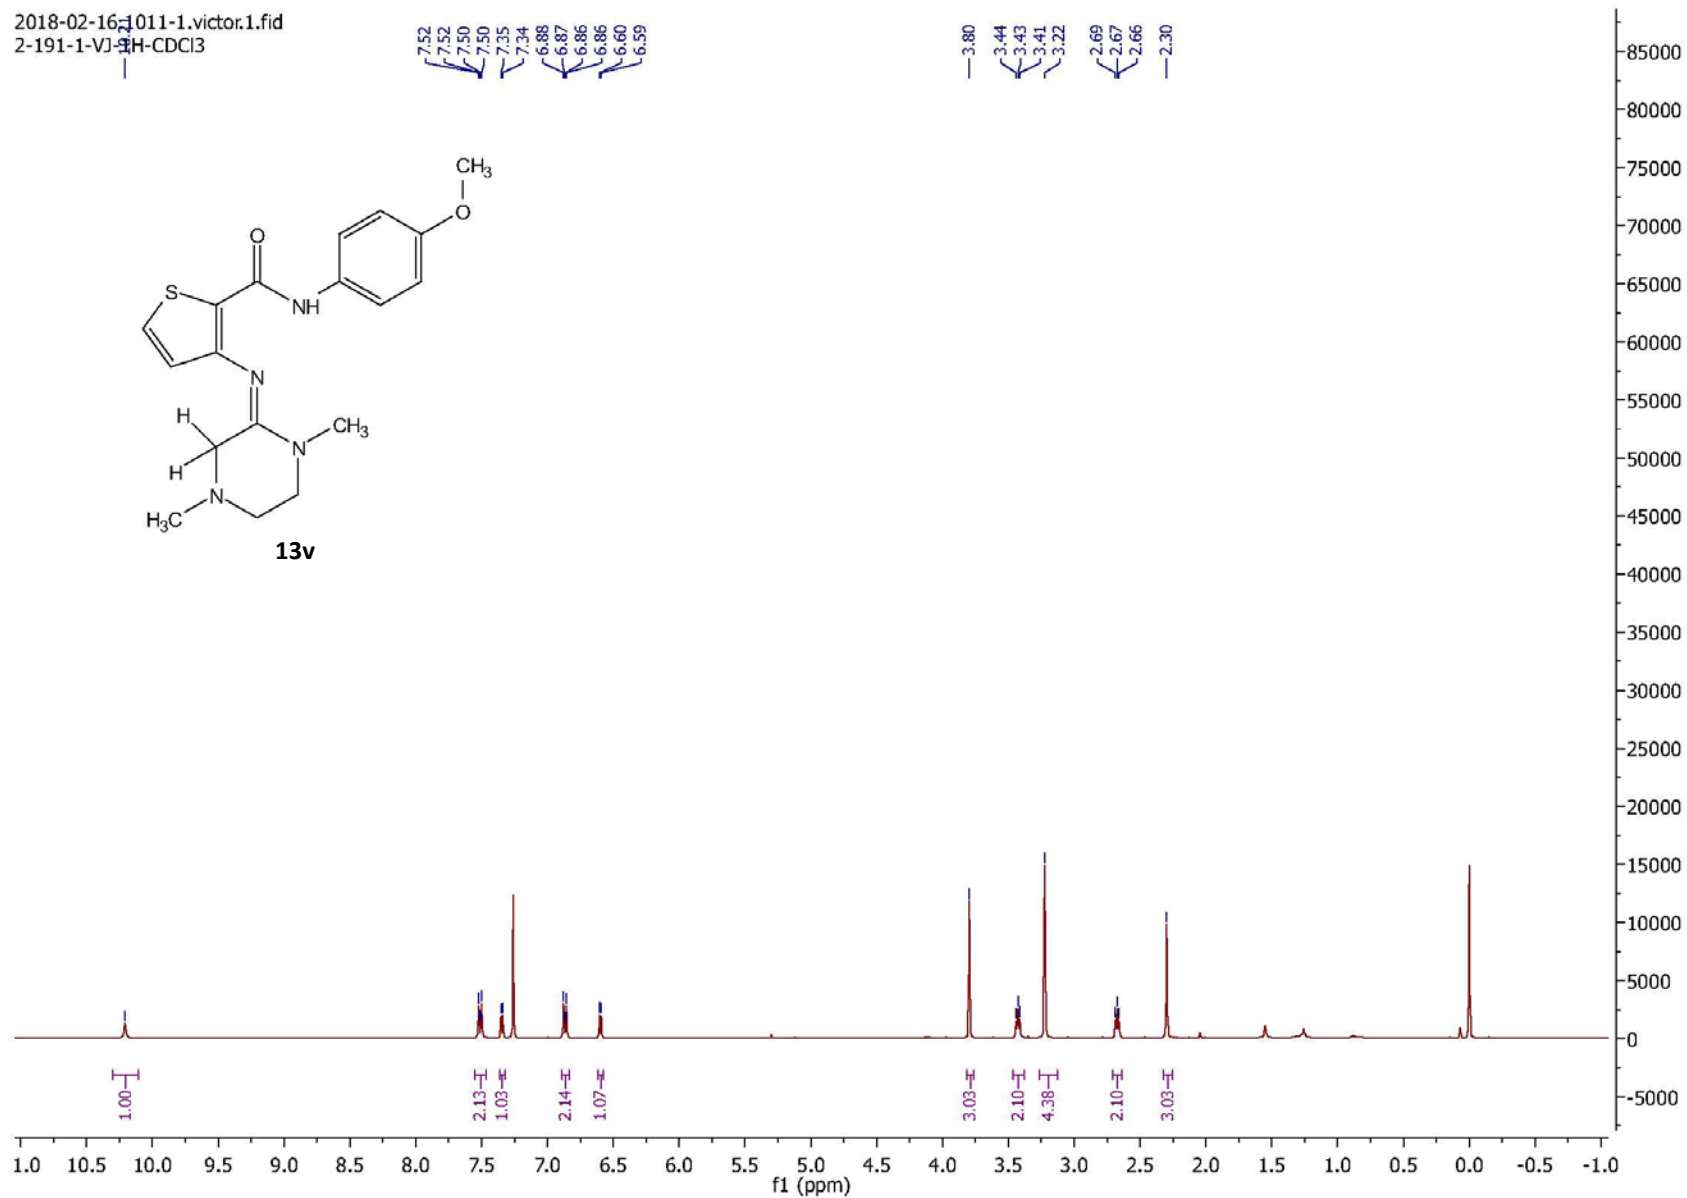



2018-02-16.1011-1.victor.2.fid  
2-191-1-VJ-1H-CDCl3

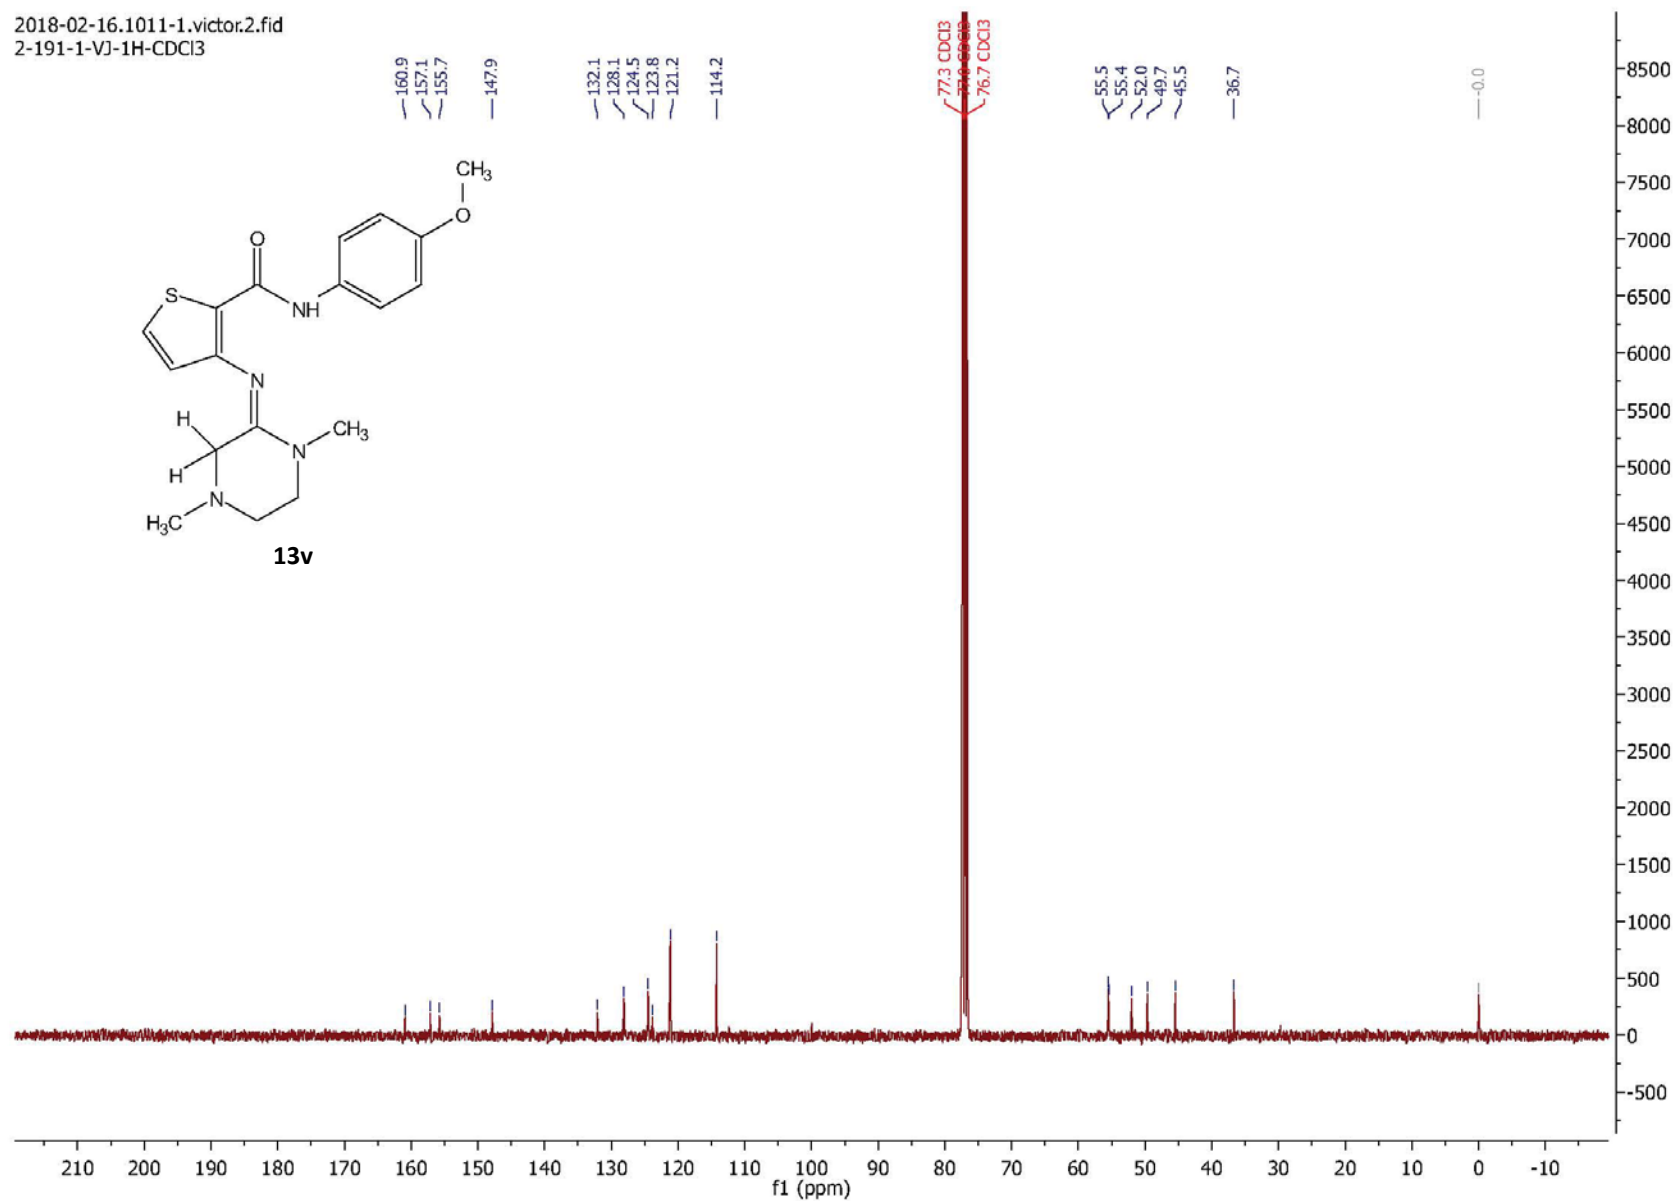

2018-05-31.1955-1.victor.1.fid  
2-56-1-VJ-1H-CDCl3

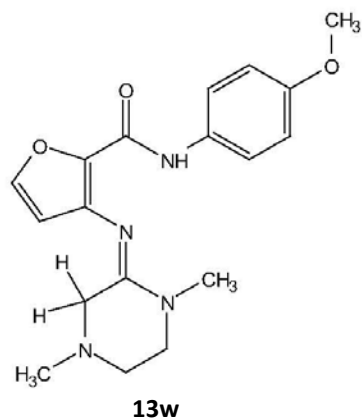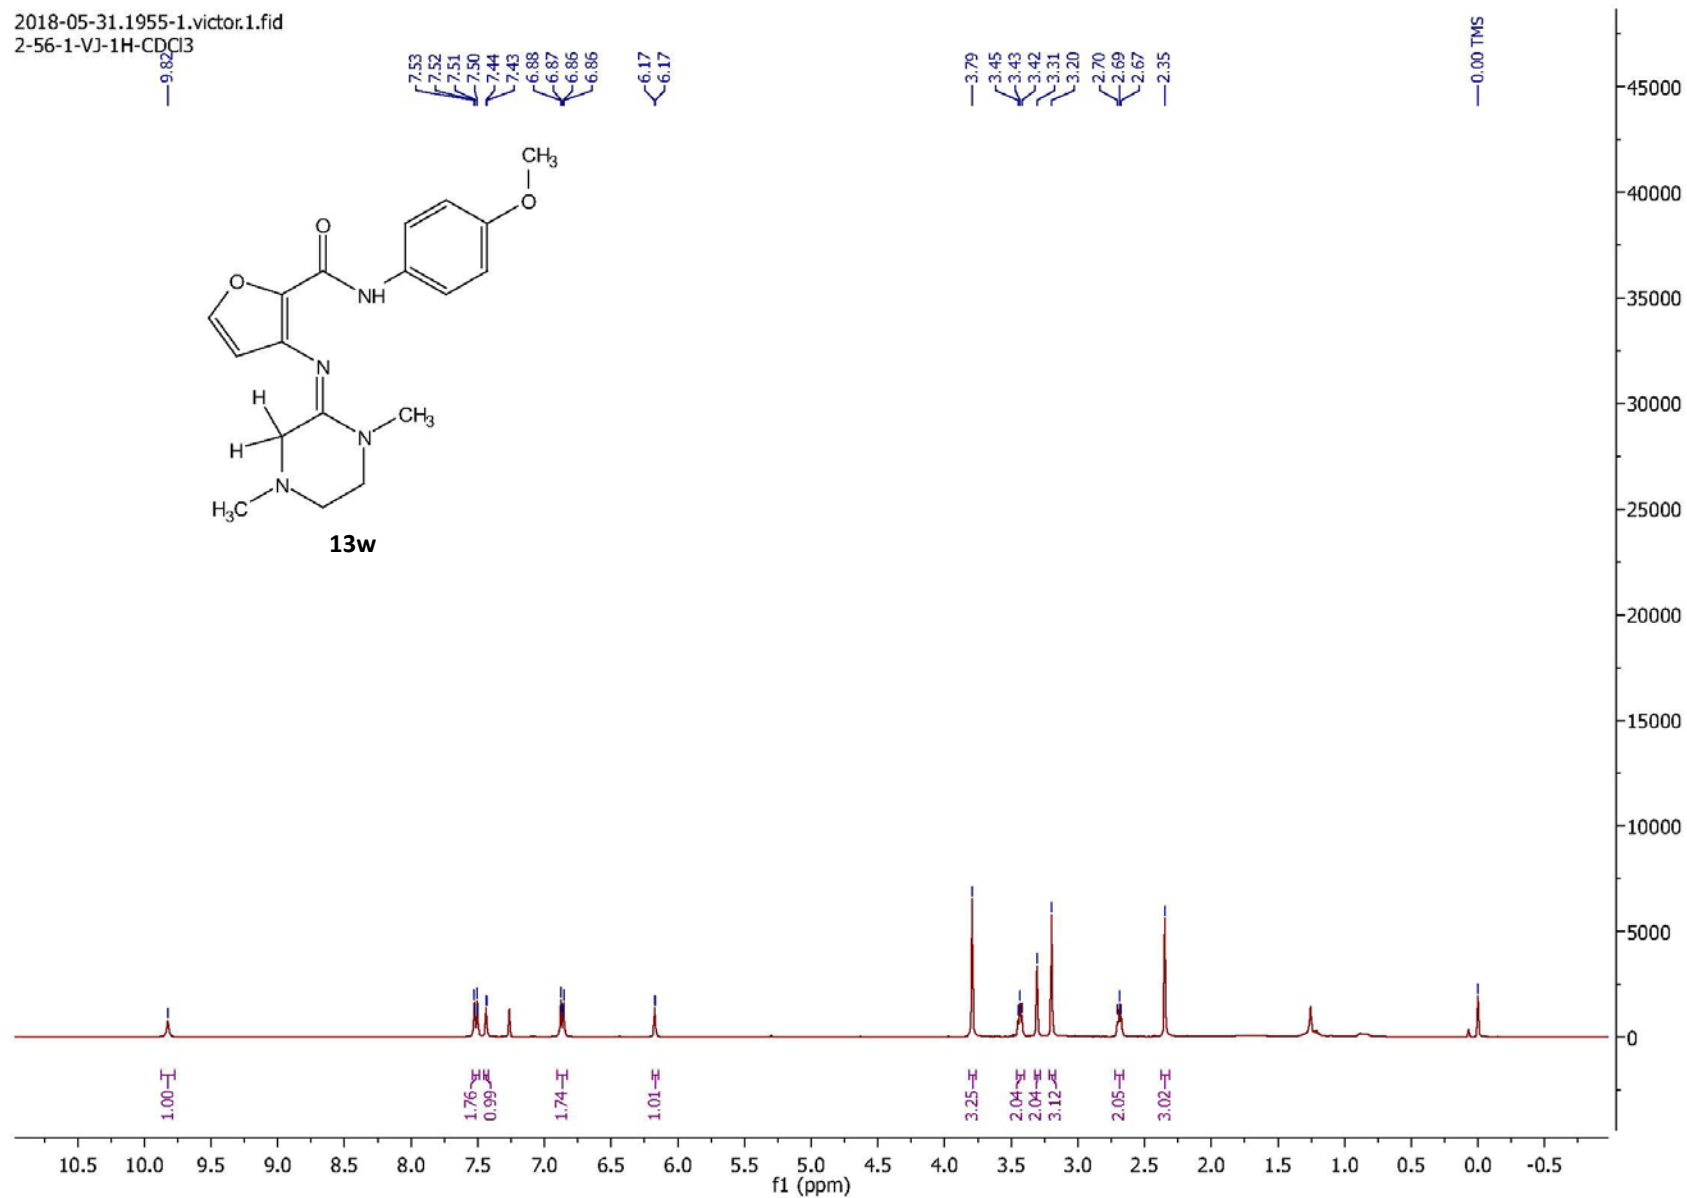

2018-05-31.1955-1.victor.2.fid  
2-56-1-VJ-13C-CDCl3

157.7  
157.5  
155.7  
143.8  
137.5  
136.7  
132.0  
121.2  
114.2  
108.9

77.3 CDCl3  
77.0 CDCl3  
76.7 CDCl3

55.5  
55.4  
51.8  
49.7  
45.5

36.9

0.0

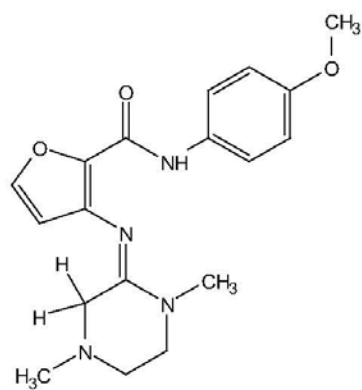

**13w**

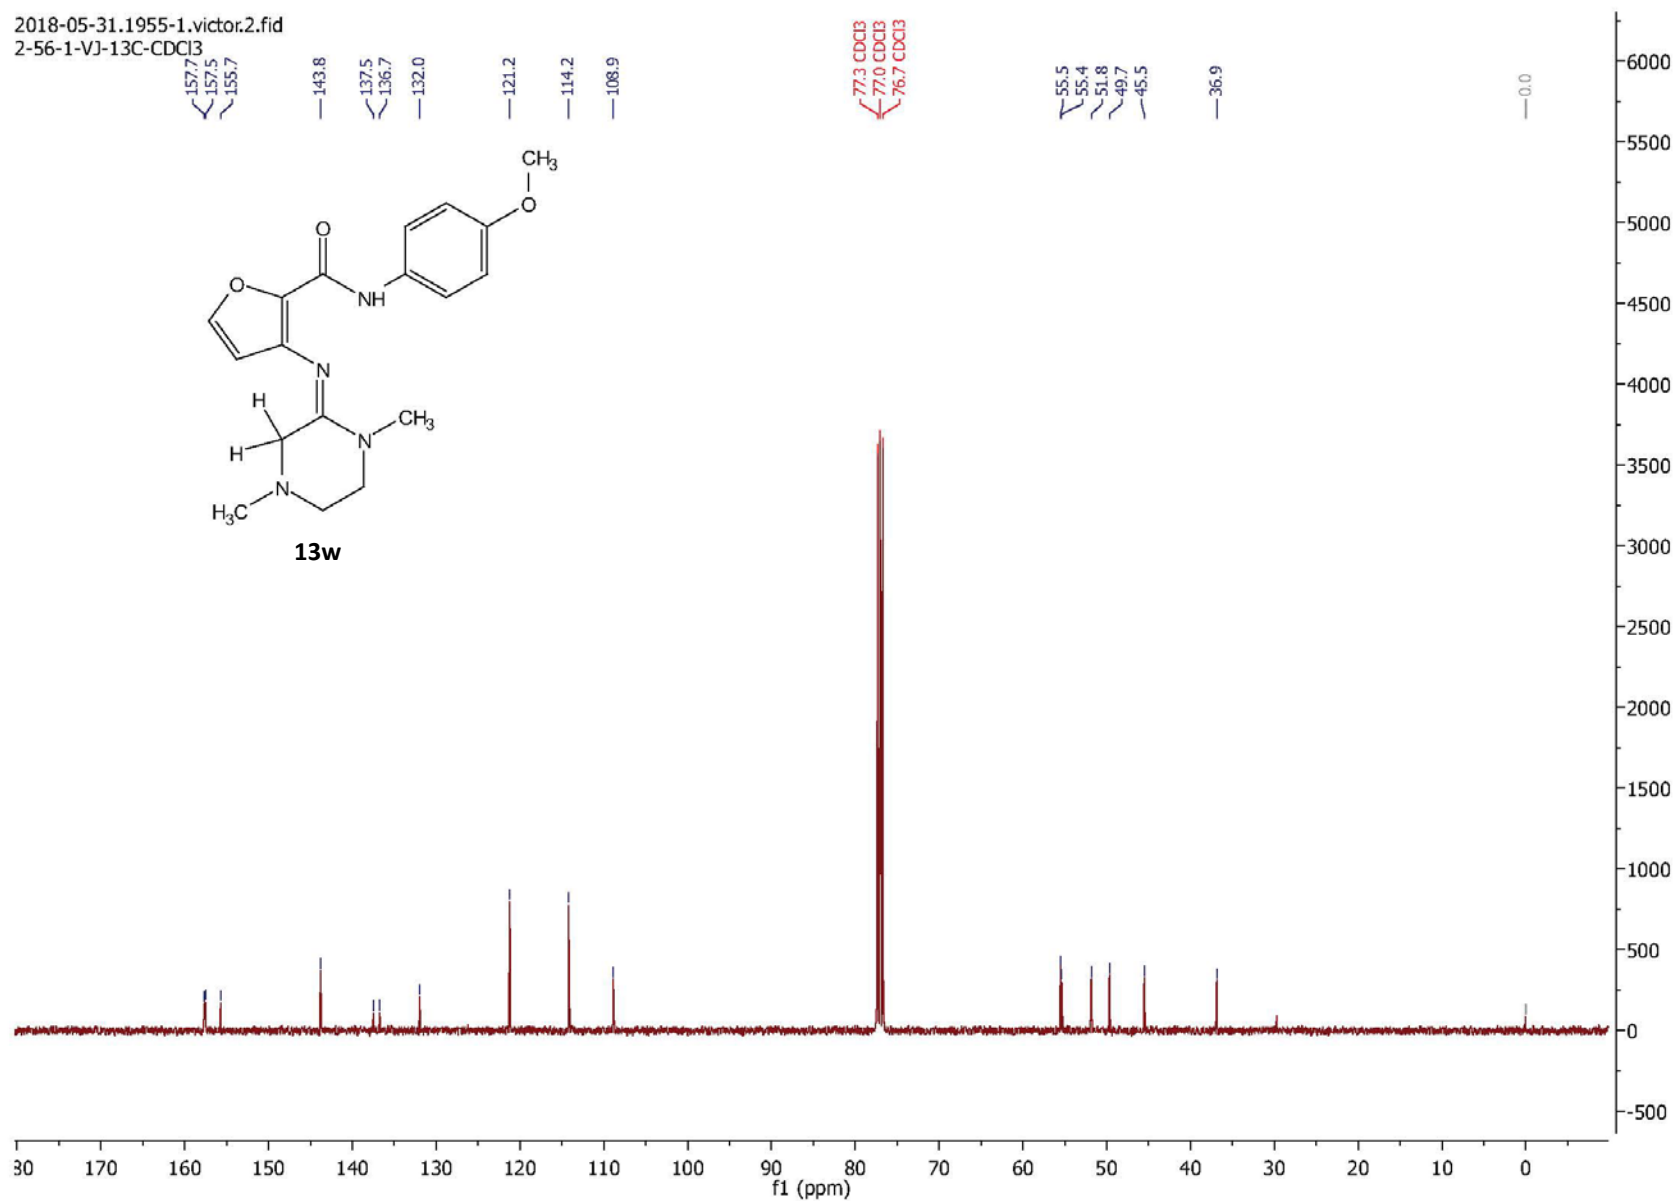



2018-06-03.1625-15.victor.2.fid  
2-175-1-VJ-13C-CDCl3

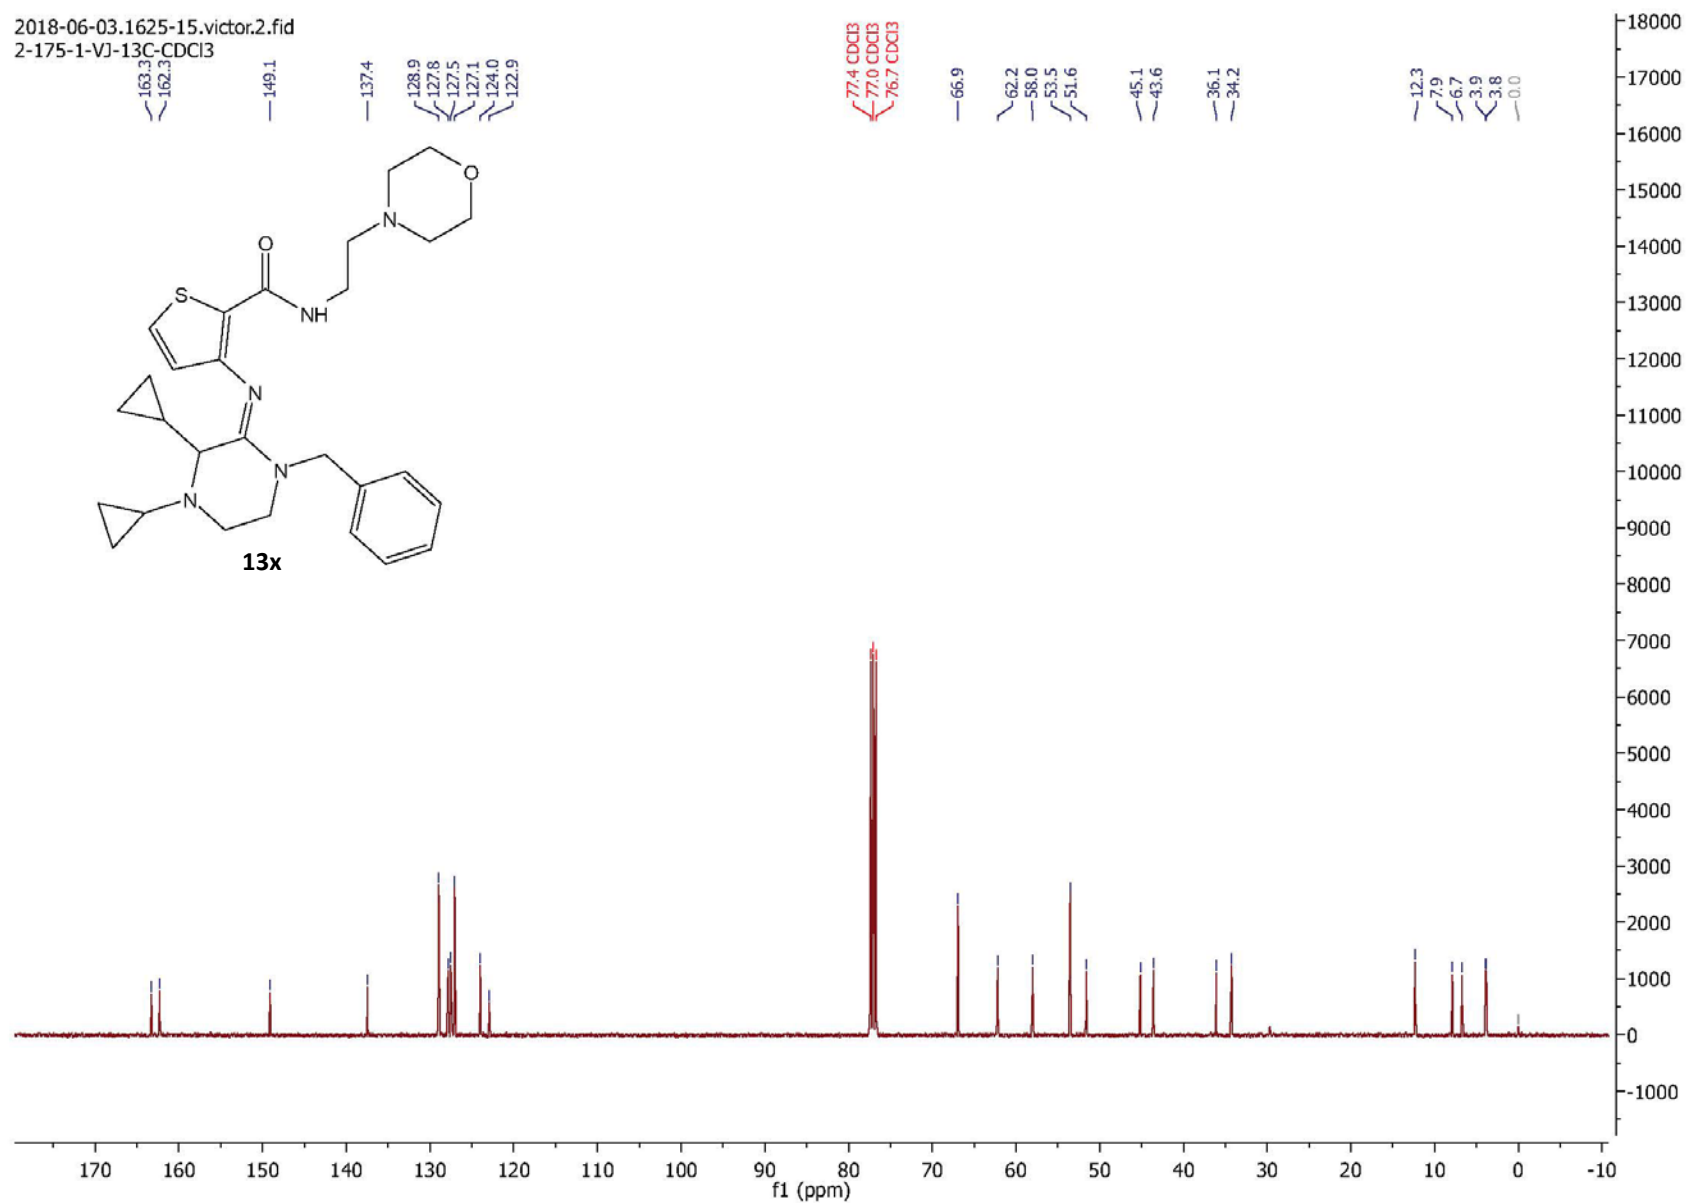

Supplement: c9ob00073a1.pdf [file c9ob00073a1.pdf]
